1 **Sex-specific and conserved gene co-expression networks underlie phenotypes**  
2 **within the paleopolyploid *Salvelinus* genus (Family Salmonidae)**

3 Ben J. G. Sutherland<sup>1†\*</sup>, Jenni M. Prokkola<sup>2</sup>, Céline Audet<sup>3</sup>, and Louis Bernatchez<sup>1</sup>

4 <sup>1</sup> Institut de Biologie Intégrative et des Systèmes (IBIS), Université Laval, Québec, QC G1V 0A6, Canada

5 <sup>2</sup> Institute of Integrative Biology, University of Liverpool, L69 7ZB Liverpool, UK

6 <sup>3</sup> Institut des Sciences de la Mer de Rimouski, Université du Québec à Rimouski, Rimouski, QC G5L  
7 3A1, Canada

8 †Current Address: Pacific Biological Station, Fisheries and Oceans Canada, Nanaimo, BC, V9T 6N7,  
9 Canada

10

11 \*Author for correspondence: BJGS

12 Pacific Biological Station, Fisheries and Oceans Canada, Nanaimo, BC, Canada

13 Phone: 1 (250) 751-4676

14 Email: ben.sutherland.1@ulaval.ca (BS)

15

16

17

18 **Data Deposition:** Brook Charr raw sequence data has been uploaded to SRA under BioProject

19 PRJNA445826, accession SRP136537. Arctic Charr raw sequence data is available under BioProject

20 PRJNA307980, accession SRP068854.

21  
22  
23  
24  
25  
26  
27  
28  
29  
30  
31  
32  
33  
34  
35  
36  
37  
38  
39  
40  
41  
42  
43  
44  
45  
46  
47  
48  
49  
50

## ABSTRACT

Networks of co-expressed genes produce complex phenotypes that are associated with sexual dimorphism, tissue-specificity, and functional novelty. Modules of potentially co-regulated genes can be compared across individuals to identify differences associated with phenotypic divergence. Here we use RNA-sequencing in the paleopolyploid salmonid Brook Charr *Salvelinus fontinalis* to characterize sex-specific co-expression networks within the liver of 100 full-sib offspring. Module conservation in each sex-specific network was tested in the alternate sex and in the congener Arctic Charr *Salvelinus alpinus*. Modules were further characterized by functional and chromosomal enrichment, hub gene identification, and correlation with 15 unique growth, reproductive and stress-related phenotypes. The majority of modules were conserved between sexes and species, including those involved in conserved cellular processes (e.g. translation, immune pathways). The few identified sex-specific modules may contribute to sexual dimorphism and resolution of sexual antagonism through gene regulation, including male-specific modules correlated with fish size or enriched for transcription factor activity. Most modules, including sex-specific modules, contained genes randomly dispersed throughout the genome, although several were overrepresented on specific chromosomes, suggesting an infrequent, but existing, chromosomal-based co-regulation. This comprehensive analysis provides network and chromosomal context to give insight into the transcriptome regulatory architecture of the paleopolyploid salmonids.

**Keywords:** Chromosome; Co-regulation; Salmonid; Transcriptomics; Whole Genome Duplication; Weighted Gene Co-expression Network Analysis (WGCNA)

51

## INTRODUCTION

52 Characterizing the genes and alleles that contribute to phenotypic variation is a central goal in genetics,  
53 and can be used to identify mechanisms underlying local adaptation or markers used for selective  
54 breeding. Typically this goal is addressed using association studies to identify genomic regions  
55 contributing to phenotypes (Mackay 2001; Bush and Moore 2012). Associating genotypes directly to  
56 phenotypes bypasses important intermediate regulatory steps such as gene transcription, which can be  
57 addressed in part with expression QTL (eQTL) mapping (Mackay et al. 2009). However, when  
58 considering the transcriptome, for example in eQTL studies, it is also important to consider the  
59 underlying structure of the network in which genes are co-regulated (Mähler et al. 2017).

60 Network context can aid in understanding gene-specific selective constraints based on network  
61 statistics (Mähler *et al.* 2017). Additionally, putting genes into a network can reduce many genes into a  
62 smaller set of modules that can be characterized for phenotype correlations (Filteau *et al.* 2013; Rose *et*  
63 *al.* 2015). Comparative network analyses can provide insight on sex differences (Langfelder *et al.* 2011),  
64 tissue differences, and even potential drivers of phenotypic change associated with adaptive divergence  
65 that may lead to ecological speciation (Filteau *et al.* 2013; Thompson *et al.* 2015). Comparing modules  
66 across species can advance the understanding of species-specific innovations. For example, comparison of  
67 human and chimp brain transcriptome networks identified low conservation for modules found in specific  
68 brain regions associated with human evolution such as the cerebral cortex (Oldham *et al.* 2006). In  
69 addition, cross-species gene co-expression analysis has been used to detect gene modules associated with  
70 disease (Mueller *et al.* 2017) or with seasonal phenotypic changes (Cheviron and Swanson 2017). These  
71 insights are often not possible to obtain through standard differential expression analysis, which captures  
72 a smaller proportion of the variation than differential co-expression analysis (Oldham *et al.* 2006; Gaiteri  
73 *et al.* 2014).

74 The development of sex differences in phenotypes and behavior can be attributed to differences in  
75 the expression of both sex-specific and autosomal genes, which can be mediated by both hormonal and  
76 epigenetic regulation (Ellegren and Parsch 2007; Wijchers and Festenstein 2011). Several aspects of  
77 sexual dimorphism remain under investigation, including the role of co-expression networks in solving  
78 sexual antagonism (i.e. conflicting selection pressures on phenotypes in each sex). Differing structure of  
79 networks between the sexes could provide a solution to sexual antagonism through gene regulation. Other  
80 genetic architecture solutions to this conflict may include sex-dependent dominance (Barson *et al.* 2015)  
81 or maintaining alleles associated with sexual antagonism on sex chromosomes (Blackmon and Brandvain  
82 2017). However, the analyses of co-expression networks are complicated by the observation that sexual  
83 dimorphism in networks can be tissue-specific. In mouse *Mus musculus*, modules found in the liver and  
84 adipose tissue were more different between sexes than those in the brain and muscle (van Nas *et al.*

85 2009). Similarly, networks were very similar between sexes in zebrafish *Danio rerio* brain (Wong *et al.*  
86 2014). Although the extent of differences may depend on the tissue of study, network comparisons  
87 between sexes can provide new insight into the regulatory underpinnings of sexual dimorphism and  
88 antagonism.

89 Constructing gene co-expression networks is often based on correlating transcript abundance  
90 (Langfelder and Horvath 2008). A network is comprised of nodes (i.e. genes) and their adjacencies (i.e.  
91 correlations with other genes), which together form modules (i.e. groups of correlated genes). Genes  
92 within a module may have similar functions or regulatory pathways, although this is not always the case  
93 (Gillis and Pavlidis 2012; van Dam *et al.* 2017). After network construction, genes that are highly  
94 connected and central to a module can be designated as hub genes. Hub genes may be more related to the  
95 function of the module than other genes within the module (van Dam *et al.* 2017), they can be more  
96 related to phenotypes correlated with the module (Langfelder *et al.* 2013), and can also be upstream  
97 regulators of other genes within the module. Hub genes can also be under higher selective constraint, and  
98 as a result may show lower genetic variation and higher phylogenetic conservation (Mähler *et al.* 2017).  
99 In summary, network information provides novel insight into both gene activity and evolution.

100 Functional characterization of modules can be achieved by correlating module principal  
101 components, i.e., “eigengenes”, with phenotypes of profiled individuals. Together with functional  
102 enrichment of modules, these correlations can provide some information on unknown genes in non-model  
103 systems (Pavey *et al.* 2012). Likewise, co-expression metrics can provide information about the stimuli  
104 under which a gene responds, or the other annotated genes with which the unknown gene is correlated.  
105 When transcriptomics is used to classify samples based on a panel of co-expressed genes, it is not  
106 necessary to know the function of all of the genes within the panel. For example, the viral disease  
107 development (VDD) marker suite was identified to classify the probable viral infection state of Pacific  
108 salmon, and the larger panel of genes within this suite contains unknown genes (Miller *et al.* 2017).  
109 Considering that the unannotated genes respond together with antiviral response genes, this is valuable  
110 information regarding the potential function of the unannotated genes for other studies.

111 Network evolution after a large-scale genome perturbation, such as whole genome duplication,  
112 remains poorly understood in vertebrates, and the structure of existing networks after this event may  
113 provide insight into the evolution of novel phenotypes. The salmonids (Family Salmonidae) are a  
114 valuable system for studying genome evolution post genome duplication given that the salmonid ancestor  
115 underwent a whole genome duplication approx. 60-88 million years ago (Allendorf and Thorgaard 1984;  
116 Crête-Lafrenière *et al.* 2012; Macqueen and Johnston 2014). The duplicated genome was then retained  
117 and largely rediploidized prior to the salmonid lineage diversification, although some regions remain in a  
118 residual tetraploid state (Kodama *et al.* 2014; Lien *et al.* 2016). Within this context, characterizing

119 networks of genes in the salmonids not only will provide new information on specific genes but also  
120 begins to characterize the potential evolution and rewiring of gene regulatory networks post genome  
121 duplication. Given the high economic, cultural, and environmental value of salmonids, additional  
122 information regarding their responses to selection, stress and pathogens is invaluable.

123 Charr (*Salvelinus* spp.) are an under-characterized and phenotypically diverse group within  
124 Family Salmonidae. Brook Charr *Salvelinus fontinalis* is a primarily freshwater species native to Eastern  
125 North America, whereas Arctic Charr *S. alpinus* has a circumpolar distribution mainly in the Arctic and  
126 has freshwater and anadromous life-history types with multiple ecotypes. These two lineages diverged  
127 approximately 10 million years ago (Horreo 2017) but are adapted to different environments. Brook Charr  
128 are sensitive to low oxygen and are limited to sub-Arctic regions whereas Arctic Charr are highly tolerant  
129 to cold and hypoxia but intolerant to high temperatures (Anttila *et al.* 2015) and stay in ice-covered lakes  
130 and ponds through long Arctic winters. Brook Charr are an important fish for sports fishing in Eastern  
131 North America, and Arctic Charr are an important food source for Northern communities. With a  
132 changing climate, both of these species may be at risk due to higher temperatures and changing ecosystem  
133 structures.

134 Here we profile liver transcriptomes of 100 Brook Charr offspring from a single family by RNA-  
135 sequencing to characterize co-expression patterns. Transcriptome profiling was conducted shortly (3 h)  
136 after the application of an acute handling stressor to all individuals during the reproductive season,  
137 increasing variance among individuals. The goals of this study are to i) characterize the underlying  
138 modular structure of gene co-expression in Brook Charr; ii) identify which modules are conserved or  
139 specific between sexes and within the congener Arctic Charr *S. alpinus*; and iii) link phenotypic  
140 correlation, functional gene enrichment and chromosomal information to the identified networks. This  
141 large characterization of a co-expression network provides valuable insight on transcription regulatory  
142 architecture in a non-model salmonid and provides network metrics for unannotated and annotated genes  
143 within the liver transcriptome of Brook Charr.

144

145

## METHODS

### *Animals and sample collection*

147 Juvenile Brook Charr used in this study were originally used by Sauvage *et al.* to construct a low-density  
148 genetic map for reproductive (2012a), growth and stress response QTL analyses (2012b), and to construct  
149 a high-density genetic map that was integrated with the other salmonids (Sutherland *et al.* 2016) then used  
150 to identify QTL, recombination rate differences between the sexes, and the Brook Charr sex chromosome  
151 (Sutherland *et al.* 2017). The 192 F<sub>2</sub> individuals were full sibs from a single family resulting from a cross

152 of an F<sub>1</sub> female and F<sub>1</sub> male that were from an F<sub>0</sub> female from a wild anadromous population (Laval  
153 River, near Forestville, Québec) and an F<sub>0</sub> male from a domestic population (Québec aquaculture over  
154 100 years). F<sub>2</sub> offspring were raised until 65-80 g and then 21 phenotypes were collected along with  
155 several repeat measurements to determine growth rate. Full details on these phenotypes are previously  
156 described (Sauvage *et al.* 2012a, 2012b), including full details on sex-specific averages and standard  
157 deviations of phenotype values in all 192 offspring (see Table S1 from Sutherland *et al.* 2017). Note that  
158 the present study only includes 100 offspring, but these values provide information on the general trends  
159 in sex differences and phenotype value ranges. Correlations between phenotypes are also previously  
160 reported (see Figure S2 of Sutherland *et al.* 2017). The 15 phenotypes used in the present study were  
161 maturity, length, weight, growth rate, condition factor, liver weight, post-stress cortisol, osmolality and  
162 chloride, change in cortisol, osmolality and chloride between one week before and three hours after an  
163 acute handling stress, egg diameter, sperm concentration, and sperm diameter. Fish were anaesthetized  
164 with 3-aminobenzoic acid ethyl ester and killed by decapitation as per regulations of Canadian Council of  
165 Animal Protection recommendations approved by the University Animal Care Committee, as previously  
166 reported (Sauvage *et al.* 2012a). Most individuals were in a reproductive state at the time of the  
167 dissection. Phenotypic sex was determined by gonad inspection (Sauvage *et al.* 2012b). Immediately after  
168 decapitation, liver tissue was excised, flash frozen then kept at -80 °C until RNA extraction.

169

#### 170 *RNA extraction and library preparation*

171 A total of 100 of the 192 individuals were used for liver transcriptome profiling. Prior to extraction,  
172 samples were assigned random order to reduce batch effects on any specific group of samples. Total RNA  
173 was extracted from equal sized pieces of liver tissue from approximately the same location on the liver for  
174 all samples (0.4 x 0.2 x 0.2 cm; ~1 mg). This piece was rapidly immersed in 1 ml TRIzol (Invitrogen),  
175 then placed on dry ice until all samples per batch were prepared (6-12 per extraction round). When all  
176 samples were ready, the samples immersed in frozen TRIzol were allowed to slightly thaw for  
177 approximately 1 min until beads within the vials were able to move, then the samples were homogenized  
178 for 3 min at 20 hz, rotated 180°, and homogenized again for 3 min at 20 hz on a MixerMill (Retsch). The  
179 homogenate was centrifuged at 12,000 x g for 10 min at 4 °C. The supernatant was transferred to a new 2  
180 ml tube and incubated for 5 min at room temperature. Chloroform (200 µl) was added to the tube, the tube  
181 was shaken vigorously for 15 s and incubated 3 min at room temperature, then centrifuged at 12,000 x g  
182 for 15 min at 4 °C. Finally the aqueous layer was carefully transferred to a new centrifuge tube, as per  
183 manufacturer's instructions. This aqueous layer was put onto an RNeasy spin column (QIAGEN) as per  
184 manufacturer's instructions with the optional on-column DNase treatment. All samples were quality

185 checked using a BioAnalyzer (Agilent), where all samples had  $RIN \geq 8.3$  (mean = 9.5), and were  
186 quantified using spectrophotometry on a Nanodrop-2000 (Thermo Scientific).

187 Libraries were prepared in the randomized order using TruSeq RNA Sample Prep Kit v2  
188 (Illumina) to generate cDNA as per manufacturer's instructions using adapters from both Box A and Box  
189 B, AMPure XP beads (Agencourt) and a magnetic plate in batches of 8-16 samples per batch. A total of 1  
190  $\mu\text{g}$  total RNA was added to each reaction, and the manufacturer's instructions were followed to construct  
191 sequencing libraries. Fragmentation times of 2, 4 and 6 min were tested for optimal size fragmentation  
192 and consistency, and as a result of this test, all samples were processed using a 6 min fragmentation time  
193 to ensure inter-sample consistency. PCR amplification to enrich cDNA was performed using 15 cycles, as  
194 per manufacturer's instructions. All libraries were quantified using Quant-iT PicoGreen (ThermoFisher)  
195 and quality checked using the BioAnalyzer on High Sensitivity chips (Agilent). Once all samples were  
196 confirmed to be high quality and of approximately the same insert size, eight individually tagged samples  
197 were pooled in equimolar quantities (80 ng per sample) and sent to McGill Sequencing Center for 100 bp  
198 single-end sequencing on a HiSeq2000 (Illumina; total = 13 lanes). Parents ( $F_1$  individuals) were  
199 sequenced in duplicate in two separate lanes.

200

#### 201 *RNA-seq mapping and normalization*

202 Quality trimming and adapter removal was performed using Trimmomatic (Bolger et al. 2014), removing  
203 adapters with the *-illuminaclip* (2:30:10) option and removing low quality reads ( $< Q2$ ) using *-*  
204 *slidingwindow* (20:2), *-leading* and *-trailing* options. Q2 was used for optimal quantification as previously  
205 demonstrated (MacManes 2014). A reference transcriptome for Brook Charr was obtained from the  
206 Phylofish database (Pasquier et al. 2016). Trimmed reads were mapped against the reference  
207 transcriptome with *bowtie2* (Langmead and Salzberg 2012) using *--end-to-end* mode reporting multiple  
208 alignments (*-k* 40) for optimal use with eXpress for read count generation (Roberts and Pachter 2013).  
209 The multiple alignment file was converted to bam format and sorted by read name using SAMtools (Li et  
210 al. 2009) and input to eXpress (see full bioinformatics pipeline in *Data Accessibility*).

211 Read counts were imported into edgeR (Robinson et al. 2010) for normalization and low  
212 expression filtering. The smallest sequence library (lib87, 8,373,387 alignments) was used to calculate a  
213 low-expression threshold, where transcripts with fewer than 10 reads mapping per transcript in this library  
214 was used as the count-per-million (cpm) threshold (1.19), as suggested in the edgeR documentation. Any  
215 transcript passing this threshold in at least five individuals was retained for downstream analysis.  
216 However, additional low expression filtering was conducted per sex separately (see below). The  
217 remaining reads were normalized using the weighted trimmed mean of M-values (TMM Robinson and  
218 Oshlack 2010). Finally,  $\log_2$  cpm values were generated using normalized library sizes and exported as a



219 matrix file. Although transcripts were previously annotated in the Phylofish database (Pasquier *et al.*  
220 2016), each transcript was re-annotated using *tblastx* against Swissprot (cutoff =  $1e^{-5}$ ) to obtain as many  
221 identifiers as possible for Gene Ontology enrichment analysis. For individual gene descriptions, the re-  
222 annotated Swissprot identifier was used primarily, and the Phylofish annotation secondarily.

223

#### 224 *Weighted gene co-expression network analysis (WGCNA) in Brook Charr*

225 Normalized  $\log_2$  cpm expression levels for all individuals were used as an input for weighted gene  
226 correlation network analysis (WGCNA; Langfelder and Horvath 2008; 2012). To best associate modules  
227 with phenotypes of interest, sexes were analyzed separately and evaluated for conservation in the second  
228 sex (Langfelder *et al.* 2011). Due to the independent analysis of each sex, low expression filters (i.e. cpm  
229  $> 0.5$  in at least five individuals) were conducted separately in each sex. The average library size was  
230 27,896,535 alignments, indicating cpm  $> 0.5$  corresponds to at least 13.95 reads aligning to the transcript  
231 for this mean library size.

232 Within each sex, transcriptome outliers were detected and removed by clustering samples based  
233 on transcript expression by Euclidean distance and visually inspecting relationships with the *hclust*  
234 average agglomeration method of WGCNA (Langfelder and Horvath 2008). Removal of outliers prevents  
235 spurious correlations of modules due to outlier values and improves network generation (Langfelder *et al.*  
236 2011). Remaining samples were then correlated with trait data using *plotDendroAndColors*. Network  
237 parameters for both female and male networks were defined as per tutorials using unsigned correlation  
238 networks (Langfelder and Horvath 2008). Unsigned networks consider the connectivity between similarly  
239 positive or negative correlations to be equal. Thus genes in the same module may have similar or inverse  
240 expression patterns. An optimal soft threshold power (6) was identified by evaluating effects on the scale  
241 free topology model fit and mean connectivity by increasing the threshold power by 1 between 1-10 and  
242 by 2 between 12-20 (Figure S1), as suggested by Langfelder and Horvath (2008). An unsigned adjacency  
243 matrix was generated in WGCNA to identify the 25,000 most connected transcripts to retain to reduce  
244 computational load. Finally, to further minimize noise and spurious associations, adjacency relationships  
245 were transformed to the Topological Overlap Matrix using the *TOMdist* function (Langfelder and Horvath  
246 2008).

247 Similarity between modules was evaluated using module eigengenes (i.e. the first principal  
248 component of the module). Dissimilarity between eigengenes was calculated by signed Pearson  
249 correlation as suggested by Langfelder and Horvath (2008) and plotted using *hclust*. When modules were  
250 more than 0.75 correlated (dissimilarity 0.25), they were merged as suggested by Langfelder and Horvath  
251 (2008). Merged module eigengenes were then correlated against phenotypes by Pearson correlations.  
252 Notably the sign of the correlation does not necessarily indicate the sign of correlation between the



253 expression of specific genes in each module and the phenotype because the modules were built using  
254 unsigned networks.

255 Network metrics for individual genes were calculated, including Gene Significance (i.e. the  
256 absolute value of the trait-gene correlation) and Module Membership (i.e. the module eigengene-gene  
257 correlation). Module membership was used to define the top central genes for modules of interest (i.e. hub  
258 genes) and the module membership values of each gene within its cluster were determined. Gene  
259 Significance characteristics were calculated for traits weight, specific growth rate, condition factor,  
260 hepatosomatic index, change in cortisol, osmolality and chloride from the brief handling stressor, female  
261 egg diameter, and male sperm concentration and diameter.

262 Enrichment analysis of clusters was conducted using the re-annotated Swissprot identifiers in  
263 DAVID Bioinformatics (Huang *et al.* 2009). Heatmaps were generated by using the package *gplots*  
264 (Warnes *et al.*) using the normalized  $\log_2$  cpm data. Expression values were standardized across samples  
265 for each gene and Pearson correlation was used to cluster genes and samples.

266 To determine sex-specific or sex-conserved modules, module conservation was evaluated by  
267 comparing male gene expression to the generated female modules, and visa-versa, using the  
268 *modulePreservation* function of WGCNA. A total of 200 permutations of randomly assigned module  
269 labels were used to calculate module preservation rank and Zsummary (Langfelder *et al.* 2011). Low  
270 Zsummary scores indicate no preservation ( $\leq 2$ ), intermediate indicate moderate preservation (2-10) and  
271 high scores ( $\geq 10$ ) indicate strong module preservation (Langfelder *et al.* 2011). Module quality was also  
272 determined for each module as a measure of module robustness that is characterized by conducting the  
273 analysis on multiple random subsets of the original data (Langfelder *et al.* 2011). In addition, cross-  
274 tabulation of the proportions of female modules in male modules and visa-versa were performed in R (R  
275 Core Team 2018) to determine when a majority of one module was found in a module of the opposite sex.  
276 Cross-tabulation requires similar modular structures of the compared networks, whereas adjacency  
277 comparisons directly compare co-expression independent of network topology. All pipelines to analyze  
278 the current results are documented and available on GitHub (see *Data Accessibility*).

279  
280 *Module conservation in Arctic Charr*

281 To compare module conservation between Brook Charr and Arctic Charr *S. alpinus* we used RNA-seq  
282 data from 1+ year-old Arctic Charr. The broodstock of this population was reared in hatchery conditions  
283 for three generations after being collected from a subarctic, land-locked population in Finland (Lake  
284 Kuolimo, 61°16' N; 27°32' E). The data were collected from nine male liver samples from each of 8 °C  
285 and 15 °C (total = 18 samples), but due to a large effect of temperature on the Arctic Charr transcriptome,  
286 only the nine samples from the lower temperature were used here (8 °C, normal rearing temperature

287 during summer at the fish hatchery; Figure S2) (Prokkola *et al.* 2018). Fish body mass at 8°C was on  
288 average 24.2 g ± standard deviation (S.D.) 10.4 g. Sample processing was explained fully by Prokkola et  
289 al (2018) and briefly described here. In August 2013, fish were euthanized using 200 ppm sodium  
290 bicarbonate-buffered tricaine methanesulfonate (MS-222), after which liver samples were collected and  
291 flash frozen in liquid nitrogen (Prokkola *et al.* 2018). RNA was extracted from approximately 10 mg of  
292 liver tissue using Tri-reagent (Molecular Research Center), and quality checked using a BioAnalyzer  
293 (Agilent), with an average identified RNA integrity number of 9.95. Strand-specific cDNA library  
294 preparation and sequencing were conducted at Beijing Genomics Institute (BGI Hong Kong) using  
295 TruSeq RNA Sample Prep Kit v2 (illumina) and sequenced on an Illumina HiSeq2000 instrument to  
296 generate paired-end 100 bp reads. All samples were pooled with unique barcodes across four sequencing  
297 lanes. Adapters were removed at BGI, and reads trimmed with Trimmomatic (Bolger et al. 2014) using  
298 options *leading* and *trailing* (5) *slidingwindow* (4:15) and *minlen* (36). From samples included in this  
299 study, on average 41.7 ± S.D. 7.4 million reads were obtained. Transcript expression was calculated as  
300 above, including using the Brook Charr reference transcriptome for ease of cross-species comparisons.  
301 Data filtering, normalization and WGCNA input was conducted as above. However, modules were not  
302 generated from these samples due to the smaller sample size within only the 8°C temperature relative to  
303 the Brook Charr samples. Using samples from both temperatures, modules were previously identified  
304 (Prokkola *et al.* 2018). Once normalized and input to WGCNA, read counts in Arctic Charr 8°C samples  
305 were used to build a gene adjacency matrix, which was then compared against modules generated for  
306 female and male Brook Charr samples using the *modulePreservation* function as described above.  
307 Caveats regarding this data should be noted, including the smaller sample size, minor differences in  
308 rearing environments (albeit both were reared in hatchery conditions), and the maturity stage of the fish.

309

### 310 *Identifying one transcript per gene and assigning chromosome positions*

311 The reference transcriptome (see *Data Accessibility*) possibly contains multiple isoforms for a single  
312 gene, and therefore to investigate chromosome enrichment of identified modules, an approach to limit the  
313 transcriptome to a single transcript per gene was applied here. First, the Brook Charr reference  
314 transcriptome was aligned to the Atlantic salmon *Salmo salar* chromosome-level genome assembly  
315 RefSeq GCF\_000233375.1 (Lien *et al.* 2016) using GMAP (Wu and Watanabe 2005). Output alignments  
316 were converted to an indexed bam file with only high quality (-q 30) alignments retained using samtools  
317 (Li *et al.* 2009). The indexed bam was converted to a bed file using bedtools *bamtobed* (Quinlan and Hall  
318 2010). Total lengths of each Brook Charr transcript were determined using python scripts (see *Data*  
319 *Accessibility*). Using alignments against the Atlantic Salmon genome, a single Brook Charr transcript was  
320 retained for every group of transcripts that aligned in a continuous overlapping block on the Atlantic

321 Salmon genome using a custom R script (see *Data Accessibility*). This script preferentially retained the  
322 longest expressed transcript of the contiguous block, when possible, and discarded all other redundant  
323 transcripts as well as those that did not align. In some cases, a single transcript can align to multiple  
324 locations with high mapping quality ( $\text{MAPQ} \geq 30$ ). Since there was no reason to retain one alignment  
325 over another, both alignments were retained in the baseline set for these cases. In the case that both  
326 alignments were to the same chromosome, which could occur due to tandem duplication of genes, this  
327 was noted during chromosome enrichment analysis (see below).

328 The alignment information per retained Brook Charr transcript was used to assign an Atlantic  
329 Salmon chromosome identifier to each retained unique transcript, and this was combined with the co-  
330 expression network information of the transcript, specifically its assigned module. This analysis was  
331 conducted separately for females and males, as expressed genes are in some cases different between the  
332 two sexes and therefore so would the selection of which transcript to retain. Finally, for each co-  
333 expression module, the proportions of Brook Charr genes belonging to each Atlantic Salmon  
334 chromosome were characterized and compared to the total list of all non-redundant Brook Charr  
335 transcripts identified. Fisher exact tests were then used to determine significance for each module-  
336 chromosome combination ( $p \leq 0.01$ ). The correspondence between the Atlantic Salmon genome assembly  
337 accession identifier and the Atlantic Salmon chromosome identifier were obtained from the NCBI  
338 genome assembly website (see *Data Accessibility*).

339 The approach taken here and described below is conservative and has some drawbacks that would  
340 reduce power, but is superior to including the same gene multiple times for multiple isoforms. The main  
341 drawback is that this method of redundancy identification depends on the alignment against the reference  
342 genome and therefore any genes not aligning were removed. Further, the non-target reference genome  
343 will have differences from our focal species. However, even though large scale fusions may differ among  
344 the salmonids, much of the within chromosome arm synteny is retained, as previously demonstrated  
345 (Sutherland *et al.* 2016). Using the chromosome correspondence between Atlantic Salmon and Brook  
346 Charr within previous work (Sutherland *et al.* 2016), the Brook Charr chromosomes enriched for specific  
347 modules can be identified. It is probable that resulting enrichments would be stronger if all genes were  
348 successfully aligned to the reference genome, and if the reference genome was within the focal species.  
349 Nonetheless, this approach reduced many isoforms down to a fewer number of unique genes for the  
350 purpose of characterizing chromosome enrichment from each module in this non-model species without  
351 an intraspecific reference genome. Other approaches have been used to reduce redundancy in *de novo*  
352 reference transcriptomes of salmonids, although these are often conducted during the process of  
353 assembling the transcripts. For example, four reference transcriptomes were reduced by approximately 4-

354 fold in transcript number (Carruthers *et al.* 2018) using the transdecoder pipeline (Haas *et al.* 2013) then  
355 reducing marginally further using CD-hit-EST (Li and Godzik 2006).

356

357

## RESULTS

### 358 *Transcriptome overview*

359 Of the total 69,440 transcripts in the Brook Charr reference transcriptome, 51,911 passed initial low  
360 expression filters (counts-per-million mapped reads (cpm) > 1.19 in at least 5 individuals when using all  
361 samples together including females, males, and male Arctic Charr). This corresponded to at least 10 reads  
362 mapping per transcript in the smallest library size. Subsequent filtering within each sex individually (cpm  
363 > 0.5 in at least 5 individuals; corresponding to > 13 reads mapping based on average library size)  
364 resulted in 50,748 and 50,530 transcripts passing filters in females and males, respectively. When  
365 considering each sex individually, most of the expressed genes were expressed in a majority of the  
366 samples, with females expressing 35,461 transcripts in > 90% of the samples, and males expressing  
367 35,714 transcripts in > 90% of the samples (see Figure S3).

368 Hierarchical clustering of samples by gene expression indicated a large effect of sex, where 35 of  
369 47 F<sub>2</sub> females were all clustered together with the F<sub>1</sub> female, and 52 of 53 F<sub>2</sub> males were clustered together  
370 with the F<sub>1</sub> male (Figure 1). As described in the Methods, outliers were removed to avoid spurious  
371 network correlations (Langfelder *et al.* 2011), and this included the removal of one male leaving 52 males  
372 remaining, and the removal of one group of females that had large liver weight, leaving 35 females  
373 remaining (see phenotype liver weight in Figure 1; Figure S4). When these samples were included while  
374 constructing the female network, many modules correlated with the liver weight phenotype, suggesting  
375 that these samples were having a large impact on the network. Interestingly, females displayed higher  
376 inter-individual variance than males, as indicated by the multiple smaller clusters of females in the  
377 hierarchical clustering relative to the fewer and larger clusters of the males (Figure 1).

378

### 379 *Network construction and phenotype correlations: female Brook Charr*

380 Highly correlated module eigengenes ( $r > 0.75$ ) were merged, combining 81 assigned modules into 14  
381 (Figure 2A; Figure S5A). Assigned female modules each contained a range of 77-10,533 transcripts  
382 (Table 1). The largest module was *darkred*, with 10,533 transcripts (see Table 1), which included more  
383 transcripts than even the unassigned *grey* module (second largest; 5,892 transcripts).

384 Phenotype correlations with module eigengenes indicate potential functional associations of the  
385 modules (Table 1; Figure 3). Only non-redundant phenotypes were used ( $n = 15$ ). The strongest  
386 associations of phenotypes to modules were with maturity index, for example with *thistle2* ( $r > 0.81$ ), and  
387 *corall* ( $r = -0.83$ ). Although the large liver weight outlier samples were removed prior to network

388 generation, liver weight remained highly correlated with *indianred4* ( $r = 0.73$ ), *salmon*, *coral* ( $r = 0.52$ ),  
389 and *blue2* ( $r = -0.64$ ). Growth rate showed similar module correlations to liver weight (Figure 3).  
390 Osmolality change was also correlated with *indianred4* ( $r = 0.56$ ) and *blue2* ( $r = -0.58$ ), as well as with  
391 *darkred*, *thistle3* ( $r \geq 0.51$ ), *darkorange*, *green* and *darkmagenta* ( $r \geq -0.49$ ). Chloride change had no  
392 significant associations, but post-stress chloride was correlated with *thistle3* ( $r = 0.56$ ) and *lightsteelblue*  
393 ( $r = -0.53$ ). Although no modules were significantly associated with cortisol (change or post-stress;  $p \geq$   
394 0.01), *ivory* was close ( $r = -0.38$ ;  $p = 0.03$ ).  
395

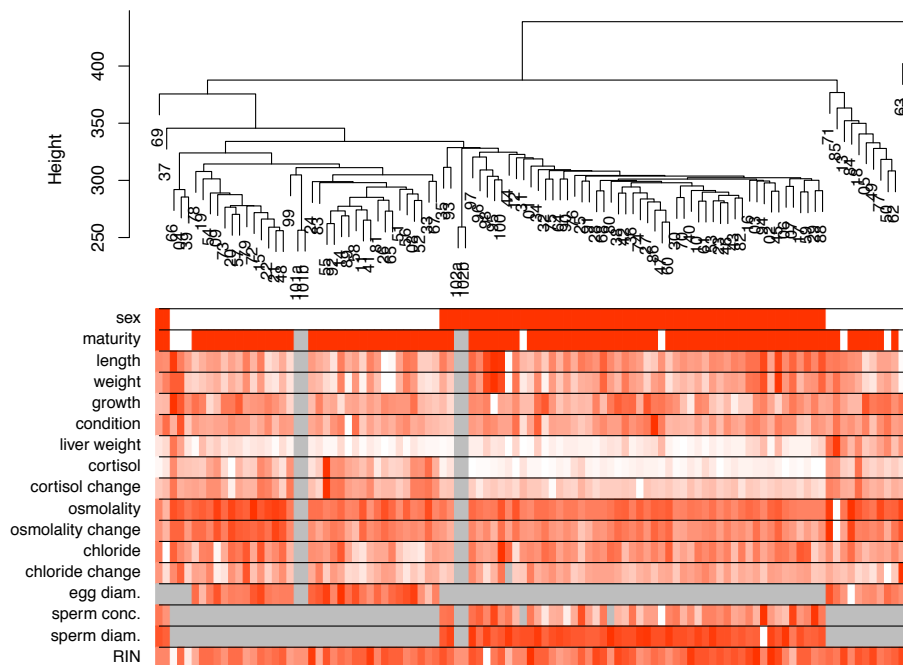

396  
397 **Figure 1.** Brook Charr individual samples clustered by gene expression similarity using all genes (top)  
398 with corresponding trait values shown in the heatmap (bottom). Sex was the largest factor affecting the  
399 data (see heatmap sex row; white = females; red = males). Parents were sequenced in duplicate, and  
400 clustered with the offspring of their respective sex (see 101ab for mother and 102ab for father). Females  
401 with large liver weight clustered outside the other female samples (see on the right hand side of the  
402 heatmap liver weight row).

403  
404 In addition to the correlations with phenotypes, functional enrichment analysis of the genes  
405 within modules was conducted (Table 1; Additional File S1). The *salmon* module (correlated with liver  
406 weight) was enriched for erythrocyte development. The *blue2* module (liver weight) was associated with  
407 ribonucleoprotein complex. *Darkorange*, *green*, and *darkmagenta* modules (all correlated with osmolality  
408 change) were enriched for small molecular metabolic process, translation and metabolism functions,

409 respectively. Some modules did not have significant enrichment of biological processes, such as  
410 *lightsteelblue* (correlated with chloride change).  
411

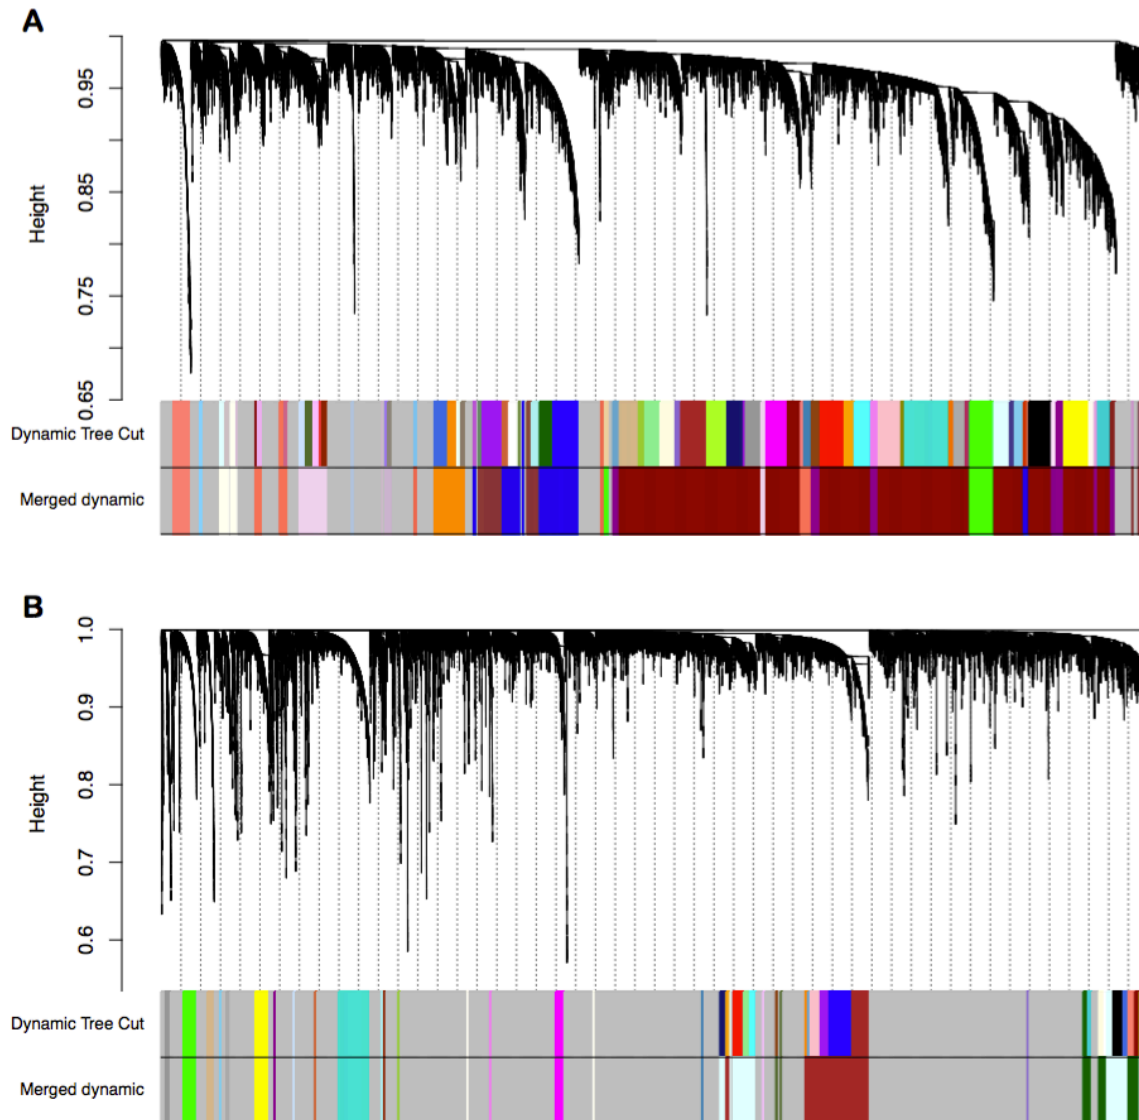

412  
413 **Figure 2.** Transcripts clustered by co-expression shown as similarity to neighbouring gene shown as  
414 vertical lines (top) and shown with assigned module (bottom) in (A) females and (B) males. Modules are  
415 shown prior to merging (Dynamic Tree Cut) and after merging similar clusters (Merged dynamic). More  
416 transcripts were assigned to modules in females (76%) than in males (28%). Note: transcript order is not  
417 retained and module colors are not related in (A) and (B).  
418

#### 419 *Conservation of co-expression: female Brook Charr network*

420 The conservation of co-expression of female Brook Charr modules in Brook Charr males was primarily  
421 evaluated using network adjacency comparisons, which are more sensitive and robust than cross-  
422 tabulation methods (Langfelder *et al.* 2011). Most female modules were conserved in males and only



423 *darkred* had weak evidence for conservation (Table 1; Figure 4A). *Green* was the most conserved  
 424 ( $Z_{summary} = 100$ ), followed by *blue2*, *salmon*, *lightsteelblue* and *darkorange* ( $Z_{summary} \geq 48$ ; Figure  
 425 4A; Table 1). Modules associated with translation activities were among the highest conserved modules  
 426 (e.g. *green* and *blue2*).  
 427

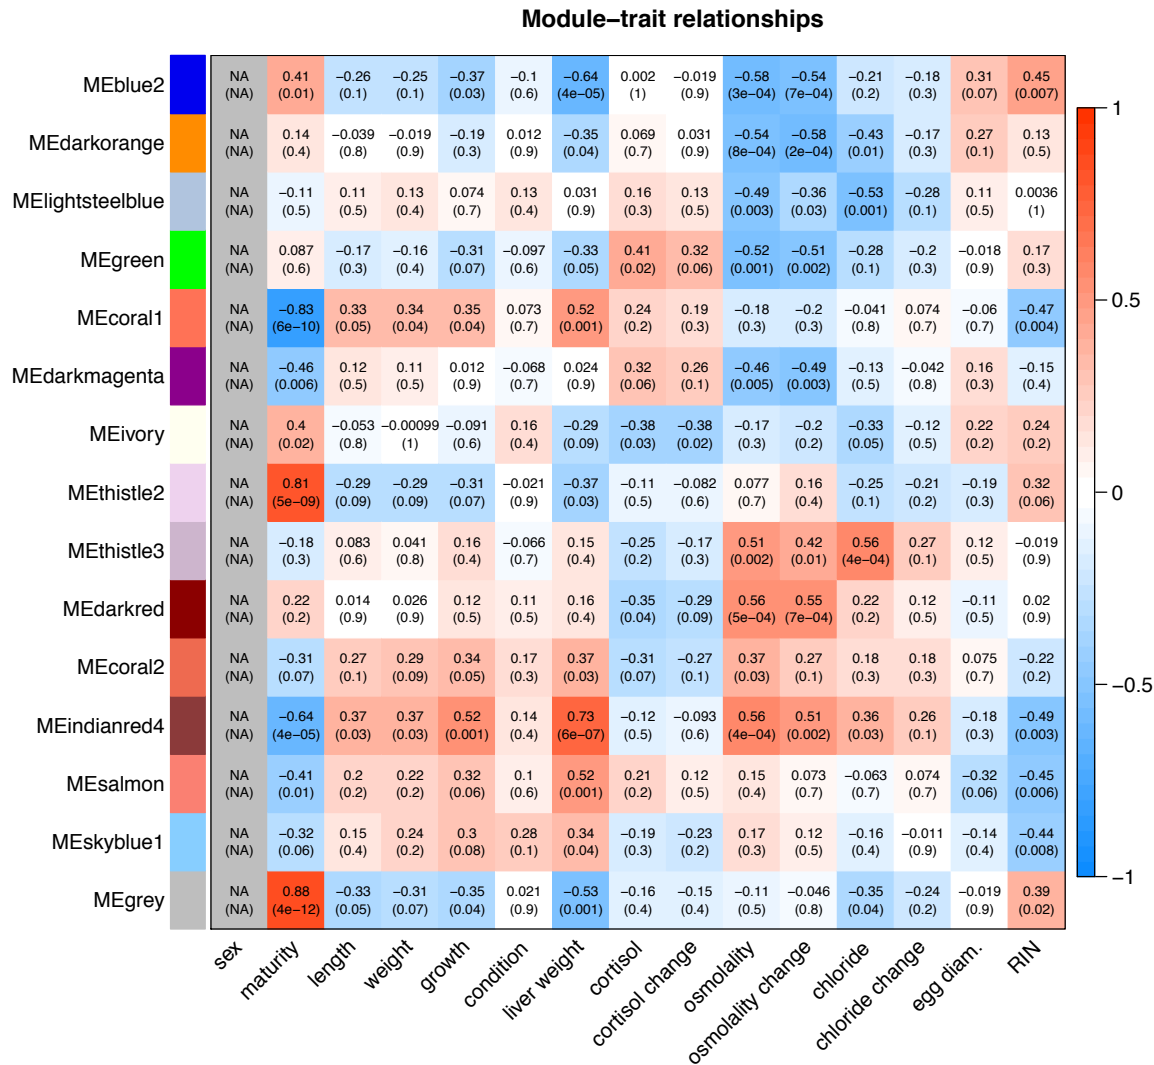

428  
 429 **Figure 3.** Module-trait relationships for Brook Charr females, including correlation r-value and p-values.  
 430 The boldness of color indicates the strength of the relationship. Module-trait correlations are also shown  
 431 in Table 1 with more general grouping of traits alongside other metrics such as module size and enriched  
 432 Gene Ontology categories. Male module-trait relationships are shown in Figure S6.  
 433

434 To further inspect cross-species conservation of co-expression, samples were obtained from a  
 435 recent transcriptomic analysis of male Arctic Charr liver (Prokkola *et al.* 2018). Even with caveats  
 436 regarding sample size (see Methods), several female Brook Charr modules were highly preserved in



437 Arctic Charr males, including *blue2* (Zsummary = 34), *green* (Zsummary = 24), and *salmon* (Zsummary  
 438 = 17; Figure 4B), also the most conserved in male Brook Charr (Table 1; Figure 4A). Other female  
 439 Brook Charr modules with moderate evidence for conservation in male Arctic Charr included *darkorange*  
 440 and *lightsteelblue* (Zsummary > 8), which were also highly conserved in male Brook Charr. It is  
 441 noteworthy that the ranking of preservation of female modules in the Arctic Charr and Brook Charr males  
 442 is highly similar (Table 1).

443

444 **Table 1.** Female modules shown with the number of transcripts within the module (n), the general  
 445 category of traits correlated with the module ( $p \leq 0.01$ ), the most significantly enriched Gene Ontology  
 446 category (Biological Process), the Zsummary for preservation of the module in Brook Charr males (BC  
 447 m) and Arctic Charr males (AC m), as well as the module quality (robustness). Zsummary < 2 is not  
 448 conserved,  $2 < Zsummary < 10$  is moderately conserved, and  $> 10$  is conserved. The *grey* module  
 449 includes unassigned genes and the *gold* module is a random selection of 1000 genes from the assigned  
 450 modules for testing preservation metrics. Full module-trait correlations are shown in Figure 3A, full GO  
 451 enrichment in Additional File 1, and expanded summaries of this table in Additional File S2.

452

| Module                | n     | Traits                                    | GO Enrichment (BP)                                                 | Preservation<br>BC m   AC m | Quality |
|-----------------------|-------|-------------------------------------------|--------------------------------------------------------------------|-----------------------------|---------|
| <i>green</i>          | 725   | blood                                     | translation                                                        | 100   24                    | 75      |
| <i>blue2</i>          | 1762  | blood; liver;<br>maturity; RIN            | ribonucleoprotein complex<br>biogenesis                            | 71   32                     | 58.5    |
| <i>salmon</i>         | 449   | liver;<br>maturity; RIN                   | erythrocyte development                                            | 56   17                     | 42      |
| <i>darkorange</i>     | 805   | blood                                     | small molecule metabolic<br>process                                | 48   8.8                    | 36      |
| <i>lightsteelblue</i> | 77    | blood                                     | <i>none</i>                                                        | 48   8.2                    | 25.5    |
| <i>ivory</i>          | 451   | <i>none</i>                               | ER-associated ubiquitin-<br>dependent protein catabolic<br>process | 37   5.4                    | 25.5    |
| <i>thistle2</i>       | 834   | maturity                                  | tissue development                                                 | 29   3.6                    | 36.5    |
| <i>indianred4</i>     | 1180  | blood;<br>growth; liver;<br>maturity; RIN | membrane assembly                                                  | 28   2.8                    | 22      |
| <i>coral1</i>         | 689   | liver;<br>maturity; RIN                   | regulation of cell growth                                          | 25   5.2                    | 34      |
| <i>thistle3</i>       | 235   | blood; liver;<br>size                     | inorganic anion transmembrane<br>transport                         | 24   1.2                    | 21      |
| <i>skyblue1</i>       | 96    | RIN                                       | intracellular signal transduction                                  | 17   1.2                    | 21      |
| <i>darkmagenta</i>    | 1072  | blood;<br>maturity                        | single-organism metabolic<br>process                               | 13   5                      | 58      |
| <i>coral2</i>         | 200   | <i>none</i>                               | regulation of blood circulation                                    | 11   2.8                    | 14      |
| <i>grey</i>           | 5892  | <i>Not a module</i>                       | <i>Not a module</i>                                                | 9   2.4                     | -18     |
| <i>gold</i>           | 1k*   | <i>blood; size</i>                        | <i>Not a module</i>                                                | 4.8   0.38                  | -0.86   |
| <i>darkred</i>        | 10533 | blood                                     | protein ubiquitination                                             | 4.5   -0.55                 | 23.5    |

453

454 *Network construction and phenotype correlations: male Brook Charr*

455 Highly correlated male modules (eigengene correlation  $r > 0.75$ ) were merged, reducing 44 assigned male  
456 modules to 25 (Figure 2B; Figure S5B). Unlike the female network, a large proportion of the male data  
457 was unassigned. The unassigned *grey* module contained 72% of the analyzed transcripts (17,992  
458 transcripts). Assigned modules each contained between 54-1,732 transcripts (Table 2).

459 Phenotypic correlations with male module eigengenes were characterized (Figure S6). Similar to  
460 females, liver weight was highly correlated with modules including *darkgreen* ( $r = 0.53$ ) and *yellow* ( $r = -$   
461  $0.52$ ). Other highly correlated module-phenotype comparisons included osmolality change with  
462 *lightcyan1* ( $r = 0.52$ ), *yellow* and *steelblue* ( $r = -0.4$ ). Relative to the female comparisons, there were more  
463 modules strongly correlated with growth rate including *yellow* and *steelblue* ( $r < -0.39$ ), *darkgreen* and  
464 *turquoise* ( $r > 0.37$ ). Post-stress chloride was correlated with *ivory* and *lightcyan1* ( $r > 0.4$ ), *steelblue* and  
465 *tan* ( $r < -0.42$ ). Although modules from the female network did not show significant correlations with  
466 length and weight, male modules *darkgrey* and *green* were correlated with length ( $r > 0.42$ ). The male-  
467 specific phenotype sperm concentration was associated with *steelblue*, *brown* ( $r > 0.38$ ), and *lightcyan1* ( $r$   
468  $= -0.38$ ).

469 Several modules were enriched for immunity-related functions, including *darkmagenta* (defense  
470 response to virus) and *steelblue* (positive regulation of innate immune response) (Table 2 and Additional  
471 File S1). These two immune processes were found to belong to different modules that were not just  
472 inversely regulated, as this would put them in the same module given the unsigned network, but likely  
473 having somewhat decoupled regulation (Figure 5A), although the modules were still fairly correlated  
474 (Figure S5B). *Yellow*, *brown* and *green* modules were enriched for ribosomal or translation-related  
475 functions (Table 2). *Ivory*, the most sex- and species-specific male module (see below; Table 2; Figure  
476 5C) was enriched for neurogenesis in GO biological process, but also transcription factor activity in GO  
477 molecular function (Additional File S1). Other non-conserved, or lowly conserved modules (see below)  
478 were enriched for membrane activity including *darkgrey* (mitochondrial inner membrane) and *lightcyan1*  
479 (membrane organization; Additional File S1).

480

481 *Conservation of co-expression: male Brook Charr network*

482 Conservation of male modules in females was also evaluated. In contrast to what was observed in the  
483 conservation of female modules in males (see above), many of the male modules were weakly to  
484 moderately conserved in the females (Figure 4C). Highly conserved modules included *yellow* and *brown*  
485 (translation-related; preservation  $Z_{summary} \geq 34$ ; Figure 5B), *tan* ( $Z_{summary} = 43$ ), and *lightcyan*  
486 ( $Z_{summary} \geq 34$ ). Some modules were less conserved than even the randomly generated *gold* module  
487 (Table 2) and the unassigned *grey* module, including *green* (translation and size;  $Z_{summary} = 4.5$ ),

488 *darkgrey* (mitochondrial membrane; Zsummary = 1.8) and *ivory* (transcription factor activity; Zsummary  
 489 = 0.8; Figure 5C), suggesting the co-expression trends in these modules are specific to the males.  
 490

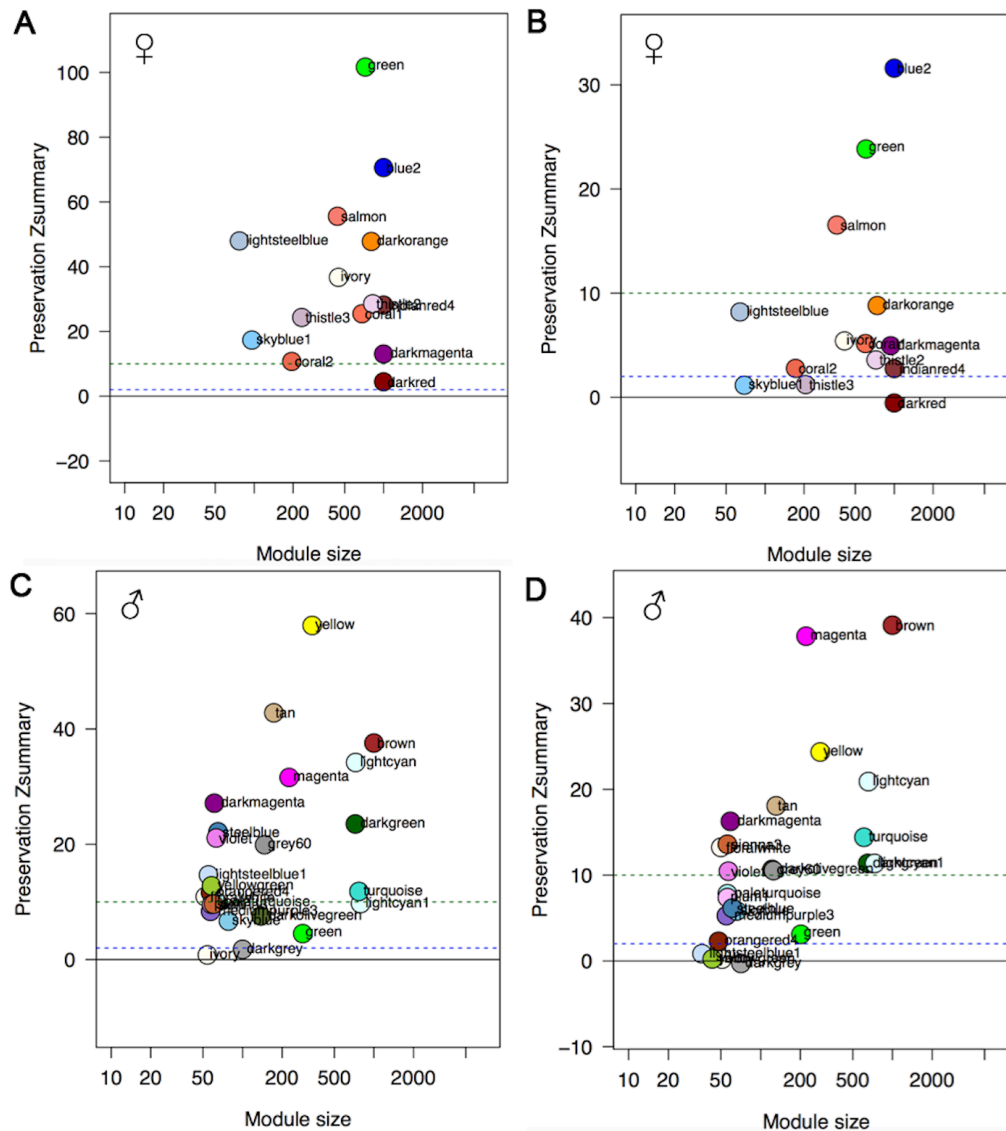

491  
 492 **Figure 4.** Module conservation Zsummary scores of Brook Charr female modules in (A) Brook Charr  
 493 males and (B) Arctic Charr males, and of Brook Charr male modules in (C) Brook Charr females and (D)  
 494 Arctic Charr males. Under the hatched blue line are non-conserved modules, between the hatched blue  
 495 and green lines are low to moderate conservation (Zsummary 2-10), and above the hatched green line are  
 496 strong evidence of conservation (Zsummary > 10). Most of the female modules had high conservation in  
 497 Brook Charr males except the darkred module. Many female modules were also moderately conserved in  
 498 male Arctic Charr, with some showing high conservation such as salmon, green and blue2. In the male  
 499 Brook Charr modules, many modules had moderate levels of conservation with several having low  
 500 conservation including ivory and darkgrey. The Arctic Charr data always showed lower conservation due  
 501 to a combination of factors including lower sample sizes, the use of a different species reference  
 502 transcriptome, species differences, and possibly slight environment or development differences.  
 503

504 Conservation of male Brook Charr modules was also explored in Arctic Charr males. Similar to  
505 that observed in the female modules, when a male Brook Charr module was conserved in female Brook  
506 Charr, it was also often conserved in male Arctic Charr (see similar ranking of conservation; Table 2;  
507 Figure 4D). Some modules, including *magenta* (response to endoplasmic reticulum stress) and *brown*  
508 (ribonucleoprotein complex biogenesis) were either equally or more conserved in the Arctic Charr males  
509 as they were in the Brook Charr females. This indicates that sufficient power is present in the Arctic  
510 Charr samples to identify conservation in modules from a separately generated network. Male Brook  
511 Charr modules that are highly or moderately conserved in female Brook Charr but not conserved in male  
512 Arctic Charr (e.g. *lightsteelblue1* and *yellowgreen*) may be conserved across sexes, but species-specific.  
513 However, this will need further data to characterize due to the caveats of the Arctic Charr data (see  
514 above).

#### 515 516 *Cross-tabulation comparisons of female and male modules*

517 Cross-tabulation was used to gain insight into the correspondence of modules and comparison of network  
518 topology between the sexes. Most importantly, 12 of the 25 male modules had more than 25% of their  
519 genes contained within the largest female module *darkred* that contained 10,533 transcripts (Additional  
520 File S2). This could be expected given the size of the *darkred* module, but this means that the genes from  
521 these male modules were often grouped together into one very large module in females. For instance, the  
522 female *darkred* module included 87% of the genes in male *darkmagenta* (virus defense response). Even  
523 though the adjacencies of the genes within male *darkmagenta* were conserved in females (preservation  
524  $Z_{summary} = 27$ ; Table 2), the grouping of these genes was specific to the topology of the male network.  
525 In other cases, female modules were made up of a large number of genes from a single male module. For  
526 example, the female module *lightsteelblue* (intracellular signal transduction) was comprised of a majority  
527 of genes (82%) from male *grey60*.

528 By contrast, 20 of the 25 assigned male modules each did not contain more than 10% of the genes  
529 from any one female module (Additional File S2). Therefore, the grouping of many male modules into  
530 the single module female *darkred* did not occur for the female modules. Instead, the genes within the  
531 female modules often were largely present in the unassigned *grey* module of the males (Additional File  
532 S2). This further indicates that the male network was less modular than the female network, as these  
533 specific genes from female modules were unassigned in the male network.

534  
535

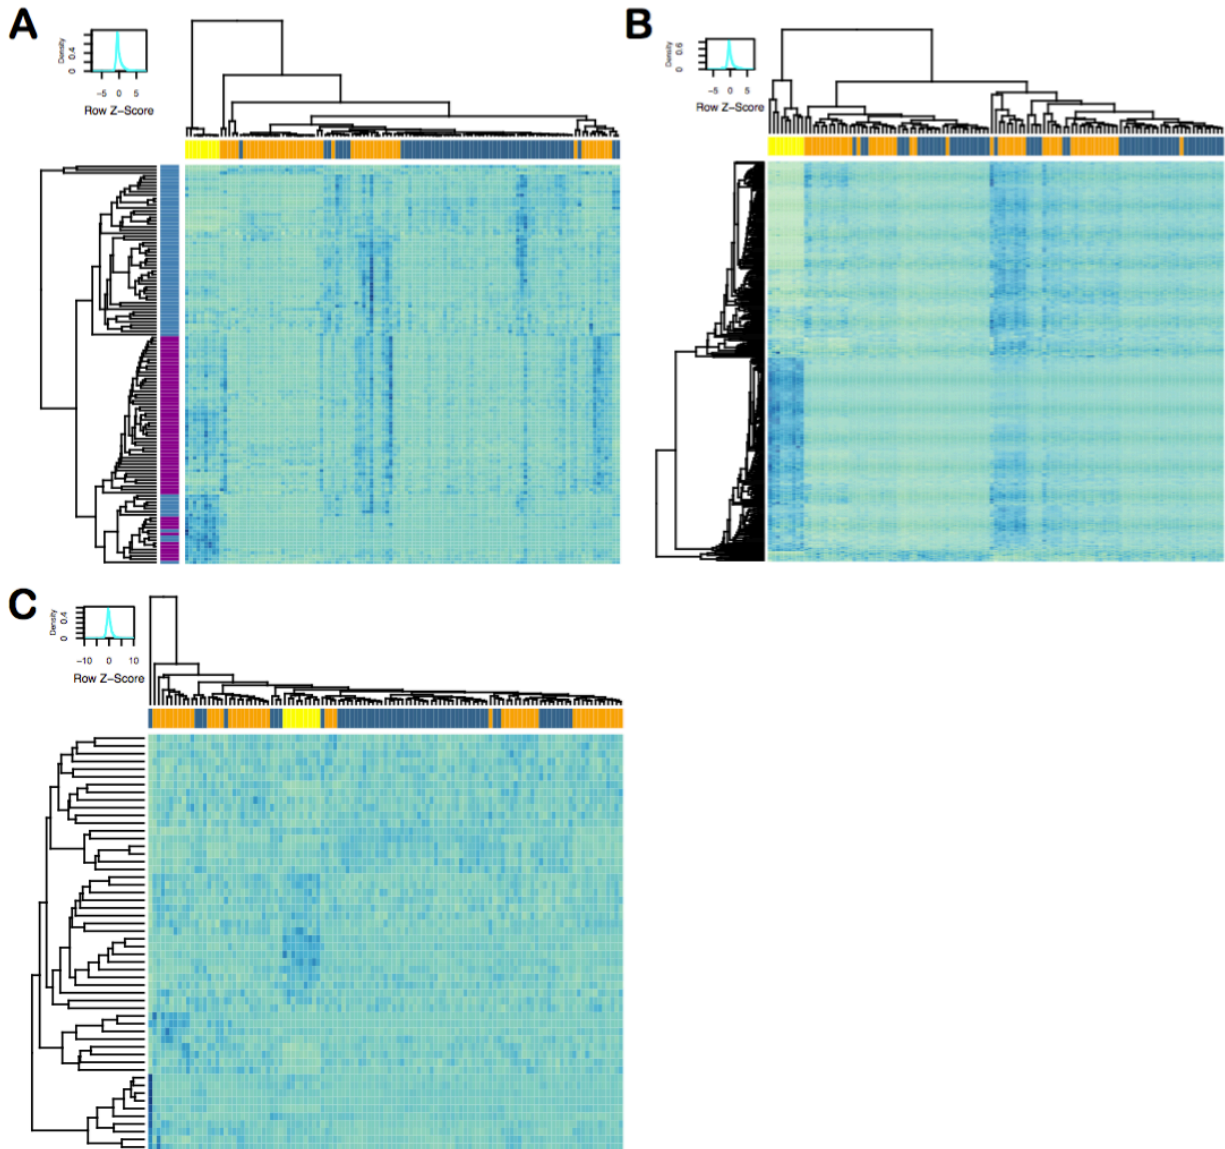

536

537 **Figure 5.** Heatmaps of gene expression of transcripts within (A) two immunity-related male clusters,  
538 *steelblue* and *darkmagenta*, which are related to innate immunity and innate antiviral immunity,  
539 respectively, (B) the conserved male module *yellow* (translation), and (C) the male-specific *ivory*  
540 (transcription factor activity). Samples are shown on the horizontal with Brook Charr females (orange),  
541 Brook Charr males (blue), and Arctic Charr males (in yellow). Genes from multiple modules in (A) are  
542 colored according to the module (*steelblue*, *darkmagenta*). The normalized expression values are shown  
543 within the heatmap. Genes within the modules are listed in Additional File S5.  
544

545 **Table 2.** Male modules with the number of transcripts within the module (n), the general category of  
 546 traits correlated with the module ( $p \leq 0.01$ ), the most significantly enriched Gene Ontology category  
 547 (Biol. Proc.), the Zsummary for preservation of the module in Brook Charr females (BC f) and Arctic  
 548 Charr males (AC m), as well as the identified module quality (robustness). Zsummary < 2 is not  
 549 conserved,  $2 < Zsummary < 10$  is moderately conserved, and  $> 10$  is conserved. The *grey* module  
 550 includes unassigned genes and the *gold* module is a random selection of 1000 genes from the assigned  
 551 modules for testing preservation metrics. Full module-trait correlations are shown in Figure S6, full GO  
 552 enrichment in Additional File 1, and expanded summaries of this table in Additional File S2.

| Module                 | n     | Traits                           | GO Enrichment (BP)                               | Preservation |       | Quality |
|------------------------|-------|----------------------------------|--------------------------------------------------|--------------|-------|---------|
|                        |       |                                  |                                                  | BC f         | AC m  |         |
| <i>yellow</i>          | 339   | blood; liver;<br>size            | translation                                      | 58           | 24    | 51      |
| <i>tan</i>             | 173   | blood; size                      | <i>none</i>                                      | 43           | 18    | 41.5    |
| <i>brown</i>           | 1732  | blood; sperm                     | ribonucleoprotein complex<br>biogenesis          | 38           | 39    | 72.5    |
| <i>lightcyan</i>       | 734   | blood; size                      | organic acid metabolic process                   | 34           | 21    | 69      |
| <i>magenta</i>         | 226   | <i>none</i>                      | response to endoplasmic<br>reticulum stress      | 32           | 38    | 45      |
| <i>darkmagenta</i>     | 61    | <i>none</i>                      | defense response to virus                        | 27           | 16    | 25.5    |
| <i>darkgreen</i>       | 724   | blood;<br>growth; liver;<br>size | <i>none</i>                                      | 24           | 11    | 58      |
| <i>steelblue</i>       | 65    | blood;<br>growth;<br>sperm       | positive regulation of innate<br>immune response | 22           | 6.2   | 26.5    |
| <i>violet</i>          | 64    | liver                            | sterol biosynthetic process                      | 21           | 10    | 29.5    |
| <i>grey60</i>          | 147   | <i>none</i>                      | secretion by cell                                | 20           | 11    | 39      |
| <i>lightsteelblue1</i> | 55    | <i>none</i>                      | <i>none</i>                                      | 15           | 0.85  | 23      |
| <i>yellowgreen</i>     | 61    | blood                            | <i>none</i>                                      | 13           | 0.24  | 24.5    |
| <i>turquoise</i>       | 783   | <i>none</i>                      | immune system process                            | 12           | 14    | 68.5    |
| <i>orangered4</i>      | 57    | sperm                            | regulation of apoptotic process                  | 12           | 2.3   | 26.5    |
| <i>floralwhite</i>     | 52    | <i>none</i>                      | glutathione metabolic process                    | 11           | 13    | 25      |
| <i>paleturquoise</i>   | 64    | blood                            | response to organonitrogen<br>compound           | 10           | 7.8   | 25.5    |
| <i>lightcyan1</i>      | 791   | blood; sperm                     | cytokinesis                                      | 9.7          | 11    | 67.5    |
| <i>sienna3</i>         | 61    | liver; size                      | extracellular structure<br>organization          | 9.6          | 14    | 26.5    |
| <i>plum1</i>           | 58    | <i>none</i>                      | <i>none</i>                                      | 9.6          | 7.4   | 23.5    |
| <i>mediumpurple3</i>   | 57    | size                             | ribonucleoprotein complex<br>assembly            | 8.4          | 5.3   | 20.5    |
| <i>darkolivegreen</i>  | 138   | blood                            | <i>none</i>                                      | 7.6          | 11    | 28.5    |
| <i>skyblue</i>         | 78    | RIN                              | regulation of transcription,<br>DNA-templated    | 6.7          | 5.8   | 28      |
| <i>grey</i>            | 17992 | <i>Not a module</i>              | <i>Not a module</i>                              | 5.5          | 2.3   | -14     |
| <i>gold</i>            | 1k*   | <i>Not a module</i>              | <i>Not a module</i>                              | 4.9          | 3.2   | -0.035  |
| <i>green</i>           | 334   | size                             | translation                                      | 4.5          | 3.1   | 39      |
| <i>darkgrey</i>        | 100   | size                             | small molecule metabolic<br>process              | 1.8          | -0.28 | 31.5    |
| <i>ivory</i>           | 54    | blood                            | neurogenesis                                     | 0.81         | 0.22  | 24      |

553



554 *Hub genes in modules of interest*

555 Hub genes are identified using module membership (MM) scores that estimate gene connectivity to other  
556 genes within the module (Additional Files S3 and S4). Importantly, the distribution of MM is continuous  
557 and there is no discrete change between a hub gene and a non-hub gene. Here we present the highest  
558 ranked hub genes for several modules from both the female and male networks that are of interest due to  
559 GO enrichment, module conservation or phenotypic correlation.

560 Female *lightsteelblue* was of interest due to conservation in the male network (77 transcripts;  
561 intracellular signal transduction), but hub genes (MM > 0.9) were often unannotated. The six of 15 that  
562 were annotated, included *selenium-binding protein*, several stonustoxin subunits (proteins with hemolytic  
563 activity), *estrogen-related receptor gamma*, and *NACHT, LRR and PYD domains-containing protein 12-  
564 like*. Several other transcripts, still with high MM (> 0.80), were annotated as *neoverrucotoxin subunit  
565 beta-like*, another toxin-related protein with hemolytic activity. Female *salmon* (449 transcripts;  
566 hemopoiesis) was also of interest as it was conserved in males. Hub genes from *salmon* had 53 transcripts  
567 with MM > 0.9, most of which were annotated, often with hemopoietic functions including *band 3* (anion  
568 transport protein in erythrocytes), *erythropoietin receptor* (promotes blood cell proliferation and prevents  
569 apoptosis), various hemoglobin subunits, and *5-aminolevulinate synthase* (involved in heme synthesis). A  
570 transcript annotated as the transcription regulator *Kruppel-like factor 4* also was in the top MM genes.  
571 The highest MM is *tubulin beta-6 chain-like*, which is a major constituent of microtubules.

572 For male modules, *ivory* was of interest due to enrichment for transcription factor activity, male-  
573 specificity of the module, and correlation with chloride levels. For this module, there were no genes with  
574 MM > 0.9. The highest MM transcripts included transcription regulators such as *frizzled-9* (FZD9) and  
575 *protein wnt* (WNT9) the ligand for the frizzled family of transmembrane receptors (MM = 0.79), the  
576 transcription factor *RAR-related orphan receptor gamma 2 protein* and *lysine-specific demethylase 4B  
577 (KDM4B)*, which plays a role in the histone code, and transcription activator *nuclear factor 1 A-type*.  
578 Although these genes related to transcription factor activity were all ranked high in MM, there were also  
579 other transcripts lower in MM rank that are also putatively involved in transcription regulation, including  
580 those annotated as putative zinc finger proteins, or related to the SOX family of transcription factors.  
581 Male *darkmagenta* was also of interest as it was highly conserved and enriched for innate viral immunity-  
582 related functions. Only four transcripts were MM > 0.9, but some of the top ranking MM transcripts were  
583 associated to the module function, including the most connected *probable ATP-dependent RNA helicase  
584 (DDX58/RIG-1; MM = 0.93)*, important for sensing viral infection and inducing type I interferons and  
585 pro-inflammatory cytokines, *interferon-induced protein with tetratricopeptide repeats 5* (IFIT5; MM =  
586 0.89), an interferon induced RNA-binding immunity protein, *galectin-3-binding protein A* (L3BPA; MM  
587 = 0.89), *sacsin* (SACS; MM = 0.88) and *probable E3 ubiquitin-protein ligase* (HERC6; MM = 0.84) both



588 involved in immunity in fish, and *signal transducer and activator of transcription 1-alpha/beta* (STAT1;  
589 MM = 0.83), a transcription activator that mediates responses to interferons. Male *steelblue* is of interest  
590 due to conservation and enrichment of immunity-related functions. Only one transcript had MM  $\geq$  0.9,  
591 *40S ribosomal protein S11-like*. However, other high-ranking hub genes included innate immunity-related  
592 genes, namely *C-type lectin domain family 4 member E* (CLC4E; MM = 0.86), *metalloreductase* (STEA4;  
593 MM = 0.86) involved in integrating inflammatory and metabolic responses. Similar to above, other lectin-  
594 related transcripts were also found lower in MM, including others annotated as *CLC4E* and as *leukocyte*  
595 *cell-derived chemotaxin-2* (LECT2), which has neutrophil chemotactic activity. Male *turquoise* was also  
596 of interest as it was enriched for immune system processes and had 17 hub genes, 11 of which were  
597 related to immune system processes. There were no correlated traits for this module. The interplay of  
598 these three different immune modules can be investigated by looking at module eigengene clustering  
599 (Figure S5B). The immune-related *steelblue* and *darkmagenta* modules had similarly clustering module  
600 eigengenes, and these two clustered separately from the *turquoise* module (see Figure S5B), suggesting a  
601 more distinct expression profile for *turquoise*. Male modules *yellow* (translation) and *brown* (translation)  
602 were among the most conserved across species and had correlations to phenotypes. The four hub genes of  
603 *yellow* all encode ribosomal proteins. *Brown* (related to plasma osmolality and sperm concentration) had  
604 all 22 hub genes annotated (Additional File S5). Of these hub genes, 19 were related to RNA metabolism  
605 and other metabolic processes. Two members of heat shock 70 kDa protein family members were  
606 included as hub genes in this module, *hsp4* and *hsp14*.

607

#### 608 *Overrepresentation of chromosomes in co-expression modules*

609 A single representative Brook Charr transcript per gene was conservatively identified based on alignment  
610 position on the Atlantic Salmon genome (see Methods). Of the 69,441 total Brook Charr transcripts in the  
611 reference transcriptome, 44,405 aligned to the Atlantic Salmon reference genome containing the main 29  
612 chromosomes and unplaced scaffolds. Probably due to the ancestral salmonid genome duplication, gene  
613 tandem duplications, and in some cases potentially due to mapping against both a chromosome and an  
614 unplaced scaffold, 5,111 of these transcripts aligned to more than one location, resulting in a total of  
615 49,516 alignments (MAPQ  $\geq$  30).

616 After keeping a single transcript per continuous alignment block on the reference genome (see  
617 Methods), a total of 21,237 uniquely located gene positions were identified over all Atlantic salmon  
618 scaffolds. For females, this included 20,140 unique transcripts, with 1,097 transcripts having two different  
619 locations on the reference. For males, this included 20,151 unique transcripts, with 1,086 transcripts  
620 having two different locations on the reference. Isolating transcripts to only the main 29 chromosomes of

621 Atlantic Salmon, not including all of the unplaced scaffolds, resulted in a total of 19,913 transcript  
622 locations on the 29 chromosomes in both sexes.

623 Of the 19,913 transcripts with chromosomal locations, 7,694 were from assigned modules, 2,330  
624 were in the unassigned grey module, and 9,889 were not in the top 25,000 most correlated genes from the  
625 female network, and thus were not included in module construction. From the male network, 2,830  
626 transcripts located to chromosomes were from assigned modules, 7,340 were in the unassigned grey  
627 module, and 9,743 were not in the top 25,000 most correlated genes. The proportions of these transcripts  
628 belonging to each chromosome in the 19,913 transcripts, and the proportions of the transcripts in each  
629 module were compared to identify significantly enriched chromosomes from different modules (see  
630 Figures 7A and 8A; Table S1 and S2).

631 Two of the 14 female modules (14%) showed overrepresentation from specific chromosomes ( $p <$   
632  $0.01$ ; Table S1; Figure 6A; all modules shown in Figure S7). The *green* module, enriched for translation  
633 activity, had 208 unique, positioned genes and these genes were overrepresented on chr26 (5% vs 2% in  
634 baseline;  $p = 0.005$ ). Of the ten unique genes from this module identified on chr26, six were annotated  
635 with translation-related functions (Additional File S3). This included genes annotated as *probable*  
636 *ribosomal biogenesis protein RLP24*, *60S acidic ribosomal protein P2*, *60S ribosomal protein L30*, *40S*  
637 *ribosomal protein S13* and *S17*, and *DNA-directed RNA polymerases I, II, and III subunit RPABC5*.  
638 Importantly, in this module, one transcript was aligned twice within the same chromosome and so was  
639 counted twice (see Methods), and this gene was not related to translation function. This was the only  
640 observed instance of an enriched chromosome having two alignments from the same transcript. The  
641 *salmon* module (hemopoiesis) had 169 positioned genes and 15 were positioned throughout chr20 (9%  
642 vs. 4% in baseline;  $p = 0.006$ ; Figure 6B). However, only two of the 15 genes had functions related to  
643 hemopoiesis, including *ankyrin-1*, involved in binding erythrocyte membrane protein band 4.2 to other  
644 membrane proteins and *flavin reductase*, involved in heme catabolism.

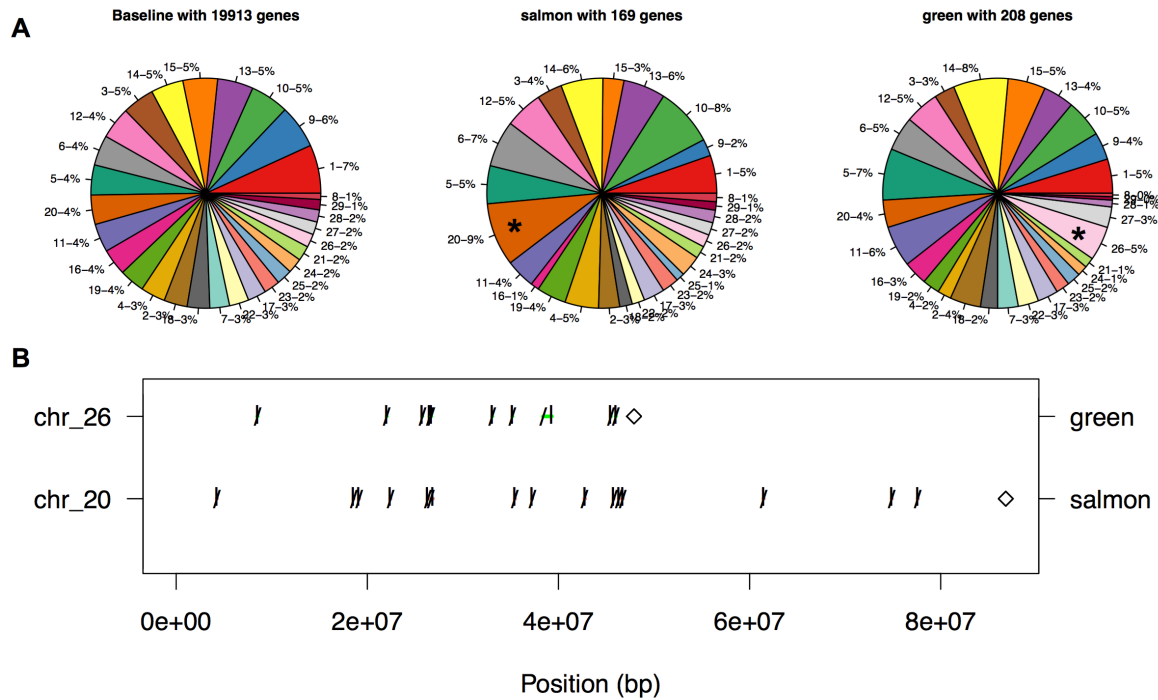

645

646 **Figure 6.** Chromosome overrepresentation evaluated within the female modules. The proportion of  
 647 transcripts per chromosome is shown (A) for the baseline (all expressed unique genes), the female green  
 648 module and the female salmon module. Significant overrepresentation of particular chromosomes is  
 649 represented by an asterisk within the pie chart ( $p \leq 0.01$ ). Positions of genes within the significantly  
 650 overrepresented chromosome/module combinations are shown in (B), with the name of the chromosome  
 651 on the first Y-axis and the module on the second Y-axis. Start and stop positions of genes are shown in  
 652 base pairs (bp) along the x-axis with the start shown by a vertical line and stop by a slight angle line, and  
 653 the end of the chromosome shown by a diamond. All female module chromosome proportions are shown  
 654 in Figure S7.

655 In males, nine of 27 (33%) modules had at least one overrepresented chromosome, and one  
 656 module (*yellowgreen*) had two overrepresented chromosomes (Figure 7A; all modules shown in Figure  
 657 S8). Of the 60 positioned genes in *yellow* (translation), five were from chr26 (8% vs. 2% in baseline;  $p =$   
 658 0.005). Considering that most of the genes in male *yellow* occur in female *green*, the observation that both  
 659 show enrichment for chr26 is not surprising. Similarly, all five of the genes from this module-  
 660 chromosome combination are related to ribosomal functions (see Additional File S3). Of the 349  
 661 positioned genes in *turquoise* (immune system process), 16 were from chr25 (5% vs. 2% in the baseline;  
 662  $p < 0.002$ ). Five of these 16 genes were related to immunity, including *G-protein coupled receptor 183*  
 663 (involved in chemotaxis of immune cells), *C-X-C chemokine receptor 4* (involved in mediating  
 664 inflammatory responses to lipopolysaccharide), *interleukin-1 receptor type 2* (reduces interleukin-1B  
 665 activity), *macrophage receptor MARCO* (involved in pattern recognition of bacteria), and *motile sperm*  
 666 *domain-containing protein 2* (involved in chemotactic migration of monocytes and neutrophils). Of the  
 667 21 positioned genes in *sienna3* (extracellular structure organization), three genes were from chr21 (14%

668 vs. 2%;  $p < 0.01$ ), all of which were related to the function of the module (*collagen alpha-3(VI) chain*,  
669 *collagen alpha-1(IV) chain*, and *fibronectin*). The rest of the enriched module-chromosome combinations  
670 in males were from smaller modules, including *steelblue* (innate immunity) with 19 positioned genes,  
671 four of which were in chr5 (21% vs. 4% in baseline;  $p = 0.007$ ), all with functions related to the module  
672 function, including *ribonuclease-like 3* (host defense and antibacterial), *leukocyte cell-derived*  
673 *chemotaxin-2* (neutrophil chemotactic activity), *saxitoxin and tetrodotoxin-binding protein 2* (toxin  
674 accumulation/secretion) and *c-type lectin domain family 4 member E* (cell surface receptor for ligands  
675 including damaged cells, fungi and mycobacterium, involved in secreting inflammatory cytokines).  
676 *Skyblue* (14 genes) had four genes from chr13 (29% vs. 5% in baseline;  $p = 0.005$ ), two of which were  
677 involved in transcription activity, for which the module was enriched (*zinc finger BED domain-*  
678 *containing protein 4* and *one cut domain family member 2*).

679 Interestingly, several of these enriched module-chromosome gene sets were weighted to one side  
680 of the chromosome in position. For example, the female *green* module had 9/10 genes in the second half  
681 of the chromosome (between 20M and 45Mbp; Figure 6B). Male chromosome-module combinations also  
682 were weighted to one side of the chromosome, such as *yellow*-chr26, *lightsteelblue*-chr18, *skyblue*-chr13,  
683 both *yellowgreen*-chr13 and *yellowgreen*-chr3, and *grey60*-chr3 (Figure 7B). Others, such as *steelblue-*  
684 *chr5*, *plum1*-chr6, *sienna3*-chr21 and *turquoise*-chr25 contained genes that were found throughout the  
685 chromosomes. This enrichment only to one side is probably due to the use of the non-focal reference  
686 genome. For those weighted to one side of the chromosome, specifically chr13 (i.e., Ssa13) and chr3 (i.e.,  
687 Ssa03), the chromosomes are not in the same fusion pattern in Brook Charr (Sutherland *et al.* 2016).  
688 Importantly, the *yellowgreen* module is enriched within chr13 on the distal end (i.e., Ssa13b) and within  
689 chr3 on the distal end (i.e. Ssa03b); Ssa13b corresponds to BC08b and Ssa03b corresponds to BC08a, and  
690 therefore, if a Brook Charr reference genome were to be used in this analysis, *yellowgreen* would be  
691 highly enriched within all of BC08.

692 Atlantic Salmon enriched chromosomes where module genes occur throughout the chromosome  
693 are often either ancestrally fused prior to the divergence of *Salmo* and *Salvelinus*, such as chr5 (i.e.,  
694 Ssa05) which corresponds to the fused BC07 (fusion 4.2-20.1 from Figure 4 of Sutherland *et al.* 2016), or  
695 are acrocentric chromosomes in both species, such as chr21 (i.e., Ssa21, corresponds to BC26) or chr25  
696 (i.e., Ssa25, corresponds to BC24). Some exceptions in the examples above exist, including chromosomes  
697 with genes found throughout that are in fact two acrocentric chromosomes in Brook Charr (e.g. chr20 or  
698 Ssa20 corresponds to acrocentric BC40 and BC25; and chr6 or Ssa06 corresponds to acrocentric BC14  
699 and BC31). Therefore, although trends observed here indicate chromosome-level co-expression and  
700 enrichment for specific modules in specific chromosomes, the trends would be stronger if a focal species  
701 reference genome was available.

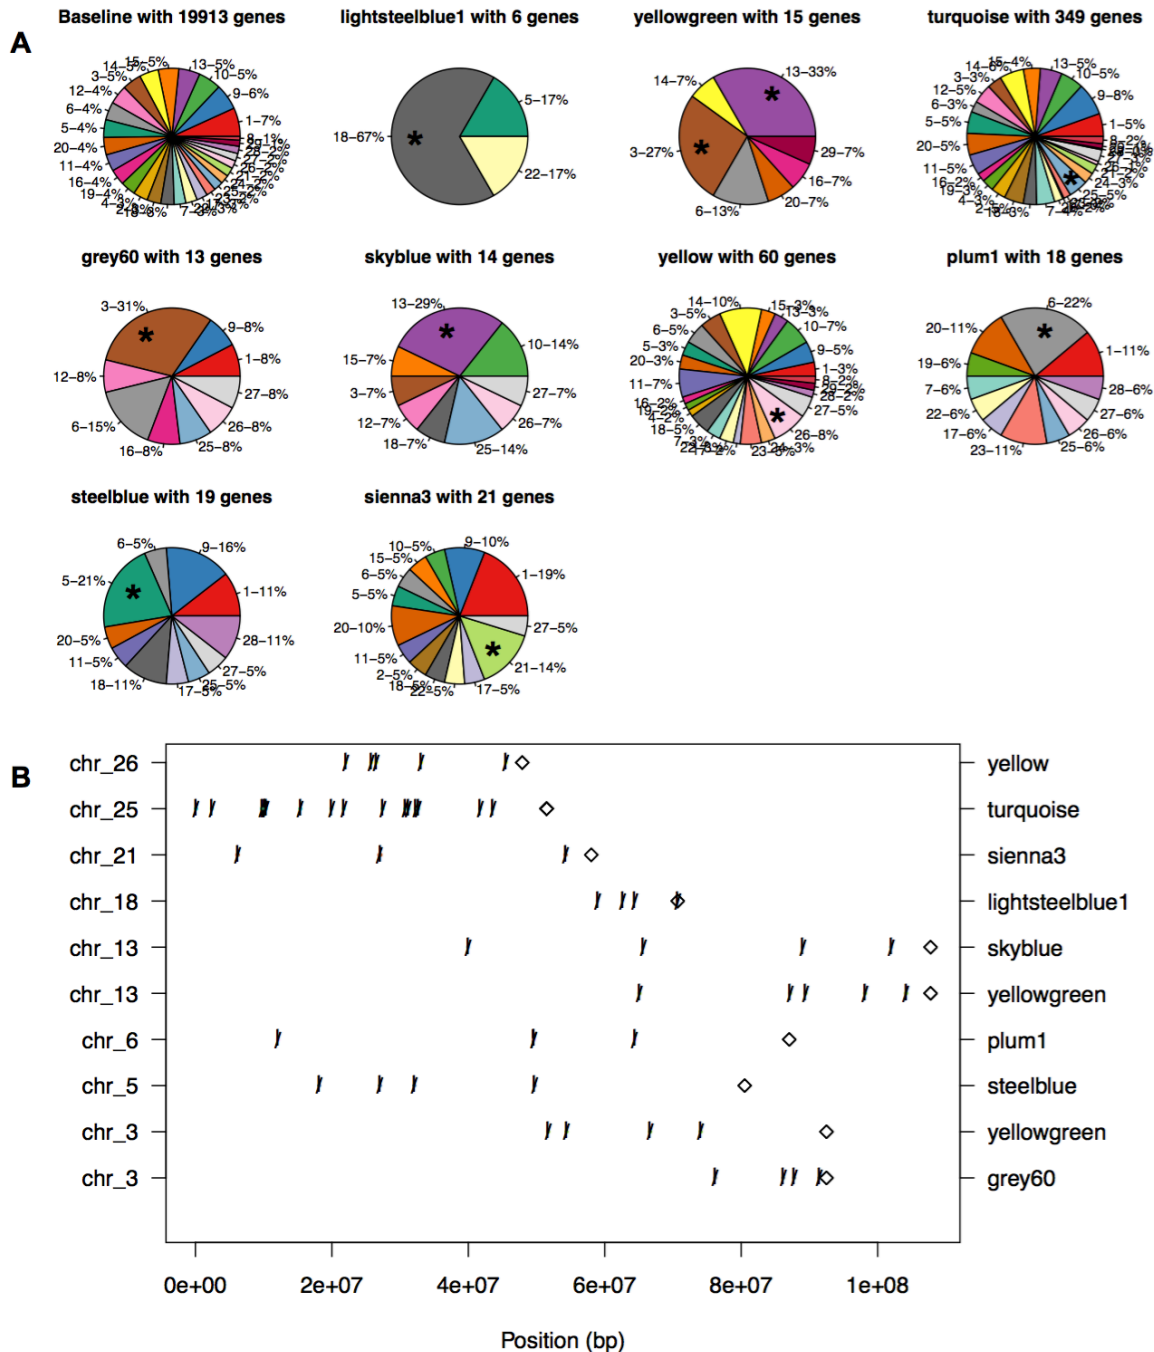

702

703 **Figure 7.** Chromosome overrepresentation evaluated within the male modules. The proportion of  
 704 transcripts per chromosome is shown (A) for the baseline (all expressed unique genes) and for the rest of  
 705 the modules with significant overrepresentation. Overrepresentation of particular chromosomes within  
 706 modules are represented by an asterisk within the pie chart ( $p \leq 0.01$ ). Positions of genes within the  
 707 significantly overrepresented chromosome/module combinations are shown in (B), with the name of the  
 708 chromosome on the first Y-axis and the module on the second. Start and stop positions of genes are  
 709 shown in base pairs (bp) along the x-axis with the start shown by a vertical line and stop by a slight angle  
 710 line, and the end of the chromosome shown by a diamond. All male module chromosome proportions are  
 711 shown in Figure S7.

712

## DISCUSSION

713 Gene co-expression produces complex phenotypes and may underlie key aspects of phenotypic evolution.  
714 Further, characterizing the regulatory structure in which genes respond provides valuable insight on  
715 organismal response to biotic and abiotic stimuli. Co-expressed genes may share regulatory elements,  
716 such as transcription factor binding sites (van Dam *et al.* 2017), which highlights the value of network  
717 analyses in characterizing these regulatory elements. The correlation of phenotypic variation with co-  
718 expressed genes provides further information on the function of specific modules, and can bring added  
719 information to other studies that use modules to classify samples based on gene expression.

720 In this study, we generated co-expression networks for both female and male Brook Charr liver  
721 transcriptomes during a reproductive period and shortly after all fish were exposed to an acute handling  
722 stress. We then evaluated module conservation in the opposite sex and in the congener Arctic Charr using  
723 adjacency comparisons. Our observations confirmed previous findings showing that co-expression  
724 patterns within most modules are conserved between sexes or closely related species (van Nas *et al.* 2009;  
725 Wong *et al.* 2014; Cheviron and Swanson 2017), but we also identified several sex-specific modules that  
726 provide insight on the evolution of gene expression and phenotypic variance, as well as being potentially  
727 involved in resolving sexual conflict through gene regulation (Thompson *et al.* 2015). For each module,  
728 we identified hub genes, evaluated functional enrichment and phenotypic correlations, as well as  
729 chromosomal positions of module genes to identify whether specific modules were overrepresented on  
730 specific chromosomes, thus providing information regarding the underlying mechanisms of regulation.  
731 Altogether, this provides a highly comprehensive analysis of the structure of the gene expression  
732 networks of a paleopolyploid non-model salmonid.

733

### 734 *Sexual dimorphism in co-expression networks and cross-species conservation*

735 The most striking result from an initial inspection of the transcriptome data is the large difference in  
736 modularity in the female and male Brook Charr networks. Although females had 76% of the most  
737 connected 25 k genes assigning to a module, males had only 28%, and the rest were grouped into the *grey*  
738 unassigned module. This may be related to the higher inter-individual variance in gene expression in  
739 females than in males (Figure 1). Since variance across samples in gene expression is needed to identify  
740 correlation among transcripts, the lower variance in males may have resulted in the observed lower  
741 modularity. Interestingly, if modules were built only in females and tested for conservation in males, this  
742 phenomenon may have not been noted, as the female modules often were given conserved statistics in  
743 males, but when modules were generated in males, many genes were not assigned to a module. Further,  
744 the generation of modules in the males identified many important modules that in the female network  
745 were all grouped together into the very large module *darkred*, which additionally shows the benefit of



746 generating networks in each sex independently. It will be valuable to inspect sex-specific module  
747 generation in other salmonids and in tissues other than liver to understand the generality of these sex  
748 differences.

749 Conserved modules between the sexes were often comprised of genes within pathways involved  
750 in conserved functions. For example, the most conserved modules between the sexes and species were  
751 involved in basic cellular processes involving many co-expressed subunits of a multiple subunit protein  
752 complex (e.g. translation). Additionally, immunity-related modules were also conserved between the  
753 sexes, and co-expression is often observed in these response pathways (Sutherland *et al.* 2014b).  
754 Considering the complexity of these responses and the importance of this function, it is not surprising that  
755 immunity modules are conserved. One exception to the sex conservation of translation-related modules  
756 was the male *green* module, which was more male-specific, and interestingly was associated with length  
757 and weight in males, whereas no female modules had significant associations to these traits. The male  
758 module *darkgrey* was also correlated with length and weight and was not conserved in females. Most  
759 notably, the male module *ivory*, which was correlated with blood osmolality and chloride levels, was  
760 highly male-specific, enriched for transcription factor activity, and contained many putative transcription  
761 factors as hub genes, including several genes from the *wnt* protein family. Wnt signaling is associated  
762 with gonad differentiation and shows sex-specific expression in several studies in mammals and fish,  
763 (Vainio *et al.* 1999; Nicol and Guiguen 2011; Sreenivasan *et al.* 2014; Böhne *et al.* 2014). Since  
764 transcription factor activity is often different among cell types, species, or sexes, this module may contain  
765 some specific features that contribute to sexual dimorphism of the liver. This may indicate that sex  
766 differences in liver tissue may be generated via similar mechanisms operating in the gonads, although to  
767 confirm this, more detailed studies are needed. The sex-specific modules identified here may provide  
768 insight into mechanisms of gene regulation solving issues of sexual antagonism.

769 The presence of sex-specific modules in the liver may be partly explained by sex hormones  
770 produced in the gonads, as they have been shown to regulate a significant proportion of the liver  
771 transcriptome in mouse (van Nas *et al.* 2009). In fish, the liver has partially diverged functions between  
772 the sexes, as several oocyte precursor proteins are produced in the liver in females (Qiao *et al.* 2016),  
773 which may explain some of the differences between sexes observed here. Some of the strongest  
774 associations of female modules were to maturity index. Maturity index is affected by sex hormones such  
775 as estradiol, which controls reproduction in fish (Garcia-Reyero *et al.* 2018). Therefore, even though most  
776 of the network modules were conserved in the opposite sex, phenotypic differences between the sexes are  
777 reflected in the liver network differences profiled here.

778 The ranking of module conservation levels in both the opposite sex and in Arctic Charr was often  
779 similar, suggesting evolutionary conservation for many gene co-expression modules. Even with the lower



780 sample size in Arctic Charr, conservation was identified for specific modules. Among the most conserved  
781 male Brook Charr modules in Arctic Charr with significant phenotype correlations were *brown*, *magenta*,  
782 *yellow*, and *turquoise*. *Yellow* and *turquoise* were correlated with growth rate, while *brown* was correlated  
783 with sperm concentration and plasma osmolality. Considering this identified conservation, hub genes  
784 from these modules may be good candidates as genes with conserved roles in the regulation of growth  
785 and sperm concentration in male salmonids. *Magenta* was enriched for endoplasmic reticulum stress and  
786 protein folding, also indicating the potential value of hub genes within this module to study responses to  
787 stress. The conserved *turquoise* module was enriched for immune response, and marginally associated  
788 with growth ( $p = 0.05$ ), and therefore hub genes of this module may be relevant for studying  
789 evolutionarily conserved associations between immunity and growth, which are known to occur in a  
790 trade-off if energy supply is limited.

791  
792 *Modules separated by immune response type*

793 Separate modules were identified for immune functions involving innate antiviral genes (male  
794 *darkmagenta*) and innate immunity C-type lectins (male *steelblue*). This is of large interest considering  
795 that these types of immune responses have been observed as responding inversely to different agents, with  
796 pathogen recognition receptors (e.g. C-type lectins) potentially involved in ectoparasite defense  
797 (Sutherland *et al.* 2014b) and being up-regulated during out-migration of steelhead trout *Oncorhynchus*  
798 *mykiss* smolts (Sutherland *et al.* 2014a). In both of these observations, innate antiviral genes were  
799 suppressed. Alternately, antiviral genes were overexpressed in non-migrating fish of the same species,  
800 and were down-regulated in Pink Salmon *O. gorbuscha* infected with salmon lice relative to controls.  
801 Even if the genes are not the same between these studies and ours (i.e., no 1:1 association of orthologs has  
802 been done for these datasets), the observation of similar functions in separate, but related, modules in the  
803 present study may indicate that these functions are hardwired into different modules given that no known  
804 infection is occurring within these samples. Importantly, in the present study, unsigned networks were  
805 used, and therefore if the two immune response types were completely inversely regulated, they would  
806 belong to the same module, which was not observed here. Therefore they are probably more independent  
807 and not completely under the same regulatory control. This is a new observation in the regulation of these  
808 different immune system processes in salmon, and is a highly important avenue for further study in  
809 salmonids given the relevance of these genes to immunity against pathogens, and the potential response  
810 outcomes of co-infection occurring between parasitic and viral agents in nature.

811 The immune response modules observed here (i.e. male *darkmagenta*, *steelblue*, and *turquoise*)  
812 were all considered as highly conserved between the sexes and moderately to highly conserved in Arctic  
813 Charr. It will be valuable to see if these three modules or the genes found within them have conserved

814 expression patterns in other species as these may have important roles in defense responses. It is possible  
815 that the co-expression viewed in these modules comes from the occurrence of a specific cell type that is  
816 present in different levels in the sampled tissue in different individuals. Single-cell RNA-sequencing of  
817 immune cells, or *in situ* gene expression hybridization techniques could address some of these questions.  
818 Further, it is valuable to use a microbe profiling platform alongside transcriptome studies of wild sampled  
819 individuals to best understand co-infection details (e.g. Miller *et al.* 2016). Nonetheless, these  
820 observations will be strengthened when additional analyses are conducted with a broader range of species,  
821 once orthologs are identified among the species.

822

### 823 *Module genes overrepresented on specific chromosomes*

824 Although not structured in operons like prokaryotic genomes, eukaryotic genomes are also known to  
825 show clustering of functionally related genes, which can be observed at multiple levels: intra-  
826 chromosomally (i.e. clustered by distance within a chromosome) (Santoni *et al.* 2013), inter-  
827 chromosomally (i.e. distributed on fewer chromosomes than expected by chance), and within 3D contact  
828 space with segments of other chromosomes within a nucleus (Thévenin *et al.* 2014). Co-localization in  
829 such a manner may allow for expression of genes within transcription factories in which ribosomes are  
830 concentrated, or where chromatin is opened (Thévenin *et al.* 2014). Eukaryotic genes from similar  
831 genomic location can show correlated expression profiles even when unrelated by function (Ghanbarian  
832 and Hurst 2015). In fact, this co-expression of non-related genes due to genomic location has been  
833 suggested to potentially result in spurious positive co-expression at low levels of correlation, where only  
834 higher-level correlation co-expression is found to contain genes belonging to the same GO classes  
835 (Batada *et al.* 2007). Co-expression of unrelated genes, either at an immediate proximity (< 100 kb) or at  
836 longer distances, may be due to chromatin dynamics resulting in a neutral shift in expression of  
837 neighbouring genes “piggybacking” selective changes to a focal gene (Ghanbarian and Hurst 2015).  
838 Enrichment within a specific chromosome is only one component of profiling these dynamics, but  
839 provides a starting point for the analysis.

840 Although in general the co-expression modules were not concentrated into specific chromosomes,  
841 some overrepresentation was observed. For example, enrichment of genes related to the module function  
842 were observed for female *green* (translation) and *male* turquoise (immunity), *sienna3* (extracellular  
843 matrix), *steelblue* (innate immunity), and *skyblue* (transcription activity). Although these few examples  
844 are interesting, the generally low proportion of overrepresentation suggests that chromosomal enrichment  
845 is probably not a major driver of co-expression patterns in modules identified here. However, Hi-C  
846 chromosome maps are not available for salmonids, and so this additional level of proximity cannot be yet  
847 evaluated in this system. Nonetheless, this work identifies coexpressed genes related to enriched module

848 functions that are overrepresented on specific chromosomes, giving evidence for clustering of  
849 functionally and transcriptionally related genes, which is an important finding and will be valuable to  
850 consider in future studies identifying co-expressed or differentially regulated panels of response genes.  
851 Interestingly, the sex-specific modules in the male (i.e., *green*, *darkgrey*, *ivory*) were not found to be  
852 overrepresented on the corresponding Atlantic Salmon chromosome (Ssa09a) to the Brook Charr sex  
853 chromosome (BC35) here, suggesting that the maintenance of this sexual dimorphic gene regulation is not  
854 due to sequestration of these genes on the sex chromosome but rather due to different regulatory  
855 architecture.

856 The discovery of enrichment of the male module *yellowgreen* across the second arm of two  
857 different chromosomes in Atlantic Salmon, which in Brook Charr are fused into a single chromosome is  
858 an important observation. If co-expression of this module for genes from throughout the Brook Charr  
859 chromosome is equally conserved in Atlantic Salmon, it would indicate that chromosomal proximity may  
860 matter, but belonging to different chromosomes also allows for co-expression. If co-expression for this  
861 module is stronger in Brook Charr, then it may suggest that the fusion of the two chromosome arms  
862 matters for co-expression, thus indicating relevance for chromosome fusions and fissions to gene  
863 regulation. Additional observations of a single module enriched across an entire chromosome in Atlantic  
864 Salmon that was in fact two acrocentric chromosomes in Brook Charr (e.g. *salmon* module enriched on  
865 chromosome Ssa20) reduces the likelihood of fused chromosomes enabling higher co-expression.  
866 Nonetheless, these will be important questions to investigate as other transcriptome datasets are generated  
867 within salmonids, and orthologs between species are identified.

868

#### 869 *Future comparative approaches*

870 The lack of large effect factors on the data within each sex, for example a treatment regime specific to  
871 groups of samples, or contrasting conditions permitted the characterization of the reproductive, post-acute  
872 stress response state underlying co-expression modules. Further, the use of all full-sib offspring is  
873 expected to remove a large amount of variation that could occur in a similar analysis of outbred  
874 individuals. This enabled the generation of networks expected to be largely driven by individual variance  
875 in allelic states, slight variances in development, or stochastic inter-individual differences that occur  
876 through other biological phenomena such as epigenetic imprinting or feed acquisition. The current dataset  
877 fulfills all of the suggested requirements for a successful network analysis including more than 20  
878 samples per condition and > 10M reads per sample (Ballouz *et al.* 2015). For these reasons, this dataset is  
879 optimal for understanding the architecture of gene expression and for applying an expression QTL  
880 analysis, as these genetic factors are among the only influences expected to be influencing transcription  
881 difference among individuals here. Now that hub genes are identified, eQTL investigations can use

882 module gene connectivity information to link network metrics to eQTL effect sizes (Mähler *et al.* 2017).  
883 The dataset presented here will also be useful for investigating relationships between cis and trans eQTL  
884 with allele-specific expression while considering the co-expression context of the specific genes explored,  
885 their positions within the modules, and the general functions of the modules to which they are assigned.  
886 Collectively this will improve our understanding of the selective constraints on gene expression  
887 regulation as well as the evolution of species-specific or conserved phenotypes.

888 As comparable datasets are produced in other salmonids, it will be valuable to identify whether  
889 the conserved modules are conserved outside of the genus *Salvelinus*. However, importantly this will  
890 require identification of 1:1 orthologs among the species, which would enable cross-species analyses.  
891 Salmonid ortholog identification across reference transcriptomes has recently been conducted for Atlantic  
892 Salmon, Brown Trout *Salmo trutta*, Arctic Charr, and European Whitefish *Coregonus lavaretus*, which  
893 also included identification of paralogs (Carruthers *et al.* 2018). This type of approach, combined with  
894 non-redundant reference transcriptomes will be invaluable in future studies to enable cross species  
895 comparisons. If modules are largely conserved between species, as our study suggests within *Salvelinus*  
896 liver, this would indicate that large-scale rewiring of baseline transcription networks has not occurred  
897 since the base of the lineage. The largest amount of rediploidization is thought to have occurred in the  
898 salmonids at the base of the lineage (Kodama *et al.* 2014; Lien *et al.* 2016), although a substantial  
899 proportion of ohnologs experienced lineage-specific rediploidization post-speciation events later in  
900 evolutionary time (Robertson *et al.* 2017). Given the impact of less-permanent regulatory mechanisms  
901 such as epigenetic control in regulating gene expression, one could expect large lineage specific changes  
902 in co-expression networks. The impact of the genome duplication and rediploidization on transcriptome  
903 networks, including lineage specific changes are important avenues for future study.

904

## 905 CONCLUSIONS

906 The co-expression networks of the liver tissue of female and male Brook Charr in a reproductive season  
907 shortly after an acute handling stressor were extensively characterized in the present study for correlated  
908 phenotypes, enriched gene functions, hub genes, conservation in the opposite sex or in the closely related  
909 Arctic Charr, and in terms of chromosomal location of module genes. This study supports previous  
910 observations of moderate to high conservation of modules between sexes and closely related species.  
911 Highly conserved modules were involved in basic cellular functions and immune functions. Sex-specific  
912 modules were enriched for transcription factor activities and associated with sex-specific or sexually  
913 antagonistic phenotypes, such as body size. Lower modularity was identified in males, likely explained by  
914 less inter-individual variance in the transcriptome. Our results on different immune system response types  
915 suggest not only the potential for inverse regulation but also decoupled regulation, which has implications

916 for responses to co-infections and requires further study. This work found evidence for functionally  
917 related genes co-expressed and co-located on specific chromosomes, identifying relevance of genomic  
918 location on co-expression regulatory dynamics. The relevance of chromosome arm fusions in co-  
919 expression dynamics merits further investigation. In addition to providing new insights on the underlying  
920 structure of transcription regulation in the salmonid genus *Salvelinus*, this is also a low-noise, high sample  
921 size dataset where expression patterns are putatively driven by slight variations in allelic combinations  
922 and stochastic minor differences in development, and will subsequently be a valuable resource for  
923 identifying eQTL while considering the co-expression network positions of genes.

924

## 925 **DATA ACCESSIBILITY**

926 Brook Charr Phylofish transcriptome assembly (Pasquier *et al.* 2016)

927 <http://phylofish.sigenae.org/ngspipelines/#!/NGSpipelines/Salvelinus%20fontinalis>

928 Atlantic Salmon genome assembly (Lien *et al.* 2016)

929 [https://www.ncbi.nlm.nih.gov/assembly/GCF\\_000233375.1](https://www.ncbi.nlm.nih.gov/assembly/GCF_000233375.1)

930 Complete documented bioinformatics pipeline: [https://github.com/bensutherland/sfon\\_wgcna](https://github.com/bensutherland/sfon_wgcna)

931

## 932 **SUPPLEMENTAL INFORMATION**

933 **Supplemental Results.** Additional figures and tables that support the main text.

934 **Additional File S1.** All enrichment analyses for Gene Ontology biological process and molecular  
935 function categories for all results with five or more genes and with an enrichment  $p \leq 0.01$ .

936 **Additional File S2.** Overview table for female and male modules, including module size, trait  
937 association, GO enrichment, preservation Zsummary and medianRank, and cross-tabulation results.

938 **Additional File S3.** Transcripts and annotation for each overrepresented module-chromosome  
939 combination for female and male networks ( $p \leq 0.01$ ). Genes with functions related to the function of the  
940 module are in bold text.

941 **Additional File S4.** Female genes in modules with gene significance and module membership values.

942 **Additional File S5.** Male genes in modules with gene significance and module membership values.

943

## ACKNOWLEDGEMENTS

944 Thanks to Guillaume Côté for laboratory assistance, Jérémy Le Luyer for discussions about WGCNA,  
945 Eric Normandeau for discussion on gene annotation, Yann Guiguen for discussion on details of  
946 transcriptome assembly, and Aimee-Lee Houde for comments on the manuscript. This work was funded  
947 by a Fonds de Recherche du Québec (FRQ) Nature et Technologies research grant awarded to Céline  
948 Audet, Louis Bernatchez, and Nadia Aubin-Horth; a grant from the Société de Recherche et de  
949 Développement en Aquaculture Continentale (SORDAC) awarded to L.B. and C.A. J.M.P. is supported  
950 by the Finnish Cultural Foundation. During this work, B.J.G.S. was supported first by a Natural Sciences  
951 and Engineering Research Council of Canada postdoctoral fellowship and subsequently by an FRQ Santé  
952 postdoctoral fellowship.

953

## 954 References

- 955 Allendorf F. W., Thorgaard G. H., 1984 Tetraploidy and the evolution of salmonid fishes. In: Turner BJ  
956 (Ed.), *Evolutionary genetics of fishes*, Plenum Publishing Corporation, New York, pp. 1–53.
- 957 Anttila K., Lewis M., Prokkola J. M., Kanerva M., Seppänen E., Kolari I., Nikinmaa M., 2015 Warm  
958 acclimation and oxygen depletion induce species-specific responses in salmonids. *J. Exp. Biol.* **218**:  
959 1471–1477.
- 960 Ballouz S., Verleyen W., Gillis J., 2015 Guidance for RNA-seq co-expression network construction and  
961 analysis: safety in numbers. *Bioinformatics* **31**: 2123–2130.
- 962 Barson N. J., Aykanat T., Hindar K., Baranski M., 2015 Sex-dependent dominance at a single locus  
963 maintains variation in age at maturity in salmon. *Nature* **528**: 405–408.
- 964 Batada N. N., Urrutia A. O., Hurst L. D., 2007 Chromatin remodelling is a major source of coexpression  
965 of linked genes in yeast. *Trends Genet.* **23**: 480–484.
- 966 Blackmon H., Brandvain Y., 2017 Long-term fragility of Y chromosomes is dominated by short-term  
967 resolution of sexual antagonism. *Genetics: genetics.300382.2017–9*.
- 968 Bolger A. M., Lohse M., Usadel B., 2014 Trimmomatic: a flexible trimmer for Illumina sequence data.  
969 *Bioinformatics* **30**: 2114–2120.
- 970 Böhne A., Sengstag T., Salzburger W., 2014 Comparative transcriptomics in East African Cichlids  
971 reveals sex- and species-specific expression and new candidates for sex differentiation in fishes.  
972 *Genome Biology and Evolution* **6**: 2567–2585.
- 973 Bush W. S., Moore J. H., 2012 Chapter 11: Genome-Wide Association Studies. *PLoS Comput Biol* **8**:  
974 e1002822.
- 975 Carruthers M., Yurchenko A. A., Augley J. J., Adams C. E., Herzyk P., Elmer K. R., 2018 *De novo*  
976 transcriptome assembly, annotation and comparison of four ecological and evolutionary model  
977 salmonid fish species. *BMC Genomics* **19**: 32.



- 978 Cheviron Z. A., Swanson D. L., 2017 Comparative transcriptomics of seasonal phenotypic flexibility in  
979 two North American songbirds. *Integr. Comp. Biol.* **57**: 1040–1054.
- 980 Crête-Lafrenière A., Weir L. K., Bernatchez L., 2012 Framing the Salmonidae family phylogenetic  
981 portrait: a more complete picture from increased taxon sampling. *PLoS ONE* **7**: e46662.
- 982 Ellegren H., Parsch J., 2007 The evolution of sex-biased genes and sex-biased gene expression. *Nat Rev*  
983 *Genet* **8**: 689–698.
- 984 Filteau M., Pavey S. A., St-Cyr J., Bernatchez L., 2013 Gene coexpression networks reveal key drivers of  
985 phenotypic divergence in Lake Whitefish. *Molecular Biology and Evolution* **30**: 1384–1396.
- 986 Gaiteri C., Ding Y., French B., Tseng G. C., Sibille E., 2014 Beyond modules and hubs: the potential of  
987 gene coexpression networks for investigating molecular mechanisms of complex brain disorders.  
988 *Genes Brain Behav.* **13**: 13–24.
- 989 Garcia-Reyero N., Jayasinghe B. S., Kroll K. J., Sabo-Attwood T., Denslow N. D., 2018 Estrogen  
990 signaling through both membrane and nuclear receptors in the liver of Fathead Minnow. *General and*  
991 *Comparative Endocrinology* **257**: 50–66.
- 992 Ghanbarian A. T., Hurst L. D., 2015 Neighboring genes show correlated evolution in gene expression.  
993 *Molecular Biology and Evolution* **32**: 1748–1766.
- 994 Gillis J., Pavlidis P., 2012 “Guilt by association” is the exception rather than the rule in gene networks. (A  
995 Rzhetsky, Ed.). *PLoS Comput Biol* **8**: e1002444.
- 996 Haas B. J., Papanicolaou A., Yassour M., Grabherr M., Blood P. D., Bowden J., Couger M. B., Eccles D.,  
997 Li B., Lieber M., MacManes M. D., Ott M., Orvis J., Pochet N., Strozzi F., Weeks N., Westerman R.,  
998 William T., Dewey C. N., Henschel R., LeDuc R. D., Friedman N., Regev A., 2013 *De novo*  
999 transcript sequence reconstruction from RNA-seq using the Trinity platform for reference generation  
1000 and analysis. *Nat Protoc* **8**: 1494–1512.
- 1001 Horreo J. L., 2017 Revisiting the mitogenomic phylogeny of Salmoninae: new insights thanks to recent  
1002 sequencing advances. *PeerJ* **5**: e3828–10.
- 1003 Huang D. W., Sherman B. T., Lempicki R. A., 2009 Systematic and integrative analysis of large gene  
1004 lists using DAVID bioinformatics resources. *Nat Protoc* **4**: 44–57.
- 1005 Kodama M., Briec M. S. O., Devlin R. H., Hard J. J., Naish K. A., 2014 Comparative mapping between  
1006 Coho Salmon (*Oncorhynchus kisutch*) and three other salmonids suggests a role for chromosomal  
1007 rearrangements in the retention of duplicated regions following a whole genome duplication event.  
1008 *G3 - Genes|Genomes|Genetics* **4**: 1717–1730.
- 1009 Langfelder P., Horvath S., 2008 WGCNA: an R package for weighted correlation network analysis. *BMC*  
1010 *Bioinformatics* **9**: 559.
- 1011 Langfelder P., Horvath S., 2012 Fast R functions for robust correlations and hierarchical clustering. *J.*  
1012 *Stat. Soft.* **46**: 1–17.
- 1013 Langfelder P., Luo R., Oldham M. C., Horvath S., 2011 Is my network module preserved and  
1014 reproducible? (PE Bourne, Ed.). *PLoS Comput Biol* **7**: e1001057.
- 1015 Langfelder P., Mischel P. S., Horvath S., 2013 When is hub gene selection better than standard meta-  
1016 analysis? (T Ravasi, Ed.). *PLoS ONE* **8**: e61505.



- 1017 Langmead B., Salzberg S. L., 2012 Fast gapped-read alignment with Bowtie 2. *Nat Meth* **9**: 357–359.
- 1018 Li H., Handsaker B., Wysoker A., Fennell T., Ruan J., Homer N., Marth G., Abecasis G., Durbin R., 1000  
1019 Genome Project Data Processing Subgroup, 2009 The Sequence Alignment/Map format and  
1020 SAMtools. *Bioinformatics* **25**: 2078–2079.
- 1021 Li W., Godzik A., 2006 CD-HIT: a fast program for clustering and comparing large sets of protein or  
1022 nucleotide sequences. *Bioinformatics* **22**: 1658–1659.
- 1023 Lien S., Koop B. F., Sandve S. R., Miller J. R., Kent M. P., Nome T., Hvidsten T. R., Leong J. S.,  
1024 Minkley D. R., Zimin A., Grammes F., Grove H., Gjuvslund A., Walenz B., Hermansen R. A.,  
1025 Schalburg von K., Rondeau E. B., Di Genova A., Samy J. K. A., Olav Vik J., Vigeland M. D., Caler  
1026 L., Grimholt U., Jentoft S., Våge D. I., de Jong P., Moen T., Baranski M., Palti Y., Smith D. R.,  
1027 Yorke J. A., Nederbragt A. J., Tooming-Klunderud A., Jakobsen K. S., Jiang X., Fan D., Hu Y.,  
1028 Liberles D. A., Vidal R., Iturra P., Jones S. J. M., Jonassen I., Maass A., Omholt S. W., Davidson W.  
1029 S., 2016 The Atlantic Salmon genome provides insights into rediploidization. *Nature* **533**: 200–205.
- 1030 Mackay T. F., 2001 The genetic architecture of quantitative traits. *Annu. Rev. Genet.* **35**: 303–339.
- 1031 Mackay T. F. C., Stone E. A., Ayroles J. F., 2009 The genetics of quantitative traits: challenges and  
1032 prospects. *Nat Rev Genet* **10**: 565–577.
- 1033 MacManes M. D., 2014 On the optimal trimming of high-throughput mRNA sequence data. *Front. Genet.*  
1034 **5**: 13.
- 1035 Macqueen D. J., Johnston I. A., 2014 A well-constrained estimate for the timing of the salmonid whole  
1036 genome duplication reveals major decoupling from species diversification. *Proceedings of the Royal  
1037 Society B: Biological Sciences* **281**: 20132881–20132881.
- 1038 Mähler N., Wang J., Terebieniec B. K., Ingvarsson P. K., Street N. R., Hvidsten T. R., 2017 Gene co-  
1039 expression network connectivity is an important determinant of selective constraint. (NM Springer,  
1040 Ed.). *PLoS Genet* **13**: e1006402.
- 1041 Miller K. M., Gardner I. A., Vanderstichel R., Burnley T., Li S., Tabata A., Kaukinen K. H., Ming T. J.,  
1042 Ginther N. G., 2016 *Report on the performance evaluation of the Fluidigm BioMark platform for  
1043 high-throughput microbe monitoring in salmon.*
- 1044 Miller K. M., Günther O. P., Li S., Kaukinen K. H., Ming T. J., 2017 Molecular indices of viral disease  
1045 development in wild migrating salmon. *Conserv Physiol* **5**.
- 1046 Mueller A. J., Canty-Laird E. G., Clegg P. D., Tew S. R., 2017 Cross-species gene modules emerge from  
1047 a systems biology approach to osteoarthritis. *NPJ Syst Biol Appl* **3**: 13.
- 1048 Nicol B., Guiguen Y., 2011 Expression profiling of wnt signaling genes during gonadal differentiation  
1049 and gametogenesis in Rainbow Trout. *Sex Dev* **5**: 318–329.
- 1050 Oldham M. C., Horvath S., Geschwind D. H., 2006 Conservation and evolution of gene coexpression  
1051 networks in human and chimpanzee brains. *Proceedings of the National Academy of Sciences* **103**:  
1052 17973–17978.
- 1053 Pasquier J., Cabau C., Nguyen T., Jouanno E., Severac D., Braasch I., Journot L., Pontarotti P., Klopp C.,  
1054 Postlethwait J. H., Guiguen Y., Bobe J., 2016 Gene evolution and gene expression after whole  
1055 genome duplication in fish: the PhyloFish database. *BMC Genomics* **17**: 368.

- 1056 Pavey S. A., Bernatchez L., Aubin-Horth N., Landry C. R., 2012 What is needed for next-generation  
1057 ecological and evolutionary genomics? *Trends in Ecology & Evolution* **27**: 673–678.
- 1058 Prokkola J. M., Nikinmaa M., Lewis M., Anttila K., Kanerva M., Ikkala K., Seppänen E., Kolari I., Leder  
1059 E. H., 2018 Cold temperature represses daily rhythms in the liver transcriptome of a stenothermal  
1060 teleost under decreasing day length. *J. Exp. Biol.* **221**: jeb170670.
- 1061 Qiao Q., Le Manach S., Sotton B., Huet H., Duvernois-Berthet E., Paris A., Duval C., Ponger L., Marie  
1062 A., Blond A., Mathéron L., Vinh J., Bolbach G., Djediat C., Bernard C., Edery M., Marie B., 2016  
1063 Deep sexual dimorphism in adult medaka fish liver highlighted by multi-omic approach. *Sci. Rep.* **6**:  
1064 32459.
- 1065 Quinlan A. R., Hall I. M., 2010 BEDTools: a flexible suite of utilities for comparing genomic features.  
1066 *Bioinformatics* **26**: 841–842.
- 1067 R Core Team, 2018 R: A language and environment for statistical computing. R Foundation for Statistical  
1068 Computing.
- 1069 Roberts A., Pachter L., 2013 Streaming fragment assignment for real-time analysis of sequencing  
1070 experiments. *Nat Meth* **10**: 71–73.
- 1071 Robertson F. M., Gundappa M. K., Grammes F., Hvidsten T. R., Redmond A. K., Lien S., Martin S. A.  
1072 M., Holland P. W. H., Sandve S. R., Macqueen D. J., 2017 Lineage-specific rediploidization is a  
1073 mechanism to explain time-lags between genome duplication and evolutionary diversification.  
1074 *Genome Biol.* **18**: 111.
- 1075 Robinson M. D., Oshlack A., 2010 A scaling normalization method for differential expression analysis of  
1076 RNA-seq data. *Genome Biol.* **11**: R25.
- 1077 Robinson M. D., McCarthy D. J., Smyth G. K., 2010 edgeR: a Bioconductor package for differential  
1078 expression analysis of digital gene expression data. *Bioinformatics* **26**: 139–140.
- 1079 Rose N. H., Seneca F. O., Palumbi S. R., 2015 Gene networks in the wild: identifying transcriptional  
1080 modules that mediate coral resistance to experimental heat stress. *Genome Biology and Evolution* **8**:  
1081 243–252.
- 1082 Santoni D., Castiglione F., Paci P., 2013 Identifying correlations between chromosomal proximity of  
1083 genes and distance of their products in protein-protein interaction networks of yeast. (C Schönbach,  
1084 Ed.). *PLoS ONE* **8**: e57707.
- 1085 Sauvage C., Vagner M., Derôme N., Audet C., Bernatchez L., 2012a Coding gene single nucleotide  
1086 polymorphism mapping and quantitative trait loci detection for physiological reproductive traits in  
1087 Brook Charr, *Salvelinus fontinalis*. *G3 - Genes|Genomes|Genetics* **2**: 379–392.
- 1088 Sauvage C., Vagner M., Derôme N., Audet C., Bernatchez L., 2012b Coding gene SNP mapping reveals  
1089 QTL linked to growth and stress response in Brook Charr (*Salvelinus fontinalis*). *G3 -*  
1090 *Genes|Genomes|Genetics* **2**: 707–720.
- 1091 Sreenivasan R., Jiang J., Wang X., Bártfai R., Kwan H. Y., Christoffels A., Orban L., 2014 Gonad  
1092 differentiation in Zebrafish is regulated by the canonical wnt signaling pathway. *Biology of*  
1093 *Reproduction* **90**: e34397–10.
- 1094 Sutherland B. J. G., Gosselin T., Normandeau E., Lamothe M., Isabel N., Audet C., Bernatchez L., 2016  
1095 Salmonid chromosome evolution as revealed by a novel method for comparing RADseq linkage

- 1096 maps. *Genome Biology and Evolution* **8**: 3600–3617.
- 1097 Sutherland B. J. G., Hanson K. C., Jantzen J. R., Koop B. F., Smith C. T., 2014a Divergent immunity and  
1098 energetic programs in the gills of migratory and resident *Oncorhynchus mykiss*. *Mol. Ecol.* **23**:  
1099 1952–1964.
- 1100 Sutherland B. J. G., Koczka K. W., Yasuike M., Jantzen S. G., Yazawa R., Koop B. F., Jones S. R. M.,  
1101 2014b Comparative transcriptomics of Atlantic *Salmo salar*, Chum *Oncorhynchus keta* and Pink  
1102 Salmon *O. gorbuscha* during infections with salmon lice *Lepeophtheirus salmonis*. *BMC Genomics*  
1103 **15**: 200.
- 1104 Sutherland B. J. G., Rico C., Audet C., Bernatchez L., 2017 Sex chromosome evolution, heterochiasmy,  
1105 and physiological QTL in the salmonid Brook Charr *Salvelinus fontinalis*. *G3 -*  
1106 *Genes|Genomes|Genetics* **7**: 2749–2762.
- 1107 Thévenin A., Ein-Dor L., Ozery-Flato M., Shamir R., 2014 Functional gene groups are concentrated  
1108 within chromosomes, among chromosomes and in the nuclear space of the human genome. *Nucleic*  
1109 *Acids Research* **42**: 9854–9861.
- 1110 Thompson D., Regev A., Roy S., 2015 Comparative analysis of gene regulatory networks: from network  
1111 reconstruction to evolution. *Annu. Rev. Cell Dev. Biol.* **31**: 399–428.
- 1112 Vainio S., Heikkilä M., Kispert A., Chin N., McMahon A. P., 1999 Female development in mammals is  
1113 regulated by Wnt-4 signalling. *Nature* **397**: 405–409.
- 1114 van Dam S., Vösa U., van der Graaf A., Franke L., de Magalhães J. P., 2017 Gene co-expression analysis  
1115 for functional classification and gene-disease predictions. *Brief Bioinform.*
- 1116 van Nas A., Guhathakurta D., Wang S. S., Yehya N., Horvath S., Zhang B., Ingram-Drake L., Chaudhuri  
1117 G., Schadt E. E., Drake T. A., Arnold A. P., Luskis A. J., 2009 Elucidating the role of gonadal  
1118 hormones in sexually dimorphic gene coexpression networks. *Endocrinology* **150**: 1235–1249.
- 1119 Warnes G. R., Bolker B., Bonebakker L., Gentleman R., Hubert W., Liaw A., Lumley T., Maechler M.,  
1120 Magnusson A., Moeller S., Schwartz M., Venables B., *gplots: Various R Programming Tools for*  
1121 *Plotting Data*.
- 1122 Wijchers P. J., Festenstein R. J., 2011 Epigenetic regulation of autosomal gene expression by sex  
1123 chromosomes. *Trends Genet.* **27**: 132–140.
- 1124 Wong R. Y., McLeod M. M., Godwin J., 2014 Limited sex-biased neural gene expression patterns across  
1125 strains in Zebrafish (*Danio rerio*). *BMC Genomics* **15**: 905–10.
- 1126 Wu T. D., Watanabe C. K., 2005 GMAP: a genomic mapping and alignment program for mRNA and  
1127 EST sequences. *Bioinformatics* **21**: 1859–1875.
- 1128
