# Sex-specific co-expression networks and sex-biased gene expression in the salmonid Brook Charr *Salvelinus fontinalis*

Ben J. G. Sutherland<sup>1†\*</sup>, Jenni M. Prokkola<sup>2</sup>, Céline Audet<sup>3</sup>, and Louis Bernatchez<sup>1</sup>

<sup>1</sup> Institut de Biologie Intégrative et des Systèmes (IBIS), Université Laval, Québec, QC G1V 0A6, Canada

<sup>2</sup> Institute of Integrative Biology, University of Liverpool, L69 7ZB Liverpool, UK

<sup>3</sup> Institut des Sciences de la Mer de Rimouski, Université du Québec à Rimouski, Rimouski, QC G5L 3A1, Canada

<sup>†</sup>Current Address: Pacific Biological Station, Fisheries and Oceans Canada, Nanaimo, BC, V9T 6N7, Canada

\*Author for correspondence: BJGS

Pacific Biological Station, Fisheries and Oceans Canada, Nanaimo, BC, Canada

Phone: 1 (250) 751-4676

Email: ben.sutherland.1@ulaval.ca (BS)

**Data Deposition:** Brook Charr raw sequence data has been uploaded to SRA under BioProject

PRJNA445826, accession SRP136537. Arctic Charr raw sequence data is available under BioProject

PRJNA307980, accession SRP068854.

## ABSTRACT

Networks of co-expressed genes produce complex phenotypes associated with functional novelty. Sex differences in gene expression levels or in the structure of gene co-expression networks can cause sexual dimorphism and may resolve sexually antagonistic selection. Here we used RNA-sequencing in the paleopolyploid salmonid Brook Charr *Salvelinus fontinalis* to characterize sex-specific co-expression networks in the liver of 35 female and 51 male offspring. In both networks, modules were characterized for functional enrichment, hub gene identification, and associations with 15 growth, reproduction, and stress-related phenotypes. Modules were then evaluated for preservation in the opposite sex, and in the congener Arctic Charr *Salvelinus alpinus*. Overall, more transcripts were assigned to a module in the female network than in the male network, which coincided with higher inter-individual gene expression and phenotype variation in the females. Most modules were preserved between sexes and species, including those involved in conserved cellular processes (e.g. translation, immune pathways). However, two sex-specific male modules were identified, and these may contribute to sexual dimorphism. To compare with the network analysis, differentially expressed transcripts were identified between the sexes, finding a total of 16% of expressed transcripts as sex-biased. For both sexes, there was no overrepresentation of sex-biased genes or sex-specific modules on the putative sex chromosome. Sex-biased transcripts were also not overrepresented in sex-specific modules, and in fact highly male-biased transcripts were enriched in preserved modules. Comparative network analysis and differential expression analyses identified different aspects of sex differences in gene expression, and both provided new insights on the genes underlying sexual dimorphism in the salmonid Brook Charr.

**Keywords:** Co-expression; Salmonid; Sex-bias; Sexual Dimorphism; Transcriptomics; Weighted Gene Co-expression Network Analysis (WGCNA)

## INTRODUCTION

Understanding how sex bias in gene expression contributes to sexually dimorphic phenotypes, and how this affects fitness is an important area of study to understand genotype-phenotype interactions (Parsch and Ellegren 2013). The development of sex differences in phenotypes can be attributed to differences in the expression of both sex-specific and autosomal genes, caused by hormonal and epigenetic effects (Ellegren and Parsch 2007; Wijchers and Festenstein 2011), heterogamy and imperfect dosage compensation (Parsch and Ellegren 2013), epistatic interactions, and transcriptional network structural differences (Chen *et al.* 2016). Sex-biased gene expression is pervasive in many species and may alleviate sexually antagonistic selection, i.e., the selection for different phenotypes in the different sexes (Wright *et al.* 2018; Rowe *et al.* 2018). Transcriptome regulatory architecture differences between the sexes may contribute to the development of sex-biased gene expression (Chen *et al.* 2016; Wright *et al.* 2018). Sex-biased expression underlies much of phenotypic sexual dimorphism, which can occur without sexually antagonistic selection (e.g. imperfect dosage compensation; Parsch and Ellegren 2013). To connect alleles to phenotypes, typically association studies are applied (Mackay, 2001; Bush and Moore 2012), but these bypass important intermediate regulatory steps such as transcriptome regulation (Mackay *et al.* 2009). To characterize transcriptome regulation, it is important to consider the underlying structure of the network in which genes are co-regulated (Mähler *et al.* 2017).

Constructing gene co-expression networks is often based on correlating transcript abundance across samples (Langfelder and Horvath 2008). A network is comprised of modules, each of which is comprised of a group of genes with correlated expression patterns. Co-expression clustering is a valuable approach to classify and visualize transcriptomic data (Eisen *et al.* 1998). Clustering often groups genes together that have similar cellular functions and regulatory pathways (Eisen *et al.* 1998), although this is not always the case (Gillis and Pavlidis 2012; van Dam *et al.* 2017). Module functions can be predicted based on phenotypic correlations (Filteau *et al.* 2013; Rose *et al.* 2015) or functional enrichment analysis (e.g. Gene Ontology). Genes that are highly connected and central to a module (i.e., hub genes) may be upstream regulators of the module, and potentially more related to the module function (van Dam *et al.* 2017). Hub genes may also be under higher selective constraint than other less connected genes, and as a result may show lower genetic variation and higher phylogenetic conservation (Mähler *et al.* 2017). Network information thus provides novel insight into both gene activity and evolution.

Comparative network analysis across species can advance the understanding of species-specific innovations. For example, comparing brain transcriptome networks between chimpanzee *Pan troglodytes* and human *Homo sapiens* indicates low preservation of modules found in specific brain regions associated with human evolution such as the cerebral cortex (Oldham *et al.* 2006). Comparing networks can highlight potential drivers of phenotypic changes associated with adaptive divergence that can lead to

ecological speciation (Filteau *et al.* 2013; Thompson *et al.* 2015). Cross-species network comparisons have also been used to detect gene modules associated with disease (Mueller *et al.* 2017) or with seasonal phenotypic changes (Cheviron and Swanson 2017). These insights are often not possible to obtain through standard gene-by-gene differential expression analysis, which captures a smaller proportion of the variation than differential co-expression analysis (Oldham *et al.* 2006; Gaiteri *et al.* 2014).

Network comparisons can also provide insight on sex differences (Chen *et al.* 2016). Differing structure of networks between the sexes may resolve sexual antagonism through gene regulation (Chen *et al.* 2016). Other genetic architecture solutions to this conflict may include sex-dependent dominance (Barson *et al.* 2015) or maintaining alleles associated with sexual antagonism on sex chromosomes (Blackmon and Brandvain 2017). Comparisons between the sexes are complicated by the fact that sex bias in networks can be tissue-specific, with modules more preserved between sexes in brain and muscle networks than in liver or adipose tissue (van Nas *et al.* 2009; Wong *et al.* 2014). Liver tissue is considered a highly sexually dimorphic tissue, particularly in oviparous species at a reproductive stage (Qiao *et al.* 2016). Although the extent of differences may depend on the tissue of study, network comparisons between sexes can provide new insight into the regulatory underpinnings of sexual dimorphism and antagonism.

Salmonids are an important species of commercial, ecological, and cultural value. This species group is also a model system for studying genome evolution after a whole genome duplication event that occurred approx. 60-88 million years ago (Allendorf and Thorgaard 1984; Crête-Lafrenière *et al.* 2012; Macqueen and Johnston 2014). Charr (*Salvelinus* spp.) are a phenotypically diverse group within Family Salmonidae that are less characterized in terms of transcriptomic and genomic data than other genera (e.g. *Salmo* or *Oncorhynchus*; but see Christensen *et al.* 2018). Brook Charr *Salvelinus fontinalis* is a primarily freshwater species native to Eastern North America. Arctic Charr *S. alpinus* has a circumpolar distribution mainly in the Arctic, and these two lineages diverged approximately 10 million years ago (Horreo 2017). Sexual dimorphism in body size, for example, is associated with reproductive success in Brook Charr. The largest males are typically dominant and fertilize the majority of a brood (Blanchfield *et al.* 2003). However, smaller sneaker males can also contribute in this same fertilization, albeit to a lesser extent than the large male. In females however, large body size is more constrained as it is highly associated to fecundity, and smaller life history variants are not expected (reviewed by Fleming 1998). In other salmonids, body size and secondary sexual characteristics (e.g. dorsal hump size) are also favoured male traits (Quinn and Foote 1994). With different optimal reproductive-associated phenotypes between the sexes, this could give rise to sexual dimorphism as well as sexual antagonism.

Here we profile liver transcriptomes of 100 Brook Charr offspring from a single family by RNA-sequencing to characterize co-expression patterns. Transcriptome profiling was conducted shortly (3 h)

after the application of an acute handling stressor to all individuals during the reproductive season, increasing variance among individuals. The goals of this study are to i) characterize the sex-specific or preserved modular structure of gene co-expression in liver tissue in Brook Charr; ii) characterize module preservation in the congener Arctic Charr; iii) connect phenotype and functional category associations to the identified modules; and iv) integrate results from the network analyses with a gene-by-gene differential expression analysis to determine whether the two methods provide different insights on sexual dimorphism in transcriptome architecture.

## METHODS

### *Animals and sample collection*

Brook Charr used in this study were originally used to construct a low-density genetic map for reproductive (Sauvage, Vagner, Derôme, Audet, and Bernatchez 2012a), growth and stress response QTL analyses (Sauvage, Vagner, Derôme, Audet, and Bernatchez 2012b). They were used to construct a high-density genetic map that was integrated with the other salmonids (Sutherland *et al.* 2016), then used to identify QTL, sex-specific recombination rates, and the Brook Charr sex chromosome (Sutherland *et al.* 2017). The 192 F<sub>2</sub> individuals were full sibs from a single family resulting from a cross of an F<sub>1</sub> female and F<sub>1</sub> male that were from an F<sub>0</sub> female from a wild anadromous population (Laval River, near Forestville, Québec) and an F<sub>0</sub> male from a domestic population (Québec aquaculture over 100 years).

F<sub>2</sub> offspring were raised until 65-80 g and then 21 phenotypes were collected along with several repeat measurements to determine growth rate. Full details on these phenotypes are previously described (Sauvage *et al.* 2012a, 2012b), including sex-specific phenotype averages, standard deviations, and phenotype correlations for all 192 offspring (see Table S1 and Figure S2 from Sutherland *et al.* 2017). The 15 phenotypes used in the present study to correlate with co-expression modules were maturity, length, weight, growth rate, condition factor, liver weight, post-stress cortisol, osmolality and chloride, change in cortisol, osmolality and chloride between one week before and three hours after an acute handling stress, egg diameter, sperm concentration, and sperm diameter. Fish were anaesthetized with 3-aminobenzoic acid ethyl ester and killed by decapitation as per regulations of Canadian Council of Animal Protection recommendations approved by the University Animal Care Committee, as previously reported (Sauvage *et al.* 2012a). Most individuals were in a reproductive state at the time of the dissection, which was in the fall (smolting occurs in this strain in the spring; Boula *et al.* 2002). Phenotypic sex was determined by gonad inspection (Sauvage *et al.* 2012b). Immediately after decapitation, liver tissue was excised, flash frozen then kept at -80 °C until RNA extraction.

## RNA extraction and library preparation

A total of 100 of the 192 individuals were used for liver transcriptome profiling. Prior to extraction, samples were assigned random order to reduce batch effects on any specific group of samples. Total RNA was extracted from equal sized pieces of liver tissue from approximately the same location on the liver for all samples (0.4 x 0.2 x 0.2 cm; ~1 mg). This piece was rapidly immersed in 1 ml TRIzol (Invitrogen), then placed on dry ice until all samples per batch were prepared (6-12 per extraction round). When all samples were ready, the samples immersed in frozen TRIzol were allowed to slightly thaw for approximately 1 min until beads within the vials were able to move, then the samples were homogenized for 3 min at 20 hz, rotated 180°, and homogenized again for 3 min at 20 hz on a MixerMill (Retsch). The homogenate was centrifuged at 12,000 x g for 10 min at 4 °C. The supernatant was transferred to a new 2 ml tube and incubated for 5 min at room temperature. Chloroform (200 µl) was added to the tube, the tube was shaken vigorously for 15 s and incubated 3 min at room temperature, then centrifuged at 12,000 x g for 15 min at 4 °C. Finally the aqueous layer was carefully transferred to a new centrifuge tube, and into an RNeasy spin column (QIAGEN), as per manufacturer's instructions with the optional on-column DNase treatment. All samples were quality checked using a BioAnalyzer (Agilent), where all samples had RIN ≥ 8.3 (mean = 9.5), and were quantified using spectrophotometry on a Nanodrop-2000 (Thermo Scientific).

Libraries were prepared using 1 µg of total RNA in the randomized order using TruSeq RNA Sample Prep Kit v2 (Illumina) to generate cDNA as per manufacturer's instructions using adapters from both Box A and Box B, AMPure XP beads (Agencourt) and a magnetic plate in batches of 8-16 samples per batch. Fragmentation times of 2, 4 and 6 min were tested for optimal size fragmentation and consistency, and as a result of this test, all samples were processed using a 6 min fragmentation time. PCR amplification to enrich cDNA was performed using 15 cycles, as per manufacturer's instructions. All libraries were quantified using Quant-iT PicoGreen (ThermoFisher) and quality-checked using the BioAnalyzer on High Sensitivity chips (Agilent). Once all samples were confirmed to be high quality and of approximately the same insert size, eight individually tagged samples were pooled in equimolar quantities (80 ng per sample) and sent to McGill Sequencing Center for 100 bp single-end sequencing on a HiSeq2000 (Illumina; total = 13 lanes). Parents (F<sub>1</sub> individuals) were sequenced in duplicate in two separate lanes.

## RNA-seq mapping

Quality trimming and adapter removal was performed using Trimmomatic (Bolger et al. 2014), removing adapters with the *-illuminaclip* (2:30:10) option and removing low quality reads (< Q2) using *-slidingwindow* (20:2), *-leading* and *-trailing* options. Q2 was used for optimal quantification as previously

demonstrated (MacManes 2014). A reference transcriptome for Brook Charr was obtained from the Phylofish database (Pasquier *et al.* 2016). Trimmed reads were mapped against the reference transcriptome with *bowtie2* (Langmead and Salzberg 2012) using *--end-to-end* mode reporting multiple alignments (*-k* 40) for optimal use with eXpress for read count generation (Roberts and Pachter 2013). The multiple alignment file was converted to bam format and sorted by read name using SAMtools (Li *et al.* 2009) and input to eXpress (see full bioinformatics pipeline in *Data Accessibility*).

Read counts were imported into edgeR (Robinson *et al.* 2010) for normalization and low expression filtering. The smallest library (lib87, 8,373,387 aligned reads) was used to calculate a low-expression threshold. A count-per-million threshold of 10 reads per transcript in this library defined the threshold for transcript retention ( $\text{cpm} > 1.19$ ), as suggested in the edgeR documentation. Any transcript passing this threshold in at least five individuals was retained through the first filtering step for initial data visualization and annotation. Additional low expression filtering was conducted in the differential expression analysis and network analysis (see below). Although transcripts were previously annotated in the Phylofish database (Pasquier *et al.* 2016), each transcript was re-annotated using *trinode* (Bryant *et al.* 2017) and *tblastx* against Swissprot (cutoff =  $1e^{-5}$ ) to obtain as many identifiers as possible for Gene Ontology enrichment analysis. For individual gene descriptions, the re-annotated Swissprot identifier was used primarily, and the Phylofish annotation secondarily.

#### *Differential expression analysis between sexes*

To reduce the number of transcripts with very low expression in the differential expression analysis, we applied a low expression filter of  $\text{cpm} > 1.19$  in at least 65% of the individuals from each sex (i.e.  $\geq 31$  / 47 females or 35 / 53 males). The data was then normalized using the weighted trimmed mean of M-values (TMM Robinson and Oshlack 2010) to generate normalized  $\log_2$  expression levels. Using *model.matrix* from edgeR with sex as the data grouping, a genewise negative binomial generalized linear model (*glmFit*) was fit to each gene. Genes with false discovery rate of  $\leq 0.05$  and linear fold-change  $\geq 1.5$  were defined as differentially expressed. These genes were binned into low sex bias (i.e.  $1.5 \leq \text{FC} \leq 4$ ) or high sex bias (i.e.  $\text{FC} > 4$ ) for each sex (negative FC for females, positive for males), as per previous delimitations (Poley *et al.* 2016).

#### *Weighted gene co-expression network analysis (WGCNA) in Brook Charr*

To best associate modules with phenotypes of interest, sexes were analyzed separately, with preservation evaluated in the opposite sex (Langfelder *et al.* 2011). Due to the independent analysis of each sex, low expression filters (i.e.  $\text{cpm} > 0.5$  in at least five individuals) were conducted separately in each sex, then the data normalized as described above. The average library size was 27,896,535 alignments, indicating



cpm > 0.5 corresponds to at least 13.95 reads aligning to the transcript for this mean library size. Sex-specific data was used as an input for weighted gene correlation network analysis (WGCNA; Langfelder and Horvath 2008; 2012) in R (R Core Team 2018).

Within each sex, sample outliers were detected and removed by clustering samples based on transcript expression by Euclidean distance and visually inspecting relationships with the *hclust* average agglomeration method of WGCNA (Langfelder and Horvath 2008). Removal of outliers prevents spurious correlations of modules due to outlier values and improves network generation (Langfelder *et al.* 2011). Remaining samples were then correlated with trait data using *plotDendroAndColors*. Network parameters for both female and male networks were defined as per tutorials using unsigned correlation networks (Langfelder and Horvath 2008). Unsigned networks consider the connectivity between identical positive or negative correlations to be equal, and thus genes in the same module may have similar or inverse expression patterns. An optimal soft threshold power (6) was identified by evaluating effects on the scale free topology model fit and mean connectivity by increasing the threshold power by 1 between 1-10 and by 2 between 12-20 (Figure S1), as suggested by Langfelder and Horvath (2008). An unsigned adjacency matrix was generated in WGCNA to identify the 25,000 most connected transcripts to retain for reducing computational load. Then, to further minimize noise and spurious associations, adjacency relationships were transformed to the Topological Overlap Matrix using the *TOMdist* function (Langfelder and Horvath 2008).

Similarity between modules was evaluated using module eigengenes (i.e. the first principal component of the module). Dissimilarity between eigengenes was calculated by signed Pearson correlation as suggested by Langfelder and Horvath (2008) and plotted using *hclust*. When modules were more than 0.75 correlated (dissimilarity 0.25), they were merged as suggested by Langfelder and Horvath (2008). Merged module eigengenes were then tested for associations with phenotypes by Pearson correlation. Notably the sign of the correlation does not necessarily indicate the direction of the relationship between the expression of specific genes in each module and the phenotype because the modules were built using unsigned networks.

Module membership (i.e., the module eigengene-gene correlation) was used to define the top central transcripts for each module (i.e., hub genes). Gene significance (i.e., the absolute value of the trait-gene correlation) was calculated for each transcript against traits weight, specific growth rate, condition factor, hepatosomatic index, change in cortisol, osmolality and chloride from the brief handling stressor, female egg diameter, and male sperm concentration and diameter. Module eigengenes were tested for correlation against traits using Pearson correlation ( $p \leq 0.01$ ).

Gene Ontology enrichment analysis of transcripts within each module was conducted using the re-annotated Swissprot identifiers in DAVID Bioinformatics (Huang *et al.* 2009). Heatmaps for modules



of interest were generated by using the package *gplots* using the normalized log<sub>2</sub> cpm data (Warnes *et al.* 2016). Expression values were standardized across samples for each transcript and Pearson correlation was used to cluster transcripts and samples.

To determine sex-specific or sex-conserved modules, module preservation was evaluated by comparing male transcript expression to the generated female modules, and visa-versa, using the *modulePreservation* function of WGCNA. A total of 200 permutations of randomly assigned module labels were used to calculate module preservation rank and Zsummary (Langfelder *et al.* 2011). Low Zsummary scores indicate no preservation ( $\leq 2$ ), intermediate indicate moderate preservation (2-10) and high scores ( $\geq 10$ ) indicate strong module preservation (Langfelder *et al.* 2011). Module quality was also determined for each module as a measure of module robustness that is characterized by conducting the analysis on multiple random subsets of the original data (Langfelder *et al.* 2011). In addition, cross-tabulation of the proportions of female modules in male modules and visa-versa were performed in R. Cross-tabulation requires similar modular structures of the compared networks, whereas adjacency comparisons directly compare co-expression independent of network topology. All pipelines to analyze the current data are documented and available on GitHub (see *Data Accessibility*).

#### *Module preservation in Arctic Charr*

To compare module preservation between Brook Charr and Arctic Charr *S. alpinus* we used RNA-seq data from 1+ year-old Arctic Charr. The broodstock of this population was reared in hatchery conditions for three generations after being collected from a subarctic, land-locked population in Finland (Lake Kuolimo, 61°16' N; 27°32' E). The data were collected from nine male liver samples (fish relatedness not known) from each of 8 °C and 15 °C (total = 18 samples), but due to a large effect of temperature on the transcriptome, and differences between sampling times in the 15 °C group, only the nine samples from the 8 °C, group were used here (normal rearing temperature during summer at the fish hatchery; Figure S2) (Prokkola *et al.* 2018). Fish body mass at 8°C was on average 24.2 g ± standard deviation (S.D.) 10.4 g.

Sample processing was explained fully by Prokkola *et al.* (2018) and briefly described here. In August 2013, fish were euthanized using 200 ppm sodium bicarbonate-buffered tricaine methanesulfonate (MS-222), after which liver samples were collected and flash frozen in liquid nitrogen (Prokkola *et al.* 2018). RNA was extracted from approximately 10 mg of liver tissue using Tri-reagent (Molecular Research Center), and quality checked using a BioAnalyzer (Agilent), with an average identified RNA integrity number of 9.95. Strand-specific cDNA library preparation and sequencing were conducted at Beijing Genomics Institute (BGI Hong Kong) using TruSeq RNA Sample Prep Kit v2 (illumina) and sequenced on an Illumina HiSeq2000 instrument to generate paired-end 100 bp reads. All samples were pooled with unique barcodes across four sequencing lanes. Adapters were removed at BGI, and reads

trimmed with Trimmomatic (Bolger et al. 2014) using options *leading* and *trailing* (5) *slidingwindow* (4:15) and *minlen* (36). From samples included in this study, on average  $41.7 \pm \text{S.D. } 7.4$  million reads were obtained.

Transcript expression was calculated as above, including using the Brook Charr reference transcriptome for ease of cross-species comparisons. Low expression filtering and normalization for the Arctic Charr data was conducted as above (cpm > 0.5 in at least five individuals). However, a network was not constructed for these samples. Using samples from both temperatures, modules were previously identified (Prokkola et al. 2018). Once normalized and input to WGCNA, read counts in Arctic Charr 8°C samples were used to build a gene adjacency matrix, which was then compared against modules generated for female and male Brook Charr samples using the *modulePreservation* function as described above. Caveats regarding this data should be noted, including the smaller sample size, immature state of Arctic Charr, minor differences in rearing environments (albeit both were reared in hatchery conditions), and unknown relatedness.

#### *Identifying one transcript per gene and assigning chromosome positions*

The Brook Charr reference transcriptome (Pasquier et al. 2016) possibly contains multiple isoforms for a single gene (Y. Guiguen, *pers. comm.*). Therefore an approach was taken here to reduce multiple genes to a single transcript per gene for enrichment analyses on the sex chromosome or in sex-specific modules. First, the Brook Charr reference transcriptome was aligned to the Atlantic salmon *Salmo salar* chromosome-level genome assembly RefSeq GCF\_000233375.1 (Lien et al. 2016) using GMAP (Wu and Watanabe 2005). Alignments were converted to an indexed bam retaining only high quality (-q 30) alignments using samtools (Li et al. 2009). The indexed bam was converted to a bed file using bedtools *bamtobed* (Quinlan and Hall 2010). Second, the lengths of Brook Charr transcripts were calculated using custom python scripts (see *Data Accessibility*). With the alignment position, lengths, and expression status (expressed or not expressed), a single transcript per contiguous (or overlapping) alignment block on the reference genome was retained using a custom R script (see *Data Accessibility*). For each contiguous alignment block, this script preferentially retained the longest, expressed transcript. All other redundant transcripts, and all that did not align, were not retained. In some cases, a single transcript can align to multiple locations with high mapping quality ( $\text{MAPQ} \geq 30$ ). Since there was no reason to retain one alignment over another, both alignments were retained in the baseline set for these cases.

The alignment information per retained Brook Charr transcript was used to assign an Atlantic Salmon chromosome identifier to each retained unique transcript. The chromosome information was combined with the module information for all transcripts in each sex-specific network. This analysis was conducted separately for females and males, as expressed genes were in some cases different between the

two sexes and therefore so would be the selection of which transcript to retain. The correspondence between the Atlantic Salmon genome assembly accession identifier and the Atlantic Salmon chromosome identifier were obtained from the NCBI genome assembly website (see *Data Accessibility*). In general, correspondence of gene synteny is expected to be similar between Atlantic Salmon and Brook Charr (Sutherland *et al.* 2016). Using the chromosome correspondence table in Sutherland *et al.* (2016), the Atlantic Salmon chromosome containing the sex chromosome of Brook Charr was identified. For each sex-specific co-expression module, the proportions of Brook Charr genes located on the Atlantic Salmon chromosome that corresponds to the Brook Charr sex chromosome were characterized and compared to the total list of all non-redundant Brook Charr transcripts identified. Fisher exact tests were then used to determine significance for each sex-specific module-sex chromosome combination (i.e., two tests). The chromosome information was also combined with the sex bias fold change values. Finally, the proportion of highly or moderately sex-biased transcripts for females and males were investigated for overrepresentation on the sex chromosome and in sex-specific or conserved modules using Fisher's exact tests in custom R scripts (see *Data Availability*).

## RESULTS

### *Transcriptome overview*

Of the total 69,440 transcripts in the Brook Charr reference transcriptome, 51,911 passed initial low expression filters when using all samples together. Low-expression filtering for differential expression analysis (i.e., expressed in at least 65% of individuals from one of two sexes) resulted in the retention of 42,622 transcripts. Low-expression filtering for sex-specific network analysis (i.e., expressed in at least five individuals of the sex of interest) resulted in 50,748 and 50,530 transcripts passing filters in females and males, respectively. When considering each sex individually, most of the expressed genes were expressed in a majority of the samples: females expressed 35,461 transcripts in > 90% of the samples; males expressing 35,714 transcripts in > 90% of the samples (Figure S3).

Hierarchical clustering of samples by gene expression indicated a large effect of sex, where 35 of 47 F<sub>2</sub> females clustered with the F<sub>1</sub> female, and 52 of 53 F<sub>2</sub> males were clustered together with the F<sub>1</sub> male (Figure 1). As described in the Methods, outliers were removed to avoid spurious network correlations (Langfelder *et al.* 2011), and this included the removal of one male leaving 52 males remaining, and the removal of one group of females that had large liver weight, leaving 35 females remaining (see phenotype liver weight in Figure 1; Figure S4). When these outlier samples were included while constructing the female network, many modules correlated with the liver weight phenotype, suggesting that these samples were having a large impact on the network.

Interestingly, females displayed higher inter-individual variance than males, as indicated by the multiple smaller sample clusters of females in the hierarchical clustering relative to the fewer and larger sample clusters of the males (Figure 1). Likewise, six of the phenotypic traits also displayed higher variance in females (significant heteroscedasticity at  $P < 0.05$ , Levene's test): liver weight, cortisol level, osmolality, and change in cortisol, osmolality and chloride levels due to handling (Figure S5). Some of the higher variance in these traits in females was likely explained by maturity, but maturity did not explain all of the variance within the female gene expression, as the different sample clusters observed had a variety of maturity states, and samples that were all considered mature were present in different sample clusters (Figure 1).

#### *Network construction and phenotype correlations: female Brook Charr*

Highly correlated module eigengenes ( $r > 0.75$ ) were merged, combining 81 assigned modules into 14 (Figure S6A; Figure S7A). Assigned female modules each contained a range of 77-10,533 transcripts (Table 1). The largest module was *darkred*, with 10,533 transcripts (see Table 1), which included more transcripts than even the unassigned *grey* module (second largest; 5,892 transcripts).

Phenotype ( $n = 15$ ) correlations with module eigengenes indicate potential functional associations of the modules (Table 1; Figure 2). The strongest associations of phenotypes to modules were with maturity index, for example with *thistle2* ( $r > 0.81$ ), and *corall* ( $r = -0.83$ ). Although the large liver weight outlier samples were removed prior to network generation, liver weight remained highly correlated with *indianred4* ( $r = 0.73$ ), *salmon*, *coral* ( $r = 0.52$ ), and *blue2* ( $r = -0.64$ ). Growth rate showed similar module correlations to liver weight (Figure 2). Osmolality change was also correlated with *indianred4* ( $r = 0.56$ ) and *blue2* ( $r = -0.58$ ), as well as with *darkred*, *thistle3* ( $r \geq 0.51$ ), *darkorange*, *green* and *darkmagenta* ( $r \geq |-0.49|$ ). Chloride change had no significant associations, but post-stress chloride was correlated with *thistle3* ( $r = 0.56$ ) and *lightsteelblue* ( $r = -0.53$ ). Although no modules were significantly associated with cortisol (change or post-stress;  $p \geq 0.01$ ), *ivory* was close ( $r = -0.38$ ;  $p = 0.03$ ).

In order to understand the gene composition of modules, Gene Ontology functional enrichment analysis of the transcripts within each module was conducted (Table 1; Additional File S1). The *salmon* module (correlated with liver weight) was enriched for erythrocyte development. The *blue2* module (liver weight) was associated with ribonucleoprotein complex. *Darkorange*, *green*, and *darkmagenta* modules (all correlated with osmolality change) were enriched for small molecular metabolic process, translation and metabolism functions, respectively. One module did not have significant enrichment of biological processes, *lightsteelblue* (correlated with chloride change).

### Preservation of co-expression: female Brook Charr network

The preservation of co-expression of female Brook Charr modules in Brook Charr males was primarily evaluated using network adjacency comparisons, which are more sensitive and robust than cross-tabulation methods (Langfelder *et al.* 2011). Most female modules were preserved in males and only *darkred* had weak evidence for preservation (Table 1). *Green* was the most conserved ( $Z_{\text{summary}} = 100$ ), followed by *blue2*, *salmon*, *lightsteelblue* and *darkorange* ( $Z_{\text{summary}} \geq 48$ ; Table 1). Modules associated with translation activities were among the highest conserved modules (e.g. *green* and *blue2*).

Published male Arctic Charr liver transcriptome data was then compared to the network to evaluate cross-species module preservation (Prokkola *et al.* 2018). Even with caveats regarding sample size (see Methods), several female Brook Charr modules were highly preserved in Arctic Charr males, including *blue2* ( $Z_{\text{summary}} = 34$ ), *green* ( $Z_{\text{summary}} = 24$ ), and *salmon* ( $Z_{\text{summary}} = 17$ ), also the most conserved in male Brook Charr (Table 1). Other female Brook Charr modules with moderate evidence for preservation in male Arctic Charr included *darkorange* and *lightsteelblue* ( $Z_{\text{summary}} > 8$ ), which were also highly preserved in male Brook Charr. It is noteworthy that the ranking of preservation of female modules in the Arctic Charr and Brook Charr males is highly similar (Table 1).

### Network construction, phenotype correlations, and sex-specificity: male Brook Charr

Highly correlated male modules (eigengene correlation  $r > 0.75$ ) were merged, reducing 44 assigned male modules to 25 (Figure S6B; Figure S7B). Unlike the female network, a large proportion of the male data could not be assigned to a module. The unassigned *grey* module contained 72% of the analyzed transcripts (17,992 transcripts). Assigned modules each contained between 54-1,732 transcripts (Table 2; Additional File S2). Phenotypic correlations with male module eigengenes were tested (Figure S8; see Supplemental Results; summarized in Table 2). Of note were several modules enriched for immunity-related functions, including *darkmagenta* (defense response to virus) and *steelblue* (positive regulation of innate immune response) (Table 2 and Additional File S1). These two immune processes were found to belong to different modules that were not just inversely regulated (in an unsigned network such as this, these would be grouped), but likely having decoupled regulation (Figure 3A), although the modules were still correlated (Figure S7B).

Preservation of male modules in females was also evaluated, but in contrast to what was observed in the preservation of female modules in males (see above), many of the male modules were weakly to moderately preserved in the females. Highly preserved modules included *yellow* ( $Z_{\text{summary}} = 58$ ; Figure 3B) and *brown* ( $Z_{\text{summary}} = 38$ ), *tan* ( $Z_{\text{summary}} = 43$ ), and *lightcyan* ( $Z_{\text{summary}} = 34$ ). Some modules were less preserved than even the randomly generated *gold* module (Table 2) and the unassigned *grey* module, including *green* (translation and size;  $Z_{\text{summary}} = 4.5$ ), *darkgrey* (mitochondrial membrane;

Zsummary = 1.8) and *ivory* (transcription factor activity; Zsummary = 0.8; Figure 3C), suggesting the co-expression trends in these modules are less preserved between the sexes. Preserved modules *yellow* and *brown* were enriched for ribosomal or translation-related functions, as was the less preserved *green* module (Table 2). *Ivory*, the most sex- and species-specific male module (see below; Table 2; Figure 3C) was enriched for neurogenesis in GO biological process, but also transcription factor activity in GO molecular function (Additional File S1). Other non-preserved or lowly preserved modules were enriched for membrane activity including *darkgrey* (mitochondrial inner membrane) and *lightcyan1* (membrane organization; Additional File S1). Preservation of male Brook Charr modules was also explored in Arctic Charr males. Similar to that observed in the female modules, when a male Brook Charr module was preserved in female Brook Charr, it was also often preserved in male Arctic Charr (see similar ranking of preservation; Table 2).

### *Sex-biased expression, sex-specific modules, and the sex chromosome*

Of the 42,622 expressed transcripts, 6,983 (16.4%) were differentially expressed ( $FC \geq 1.5$ ; glmFit FDR  $\leq 0.05$ ). Female-biased genes included 3,989 moderately (1.5-4-fold) and 236 highly biased (>4-fold) transcripts. Highly biased transcripts included known sex-biased genes such as *vitellogenin*, and *zona pellucida sperm-binding proteins*. Male-biased genes included 2,638 moderately and 120 highly biased transcripts, including *semaphorin-3F* (most highly male-biased transcript). For a complete list, see Additional File S3.

Sex-biased transcripts were not overrepresented in female or male sex-specific modules (Table 3). However, unexpectedly, highly male-biased genes were overrepresented in highly preserved modules (36 transcripts in highly preserved modules, 97% of the highly sex-biased transcripts) in comparison to the overall percentage in the network (4,886 transcripts in highly preserved modules, 76.5% of network transcripts; Table 3; two-sided Fisher's exact test  $p = 0.0013$ ). The female data was more similar between the highly sex-biased transcripts and the entire network (45.2% and 46.6%, respectively). Sex-specific modules were not enriched on the sex chromosome (Fisher's exact test  $p > 0.5$ ), including male modules *ivory* and *darkgrey* (Table S1).

Of the 47 non-overlapping, highly male-biased transcripts assigned to chromosomes, five were on the sex chromosome (10.6%), relative to 779 on the sex chromosome of the 12,934 expressed in males (Ssa09; 6.0%). However, this difference was not significant (one-tailed Fisher's exact test  $p = 0.15$ ). Furthermore, moderately male-biased transcripts were not enriched on the sex chromosome (5.3%) relative to all expressed transcripts (6%), nor were highly or moderately female-biased transcripts (high bias = 4.1%; moderate bias = 5.8%).



## DISCUSSION

Gene co-expression produces complex phenotypes and may underlie key aspects of phenotypic evolution (Filteau *et al.* 2013) and sexual dimorphism (Chen *et al.* 2016). One of the main challenges in producing females and males is developing different phenotypes from largely the same set of genes (Rowe *et al.* 2018). Transcriptome architecture may provide a solution to this challenge. In this study, co-expression networks for both female and male Brook Charr liver transcriptomes were characterized and compared to each other. Although the female network had much higher module assignment of expressed transcripts, in general most modules were preserved between the sexes. Two sex-specific modules were identified in males that may provide insight on the evolution of gene expression and phenotypic sexual dimorphism. Sex bias was observed in 16% of the expressed transcripts, and these sex-biased transcripts were not overrepresented in sex-specific modules, indicating the different results obtained from these two analysis approaches.

### *Sex differences in co-expression networks and cross-species preservation*

Females and males clustered distinctly in unsupervised clustering by gene expression, as has been observed in other studies of fish liver at a reproductive stage (Qiao *et al.* 2016). Interestingly, there was a large difference in the number of transcripts assigned to modules between the sexes; of the 25 k most connected transcripts, females had 76% transcripts assigning to a module, and males only 28%. Importantly, this observation coincides with higher inter-individual variation in gene expression in females than in males (Figure 1) and higher inter-individual variation in six phenotypes in females than in males (Figure S5). When inter-individual variation in gene expression is low, transcripts will not be as well clustered, because without variance there can be no co-variance for clustering algorithms to act upon (Tritchler *et al.* 2009). Therefore, the lower variance in male gene expression may have resulted in the observed lower module assignment. The observation of lower variation in phenotypes is an interesting result that highlights similarities between transcriptomic and phenotypic expression. Building networks in both sexes allowed for the identification of this lower assignment to modules in males, which may have not been noted otherwise, as female modules generally were scored as preserved in males. Furthermore, this allowed the identification of many male network modules with seemingly important and different functional associations that in the female network were all grouped together into one very large module (i.e., *darkred*). It will be valuable to inspect sex-specific module generation in other salmonids and in tissues other than liver to understand the generality of these sex differences and associations to inter-individual variance in gene expression and phenotypes.

Our observations confirm previous findings that co-expression patterns are often preserved between sexes or closely related species (van Nas *et al.* 2009; Wong *et al.* 2014; Cheviron and Swanson

2017). Here, highly preserved modules between the sexes were often comprised of genes within pathways involved in conserved functions. The most preserved modules between the sexes and species were involved in basic cellular processes and included many co-expressed subunits of a multiple subunit protein complex, such as translation machinery. Multiple subunits and closely related genes have long been known to cluster together by co-expression (Eisen *et al.* 1998). Immunity-related modules were also preserved between the sexes, with co-expression patterns similar to those observed previously in salmonids (Sutherland, Koczka, *et al.* 2014). Considering the importance of immune function to both sexes, it is not surprising that immunity modules are preserved between sexes.

The male-specific module *darkgrey* and the lowly preserved *green* were both associated with size, which can be sexually dimorphic in salmonids and is associated to breeding success in males (Blanchfield *et al.* 2003). There were no associations of female modules to length and weight (although there was association to growth rate), which further emphasizes the potential for these male-specific modules to be contributing to sexual dimorphism. The other male-specific module, *ivory*, may contribute to sexual dimorphism and resolution of sexual antagonism by being an upstream controller of different programs, as it is enriched for transcription factor activity and hub genes as putative transcription factors. Hub genes of *ivory* include genes from the *wnt* protein family. Wnt signaling is associated with gonad differentiation and shows sex-specific expression in several studies in mammals and fish (Vainio *et al.* 1999; Nicol and Guiguen 2011; Sreenivasan *et al.* 2014; Böhne *et al.* 2014). Future studies could investigate whether transcription factors from the sex-specific *ivory* module control expression of transcripts found to be sex-biased here once transcription factor binding sites are characterized in this species.

The presence of sex-specific modules and sexually dimorphic gene expression in the liver corresponds with what is known about sex hormones produced in the gonads, as these hormones have been shown to regulate a significant proportion of the liver transcriptome in mouse (van Nas *et al.* 2009). In a large-scale transcriptome study in humans, the liver was not one of the most sexually dimorphic in terms of sex-biased genes (Chen *et al.* 2016). In oviparous species at a reproductive stage however, this tissue is highly sexually dimorphic, given the role in females for producing oocyte constituents (e.g. *vitellogenins*, *zona pellucida* proteins) (Qiao *et al.* 2016). Some of the strongest phenotypic associations of female modules were to maturity. These associations may reflect the effects of sex hormones such as estradiol, which controls reproduction and has a strong influence on transcription in fish (Garcia-Reyero *et al.* 2018). There were no male modules associated to maturity, but there were only six females and two males retained in the analysis that were immature, which prevents a comparison of maturation-related transcripts between the sexes.

The ranking of module preservation levels in both the opposite sex and in Arctic Charr was often similar, suggesting evolutionary conservation for many gene co-expression modules. Even with the lower sample size in Arctic Charr, moderate and high preservation was identified for eight and three of the female modules ( $n = 14$ ), respectively, and for seven and 14 of the male modules ( $n = 25$ ), respectively. Modules preserved across species with significant phenotypic correlations may be worthwhile to investigate further for future studies regarding their contribution to phenotypes such as growth rate, reproduction, stress response, and immunity. For example, the preserved module in the male network, *turquoise*, was enriched for immunity and marginally associated with growth ( $p = 0.05$ ), phenotypes known to trade-off (Lochmiller and Deerenberg 2000; van der Most *et al.* 2010).

Many sex-biased transcripts were identified ( $n = 6,983$  transcripts) in comparison to only 154 transcripts found in sex-specific modules identified through the network comparison approach. Sex-biased expression and sex-specific networks are not always overlapping phenomena (Chen *et al.* 2016). This highlights large differences between these approaches, but in general they together provided a more comprehensive result than either in isolation. The sex bias analysis found that neither male-biased nor female biased genes were significantly overrepresented on the sex chromosome, but power to detect this may have been reduced by the use of a reference genome of a related species rather than the target species. In other species, male-biased transcripts are more often associated with migration to the sex chromosome (Rowe *et al.* 2018), and although there was a trend towards this for the highly male-biased transcripts here, it was not significant. The relationship of sex chromosomes, sex-biased gene expression and sexual dimorphism is not yet well established (Dean and Mank 2014), and this study is an example of integrating these multiple aspects for improved understanding of the role of transcriptomics in generating sex differences.

#### *Case study: modules separated by immune response type*

Separate modules were identified for immune functions involving innate antiviral genes (i.e., male *darkmagenta*) and innate immunity C-type lectins (i.e., male *steelblue*). This is of large interest considering that these types of immune responses have been observed as responding inversely to different agents, with pathogen recognition receptors (e.g. C-type lectins) potentially involved in ectoparasite defense (Sutherland, Koczka, *et al.* 2014) and being up-regulated during out-migration of steelhead trout *Oncorhynchus mykiss* smolts (Sutherland, Hanson, *et al.* 2014). In both of these observations, innate antiviral genes were suppressed. Alternately, antiviral genes were overexpressed in non-migrating fish of the same species, and were down-regulated in Pink Salmon *O. gorbuscha* infected with salmon lice relative to controls (Sutherland, Koczka, *et al.* 2014). Even if the genes are not the same between these studies and ours (i.e., no 1:1 association of orthologs has been done for these datasets), the observation of

similar functions in separate, but related, modules in the present study may indicate that these functions are hardwired into different modules given that no known infection is occurring within these samples. It is important to note that here unsigned networks were used, and therefore if the two immune response types were completely inversely regulated, they would belong to the same module, which was not observed here. These two modules may therefore not be completely under the same regulatory control as they are not completely inversely correlated. This is a new observation in the regulation of these different immune system processes in salmonids. This is an important avenue for further study given the relevance of these genes to immune responses against pathogens, and the potential response outcomes of co-infection occurring between parasitic and viral agents in nature.

The immune response modules observed here (i.e., male *darkmagenta*, *steelblue*, and *turquoise*) were all considered as highly preserved between the sexes and moderately to highly conserved in Arctic Charr. It will be valuable to see if these three modules or the genes found within them have conserved expression patterns in other species as these may have important roles in defense responses. The tissue was in a post-stress state, which could affect the induction of immune responses, and so additional observations will be valuable. It is possible that the co-expression viewed in these (and other) modules comes from the occurrence of a specific cell type that is present in different levels in the sampled tissue in different individuals. Single-cell RNA-sequencing of immune cells, or *in situ* gene expression hybridization techniques could address some of these questions. Further, to better understand the immunity related modules, it may also be valuable to use a microbe profiling platform alongside transcriptome studies of wild sampled individuals to best understand co-infection details (e.g. Miller *et al.* 2016). Nonetheless, the characterization of salmonid co-expression modules will be strengthened when additional analyses are conducted with a broader range of species, once orthologs are identified among the species.

#### *Future comparative approaches and salmonid transcriptome network evolution*

When similar datasets are produced in other salmonids, it will be valuable to identify whether the preserved modules are conserved outside of the genus *Salvelinus*. However, importantly this will require identification of 1:1 orthologs among the species, which would enable cross-species analyses. Salmonid ortholog identification across reference transcriptomes has recently been conducted for Atlantic Salmon, Brown Trout *Salmo trutta*, Arctic Charr, and European Whitefish *Coregonus lavaretus* (Carruthers *et al.* 2018), as well as Northern Pike (*Esox lucius*), Chinook Salmon (*O. tshawytscha*), Coho Salmon (*O. kisutch*), Rainbow Trout (*O. mykiss*), Atlantic Salmon, and Arctic Charr (Christensen *et al.* 2018). This type of approach, combined with non-redundant reference transcriptomes will be invaluable in future studies to enable cross species comparisons.

If modules are indeed largely conserved between species, as our study suggests within *Salvelinus* liver, this would indicate that large-scale rewiring of baseline transcription networks has not occurred since the base of the lineage. The cases where species-specific modules are found will be highly valuable to investigate regarding the transcriptional architecture potentially underlying phenotypic differences between the species. The largest amount of rediploidization is thought to have occurred in the salmonids at the base of the lineage (Kodama *et al.* 2014; Lien *et al.* 2016), although a substantial proportion of ohnologs experienced lineage-specific rediploidization post-speciation events later in evolutionary time (Robertson *et al.* 2017). Given the large potential impact that divergence in regulatory regions or epigenetic signatures can have on gene expression, one could expect large lineage-specific changes in co-expression networks. The impact of the genome duplication and rediploidization on transcriptome networks, including lineage specific changes are important avenues for future study.

## CONCLUSIONS

Co-expression networks and sex-biased expression of female and male Brook Charr liver in a reproductive season shortly after an acute handling stressor were characterized in the present study. Results support previous observations of moderate to high preservation of modules between sexes and closely related species. Highly preserved modules were involved in basic cellular functions and immune functions. Sex-specific modules identified only in the male network were enriched for transcription factor activities and associated with sex-biased or potentially sexually antagonistic phenotypes, such as body size. Higher assignment of transcripts to modules was identified in the female network, potentially due to higher inter-individual variance in gene expression and phenotypes. Important physiological functions such as immunity response types were captured by this analysis, identifying not only inverse regulation between two immunity responses but potentially decoupled regulation, which has implications for responses to co-infections and requires further study. This dataset has provided new insights into the transcriptome network structure differences between sexes and has pointed towards individual genes and gene modules that may be involved with generating sexually dimorphic phenotypes and potentially alleviating sexually antagonistic selection.

## DATA ACCESSIBILITY

Brook Charr Phylofish transcriptome assembly (Pasquier *et al.* 2016):  
<http://phylofish.sigenae.org/ngspipelines/#!/NGSPipelines/Salvelinus%20fontinalis>  
 Atlantic Salmon genome assembly (Lien *et al.* 2016):  
[https://www.ncbi.nlm.nih.gov/assembly/GCF\\_000233375.1](https://www.ncbi.nlm.nih.gov/assembly/GCF_000233375.1)

Complete and documented bioinformatics and analysis pipeline:

[https://github.com/bensutherland/sfon\\_wgcna](https://github.com/bensutherland/sfon_wgcna)

## SUPPLEMENTAL INFORMATION

**Supplemental Results.** Additional results including figures and tables that support the main text.

**Additional File S1.** All enrichment analyses for Gene Ontology biological process and molecular function categories. Includes all enrichment results with five or more genes in the category and with an enrichment  $p \leq 0.01$  (no multiple test correction), and Swissprot identifiers within the category.

**Additional File S2.** Overview table for female and male modules, including module size, trait association, GO enrichment, preservation Zsummary and medianRank, and cross-tabulation results.

**Additional File S3.** Differential expression results for the sex-bias analysis, including  $\log_2$  fold change values, p-values, identifiers and gene descriptions when available.

**Additional File S4.** Transcripts and module assignment in the female network along with Gene Significance and Module Membership values.

**Additional File S5.** Transcripts and module assignment in the male network along with Gene Significance and Module Membership values.

**Additional File S6.** Estimated counts file from eXpress used as input for network and differential expression analyses before low expression filtering and normalization.

## ACKNOWLEDGEMENTS

Thanks to Guillaume Côté for laboratory assistance, Jérémy Le Luyer and Marie Filteau for discussions about WGCNA, Eric Normandeau for discussion on gene annotation, Yann Guiguen for discussion on details of transcriptome assembly, and Aimee-Lee Houde, three anonymous reviewers and the Editor for comments on the manuscript. This work was funded by a Fonds de Recherche du Québec (FRQ) Nature et Technologies research grant awarded to Céline Audet, Louis Bernatchez, and Nadia Aubin-Horth; a grant from the Société de Recherche et de Développement en Aquaculture Continentale (SORDAC) awarded to L.B. and C.A. J.M.P. is supported by the Finnish Cultural Foundation. During this work, B.J.G.S. was supported first by a Natural Sciences and Engineering Research Council of Canada postdoctoral fellowship and subsequently by an FRQ Santé postdoctoral fellowship.



## REFERENCES

- Allendorf, F. W., and G. H. Thorgaard, 1984 Tetraploidy and the evolution of salmonid fishes, pp. 1–53 in *Evolutionary genetics of fishes*, edited by B. J. Turner. Plenum Publishing Corporation, New York.
- Barson, N. J., T. Aykanat, K. Hindar, M. Baranski, G. H. Bolstad *et al.*, 2015 Sex-dependent dominance at a single locus maintains variation in age at maturity in salmon. *Nature* 528: 405–408.
- Blackmon, H., and Y. Brandvain, 2017 Long-term fragility of Y chromosomes is dominated by short-term resolution of sexual antagonism. *Genetics* 300: 382.2017–9.
- Blanchfield, P. J., M. S. Ridgway, and C. C. Wilson, 2003 Breeding success of male brook trout (*Salvelinus fontinalis*) in the wild. *Mol. Ecol.* 12: 2417–2428.
- Bolger, A. M., M. Lohse, and B. Usadel, 2014 Trimmomatic: a flexible trimmer for Illumina sequence data. *Bioinformatics* 30: 2114–2120.
- Boula, D., V. Castric, L. Bernatchez, and C. Audet, 2002 Physiological, endocrine, and genetic bases of anadromy in the Brook Charr, *Salvelinus fontinalis*, of the Laval River (Québec, Canada). *Environ Biol Fish* 22: 229–242.
- Böhne, A., T. Sengstag, and W. Salzburger, 2014 Comparative transcriptomics in East African Cichlids reveals sex- and species-specific expression and new candidates for sex differentiation in fishes. *Genome Biology and Evolution* 6: 2567–2585.
- Bryant, D. M., K. Johnson, T. DiTommaso, T. Tickle, M. B. Couger *et al.*, 2017 A tissue-mapped Axolotl *de novo* transcriptome enables identification of limb regeneration factors. *Cell Reports* 18: 762–776.
- Bush, W. S., and J. H. Moore, 2012 Chapter 11: Genome-Wide Association Studies. *PLoS Comput Biol* 8: e1002822.
- Carruthers, M., A. A. Yurchenko, J. J. Augley, C. E. Adams, P. Herzyk *et al.*, 2018 *De novo* transcriptome assembly, annotation and comparison of four ecological and evolutionary model salmonid fish species. *BMC Genomics* 19: 32.
- Chen, C.-Y., C. M. Lopes-Ramos, M. L. Kuijjer, J. N. Paulson, A. R. Sonawane *et al.*, 2016 Sexual dimorphism in gene expression and regulatory networks across human tissues. *bioRxiv* 1–34.
- Cheviron, Z. A., and D. L. Swanson, 2017 Comparative transcriptomics of seasonal phenotypic flexibility in two North American songbirds. *Integr. Comp. Biol.* 57: 1040–1054.
- Christensen K. A., Rondeau E. B., Minkley D. R., Leong J. S., Nugent C. M., Danzmann R. G., Ferguson M. M., Stadnik A., Devlin R. H., Muzzerall R., Edwards M., Davidson W. S., Koop B. F., 2018 The Arctic charr (*Salvelinus alpinus*) genome and transcriptome assembly. *PLoS ONE* 13: e0204076–30.
- Crête-Lafrenière, A., L. K. Weir, and L. Bernatchez, 2012 Framing the Salmonidae family phylogenetic portrait: a more complete picture from increased taxon sampling. *PLoS ONE* 7: e46662.
- Dean, R., and J. E. Mank, 2014 The role of sex chromosomes in sexual dimorphism: discordance between molecular and phenotypic data. *Journal of Evolutionary Biology* 27: 1443–1453.
- Eisen, M. B., P. T. Spellman, P. O. Brown, and D. Botstein, 1998 Cluster analysis and display of genome-

wide expression patterns. *Proceedings of the National Academy of Sciences* 95: 14863–14868.

Ellegren, H., and J. Parsch, 2007 The evolution of sex-biased genes and sex-biased gene expression. *Nat Rev Genet* 8: 689–698.

Filteau, M., S. A. Pavey, J. St-Cyr, and L. Bernatchez, 2013 Gene coexpression networks reveal key drivers of phenotypic divergence in Lake Whitefish. *Molecular Biology and Evolution* 30: 1384–1396.

Fleming, I. A., 1998 Pattern and variability in the breeding system of Atlantic salmon (*Salmo salar*), with comparisons to other salmonids. *Can. J. Fish. Aquat. Sci.* 55: 59–76.

Gaiteri, C., Y. Ding, B. French, G. C. Tseng, and E. Sibille, 2014 Beyond modules and hubs: the potential of gene coexpression networks for investigating molecular mechanisms of complex brain disorders. *Genes Brain Behav.* 13: 13–24.

Garcia-Reyero, N., B. S. Jayasinghe, K. J. Kroll, T. Sabo-Attwood, and N. D. Denslow, 2018 Estrogen signaling through both membrane and nuclear receptors in the liver of Fathead Minnow. *General and Comparative Endocrinology* 257: 50–66.

Gillis, J., and P. Pavlidis, 2012 “Guilt by association” is the exception rather than the rule in gene networks. *PLoS Comput Biol* 8: e1002444.

Horreo, J. L., 2017 Revisiting the mitogenomic phylogeny of Salmoninae: new insights thanks to recent sequencing advances. *PeerJ* 5: e3828–10.

Huang, D. W., B. T. Sherman, and R. A. Lempicki, 2009 Systematic and integrative analysis of large gene lists using DAVID bioinformatics resources. *Nat Protoc* 4: 44–57.

Kodama, M., M. S. O. Briec, R. H. Devlin, J. J. Hard, and K. A. Naish, 2014 Comparative mapping between Coho Salmon (*Oncorhynchus kisutch*) and three other salmonids suggests a role for chromosomal rearrangements in the retention of duplicated regions following a whole genome duplication event. *G3 - Genes|Genomes|Genetics* 4: 1717–1730.

Langfelder, P., and S. Horvath, 2012 Fast R functions for robust correlations and hierarchical clustering. *J. Stat. Soft.* 46: 1–17.

Langfelder, P., and S. Horvath, 2008 WGCNA: an R package for weighted correlation network analysis. *BMC Bioinformatics* 9: 559.

Langfelder, P., R. Luo, M. C. Oldham, and S. Horvath, 2011 Is my network module preserved and reproducible? *PLoS Comput Biol* 7: e1001057.

Langmead, B., and S. L. Salzberg, 2012 Fast gapped-read alignment with Bowtie 2. *Nat Meth* 9: 357–359.

Li, H., B. Handsaker, A. Wysoker, T. Fennell, J. Ruan *et al.*, 2009 The Sequence Alignment/Map format and SAMtools. *Bioinformatics* 25: 2078–2079.

Lien, S., B. F. Koop, S. R. Sandve, J. R. Miller, M. P. Kent *et al.*, 2016 The Atlantic Salmon genome provides insights into rediploidization. *Nature* 533: 200–205.

- 726 Lochmiller, R. L., and C. Deerenberg, 2000 Trade-offs in evolutionary immunology: just what is the cost  
727 of immunity? *Oikos* 88: 87–98.
- 728 Mackay T. F., 2001 The genetic architecture of quantitative traits. *Annu. Rev. Genet.* 35: 303–339.
- 729 Mackay T. F. C., Stone E. A., Ayroles J. F., 2009 The genetics of quantitative traits: challenges and  
730 prospects. *Nat Rev Genet* 10: 565–577.
- 731 MacManes, M. D., 2014 On the optimal trimming of high-throughput mRNA sequence data. *Front.*  
732 *Genet.* 5: 13.
- 733 Macqueen, D. J., and I. A. Johnston, 2014 A well-constrained estimate for the timing of the salmonid  
734 whole genome duplication reveals major decoupling from species diversification. *Proceedings of the*  
735 *Royal Society B: Biological Sciences* 281: 20132881–20132881.
- 736 Mähler, N., J. Wang, B. K. Terebienieć, P. K. Ingvarsson, N. R. Street *et al.*, 2017 Gene co-expression  
737 network connectivity is an important determinant of selective constraint. *PLoS Genet* 13: e1006402.
- 738 Miller, K. M., I. A. Gardner, R. Vanderstichel, T. Burnley, S. Li *et al.*, 2016 Report on the performance  
739 evaluation of the Fluidigm BioMark platform for high-throughput microbe monitoring in salmon., 1–  
740 293 p.
- 741 Mueller, A. J., E. G. Canty-Laird, P. D. Clegg, and S. R. Tew, 2017 Cross-species gene modules emerge  
742 from a systems biology approach to osteoarthritis. *NPJ Syst Biol Appl* 3: 13.
- 743 Nicol, B., and Y. Guiguen, 2011 Expression profiling of wnt signaling genes during gonadal  
744 differentiation and gametogenesis in Rainbow Trout. *Sex Dev* 5: 318–329.
- 745 Oldham, M. C., S. Horvath, and D. H. Geschwind, 2006 Conservation and evolution of gene coexpression  
746 networks in human and chimpanzee brains. *Proceedings of the National Academy of Sciences* 103:  
747 17973–17978.
- 748 Parsch, J., and H. Ellegren, 2013 The evolutionary causes and consequences of sex-biased gene  
749 expression. *Nature Publishing Group* 14: 83–87.
- 750 Pasquier, J., C. Cabau, T. Nguyen, E. Jouanno, D. Severac *et al.*, 2016 Gene evolution and gene  
751 expression after whole genome duplication in fish: the PhyloFish database. *BMC Genomics* 17: 368.
- 752 Poley, J. D., B. J. G. Sutherland, S. R. M. Jones, B. F. Koop, and M. D. Fast, 2016 Sex-biased gene  
753 expression and sequence conservation in Atlantic and Pacific salmon lice (*Lepeophtheirus salmonis*).  
754 *BMC Genomics* 17: 483.
- 755 Prokkola, J. M., M. Nikinmaa, M. Lewis, K. Anttila, M. Kanerva *et al.*, 2018 Cold temperature represses  
756 daily rhythms in the liver transcriptome of a stenothermal teleost under decreasing day length. *J. Exp.*  
757 *Biol.* 221: jeb170670.
- 758 Qiao, Q., S. Le Manach, B. Sotton, H. Huet, E. Duvernois-Berthet *et al.*, 2016 Deep sexual dimorphism in  
759 adult medaka fish liver highlighted by multi-omic approach. *Sci. Rep.* 6: 32459.
- 760 Quinlan, A. R., and I. M. Hall, 2010 BEDTools: a flexible suite of utilities for comparing genomic  
761 features. *Bioinformatics* 26: 841–842.

762 Quinn, T. P., and C. J. Foote, 1994 The effects of body size and sexual dimorphism on the reproductive  
763 behavior of sockeye salmon, *Oncorhynchus nerka*. *Animal Behaviour* 48: 751–761.

764 R Core Team, 2018 R: A language and environment for statistical computing. R Foundation for Statistical  
765 Computing.

766 Roberts, A., and L. Pachter, 2013 Streaming fragment assignment for real-time analysis of sequencing  
767 experiments. *Nat Meth* 10: 71–73.

768 Robertson, F. M., M. K. Gundappa, F. Grammes, T. R. Hvidsten, A. K. Redmond *et al.*, 2017 Lineage-  
769 specific rediploidization is a mechanism to explain time-lags between genome duplication and  
770 evolutionary diversification. *Genome Biol.* 18: 111.

771 Robinson, M. D., and A. Oshlack, 2010 A scaling normalization method for differential expression  
772 analysis of RNA-seq data. *Genome Biol.* 11: R25.

773 Robinson, M. D., D. J. McCarthy, and G. K. Smyth, 2010 edgeR: a Bioconductor package for differential  
774 expression analysis of digital gene expression data. *Bioinformatics* 26: 139–140.

775 Rose, N. H., F. O. Seneca, and S. R. Palumbi, 2015 Gene networks in the wild: identifying transcriptional  
776 modules that mediate coral resistance to experimental heat stress. *Genome Biology and Evolution* 8:  
777 243–252.

778 Rowe, L., S. F. Chenoweth, and A. F. Agrawal, 2018 The Genomics of Sexual Conflict. *The American*  
779 *Naturalist* 192: 274–286.

780 Sauvage, C., M. Vagner, N. Derôme, C. Audet, and L. Bernatchez, 2012a Coding gene single nucleotide  
781 polymorphism mapping and quantitative trait loci detection for physiological reproductive traits in  
782 Brook Charr, *Salvelinus fontinalis*. *G3 - Genes|Genomes|Genetics* 2: 379–392.

783 Sauvage, C., M. Vagner, N. Derôme, C. Audet, and L. Bernatchez, 2012b Coding gene SNP mapping  
784 reveals QTL linked to growth and stress response in Brook Charr (*Salvelinus fontinalis*). *G3 -*  
785 *Genes|Genomes|Genetics* 2: 707–720.

786 Sreenivasan, R., J. Jiang, X. Wang, R. Bártfai, H. Y. Kwan *et al.*, 2014 Gonad differentiation in Zebrafish  
787 is regulated by the canonical wnt signaling pathway. *Biology of Reproduction* 90: e34397–10.

788 Sutherland, B. J. G., T. Gosselin, E. Normandeau, M. Lamothe, N. Isabel *et al.*, 2016 Salmonid  
789 chromosome evolution as revealed by a novel method for comparing RADseq linkage maps. *Genome*  
790 *Biology and Evolution* 8: 3600–3617.

791 Sutherland, B. J. G., K. C. Hanson, J. R. Jantzen, B. F. Koop, and C. T. Smith, 2014 Divergent immunity  
792 and energetic programs in the gills of migratory and resident *Oncorhynchus mykiss*. *Mol. Ecol.* 23:  
793 1952–1964.

794 Sutherland, B. J. G., K. W. Koczka, M. Yasuike, S. G. Jantzen, R. Yazawa *et al.*, 2014 Comparative  
795 transcriptomics of Atlantic *Salmo salar*, Chum *Oncorhynchus keta* and Pink Salmon *O. gorbuscha*  
796 during infections with salmon lice *Lepeophtheirus salmonis*. *BMC Genomics* 15: 200.

797 Sutherland, B. J. G., C. Rico, C. Audet, and L. Bernatchez, 2017 Sex chromosome evolution,  
798 heterochiasmy, and physiological QTL in the salmonid Brook Charr *Salvelinus fontinalis*. *G3 -*

Genes|Genomes|Genetics 7: 2749–2762.

Thompson, D., A. Regev, and S. Roy, 2015 Comparative analysis of gene regulatory networks: from network reconstruction to evolution. *Annu. Rev. Cell Dev. Biol.* 31: 399–428.

Tritchler, D., E. Parkhomenko, and J. Beyene, 2009 Filtering Genes for Cluster and Network Analysis. *BMC Bioinformatics* 10: 193–9.

Vainio, S., M. Heikkilä, A. Kispert, N. Chin, and A. P. McMahon, 1999 Female development in mammals is regulated by Wnt-4 signalling. *Nature* 397: 405–409.

van Dam, S., U. Vösa, A. van der Graaf, L. Franke, and J. P. de Magalhães, 2017 Gene co-expression analysis for functional classification and gene-disease predictions. *Brief Bioinform.*

van der Most, P. J., B. de Jong, H. K. Parmentier, and S. Verhulst, 2010 Trade-off between growth and immune function: a meta-analysis of selection experiments. *Functional Ecology* 25: 74–80.

van Nas, A., D. Guhathakurta, S. S. Wang, N. Yehya, S. Horvath *et al.*, 2009 Elucidating the role of gonadal hormones in sexually dimorphic gene coexpression networks. *Endocrinology* 150: 1235–1249.

Warnes, G. R., B. Bolker, L. Bonebakker, R. Gentleman, W. Hubert *et al.*, 2016 gplots: Various R Programming Tools for Plotting Data.

Wijchers, P. J., and R. J. Festenstein, 2011 Epigenetic regulation of autosomal gene expression by sex chromosomes. *Trends Genet.* 27: 132–140.

Wong, R. Y., M. M. McLeod, and J. Godwin, 2014 Limited sex-biased neural gene expression patterns across strains in Zebrafish (*Danio rerio*). *BMC Genomics* 15: 905–10.

Wright, A. E., M. Fumagalli, C. R. Cooney, N. I. Bloch, F. G. Vieira *et al.*, 2018 Male-biased gene expression resolves sexual conflict through the evolution of sex-specific genetic architecture. *Evolution Letters* 2: 52–61.

Wu, T. D., and C. K. Watanabe, 2005 GMAP: a genomic mapping and alignment program for mRNA and EST sequences. *Bioinformatics* 21: 1859–1875.

## TABLES AND FIGURES

**Table 1.** Female modules shown with the number of transcripts within the module (n), the general category of traits correlated with the module ( $p \leq 0.01$ ), the most significantly enriched Gene Ontology category (Biological Process), the Zsummary for preservation of the module in Brook Charr males (BC m) and Arctic Charr males (AC m), as well as the module quality (robustness). Zsummary  $< 2$  is not preserved,  $2 < \text{Zsummary} < 10$  is moderately preserved, and  $> 10$  is preserved. The *grey* module includes unassigned genes and the *gold* module is a random selection of 1000 genes from the assigned modules for testing preservation metrics. Full module-trait correlations are shown in Figure 2, full GO enrichment in Additional File S1, and expanded summaries of this table in Additional File S2.

| Module                | n     | Traits                                    | GO Enrichment (BP)                                                 | Preservation<br>BC m   AC m |       | Quality |
|-----------------------|-------|-------------------------------------------|--------------------------------------------------------------------|-----------------------------|-------|---------|
| <i>green</i>          | 725   | blood                                     | translation                                                        | 100                         | 24    | 75      |
| <i>blue2</i>          | 1762  | blood; liver;<br>maturity; RIN            | ribonucleoprotein complex<br>biogenesis                            | 71                          | 32    | 58.5    |
| <i>salmon</i>         | 449   | liver;<br>maturity; RIN                   | erythrocyte development                                            | 56                          | 17    | 42      |
| <i>darkorange</i>     | 805   | blood                                     | small molecule metabolic<br>process                                | 48                          | 8.8   | 36      |
| <i>lightsteelblue</i> | 77    | blood                                     | <i>none</i>                                                        | 48                          | 8.2   | 25.5    |
| <i>ivory</i>          | 451   | -                                         | ER-associated ubiquitin-<br>dependent protein catabolic<br>process | 37                          | 5.4   | 25.5    |
| <i>thistle2</i>       | 834   | maturity                                  | tissue development                                                 | 29                          | 3.6   | 36.5    |
| <i>indianred4</i>     | 1180  | blood;<br>growth; liver;<br>maturity; RIN | membrane assembly                                                  | 28                          | 2.8   | 22      |
| <i>coral1</i>         | 689   | liver;<br>maturity; RIN                   | regulation of cell growth                                          | 25                          | 5.2   | 34      |
| <i>thistle3</i>       | 235   | blood; liver;<br>size                     | inorganic anion transmembrane<br>transport                         | 24                          | 1.2   | 21      |
| <i>skyblue1</i>       | 96    | RIN                                       | intracellular signal transduction                                  | 17                          | 1.2   | 21      |
| <i>darkmagenta</i>    | 1072  | blood;<br>maturity                        | single-organism metabolic<br>process                               | 13                          | 5     | 58      |
| <i>coral2</i>         | 200   | -                                         | regulation of blood circulation                                    | 11                          | 2.8   | 14      |
| <i>grey</i>           | 5892  | Not a module                              | Not a module                                                       | 9                           | 2.4   | -18     |
| <i>gold</i>           | 1k*   | blood; size                               | Not a module                                                       | 4.8                         | 0.38  | -0.86   |
| <i>darkred</i>        | 10533 | blood                                     | protein ubiquitination                                             | 4.5                         | -0.55 | 23.5    |



**Table 2.** Male modules with the number of transcripts within the module (n), the general category of traits correlated with the module ( $p \leq 0.01$ ), the most significantly enriched Gene Ontology category (Biol. Proc.), the Zsummary for preservation of the module in Brook Charr females (BC f) and Arctic Charr males (AC m), as well as the identified module quality (robustness). Zsummary < 2 is not preserved,  $2 < \text{Zsummary} < 10$  is moderately preserved, and  $> 10$  is preserved. The *grey* module includes unassigned genes and the *gold* module is a random selection of 1000 genes from the assigned modules for testing preservation metrics. Full module-trait correlations are shown in Figure S8, full GO enrichment in Additional File 1, and expanded summaries of this table in Additional File S2.

| Module                 | n     | Traits                     | GO Enrichment (BP)                            | Preservation<br>BC f   AC m |       | Quality |
|------------------------|-------|----------------------------|-----------------------------------------------|-----------------------------|-------|---------|
| <i>yellow</i>          | 339   | blood; liver; size         | translation                                   | 58                          | 24    | 51      |
| <i>tan</i>             | 173   | blood; size                | <i>none</i>                                   | 43                          | 18    | 41.5    |
| <i>brown</i>           | 1732  | blood; sperm               | ribonucleoprotein complex biogenesis          | 38                          | 39    | 72.5    |
| <i>lightcyan</i>       | 734   | blood; size                | organic acid metabolic process                | 34                          | 21    | 69      |
| <i>magenta</i>         | 226   | <i>none</i>                | response to endoplasmic reticulum stress      | 32                          | 38    | 45      |
| <i>darkmagenta</i>     | 61    | <i>none</i>                | defense response to virus                     | 27                          | 16    | 25.5    |
| <i>darkgreen</i>       | 724   | blood; growth; liver; size | <i>none</i>                                   | 24                          | 11    | 58      |
| <i>steelblue</i>       | 65    | blood; growth; sperm       | positive regulation of innate immune response | 22                          | 6.2   | 26.5    |
| <i>violet</i>          | 64    | liver                      | sterol biosynthetic process                   | 21                          | 10    | 29.5    |
| <i>grey60</i>          | 147   | <i>none</i>                | secretion by cell                             | 20                          | 11    | 39      |
| <i>lightsteelblue1</i> | 55    | <i>none</i>                | <i>none</i>                                   | 15                          | 0.85  | 23      |
| <i>yellowgreen</i>     | 61    | blood                      | <i>none</i>                                   | 13                          | 0.24  | 24.5    |
| <i>turquoise</i>       | 783   | <i>none</i>                | immune system process                         | 12                          | 14    | 68.5    |
| <i>orangered4</i>      | 57    | sperm                      | regulation of apoptotic process               | 12                          | 2.3   | 26.5    |
| <i>floralwhite</i>     | 52    | <i>none</i>                | glutathione metabolic process                 | 11                          | 13    | 25      |
| <i>paleturquoise</i>   | 64    | blood                      | response to organonitrogen compound           | 10                          | 7.8   | 25.5    |
| <i>lightcyan1</i>      | 791   | blood; sperm               | cytokinesis                                   | 9.7                         | 11    | 67.5    |
| <i>sienna3</i>         | 61    | liver; size                | extracellular structure organization          | 9.6                         | 14    | 26.5    |
| <i>plum1</i>           | 58    | <i>none</i>                | <i>none</i>                                   | 9.6                         | 7.4   | 23.5    |
| <i>mediumpurple3</i>   | 57    | size                       | ribonucleoprotein complex assembly            | 8.4                         | 5.3   | 20.5    |
| <i>darkolivegreen</i>  | 138   | blood                      | <i>none</i>                                   | 7.6                         | 11    | 28.5    |
| <i>skyblue</i>         | 78    | RIN                        | regulation of transcription, DNA-templated    | 6.7                         | 5.8   | 28      |
| <i>grey</i>            | 17992 | <i>Not a module</i>        | <i>Not a module</i>                           | 5.5                         | 2.3   | -14     |
| <i>gold</i>            | 1k*   | <i>Not a module</i>        | <i>Not a module</i>                           | 4.9                         | 3.2   | -0.035  |
| <i>green</i>           | 334   | size                       | translation                                   | 4.5                         | 3.1   | 39      |
| <i>darkgrey</i>        | 100   | size                       | small molecule metabolic process              | 1.8                         | -0.28 | 31.5    |
| <i>ivory</i>           | 54    | blood                      | neurogenesis                                  | 0.81                        | 0.22  | 24      |

**Table 3.** Sex-biased transcript presence in modules that are either unique to each sex (low module preservation), or moderately or highly preserved, along with the number and percentage of the transcripts within each sex's sex-biased transcript category (e.g. female high sex-bias). These counts only include expressed transcripts that are assigned to modules in the network analysis for each sex.

| Sex    | Module Preservation in opposite sex | All expressed transcripts count | Moderate sex bias (1.5-4-fold) | High sex bias (>4-fold) |
|--------|-------------------------------------|---------------------------------|--------------------------------|-------------------------|
| Female | Low                                 | 0 (0%)                          | 0 (0%)                         | 0 (0%)                  |
|        | Medium                              | 9,613 (54.8%)                   | 744 (52.0%)                    | 31 (53.4%)              |
|        | High                                | 7,929 (45.2%)                   | 687 (48.0%)                    | 27 (46.6%)              |
| Total  | -                                   | 17,542                          | 1,431                          | 58                      |
| Male   | Low                                 | 147 (2.3%)                      | 19 (2.6%)                      | 0 (0%)                  |
|        | Medium                              | 1,350 (21.1%)                   | 119 (16.5%)                    | 1 (2.7%)                |
|        | High                                | 4,886 (76.5%)                   | 584 (80.9%)                    | 36 (97.3%)              |
| Total  |                                     | 6,383                           | 722                            | 37                      |

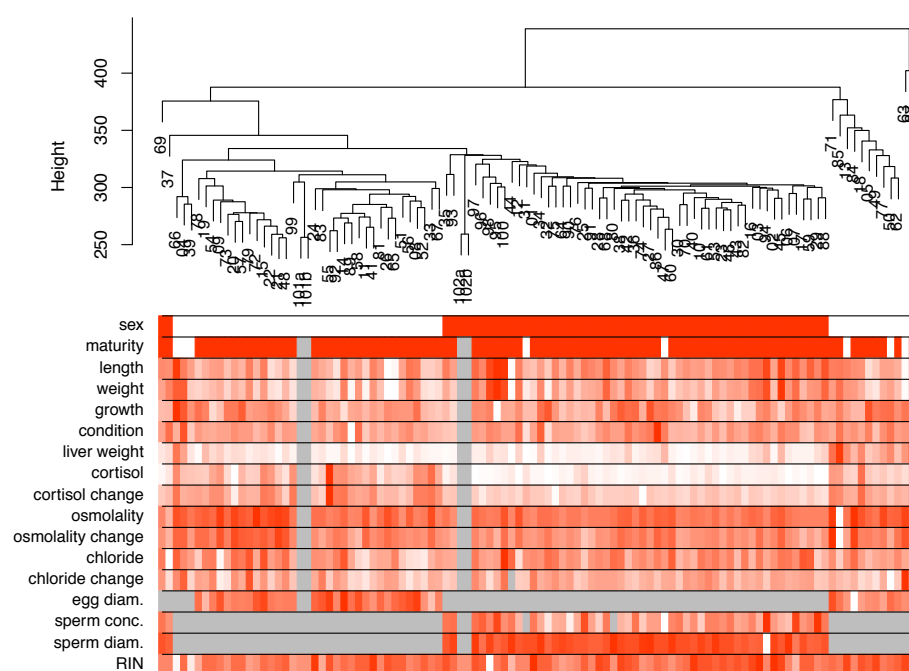

**Figure 1.** Brook Charr individual samples clustered by gene expression similarity in the liver using all genes with corresponding quantitative trait values shown in the heatmap below the dendrogram with intensity of red reflecting the normalized trait value for that sample. Sex was the largest factor affecting the data (see heatmap sex row; white = females; red = males). Parents were sequenced in duplicate, and clustered with the offspring of their respective sex (see 101ab for mother and 102ab for father; parents have grey missing data values for all phenotypes but sex and RIN). Females with large liver weight clustered outside the other female samples (see on the right-hand side on the liver weight row), and were removed as they were considered outliers (see Methods).

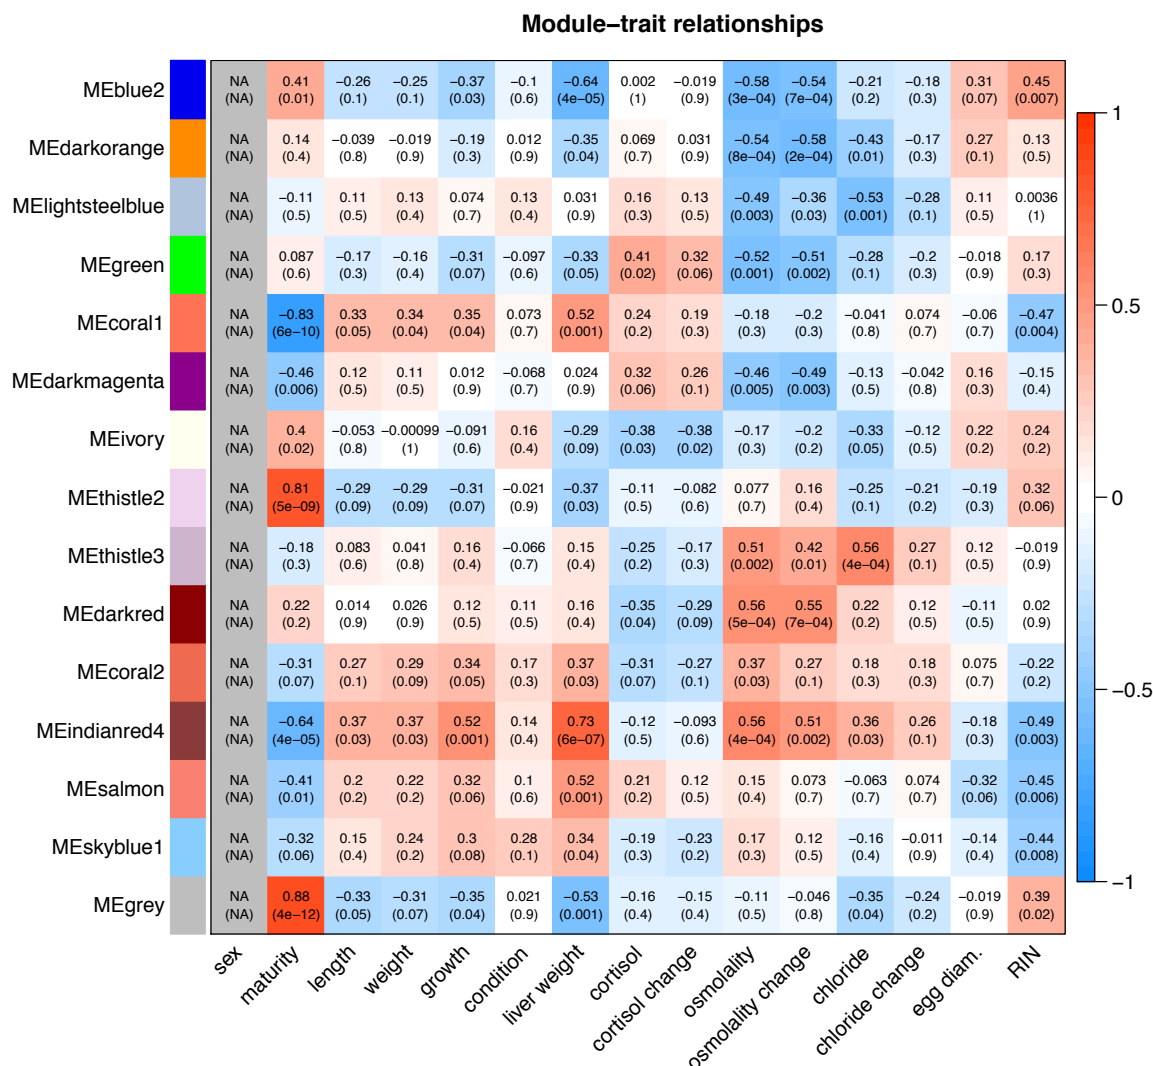

**Figure 2.** Module-trait relationships for Brook Charr females, including Pearson correlation r-value and p-values. The boldness of color indicates the strength of the relationship. Module-trait correlations are also shown in Table 1 with more general grouping of traits alongside other metrics such as module size and enriched Gene Ontology categories. The male network module-trait relationships are shown in Figure S8.

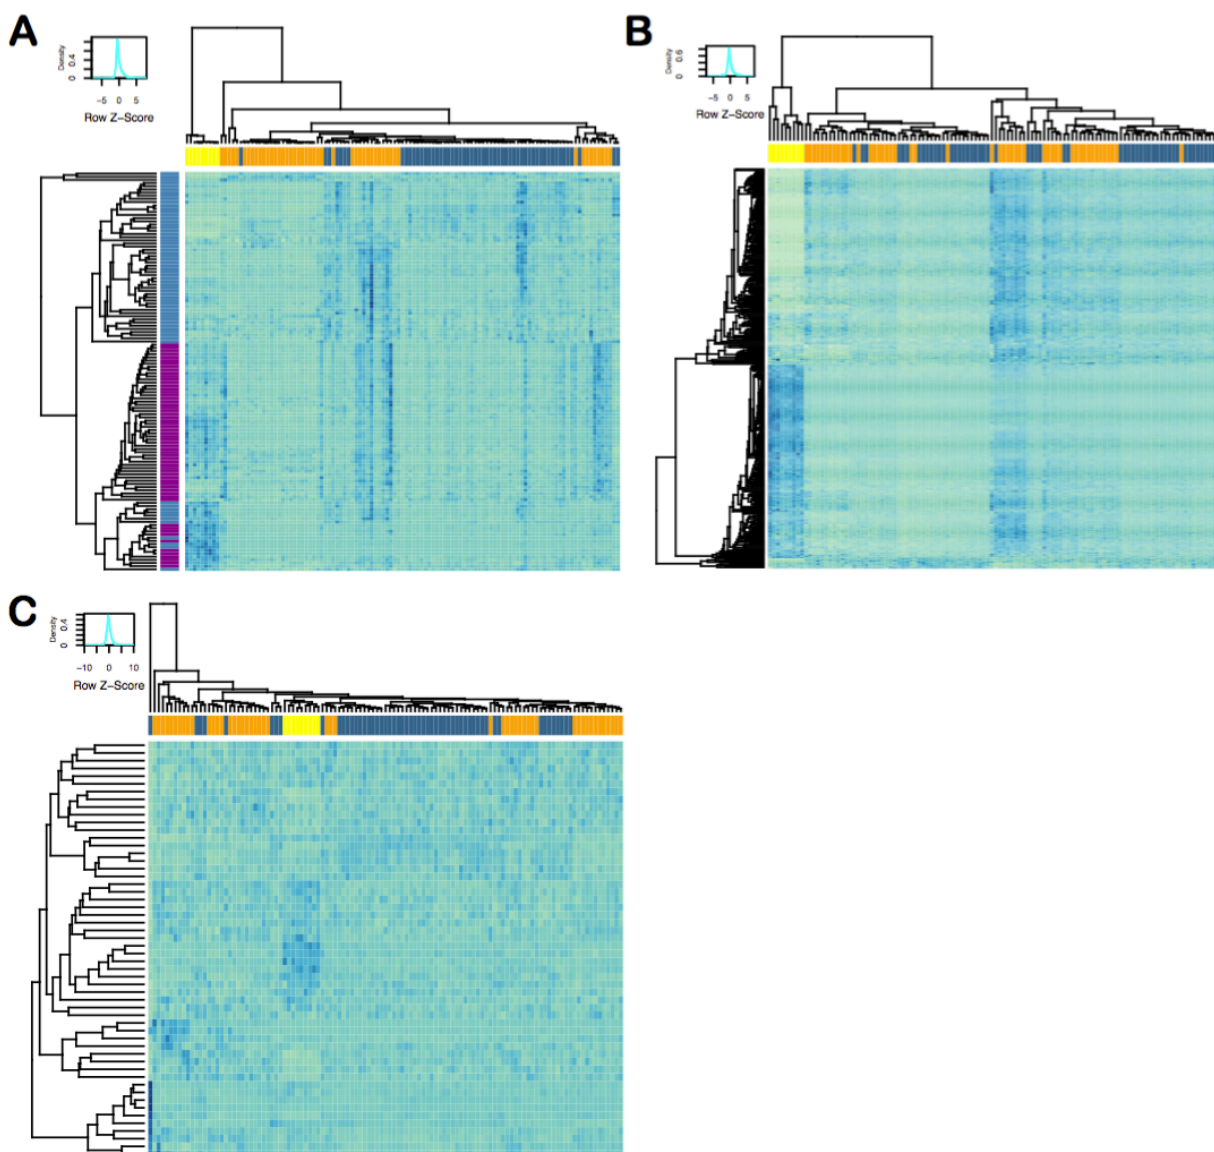

**Figure 3.** Heatmaps of expression of transcripts within (A) two immunity-related male modules, *steelblue* and *darkmagenta*, which are related to innate immunity and innate antiviral immunity, respectively, (B) the preserved male module *yellow* (translation), and (C) the male-specific *ivory* (transcription factor activity). Samples are shown on the horizontal with Brook Charr females (orange), Brook Charr males (blue), and Arctic Charr males (in yellow). Transcripts from multiple modules in (A) are coloured according to the module (*steelblue*, *darkmagenta*). The normalized expression values are shown within the heatmap.
