1 **Sex-specific co-expression networks and sex-biased gene expression in the**  
2 **salmonid Brook Charr *Salvelinus fontinalis***

3 Ben J. G. Sutherland<sup>1†\*</sup>, Jenni M. Prokkola<sup>2</sup>, Céline Audet<sup>3</sup>, and Louis Bernatchez<sup>1</sup>

4 <sup>1</sup> Institut de Biologie Intégrative et des Systèmes (IBIS), Université Laval, Québec, QC G1V 0A6, Canada

5 <sup>2</sup> Institute of Integrative Biology, University of Liverpool, L69 7ZB Liverpool, UK

6 <sup>3</sup> Institut des Sciences de la Mer de Rimouski, Université du Québec à Rimouski, Rimouski, QC G5L  
7 3A1, Canada

8 †Current Address: Pacific Biological Station, Fisheries and Oceans Canada, Nanaimo, BC, V9T 6N7,  
9 Canada

10

11 \*Author for correspondence: BJGS

12 Pacific Biological Station, Fisheries and Oceans Canada, Nanaimo, BC, Canada

13 Phone: 1 (250) 751-4676

14 Email: ben.sutherland.1@ulaval.ca (BS)

15

16

17

18 **Data Deposition:** Brook Charr raw sequence data has been uploaded to SRA under BioProject

19 PRJNA445826, accession SRP136537. Arctic Charr raw sequence data is available under BioProject

20 PRJNA307980, accession SRP068854.

21  
22  
23  
24  
25  
26  
27  
28  
29  
30  
31  
32  
33  
34  
35  
36  
37  
38  
39  
40  
  
41  
42  
43  
44  
45  
46  
47  
48  
49  
50

## ABSTRACT

Networks of co-expressed genes produce complex phenotypes associated with functional novelty. Sex differences in gene expression levels or in the structure of gene co-expression networks can cause sexual dimorphism and may resolve sexually antagonistic selection. Here we used RNA-sequencing in the paleopolyploid salmonid Brook Charr *Salvelinus fontinalis* to characterize sex-specific co-expression networks in the liver of 47 female and 53 male offspring. In both networks, modules were characterized for functional enrichment, hub gene identification, and associations with 15 growth, reproduction, and stress-related phenotypes. Modules were then evaluated for preservation in the opposite sex, and in the congener Arctic Charr *Salvelinus alpinus*. Overall, more transcripts were assigned to a module in the female network than in the male network, which coincided with higher inter-individual gene expression and phenotype variation in the females. Most modules were preserved between sexes and species, including those involved in conserved cellular processes (e.g. translation, immune pathways). However, two sex-specific male modules were identified, and these may contribute to sexual dimorphism. To compare with the network analysis, differentially expressed transcripts were identified between the sexes, finding a total of 16% of expressed transcripts as sex-biased. For both sexes, there was no overrepresentation of sex-biased genes or sex-specific modules on the putative sex chromosome. Sex-biased transcripts were also not overrepresented in sex-specific modules, and in fact highly male-biased transcripts were enriched in preserved modules. Comparative network analysis and differential expression analyses identified different aspects of sex differences in gene expression, and both provided new insights on the genes underlying sexual dimorphism in the salmonid Brook Charr.

**Keywords:** Co-expression; Salmonid; Sex-bias; Sexual Dimorphism; Transcriptomics; Weighted Gene Co-expression Network Analysis (WGCNA)

51

## INTRODUCTION

52 Understanding how sex bias in gene expression contributes to sexually dimorphic phenotypes, and how  
53 this affects fitness is an important area of study to understand genotype-phenotype interactions (Parsch  
54 and Ellegren 2013). The development of sex differences in phenotypes can be attributed to differences in  
55 the expression of both sex-specific and autosomal genes, caused by hormonal and epigenetic effects  
56 (Ellegren and Parsch 2007; Wijchers and Festenstein 2011), heterogamy and imperfect dosage  
57 compensation (Parsch and Ellegren 2013), epistatic interactions, and transcriptional network structural  
58 differences (Chen *et al.* 2016). Sex-biased gene expression is pervasive in many species and may alleviate  
59 sexually antagonistic selection, i.e., the selection for different phenotypes in the different sexes (Wright *et*  
60 *al.* 2018; Rowe *et al.* 2018). Transcriptome regulatory architecture differences between the sexes may  
61 contribute to the development of sex-biased gene expression (Chen *et al.* 2016; Wright *et al.* 2018). Sex-  
62 biased expression underlies much of phenotypic sexual dimorphism, which can occur without sexually  
63 antagonistic selection (e.g. imperfect dosage compensation; Parsch and Ellegren 2013). To connect alleles  
64 to phenotypes, typically association studies are applied (Mackay, 2001; Bush and Moore 2012), but these  
65 bypass important intermediate regulatory steps such as transcriptome regulation (Mackay *et al.* 2009). To  
66 characterize transcriptome regulation, it is important to consider the underlying structure of the network  
67 in which genes are co-regulated (Mähler *et al.* 2017).

68 Constructing gene co-expression networks is often based on correlating transcript abundance  
69 across samples (Langfelder and Horvath 2008). A network is comprised of modules, each of which is  
70 comprised of a group of genes with correlated expression patterns. Co-expression clustering is a valuable  
71 approach to classify and visualize transcriptomic data (Eisen *et al.* 1998). Clustering often groups genes  
72 together that have similar cellular functions and regulatory pathways (Eisen *et al.* 1998), although this is  
73 not always the case (Gillis and Pavlidis 2012; van Dam *et al.* 2017). Module functions can be predicted  
74 based on phenotypic correlations (Filteau *et al.* 2013; Rose *et al.* 2015) or functional enrichment analysis  
75 (e.g. Gene Ontology). Genes that are highly connected and central to a module (i.e., hub genes) may be  
76 upstream regulators of the module, and potentially more related to the module function (van Dam *et al.*  
77 2017). Hub genes may also be under higher selective constraint than other less connected genes, and as a  
78 result may show lower genetic variation and higher phylogenetic conservation (Mähler *et al.* 2017).  
79 Network information thus provides novel insight into both gene activity and evolution.

80 Comparative network analysis across species can advance the understanding of species-specific  
81 innovations. For example, comparing brain transcriptome networks between chimpanzee *Pan troglodytes*  
82 and human *Homo sapiens* indicates low preservation of modules found in specific brain regions  
83 associated with human evolution such as the cerebral cortex (Oldham *et al.* 2006). Comparing networks  
84 can highlight potential drivers of phenotypic changes associated with adaptive divergence that can lead to

85 ecological speciation (Filteau *et al.* 2013; Thompson *et al.* 2015). Cross-species network comparisons  
86 have also been used to detect gene modules associated with disease (Mueller *et al.* 2017) or with seasonal  
87 phenotypic changes (Cheviron and Swanson 2017). These insights are often not possible to obtain  
88 through standard gene-by-gene differential expression analysis, which captures a smaller proportion of  
89 the variation than differential co-expression analysis (Oldham *et al.* 2006; Gaiteri *et al.* 2014).

90 Network comparisons can also provide insight on sex differences (Chen *et al.* 2016). Differing  
91 structure of networks between the sexes may resolve sexual antagonism through gene regulation (Chen *et*  
92 *al.* 2016). Other genetic architecture solutions to this conflict may include sex-dependent dominance  
93 (Barson *et al.* 2015) or maintaining alleles associated with sexual antagonism on sex chromosomes  
94 (Blackmon and Brandvain 2017). Comparisons between the sexes are complicated by the fact that sex  
95 bias in networks can be tissue-specific, with modules more preserved between sexes in brain and muscle  
96 networks than in liver or adipose tissue (van Nas *et al.* 2009; Wong *et al.* 2014). Liver tissue is considered  
97 a highly sexually dimorphic tissue, particularly in oviparous species at a reproductive stage (Qiao *et al.*  
98 2016). Although the extent of differences may depend on the tissue of study, network comparisons  
99 between sexes can provide new insight into the regulatory underpinnings of sexual dimorphism and  
100 antagonism.

101 Salmonids are an important species of commercial, ecological, and cultural value. This species  
102 group is also a model system for studying genome evolution after a whole genome duplication event that  
103 occurred approx. 60-88 million years ago (Allendorf and Thorgaard 1984; Crête-Lafrenière *et al.* 2012;  
104 Macqueen and Johnston 2014). Charr (*Salvelinus* spp.) are a phenotypically diverse group within Family  
105 Salmonidae that are less characterized in terms of transcriptomic and genomic data than other genera (e.g.  
106 *Salmo* or *Oncorhynchus*; but see Christensen *et al.* 2018). Brook Charr *Salvelinus fontinalis* is a primarily  
107 freshwater species native to Eastern North America. Arctic Charr *S. alpinus* has a circumpolar distribution  
108 mainly in the Arctic, and these two lineages diverged approximately 10 million years ago (Horreo 2017).  
109 Sexual dimorphism in body size and secondary sexual characteristics is associated with reproductive  
110 success in Brook Charr and other salmonids (Quinn and Foote 1994). The largest males are typically  
111 dominant and fertilize the majority of a brood (Blanchfield *et al.* 2003). However, smaller sneaker males  
112 can also contribute in fertilization, albeit to a lesser extent than the large male. In females however, large  
113 body size is more constrained as it is highly associated to fecundity, and smaller life history variants are  
114 not expected (reviewed by Fleming 1998). With different optimal reproductive-associated phenotypes  
115 between the sexes, this could give rise to sexual dimorphism as well as sexual antagonism.

116 Here we profile liver transcriptomes of 100 Brook Charr offspring from a single family by RNA-  
117 sequencing to characterize co-expression patterns. Transcriptome profiling was conducted shortly (3 h)  
118 after the application of an acute handling stressor to all individuals during the reproductive season,

119 increasing variance among individuals. The goals of this study are to i) characterize the sex-specific or  
120 preserved modular structure of gene co-expression in liver tissue in Brook Charr; ii) characterize module  
121 preservation in the congener Arctic Charr to investigate evolutionary conservation of the networks; iii)  
122 connect phenotype and functional category associations to the identified modules; and iv) integrate results  
123 from the network analyses with a gene-by-gene differential expression analysis to determine whether the  
124 two methods provide different insights on sexual dimorphism in transcriptome architecture.

125

126

## METHODS

### *Animals and sample collection*

127  
128 Brook Charr used in this study were originally used to construct a low-density genetic map for  
129 reproductive (Sauvage, Vagner, Derôme, Audet, and Bernatchez 2012a), growth and stress response QTL  
130 analyses (Sauvage, Vagner, Derôme, Audet, and Bernatchez 2012b). They were used to construct a high-  
131 density genetic map that was integrated with the other salmonids (Sutherland *et al.* 2016), then used to  
132 identify QTL, sex-specific recombination rates, and the Brook Charr sex chromosome (Sutherland *et al.*  
133 2017). The 192 F<sub>2</sub> individuals were full sibs from a single family resulting from a cross of an F<sub>1</sub> female  
134 and F<sub>1</sub> male that were from an F<sub>0</sub> female from a wild anadromous population (Laval River, near  
135 Forestville, Québec) and an F<sub>0</sub> male from a domestic population (Québec aquaculture over 100 years).

136 F<sub>2</sub> offspring were raised until 65-80 g and then 21 phenotypes were collected along with several  
137 repeat measurements to determine growth rate. Full details on these phenotypes are previously described  
138 (Sauvage *et al.* 2012a, 2012b), including sex-specific phenotype averages, standard deviations, and  
139 phenotype correlations for all 192 offspring (see Table S1 and Figure S2 from Sutherland *et al.* 2017).  
140 The 15 phenotypes used in the present study to correlate with co-expression modules were maturity,  
141 length, weight, growth rate, condition factor, liver weight, post-stress cortisol, osmolality and chloride,  
142 change in cortisol, osmolality and chloride between one week before and three hours after an acute  
143 handling stress, egg diameter, sperm concentration, and sperm diameter. Fish were anaesthetized with 3-  
144 aminobenzoic acid ethyl ester and killed by decapitation as per regulations of Canadian Council of  
145 Animal Protection recommendations approved by the University Animal Care Committee, as previously  
146 reported (Sauvage *et al.* 2012a). A total of 87% of the 47 females and 96% of the 53 males used for  
147 transcriptome profiling were in a reproductive state at the time of the dissection, which was in the fall  
148 (smolting occurs in this strain in the spring; Boula *et al.* 2002). Phenotypic sex was determined by gonad  
149 inspection (Sauvage *et al.* 2012b). Immediately after decapitation, liver tissue was excised, flash frozen  
150 then kept at -80 °C until RNA extraction.

151

152 *RNA extraction and library preparation*

153 A total of 100 of the 192 individuals were used for liver transcriptome profiling. Prior to extraction,  
154 samples were assigned random order to reduce batch effects on any specific group of samples. Total RNA  
155 was extracted from equal sized pieces of liver tissue from approximately the same location on the liver for  
156 all samples (0.4 x 0.2 x 0.2 cm; ~1 mg). This piece was rapidly immersed in 1 ml TRIzol (Invitrogen),  
157 then placed on dry ice until all samples per batch were prepared (6-12 per extraction round). When all  
158 samples were ready, the samples immersed in frozen TRIzol were allowed to slightly thaw for  
159 approximately 1 min until beads within the vials were able to move, then the samples were homogenized  
160 for 3 min at 20 hz, rotated 180°, and homogenized again for 3 min at 20 hz on a MixerMill (Retsch). The  
161 homogenate was centrifuged at 12,000 x g for 10 min at 4 °C. The supernatant was transferred to a new 2  
162 ml tube and incubated for 5 min at room temperature. Chloroform (200 µl) was added to the tube, the tube  
163 was shaken vigorously for 15 s and incubated 3 min at room temperature, then centrifuged at 12,000 x g  
164 for 15 min at 4 °C. Finally the aqueous layer was carefully transferred to a new centrifuge tube, and into  
165 an RNeasy spin column (QIAGEN), as per manufacturer's instructions with the optional on-column  
166 DNase treatment. All samples were quality checked using a BioAnalyzer (Agilent), where all samples had  
167 RIN ≥ 8.3 (mean = 9.5), and were quantified using spectrophotometry on a Nanodrop-2000 (Thermo  
168 Scientific).

169 Libraries were prepared using 1 µg of total RNA in the randomized order using TruSeq RNA  
170 Sample Prep Kit v2 (Illumina) to generate cDNA as per manufacturer's instructions using adapters from  
171 both Box A and Box B, AMPure XP beads (Agencourt) and a magnetic plate in batches of 8-16 samples  
172 per batch. Fragmentation times of 2, 4 and 6 min were tested for optimal size fragmentation and  
173 consistency, and as a result of this test, all samples were processed using a 6 min fragmentation time.  
174 PCR amplification to enrich cDNA was performed using 15 cycles, as per manufacturer's instructions.  
175 All libraries were quantified using Quant-iT PicoGreen (ThermoFisher) and quality-checked using the  
176 BioAnalyzer on High Sensitivity chips (Agilent) for consistent size profiles. Once all samples were  
177 confirmed to be high quality and of approximately the same insert size, eight individually tagged samples  
178 were pooled in equimolar quantities (80 ng per sample) and sent to McGill Sequencing Center for 100 bp  
179 single-end sequencing on a HiSeq2000 (Illumina; total = 13 lanes). Parents (F<sub>1</sub> individuals) were  
180 sequenced in duplicate in two separate lanes.

181

182 *RNA-seq mapping*

183 Quality trimming and adapter removal was performed using Trimmomatic (Bolger et al. 2014), removing  
184 adapters with the *-illuminaclip* (2:30:10) option and removing low quality reads (< Q2) using *-*  
185 *slidingwindow* (20:2), *-leading* and *-trailing* options. Q2 was used for optimal quantification as previously

186 demonstrated (MacManes 2014). A reference transcriptome for Brook Charr was obtained from the  
187 Phylofish database (Pasquier *et al.* 2016). Trimmed reads were mapped against the reference  
188 transcriptome with *bowtie2* (Langmead and Salzberg 2012) using *--end-to-end* mode reporting multiple  
189 alignments (*-k* 40) for optimal use with eXpress for read count generation (Roberts and Pachter 2013).  
190 The multiple alignment file was converted to bam format and sorted by read name using SAMtools (Li *et*  
191 *al.* 2009) and input to eXpress (see full bioinformatics pipeline in *Data Accessibility*).

192 Read counts were imported into edgeR (Robinson *et al.* 2010) for normalization and low  
193 expression filtering. The smallest library (lib87, 8,373,387 aligned reads) was used to calculate a low-  
194 expression threshold. A count-per-million threshold of 10 reads per transcript in this library defined the  
195 threshold for transcript retention ( $\text{cpm} > 1.19$ ), as suggested in the edgeR documentation. Any transcript  
196 passing this threshold in at least five individuals was retained through the first filtering step for initial data  
197 visualization and annotation. Additional low expression filtering was conducted in the differential  
198 expression analysis and network analysis (see below). Although transcripts were previously annotated in  
199 the Phylofish database (Pasquier *et al.* 2016), each transcript was re-annotated using *trinode* (Bryant *et*  
200 *al.* 2017) and *tblastx* against Swissprot ( $\text{cutoff} = 1e^{-5}$ ) to obtain as many identifiers as possible for Gene  
201 Ontology enrichment analysis. For individual gene descriptions, the re-annotated Swissprot identifier was  
202 used primarily, and the Phylofish annotation secondarily.

203

#### 204 *Differential expression analysis between sexes*

205 To reduce the number of transcripts with very low expression in the differential expression analysis, we  
206 applied a low expression filter of  $\text{cpm} > 1.19$  in at least 65% of the individuals from each sex (i.e.  $\geq 31 /$   
207  $47$  females or  $35 / 53$  males). The data was then normalized using the weighted trimmed mean of M-  
208 values (TMM Robinson and Oshlack 2010) to generate normalized  $\log_2$  expression levels. Using  
209 *model.matrix* from edgeR with sex as the data grouping, a genewise negative binomial generalized linear  
210 model (*glmFit*) was fit to each gene. Genes with false discovery rate of  $\leq 0.05$  and linear fold-change  $\geq$   
211  $1.5$  were defined as differentially expressed. These genes were binned into low sex bias (i.e.  $1.5 \leq \text{FC} \leq 4$ )  
212 or high sex bias (i.e.  $\text{FC} > 4$ ) for each sex (negative FC for females, positive for males), as per previous  
213 delimitations (Poley *et al.* 2016).

214

#### 215 *Weighted gene co-expression network analysis (WGCNA) in Brook Charr*

216 To best estimate associations between modules and phenotypes of interest, sexes were analyzed  
217 separately, and then the preservation of each module was evaluated in the opposite sex (Langfelder *et al.*  
218 2011). Due to the independent analysis of each sex, low expression filters (i.e.  $\text{cpm} > 0.5$  in at least five  
219 individuals) were conducted separately in each sex, then the data normalized as described above. The

220 average library size was 27,896,535 alignments, indicating cpm > 0.5 corresponds to at least 13.95 reads  
221 aligning to the transcript for this mean library size. Sex-specific data was used as an input for weighted  
222 gene correlation network analysis (WGCNA; Langfelder and Horvath 2008; 2012) in R (R Core Team  
223 2018).

224 Within each sex, sample outliers were detected and removed by clustering samples based on  
225 transcript expression by Euclidean distance and visually inspecting relationships with the *hclust* average  
226 agglomeration method of WGCNA (Langfelder and Horvath 2008). Removal of outliers prevents  
227 spurious correlations of modules due to outlier values and improves network generation (Langfelder *et al.*  
228 2011). Remaining samples were then correlated with trait data using *plotDendroAndColors*. Network  
229 parameters for both female and male networks were defined as per tutorials using unsigned correlation  
230 networks (Langfelder and Horvath 2008). Unsigned networks consider the connectivity between identical  
231 positive or negative correlations to be equal, and thus genes in the same module may have similar or  
232 inverse expression patterns. An optimal soft threshold power (6) was identified by evaluating effects on  
233 the scale free topology model fit and mean connectivity by increasing the threshold power by 1 between  
234 1-10 and by 2 between 12-20 (Figure S1), as suggested by Langfelder and Horvath (2008). An unsigned  
235 adjacency matrix was generated in WGCNA to identify the 25,000 most connected transcripts to retain  
236 for reducing computational load. Then, to further minimize noise and spurious associations, adjacency  
237 relationships were transformed to the Topological Overlap Matrix using the *TOMdist* function  
238 (Langfelder and Horvath 2008).

239 Similarity between modules was evaluated using module eigengenes (i.e. the first principal  
240 component of the module). Dissimilarity between eigengenes was calculated by signed Pearson  
241 correlation as suggested by Langfelder and Horvath (2008) and plotted using *hclust*. When modules were  
242 more than 0.75 correlated (dissimilarity 0.25), they were merged as suggested by Langfelder and Horvath  
243 (2008). Merged module eigengenes were then tested for associations with phenotypes by Pearson  
244 correlation. Notably the sign of the correlation does not necessarily indicate the direction of the  
245 relationship between the expression of specific genes in each module and the phenotype because the  
246 modules were built using unsigned networks.

247 Module membership (i.e., the module eigengene-gene correlation) was used to define the top  
248 central transcripts for each module (i.e., hub genes). Gene significance (i.e., the absolute value of the trait-  
249 gene correlation) was calculated for each transcript against traits weight, specific growth rate, condition  
250 factor, hepatosomatic index, change in cortisol, osmolality and chloride from the brief handling stressor,  
251 female egg diameter, and male sperm concentration and diameter. Module eigengenes were tested for  
252 correlation against traits using Pearson correlation ( $p \leq 0.01$ ).



253 Gene Ontology enrichment analysis of transcripts within each module was conducted using the  
254 re-annotated Swissprot identifiers in DAVID Bioinformatics (Huang *et al.* 2009). Heatmaps for modules  
255 of interest were generated by using the package *gplots* using the normalized  $\log_2$  cpm data (Warnes *et al.*  
256 2016). Expression values were standardized across samples for each transcript and Pearson correlation  
257 was used to cluster transcripts and samples.

258 To determine sex-specific or sex-conserved modules, module preservation was evaluated by  
259 comparing male transcript expression to the generated female modules, and visa-versa, using the  
260 *modulePreservation* function of WGCNA. A total of 200 permutations of randomly assigned module  
261 labels were used to calculate module preservation rank and Zsummary (Langfelder *et al.* 2011). Low  
262 Zsummary scores indicate no preservation ( $\leq 2$ ), intermediate indicate moderate preservation (2-10) and  
263 high scores ( $\geq 10$ ) indicate strong module preservation (Langfelder *et al.* 2011). The similarity in ranking  
264 of modules in terms of preservation in the two different comparative networks (i.e., the opposite sex in  
265 Brook Charr and the male Arctic Charr data) was performed by testing the correlation of the module  
266 preservation statistic using Spearman rank correlation in R. Module quality was also determined for each  
267 module as a measure of module robustness that is characterized by conducting the analysis on multiple  
268 random subsets of the original data (Langfelder *et al.* 2011). In addition, cross-tabulation of the  
269 proportions of female modules in male modules and visa-versa were performed in R. Cross-tabulation  
270 requires similar modular structures of the compared networks, whereas adjacency comparisons directly  
271 compare co-expression independent of network topology. All pipelines to analyze the current data are  
272 documented and available on GitHub (see *Data Accessibility*).

### 273 274 *Module preservation in Arctic Charr*

275 To compare module preservation between Brook Charr and Arctic Charr *S. alpinus* we used RNA-seq  
276 data from 1+ year-old Arctic Charr. The broodstock of this population was reared in hatchery conditions  
277 for three generations after being collected from a subarctic, land-locked population in Finland (Lake  
278 Kuolimo, 61°16' N; 27°32' E). The data were collected from nine male liver samples (fish relatedness not  
279 known) from each of 8 °C and 15 °C (total = 18 samples), but due to a large effect of temperature on the  
280 transcriptome, and differences between sampling times in the 15 °C group, only the nine samples from the  
281 8 °C, group were used here (normal rearing temperature during summer at the fish hatchery; Figure S2)  
282 (Prokkola *et al.* 2018). Fish body mass at 8°C was on average 24.2 g  $\pm$  standard deviation (S.D.) 10.4 g.

283 Sample processing was explained fully by Prokkola et al (2018) and briefly described here. In  
284 August 2013, fish were euthanized using 200 ppm sodium bicarbonate-buffered tricaine methanesulfonate  
285 (MS-222), after which liver samples were collected and flash frozen in liquid nitrogen (Prokkola *et al.*  
286 2018). RNA was extracted from approximately 10 mg of liver tissue using Tri-reagent (Molecular

287 Research Center), and quality checked using a BioAnalyzer (Agilent), with an average identified RNA  
288 integrity number of 9.95. Strand-specific cDNA library preparation and sequencing were conducted at  
289 Beijing Genomics Institute (BGI Hong Kong) using TruSeq RNA Sample Prep Kit v2 (illumina) and  
290 sequenced on an Illumina HiSeq2000 instrument to generate paired-end 100 bp reads. All samples were  
291 pooled with unique barcodes across four sequencing lanes. Adapters were removed at BGI, and reads  
292 trimmed with Trimmomatic (Bolger et al. 2014) using options *leading* and *trailing* (5) *slidingwindow*  
293 (4:15) and *minlen* (36). From samples included in this study, on average  $41.7 \pm$  S.D. 7.4 million reads  
294 were obtained.

295 Transcript expression was calculated as above, including using the Brook Charr reference  
296 transcriptome for ease of cross-species comparisons. Low expression filtering and normalization for the  
297 Arctic Charr data was conducted as above (cpm > 0.5 in at least five individuals). However, a network  
298 was not constructed for these samples. Using samples from both temperatures, modules were previously  
299 identified (Prokkola *et al.* 2018). Once normalized and input to WGCNA, read counts in Arctic Charr 8°C  
300 samples were used to build a gene adjacency matrix, which was then compared against modules generated  
301 for female and male Brook Charr samples using the *modulePreservation* function as described above.  
302 Caveats regarding this data should be noted, including the smaller sample size, immature state of Arctic  
303 Charr, minor differences in rearing environments (albeit both were reared in hatchery conditions), and  
304 unknown relatedness.

305

### 306 *Identifying one transcript per gene and assigning chromosome positions*

307 The Brook Charr reference transcriptome (Pasquier *et al.* 2016) possibly contains multiple isoforms for  
308 individual genes (Y. Guiguen, *pers. comm.*). Therefore an approach was taken here to reduce multiple  
309 genes to a single transcript per gene for enrichment analyses on the sex chromosome or in sex-specific  
310 modules. First, the Brook Charr reference transcriptome was aligned to the Atlantic salmon *Salmo salar*  
311 chromosome-level genome assembly RefSeq GCF\_000233375.1 (Lien *et al.* 2016) using GMAP (Wu and  
312 Watanabe 2005). Alignments were converted to an indexed bam retaining only high quality (-q 30)  
313 alignments using samtools (Li *et al.* 2009). The indexed bam was converted to a bed file using bedtools  
314 *bamtobed* (Quinlan and Hall 2010). Second, the lengths of Brook Charr transcripts were calculated using  
315 custom python scripts (see *Data Accessibility*). With the alignment position, lengths, and expression  
316 status (expressed or not expressed), a single transcript per contiguous (or overlapping) alignment block on  
317 the reference genome was retained using a custom R script (see *Data Accessibility*). For each contiguous  
318 alignment block, this script preferentially retained the longest, expressed transcript. All other redundant  
319 transcripts, and all that did not align, were not retained. In some cases, a single transcript can align to

320 multiple locations with high mapping quality ( $\text{MAPQ} \geq 30$ ). Since there was no reason to retain one  
321 alignment over another, both alignments were retained in the baseline set for these cases.

322 The alignment information per retained Brook Charr transcript was used to assign an Atlantic  
323 Salmon chromosome identifier to each retained unique transcript. The chromosome information was  
324 combined with the module information for all transcripts in each sex-specific network. This analysis was  
325 conducted separately for females and males, as expressed genes were in some cases different between the  
326 two sexes and therefore so would be the selection of which transcript to retain. The correspondence  
327 between the Atlantic Salmon genome assembly accession identifier and the Atlantic Salmon chromosome  
328 identifier were obtained from the NCBI genome assembly website (see *Data Accessibility*). In general,  
329 correspondence of gene synteny is expected to be similar between Atlantic Salmon and Brook Charr  
330 (Sutherland *et al.* 2016). Using the chromosome correspondence table in Sutherland *et al.* (2016), the  
331 Atlantic Salmon chromosome containing the sex chromosome of Brook Charr was identified. For each  
332 sex-specific co-expression module, the proportions of Brook Charr genes located on the Atlantic Salmon  
333 chromosome that corresponds to the Brook Charr sex chromosome were characterized and compared to  
334 the total list of all non-redundant Brook Charr transcripts identified. Fisher exact tests were then used to  
335 determine significance for each sex-specific module-sex chromosome combination (i.e., two tests). The  
336 chromosome information was also combined with the sex bias fold change values. Finally, the proportion  
337 of highly or moderately sex-biased transcripts for females and males were investigated for  
338 overrepresentation on the sex chromosome and in sex-specific or conserved modules using Fisher's exact  
339 tests in custom R scripts (see *Data Availability*).

340

341

## RESULTS

342 *Transcriptome overview*

343 Of the total 69,440 transcripts in the Brook Charr reference transcriptome, 51,911 passed initial low  
344 expression filters when using all samples together. Low-expression filtering for differential expression  
345 analysis (i.e., expressed in at least 65% of individuals from one of two sexes) resulted in the retention of  
346 42,622 transcripts. Low-expression filtering for sex-specific network analysis (i.e., expressed in at least  
347 five individuals of the sex of interest) resulted in 50,748 and 50,530 transcripts passing filters in females  
348 and males, respectively. When considering each sex individually, most of the expressed genes were  
349 expressed in a majority of the samples: females expressed 35,461 transcripts in > 90% of the samples;  
350 males expressing 35,714 transcripts in > 90% of the samples (Figure S3).

351 Hierarchical clustering of samples by gene expression indicated a large effect of sex, where 35 of  
352 47  $F_2$  females clustered with the  $F_1$  female, and 52 of 53  $F_2$  males were clustered together with the  $F_1$  male  
353 (Figure 1). As described in the Methods, outliers were removed to avoid spurious network correlations

354 (Langfelder *et al.* 2011), and this included the removal of one male leaving 52 males remaining, and the  
355 removal of one group of females that had large liver weight, leaving 35 females remaining (see phenotype  
356 liver weight in Figure 1; Figure S4). When these outlier samples were included while constructing the  
357 female network, many modules correlated with the liver weight phenotype (*data not shown*), suggesting  
358 that these samples were having a large impact on the network.

359 Interestingly, females displayed higher inter-individual variance in gene expression than males, as  
360 indicated by the multiple smaller sample clusters of females in the hierarchical clustering relative to the  
361 fewer and larger sample clusters of the males (Figure 1). Likewise, six of the phenotypic traits also  
362 displayed higher variance in females (significant heteroscedasticity at  $P < 0.05$ , Levene's test): liver  
363 weight, cortisol level, osmolality, and change in cortisol, osmolality and chloride levels due to handling  
364 (Figure S5). Some of the higher variance in these traits in females was likely explained by maturity, but  
365 maturity did not explain all of the variance within the female gene expression, as the different sample  
366 clusters observed had a variety of maturity states, and samples that were all determined to be mature were  
367 present in different sample clusters (Figure 1). In the following, the sex-specific networks will be  
368 presented and compared against the alternate sex and the congener Arctic Charr.

369

#### 370 *Network construction and phenotype correlations: female Brook Charr*

371 Highly correlated module eigengenes ( $r > 0.75$ ) were merged, combining 81 modules into 14 (Figure  
372 S6A; Figure S7A). Assigned female modules each contained a range of 77-10,533 transcripts (Table 1).  
373 The largest module was *darkred*, with 10,533 transcripts (see Table 1), which included more transcripts  
374 than even the unassigned *grey* module (second largest; 5,892 transcripts).

375 Correlations of module eigengenes with specific phenotypes ( $n = 15$ ) indicate potential functional  
376 associations of the modules (Table 1; Figure 2). The strongest associations of phenotypes to modules  
377 were with maturity index, for example with *thistle2* ( $r > 0.81$ ), and *corall* ( $r = -0.83$ ). Although the large  
378 liver weight outlier samples were removed prior to network generation, liver weight remained highly  
379 correlated with *indianred4* ( $r = 0.73$ ), *salmon*, *coral* ( $r = 0.52$ ), and *blue2* ( $r = -0.64$ ). Growth rate showed  
380 similar module correlations to liver weight (Figure 2). Osmolality change was also correlated with  
381 *indianred4* ( $r = 0.56$ ) and *blue2* ( $r = -0.58$ ), as well as with *darkred*, *thistle3* ( $r \geq 0.51$ ), *darkorange*, *green*  
382 and *darkmagenta* ( $r \geq |-0.49|$ ). Chloride change had no significant associations, but post-stress chloride  
383 was correlated with *thistle3* ( $r = 0.56$ ) and *lightsteelblue* ( $r = -0.53$ ). Although no modules were  
384 significantly associated with cortisol (change or post-stress;  $p \geq 0.01$ ), *ivory* was close ( $r = -0.38$ ;  $p =$   
385 0.03).

386 In order to understand the gene composition of modules, Gene Ontology functional enrichment  
387 analysis of the transcripts within each module was conducted (Table 1; Additional File S1). The *salmon*

388 module (correlated with liver weight) was enriched for erythrocyte development. The *blue2* module (liver  
389 weight) was associated with ribonucleoprotein complex. *Darkorange*, *green*, and *darkmagenta* modules  
390 (all correlated with osmolality change) were enriched for small molecular metabolic process, translation  
391 and metabolism functions, respectively. One module did not have significant enrichment of biological  
392 processes, *lightsteelblue* (correlated with chloride change).

393

#### 394 *Preservation of co-expression: female Brook Charr network*

395 The preservation of co-expression of female Brook Charr modules in Brook Charr males was primarily  
396 evaluated using network adjacency comparisons, which are more sensitive and robust than cross-  
397 tabulation methods (Langfelder *et al.* 2011). Most female modules were preserved in males and only  
398 *darkred* had weak evidence for preservation (Table 1). *Green* was the most conserved ( $Z_{\text{summary}} = 100$ ),  
399 followed by *blue2*, *salmon*, *lightsteelblue* and *darkorange* ( $Z_{\text{summary}} \geq 48$ ; Table 1). Modules associated  
400 with translation activities were among the highest conserved modules (e.g. *green* and *blue2*).

401 Published male Arctic Charr liver transcriptome data was then compared to the network to  
402 evaluate cross-species module preservation (Prokkola *et al.* 2018). Even with caveats regarding sample  
403 size (see Methods), several female Brook Charr modules were highly preserved in Arctic Charr males,  
404 including *blue2* ( $Z_{\text{summary}} = 34$ ), *green* ( $Z_{\text{summary}} = 24$ ), and *salmon* ( $Z_{\text{summary}} = 17$ ), also the most  
405 conserved in male Brook Charr (Table 1). Other female Brook Charr modules with moderate evidence for  
406 preservation in male Arctic Charr included *darkorange* and *lightsteelblue* ( $Z_{\text{summary}} > 8$ ), which were  
407 also highly preserved in male Brook Charr. It is noteworthy that the ranking of preservation of female  
408 modules in the Arctic Charr and Brook Charr males is highly similar (Table 1; Spearman  $\rho=0.895$ ;  $p <$   
409  $0.00005$ ; Figure S8).

410

#### 411 *Network construction, phenotype correlations, and sex-specificity: male Brook Charr*

412 Highly correlated male modules (eigene correlation  $r > 0.75$ ) were merged, reducing 44 assigned male  
413 modules to 25 (Figure S6B; Figure S7B). Unlike the female network, a large proportion of the male data  
414 could not be assigned to a module. The unassigned *grey* module contained 72% of the analyzed  
415 transcripts (17,992 transcripts). Assigned modules each contained between 54-1,732 transcripts (Table 2;  
416 Additional File S2). Phenotypic correlations with male module eigengenes were tested (Figure S9; see  
417 Supplemental Results; summarized in Table 2). Of note were several modules enriched for immunity-  
418 related functions, including *darkmagenta* (defense response to virus) and *steelblue* (positive regulation of  
419 innate immune response) (Table 2 and Additional File S1). These two immune processes were found to  
420 belong to different modules that were not just inversely regulated but rather having somewhat decoupled  
421 regulation, given that the network constructed was unsigned and thus the sign of the correlation does not

422 affect whether the genes are grouped (Figure 3A). However, these modules were still correlated even if  
423 not grouped into a single module (Figure S7B).

424 Preservation of male modules in females was also evaluated, but in contrast to what was observed  
425 in the preservation of female modules in males (see above), many of the male modules were weakly to  
426 moderately preserved in the females. Highly preserved modules included *yellow* ( $Z_{\text{summary}} = 58$ ; Figure  
427 3B) and *brown* ( $Z_{\text{summary}} = 38$ ), *tan* ( $Z_{\text{summary}} = 43$ ), and *lightcyan* ( $Z_{\text{summary}} = 34$ ). Some modules  
428 were less preserved, and therefore more sex-specific, than even the randomly generated *gold* module  
429 (Table 2) and the unassigned *grey* module, including *green* (translation and size;  $Z_{\text{summary}} = 4.5$ ),  
430 *darkgrey* (mitochondrial membrane;  $Z_{\text{summary}} = 1.8$ ) and *ivory* (transcription factor activity;  $Z_{\text{summary}}$   
431  $= 0.8$ ; Figure 3C). Preserved modules *yellow* and *brown* were enriched for ribosomal or translation-  
432 related functions, as was the more sex-specific *green* module (Table 2). *Ivory*, the most sex- and species-  
433 specific male module (see below; Table 2; Figure 3C) was enriched for neurogenesis in GO biological  
434 process, but also transcription factor activity in GO molecular function (Additional File S1). Other non-  
435 preserved or lowly preserved modules were enriched for membrane activity including *darkgrey*  
436 (mitochondrial inner membrane) and *lightcyan1* (membrane organization; Additional File S1).  
437 Preservation of male Brook Charr modules was also explored in Arctic Charr males. Similar to that  
438 observed in the female modules, when a male Brook Charr module was preserved in female Brook Charr,  
439 it was also often preserved in male Arctic Charr (Table 2; Spearman  $\rho=0.69$ ;  $p < 0.0005$ ; Figure S8).

440  
441 *Sex-biased transcripts, sex-specific modules, and the sex chromosome*

442 To further understand the relation between sex-bias in gene expression and sex-specificity in network  
443 architecture, a gene-by-gene differential expression analysis between the sexes was conducted. Of the  
444 42,622 expressed transcripts, 6,983 (16.4%) were differentially expressed ( $FC \geq 1.5$ ;  $\text{glmFit FDR} \leq 0.05$ ).  
445 Female-biased genes included 3,989 moderately (1.5-4-fold) and 236 highly biased (>4-fold) transcripts.  
446 Highly biased transcripts included known sex-biased genes such as *vitellogenin*, and *zona pellucida*  
447 *sperm-binding proteins*. Male-biased genes included 2,638 moderately and 120 highly biased transcripts,  
448 including *semaphorin-3F* (most highly male-biased transcript). For a complete list, see Additional File  
449 S3.

450 Interestingly, sex-biased transcripts were not overrepresented in female or male sex-specific  
451 modules (Table 3). However, unexpectedly, highly male-biased genes were overrepresented in highly  
452 preserved modules (36 transcripts in highly preserved modules, 97% of the highly sex-biased transcripts)  
453 in comparison to the overall percentage in the network (4,886 transcripts in highly preserved modules,  
454 76.5% of network transcripts; Table 3; two-sided Fisher's exact test  $p = 0.0013$ ). The female data was  
455 more similar between the highly sex-biased transcripts and the entire network (45.2% and 46.6%,

456 respectively). Sex-specific modules were not enriched on the sex chromosome (Fisher's exact test  $p >$   
457 0.5), including male modules *ivory* and *darkgrey* (Table S1).

458 Of the 47 non-overlapping, highly male-biased transcripts assigned to chromosomes, five were on  
459 the sex chromosome (10.6%), relative to 779 on the sex chromosome of the 12,934 expressed in males  
460 (Ssa09; 6.0%). However, this difference was not significant (one-tailed Fisher's exact test  $p = 0.15$ ).  
461 Furthermore, moderately male-biased transcripts were not enriched on the sex chromosome (5.3%)  
462 relative to all expressed transcripts (6%), nor were highly or moderately female-biased transcripts (high  
463 bias = 4.1%; moderate bias = 5.8%).

464

465

## DISCUSSION

466 Gene co-expression produces complex phenotypes and may underlie key aspects of phenotypic evolution  
467 (Filteau *et al.* 2013) and sexual dimorphism (Chen *et al.* 2016). One of the main challenges in producing  
468 females and males is developing different phenotypes from largely the same set of genes (Rowe *et al.*  
469 2018). Transcriptome architecture may provide a solution to this challenge. In this study, co-expression  
470 networks for both female and male Brook Charr liver transcriptomes were characterized and compared to  
471 each other. Although the female network had much higher module assignment of expressed transcripts, in  
472 general most modules were preserved between the sexes. Two sex-specific modules were identified in  
473 males that may provide insight on the evolution of gene expression and phenotypic sexual dimorphism.  
474 Sex bias was observed in 16% of the expressed transcripts, and surprisingly these sex-biased transcripts  
475 were not overrepresented in sex-specific modules. This indicates the value of using these two different  
476 approaches given that different information was obtained from each.

477

### *Sex differences in co-expression networks and cross-species preservation*

478 Females and males clustered distinctly in unsupervised clustering by gene expression, as has been  
479 observed in other studies of fish liver at a reproductive stage (Qiao *et al.* 2016). Interestingly, there was a  
480 large difference in the number of transcripts assigned to modules between the sexes; of the 25 k most  
481 connected transcripts, females had 76% transcripts assigning to a module, and males only 28%.  
482 Importantly, this observation coincides with higher inter-individual variation in gene expression in  
483 females than in males (Figure 1) and higher inter-individual variation in six phenotypes in females than in  
484 males (Figure S5). When inter-individual variation in gene expression is low, transcripts will not be as  
485 well clustered, because without variance there can be no co-variance for clustering algorithms to act upon  
486 (Tritchler *et al.* 2009). Therefore, the lower variance in male gene expression may have resulted in the  
487 observed lower module assignment. The observation of lower variation in phenotypes is an interesting  
488 result that highlights similarities between transcriptomic and phenotypic expression. Building networks in  
489

490 both sexes allowed for the identification of this lower assignment to modules in males, which may have  
491 not been noted otherwise, as female modules generally were scored as preserved in males. Furthermore,  
492 this allowed the identification of many male network modules with seemingly important and different  
493 functional associations that in the female network were all grouped together into one very large module  
494 (i.e., *darkred*). The reason for the grouping of these multiple male modules all together into a single  
495 female module is not clear, but could be due to an increased effect of maturity on the data in females that  
496 may be swamping out the other more subtle covariances in the data. This further indicates the value of  
497 doing separate analyses in each sex, in order to avoid signal being overwhelmed by phenotypes that  
498 impact the data more in one sex than the other. It will be valuable to inspect sex-specific module  
499 generation in other salmonids and in tissues other than liver to understand the generality of these sex  
500 differences and associations to inter-individual variance in gene expression and phenotypes.

501 Our observations confirm previous findings that co-expression patterns are often preserved  
502 between sexes or closely related species (van Nas *et al.* 2009; Wong *et al.* 2014; Cheviron and Swanson  
503 2017). Here, highly preserved modules between the sexes were often comprised of genes within pathways  
504 involved in conserved functions. The most preserved modules between the sexes and species were  
505 involved in basic cellular processes and included many co-expressed subunits of a multiple subunit  
506 protein complex, such as translation machinery. Multiple subunits and functionally related genes have  
507 long been known to cluster together by co-expression (Eisen *et al.* 1998). Immunity-related modules were  
508 also preserved between the sexes, with co-expression patterns similar to those observed previously in  
509 salmonids (Sutherland, Koczka, *et al.* 2014). Considering the importance of immune function to both  
510 sexes, it is not surprising that immunity modules are preserved between sexes.

511 The male-specific module *darkgrey* and the lowly preserved *green* module were both associated  
512 with size, which can be sexually dimorphic in salmonids and is associated to breeding success in males  
513 (Blanchfield *et al.* 2003). In comparison, no female modules were associated to length and weight, further  
514 suggesting that these more male-specific modules could have a role in producing a sexually dimorphic  
515 phenotype. The other male-specific module, *ivory*, may contribute to sexual dimorphism and resolution of  
516 sexual antagonism by being an upstream controller of different programs, as it is enriched for  
517 transcription factor activity and hub genes as putative transcription factors. Hub genes of *ivory* include  
518 genes from the *wnt* protein family. Wnt signaling is associated with gonad differentiation and shows sex-  
519 specific expression in several studies in mammals and fish (Vainio *et al.* 1999; Nicol and Guiguen 2011;  
520 Sreenivasan *et al.* 2014; Böhne *et al.* 2014). Future studies could investigate whether transcription factors  
521 from the sex-specific *ivory* module control expression of transcripts found to be sex-biased here once  
522 transcription factor binding sites are characterized in this species.



523 The presence of sex-specific modules and sexually dimorphic gene expression in the liver  
524 corresponds with what is known about sex hormones produced in the gonads, as these hormones have  
525 been shown to regulate a significant proportion of the liver transcriptome in mouse (van Nas *et al.* 2009).  
526 In a large-scale transcriptome study in humans, the liver was not one of the most sexually dimorphic in  
527 terms of sex-biased genes (Chen *et al.* 2016). In oviparous species at a reproductive stage however, this  
528 tissue is highly sexually dimorphic, given the role in females for producing oocyte constituents (e.g.  
529 *vitellogenins*, *zona pellucida* proteins) (Qiao *et al.* 2016). Some of the strongest phenotypic associations  
530 of female modules were to maturity. These associations may reflect the effects of sex hormones such as  
531 estradiol, which controls reproduction and has a strong influence on transcription in fish (Garcia-Reyero  
532 *et al.* 2018). There were no male modules associated to maturity, but there were only six females and two  
533 males retained in the analysis that were immature, which prevents a comparison of maturation-related  
534 transcripts between the sexes.

535 The ranking of module preservation levels in both the opposite sex and in Arctic Charr was often  
536 similar, suggesting evolutionary conservation for many gene co-expression modules. Even with the lower  
537 sample size in Arctic Charr, moderate and high preservation was identified for eight and three of the  
538 female modules ( $n = 14$ ), respectively, and for seven and 14 of the male modules ( $n = 25$ ), respectively.  
539 Modules preserved across species with significant phenotypic correlations may be worthwhile to  
540 investigate further regarding their contribution to phenotypes such as growth rate, reproduction, stress  
541 response, and immunity. For example, the preserved module in the male network, *turquoise*, was enriched  
542 for immunity and marginally associated with growth ( $p = 0.05$ ), phenotypes known to trade-off  
543 (Lochmiller and Deerenberg 2000; van der Most *et al.* 2010).

544 Many sex-biased transcripts were identified ( $n = 6,983$  transcripts), but only 154 transcripts were  
545 found in sex-specific modules identified through the network comparison approach. Sex-biased  
546 expression and sex-specific networks are not always overlapping phenomena (Chen *et al.* 2016). This  
547 highlights the large differences between these approaches, but in general they together provided a more  
548 comprehensive result than either in isolation. The sex bias analysis found that neither male-biased nor  
549 female biased genes were significantly overrepresented on the sex chromosome, but power to detect this  
550 may have been reduced by the use of a reference genome of a related species rather than the target  
551 species. In other species, male-biased transcripts are more often associated with migration to the sex  
552 chromosome (Rowe *et al.* 2018), and although there was a trend towards this for the highly male-biased  
553 transcripts here, it was not significant. The relationship of sex chromosomes, sex-biased gene expression  
554 and sexual dimorphism is not yet well established (Dean and Mank 2014), and this study is an example of  
555 integrating these multiple aspects for improved understanding of the role of transcriptomics in generating  
556 sex differences.

557

558 *Case study: modules separated by immune response type*

559 To demonstrate the utility of this network approach in investigating specific phenotypes, the following is  
560 an analysis of modules associated with immunity in the male network. Separate modules were identified  
561 for immune functions involving innate antiviral genes (i.e., male *darkmagenta*) and innate immunity C-  
562 type lectins (i.e., male *steelblue*). This is of large interest considering that these types of immune  
563 responses have been observed to respond inversely, where pathogen recognition receptors (e.g. C-type  
564 lectins) are up-regulated and innate antiviral genes down-regulated in the anterior kidney during  
565 ectoparasite infection (Sutherland, Koczka, *et al.* 2014) and pathogen recognition receptors are up-  
566 regulated and innate antiviral genes are down-regulated in gill tissue during out-migration of steelhead  
567 trout *Oncorhynchus mykiss* smolts (Sutherland, Hanson, *et al.* 2014). Even if the genes are not the same  
568 between these studies and ours (i.e., no 1:1 association of orthologs has been done for these datasets), the  
569 observation of similar functions in two different modules in the present study may indicate that these  
570 functions are hardwired into different modules given that no known infection is occurring within these  
571 samples. It is important to note that here unsigned networks were used, and therefore if the two immune  
572 response types were completely inversely regulated, they would belong to the same module, which was  
573 not observed here. These two modules may therefore not be completely under the same regulatory control  
574 as they are not completely inversely correlated. This is a new observation in the regulation of these  
575 different immune system processes in salmonids. This is an important avenue for further study given the  
576 relevance of these genes to immune responses against pathogens, and the potential response outcomes of  
577 co-infection occurring between parasitic and viral agents in nature.

578 The immune response modules observed here (i.e., male *darkmagenta*, *steelblue*, and *turquoise*)  
579 were all considered as highly preserved between the sexes and moderately to highly conserved in Arctic  
580 Charr. It will be valuable to see if these three modules or the genes within them have conserved  
581 expression patterns in other species as these may have important roles in defense responses. The tissue  
582 was in a post-stress state, which could affect the induction of immune responses, and so additional  
583 observations, such as in a resting state, will be valuable. It is possible that the co-expression viewed in  
584 these (and other) modules comes from the occurrence of a specific cell type that is present in different  
585 levels in the sampled tissue in different individuals. Single-cell RNA-sequencing of immune cells, or *in*  
586 *situ* gene expression hybridization techniques could address some of these questions. Further, to better  
587 understand the immunity related modules, it may also be valuable to use a microbe profiling platform  
588 alongside transcriptome studies of wild sampled individuals to best understand co-infection details (e.g.  
589 Miller *et al.* 2016). Nonetheless, the characterization of salmonid co-expression modules will be

590 strengthened when additional analyses are conducted with a broader range of species, once orthologs are  
591 identified among the species.

592

### 593 *Future comparative approaches and salmonid transcriptome network evolution*

594 When similar datasets are produced in other salmonids, it will be valuable to identify whether the  
595 preserved modules are conserved outside of the genus *Salvelinus*. However, importantly this will require  
596 identification of 1:1 orthologs among the species, which would enable cross-species analyses. Salmonid  
597 ortholog identification across reference transcriptomes has recently been conducted for Atlantic Salmon,  
598 Brown Trout *Salmo trutta*, Arctic Charr, and European Whitefish *Coregonus lavaretus* (Carruthers *et al.*  
599 2018), as well as Northern Pike (*Esox lucius*), Chinook Salmon (*O. tshawytscha*), Coho Salmon (*O.*  
600 *kisutch*), Rainbow Trout (*O. mykiss*), Atlantic Salmon, and Arctic Charr (Christensen *et al.* 2018). This  
601 type of approach, combined with non-redundant reference transcriptomes will be invaluable in future  
602 studies to enable cross species comparisons.

603         If modules are indeed largely conserved between species, as our study suggests within *Salvelinus*  
604 liver, this would indicate that large-scale rewiring of baseline transcription networks has not occurred  
605 since the base of the lineage. Species-specific modules will be highly valuable to investigate to better  
606 understand transcriptional architecture underlying phenotypic differences between the species. The largest  
607 amount of rediploidization is thought to have occurred in the salmonids at the base of the lineage  
608 (Kodama *et al.* 2014; Lien *et al.* 2016), although a substantial proportion of ohnologs experienced  
609 lineage-specific rediploidization post-speciation events later in evolutionary time (Robertson *et al.* 2017).  
610 Given the large potential impact that divergence in regulatory regions or epigenetic signatures can have  
611 on gene expression, one could expect large lineage-specific changes in co-expression networks. The  
612 impact of the genome duplication and rediploidization on transcriptome networks, including lineage  
613 specific changes are important avenues for future study.

614

## 615 **CONCLUSIONS**

616 Co-expression networks and sex-biased expression of female and male Brook Charr liver in a  
617 reproductive season shortly after an acute handling stressor were characterized in the present study.  
618 Results support previous observations of moderate to high preservation of modules between sexes and  
619 closely related species. Highly preserved modules were involved in basic cellular functions and immune  
620 functions. Sex-specific modules identified only in the male network were enriched for transcription factor  
621 activities and associated with sex-biased or potentially sexually antagonistic phenotypes, such as body  
622 size. Higher assignment of transcripts to modules was identified in the female network, potentially due to  
623 higher inter-individual variance in gene expression and phenotypes. Important physiological functions

624 such as immunity response types were captured by this analysis, identifying not only inverse regulation  
625 between two immunity responses but potentially decoupled regulation, which has implications for  
626 responses to co-infections and requires further study. This dataset has provided new insights into the  
627 transcriptome network structure differences between sexes and has pointed towards individual genes and  
628 gene modules that may be involved with generating sexually dimorphic phenotypes and potentially  
629 alleviating sexually antagonistic selection.

630

### 631 **DATA ACCESSIBILITY**

632 Brook Charr Phylofish transcriptome assembly (Pasquier *et al.* 2016):

633 <http://phylofish.sigenae.org/ngspipelines/#!/NGSpipelines/Salvelinus%20fontinalis>

634 Atlantic Salmon genome assembly (Lien *et al.* 2016):

635 [https://www.ncbi.nlm.nih.gov/assembly/GCF\\_000233375.1](https://www.ncbi.nlm.nih.gov/assembly/GCF_000233375.1)

636 Complete and documented bioinformatics and analysis pipeline:

637 [https://github.com/bensutherland/sfon\\_wgcna](https://github.com/bensutherland/sfon_wgcna)

638

### 639 **SUPPLEMENTAL INFORMATION**

640 **Supplemental Results.** Additional results including figures and tables that support the main text.

641 **Additional File S1.** All enrichment analyses for Gene Ontology biological process and molecular  
642 function categories. Includes all enrichment results with five or more genes in the category and with an  
643 enrichment  $p \leq 0.01$  (no multiple test correction), and Swissprot identifiers within the category.

644 **Additional File S2.** Overview table for female and male modules, including module size, trait  
645 association, GO enrichment, preservation Zsummary and medianRank, and cross-tabulation results.

646 **Additional File S3.** Differential expression results for the sex-bias analysis, including  $\log_2$  fold change  
647 values, p-values, identifiers and gene descriptions when available.

648 **Additional File S4.** Transcripts and module assignment in the female network along with Gene  
649 Significance and Module Membership values.

650 **Additional File S5.** Transcripts and module assignment in the male network along with Gene  
651 Significance and Module Membership values.

652 **Additional File S6.** Estimated counts file from eXpress used as input for network and differential  
653 expression analyses before low expression filtering and normalization.

654 **Additional File S7.** Interpretation file providing all phenotypes for each sample, used in the analysis  
655 pipeline.

656

657

## ACKNOWLEDGEMENTS

658 Thanks to Guillaume Côté for laboratory assistance, Jérémy Le Luyer and Marie Filteau for discussions  
659 about WGCNA, Eric Normandeau for discussion on gene annotation, Yann Guiguen for discussion on  
660 details of transcriptome assembly, Phineas Hamilton for statistical discussion, and Aimee-Lee Houde,  
661 three anonymous reviewers and the Editors for comments on the manuscript. This work was funded by a  
662 Fonds de Recherche du Québec (FRQ) Nature et Technologies research grant awarded to Céline Audet,  
663 Louis Bernatchez, and Nadia Aubin-Horth; a grant from the Société de Recherche et de Développement  
664 en Aquaculture Continentale (SORDAC) awarded to L.B. and C.A. J.M.P. is supported by the Finnish  
665 Cultural Foundation. During this work, B.J.G.S. was supported first by a Natural Sciences and  
666 Engineering Research Council of Canada postdoctoral fellowship and subsequently by an FRQ Santé  
667 postdoctoral fellowship.

668

669

## REFERENCES

- 670 Allendorf, F. W., and G. H. Thorgaard, 1984 Tetraploidy and the evolution of salmonid fishes, pp. 1–53  
671 in *Evolutionary genetics of fishes*, edited by B. J. Turner. Plenum Publishing Corporation, New York.
- 672 Barson, N. J., T. Aykanat, K. Hindar, M. Baranski, G. H. Bolstad *et al.*, 2015 Sex-dependent dominance  
673 at a single locus maintains variation in age at maturity in salmon. *Nature* 528: 405–408.
- 674 Blackmon, H., and Y. Brandvain, 2017 Long-term fragility of Y chromosomes is dominated by short-  
675 term resolution of sexual antagonism. *Genetics* genetics.300382.2017–9.
- 676 Blanchfield, P. J., M. S. Ridgway, and C. C. Wilson, 2003 Breeding success of male brook trout  
677 (*Salvelinus fontinalis*) in the wild. *Mol. Ecol.* 12: 2417–2428.
- 678 Bolger, A. M., M. Lohse, and B. Usadel, 2014 Trimmomatic: a flexible trimmer for Illumina sequence  
679 data. *Bioinformatics* 30: 2114–2120.
- 680 Boula, D., V. Castric, L. Bernatchez, and C. Audet, 2002 Physiological, endocrine, and genetic bases of  
681 anadromy in the Brook Charr, *Salvelinus fontinalis*, of the Laval River (Québec, Canada). *Environ*  
682 *Biol Fish* 22: 229–242.
- 683 Böhne, A., T. Sengstag, and W. Salzburger, 2014 Comparative transcriptomics in East African Cichlids  
684 reveals sex- and species-specific expression and new candidates for sex differentiation in fishes.  
685 *Genome Biology and Evolution* 6: 2567–2585.
- 686 Bryant, D. M., K. Johnson, T. DiTommaso, T. Tickle, M. B. Couger *et al.*, 2017 A tissue-mapped Axolotl  
687 *de novo* transcriptome enables identification of limb regeneration factors. *Cell Reports* 18: 762–776.
- 688 Bush, W. S., and J. H. Moore, 2012 Chapter 11: Genome-Wide Association Studies. *PLoS Comput Biol*  
689 8: e1002822.
- 690 Carruthers, M., A. A. Yurchenko, J. J. Augley, C. E. Adams, P. Herzyk *et al.*, 2018 *De novo*  
691 transcriptome assembly, annotation and comparison of four ecological and evolutionary model  
692 salmonid fish species. *BMC Genomics* 19: 32.
- 693 Chen, C.-Y., C. M. Lopes-Ramos, M. L. Kuijjer, J. N. Paulson, A. R. Sonawane *et al.*, 2016 Sexual  
694 dimorphism in gene expression and regulatory networks across human tissues. *bioRxiv* 1–34.
- 695 Cheviron, Z. A., and D. L. Swanson, 2017 Comparative transcriptomics of seasonal phenotypic flexibility  
696 in two North American songbirds. *Integr. Comp. Biol.* 57: 1040–1054.
- 697 Christensen K. A., Rondeau E. B., Minkley D. R., Leong J. S., Nugent C. M., Danzmann R. G., Ferguson  
698 M. M., Stadnik A., Devlin R. H., Muzzerall R., Edwards M., Davidson W. S., Koop B. F., 2018 The  
699 Arctic charr (*Salvelinus alpinus*) genome and transcriptome assembly. *PLoS ONE* 13: e0204076–30.
- 700 Crête-Lafrenière, A., L. K. Weir, and L. Bernatchez, 2012 Framing the Salmonidae family phylogenetic  
701 portrait: a more complete picture from increased taxon sampling. *PLoS ONE* 7: e46662.
- 702 Dean, R., and J. E. Mank, 2014 The role of sex chromosomes in sexual dimorphism: discordance between  
703 molecular and phenotypic data. *Journal of Evolutionary Biology* 27: 1443–1453.
- 704 Eisen, M. B., P. T. Spellman, P. O. Brown, and D. Botstein, 1998 Cluster analysis and display of genome-

- 705 wide expression patterns. *Proceedings of the National Academy of Sciences* 95: 14863–14868.
- 706 Ellegren, H., and J. Parsch, 2007 The evolution of sex-biased genes and sex-biased gene expression. *Nat*  
707 *Rev Genet* 8: 689–698.
- 708 Filteau, M., S. A. Pavey, J. St-Cyr, and L. Bernatchez, 2013 Gene coexpression networks reveal key  
709 drivers of phenotypic divergence in Lake Whitefish. *Molecular Biology and Evolution* 30: 1384–  
710 1396.
- 711 Fleming, I. A., 1998 Pattern and variability in the breeding system of Atlantic salmon (*Salmo salar*), with  
712 comparisons to other salmonids. *Can. J. Fish. Aquat. Sci.* 55: 59–76.
- 713 Gaiteri, C., Y. Ding, B. French, G. C. Tseng, and E. Sibille, 2014 Beyond modules and hubs: the potential  
714 of gene coexpression networks for investigating molecular mechanisms of complex brain disorders.  
715 *Genes Brain Behav.* 13: 13–24.
- 716 Garcia-Reyero, N., B. S. Jayasinghe, K. J. Kroll, T. Sabo-Attwood, and N. D. Denslow, 2018 Estrogen  
717 signaling through both membrane and nuclear receptors in the liver of Fathead Minnow. *General and*  
718 *Comparative Endocrinology* 257: 50–66.
- 719 Gillis, J., and P. Pavlidis, 2012 “Guilt by association” is the exception rather than the rule in gene  
720 networks. *PLoS Comput Biol* 8: e1002444.
- 721 Horreo, J. L., 2017 Revisiting the mitogenomic phylogeny of Salmoninae: new insights thanks to recent  
722 sequencing advances. *PeerJ* 5: e3828–10.
- 723 Huang, D. W., B. T. Sherman, and R. A. Lempicki, 2009 Systematic and integrative analysis of large  
724 gene lists using DAVID bioinformatics resources. *Nat Protoc* 4: 44–57.
- 725 Kodama, M., M. S. O. Briec, R. H. Devlin, J. J. Hard, and K. A. Naish, 2014 Comparative mapping  
726 between Coho Salmon (*Oncorhynchus kisutch*) and three other salmonids suggests a role for  
727 chromosomal rearrangements in the retention of duplicated regions following a whole genome  
728 duplication event. *G3 - Genes|Genomes|Genetics* 4: 1717–1730.
- 729 Langfelder, P., and S. Horvath, 2012 Fast R functions for robust correlations and hierarchical clustering.  
730 *J. Stat. Soft.* 46: 1–17.
- 731 Langfelder, P., and S. Horvath, 2008 WGCNA: an R package for weighted correlation network analysis.  
732 *BMC Bioinformatics* 9: 559.
- 733 Langfelder, P., R. Luo, M. C. Oldham, and S. Horvath, 2011 Is my network module preserved and  
734 reproducible? *PLoS Comput Biol* 7: e1001057.
- 735 Langmead, B., and S. L. Salzberg, 2012 Fast gapped-read alignment with Bowtie 2. *Nat Meth* 9: 357–  
736 359.
- 737 Li, H., B. Handsaker, A. Wysoker, T. Fennell, J. Ruan *et al.*, 2009 The Sequence Alignment/Map format  
738 and SAMtools. *Bioinformatics* 25: 2078–2079.
- 739 Lien, S., B. F. Koop, S. R. Sandve, J. R. Miller, M. P. Kent *et al.*, 2016 The Atlantic Salmon genome  
740 provides insights into rediploidization. *Nature* 533: 200–205.

- 741 Lochmiller, R. L., and C. Deerenberg, 2000 Trade-offs in evolutionary immunology: just what is the cost  
742 of immunity? *Oikos* 88: 87–98.
- 743 Mackay T. F., 2001 The genetic architecture of quantitative traits. *Annu. Rev. Genet.* 35: 303–339.
- 744 Mackay T. F. C., Stone E. A., Ayroles J. F., 2009 The genetics of quantitative traits: challenges and  
745 prospects. *Nat Rev Genet* 10: 565–577.
- 746 MacManes, M. D., 2014 On the optimal trimming of high-throughput mRNA sequence data. *Front.*  
747 *Genet.* 5: 13.
- 748 Macqueen, D. J., and I. A. Johnston, 2014 A well-constrained estimate for the timing of the salmonid  
749 whole genome duplication reveals major decoupling from species diversification. *Proceedings of the*  
750 *Royal Society B: Biological Sciences* 281: 20132881–20132881.
- 751 Mähler, N., J. Wang, B. K. Terebieniec, P. K. Ingvarsson, N. R. Street *et al.*, 2017 Gene co-expression  
752 network connectivity is an important determinant of selective constraint. *PLoS Genet* 13: e1006402.
- 753 Miller, K. M., I. A. Gardner, R. Vanderstichel, T. Burnley, S. Li *et al.*, 2016 Report on the performance  
754 evaluation of the Fluidigm BioMark platform for high-throughput microbe monitoring in salmon., 1–  
755 293 p.
- 756 Mueller, A. J., E. G. Canty-Laird, P. D. Clegg, and S. R. Tew, 2017 Cross-species gene modules emerge  
757 from a systems biology approach to osteoarthritis. *NPJ Syst Biol Appl* 3: 13.
- 758 Nicol, B., and Y. Guiguen, 2011 Expression profiling of wnt signaling genes during gonadal  
759 differentiation and gametogenesis in Rainbow Trout. *Sex Dev* 5: 318–329.
- 760 Oldham, M. C., S. Horvath, and D. H. Geschwind, 2006 Conservation and evolution of gene coexpression  
761 networks in human and chimpanzee brains. *Proceedings of the National Academy of Sciences* 103:  
762 17973–17978.
- 763 Parsch, J., and H. Ellegren, 2013 The evolutionary causes and consequences of sex-biased gene  
764 expression. *Nature Publishing Group* 14: 83–87.
- 765 Pasquier, J., C. Cabau, T. Nguyen, E. Jouanno, D. Severac *et al.*, 2016 Gene evolution and gene  
766 expression after whole genome duplication in fish: the PhyloFish database. *BMC Genomics* 17: 368.
- 767 Poley, J. D., B. J. G. Sutherland, S. R. M. Jones, B. F. Koop, and M. D. Fast, 2016 Sex-biased gene  
768 expression and sequence conservation in Atlantic and Pacific salmon lice (*Lepeophtheirus salmonis*).  
769 *BMC Genomics* 17: 483.
- 770 Prokkola, J. M., M. Nikinmaa, M. Lewis, K. Anttila, M. Kanerva *et al.*, 2018 Cold temperature represses  
771 daily rhythms in the liver transcriptome of a stenothermal teleost under decreasing day length. *J. Exp.*  
772 *Biol.* 221: jeb170670.
- 773 Qiao, Q., S. Le Manach, B. Sotton, H. Huet, E. Duvernois-Berthet *et al.*, 2016 Deep sexual dimorphism in  
774 adult medaka fish liver highlighted by multi-omic approach. *Sci. Rep.* 6: 32459.
- 775 Quinlan, A. R., and I. M. Hall, 2010 BEDTools: a flexible suite of utilities for comparing genomic  
776 features. *Bioinformatics* 26: 841–842.



- 777 Quinn, T. P., and C. J. Foote, 1994 The effects of body size and sexual dimorphism on the reproductive  
778 behavior of sockeye salmon, *Oncorhynchus nerka*. *Animal Behaviour* 48: 751–761.
- 779 R Core Team, 2018 R: A language and environment for statistical computing. R Foundation for Statistical  
780 Computing.
- 781 Roberts, A., and L. Pachter, 2013 Streaming fragment assignment for real-time analysis of sequencing  
782 experiments. *Nat Meth* 10: 71–73.
- 783 Robertson, F. M., M. K. Gundappa, F. Grammes, T. R. Hvidsten, A. K. Redmond *et al.*, 2017 Lineage-  
784 specific rediploidization is a mechanism to explain time-lags between genome duplication and  
785 evolutionary diversification. *Genome Biol.* 18: 111.
- 786 Robinson, M. D., and A. Oshlack, 2010 A scaling normalization method for differential expression  
787 analysis of RNA-seq data. *Genome Biol.* 11: R25.
- 788 Robinson, M. D., D. J. McCarthy, and G. K. Smyth, 2010 edgeR: a Bioconductor package for differential  
789 expression analysis of digital gene expression data. *Bioinformatics* 26: 139–140.
- 790 Rose, N. H., F. O. Seneca, and S. R. Palumbi, 2015 Gene networks in the wild: identifying transcriptional  
791 modules that mediate coral resistance to experimental heat stress. *Genome Biology and Evolution* 8:  
792 243–252.
- 793 Rowe, L., S. F. Chenoweth, and A. F. Agrawal, 2018 The Genomics of Sexual Conflict. *The American*  
794 *Naturalist* 192: 274–286.
- 795 Sauvage, C., M. Vagner, N. Derôme, C. Audet, and L. Bernatchez, 2012a Coding gene single nucleotide  
796 polymorphism mapping and quantitative trait loci detection for physiological reproductive traits in  
797 Brook Charr, *Salvelinus fontinalis*. *G3 - Genes|Genomes|Genetics* 2: 379–392.
- 798 Sauvage, C., M. Vagner, N. Derôme, C. Audet, and L. Bernatchez, 2012b Coding gene SNP mapping  
799 reveals QTL linked to growth and stress response in Brook Charr (*Salvelinus fontinalis*). *G3 -*  
800 *Genes|Genomes|Genetics* 2: 707–720.
- 801 Sreenivasan, R., J. Jiang, X. Wang, R. Bártfai, H. Y. Kwan *et al.*, 2014 Gonad differentiation in Zebrafish  
802 is regulated by the canonical wnt signaling pathway. *Biology of Reproduction* 90: e34397–10.
- 803 Sutherland, B. J. G., T. Gosselin, E. Normandeau, M. Lamothe, N. Isabel *et al.*, 2016 Salmonid  
804 chromosome evolution as revealed by a novel method for comparing RADseq linkage maps. *Genome*  
805 *Biology and Evolution* 8: 3600–3617.
- 806 Sutherland, B. J. G., K. C. Hanson, J. R. Jantzen, B. F. Koop, and C. T. Smith, 2014 Divergent immunity  
807 and energetic programs in the gills of migratory and resident *Oncorhynchus mykiss*. *Mol. Ecol.* 23:  
808 1952–1964.
- 809 Sutherland, B. J. G., K. W. Koczka, M. Yasuike, S. G. Jantzen, R. Yazawa *et al.*, 2014 Comparative  
810 transcriptomics of Atlantic *Salmo salar*, Chum *Oncorhynchus keta* and Pink Salmon *O. gorbuscha*  
811 during infections with salmon lice *Lepeophtheirus salmonis*. *BMC Genomics* 15: 200.
- 812 Sutherland, B. J. G., C. Rico, C. Audet, and L. Bernatchez, 2017 Sex chromosome evolution,  
813 heterochiasmy, and physiological QTL in the salmonid Brook Charr *Salvelinus fontinalis*. *G3 -*

- 814 Genes|Genomes|Genetics 7: 2749–2762.
- 815 Thompson, D., A. Regev, and S. Roy, 2015 Comparative analysis of gene regulatory networks: from  
816 network reconstruction to evolution. *Annu. Rev. Cell Dev. Biol.* 31: 399–428.
- 817 Tritchler, D., E. Parkhomenko, and J. Beyene, 2009 Filtering Genes for Cluster and Network Analysis.  
818 *BMC Bioinformatics* 10: 193–9.
- 819 Vainio, S., M. Heikkilä, A. Kispert, N. Chin, and A. P. McMahon, 1999 Female development in  
820 mammals is regulated by Wnt-4 signalling. *Nature* 397: 405–409.
- 821 van Dam, S., U. Vösa, A. van der Graaf, L. Franke, and J. P. de Magalhães, 2017 Gene co-expression  
822 analysis for functional classification and gene-disease predictions. *Brief Bioinform.*
- 823 van der Most, P. J., B. de Jong, H. K. Parmentier, and S. Verhulst, 2010 Trade-off between growth and  
824 immune function: a meta-analysis of selection experiments. *Functional Ecology* 25: 74–80.
- 825 van Nas, A., D. Guhathakurta, S. S. Wang, N. Yehya, S. Horvath *et al.*, 2009 Elucidating the role of  
826 gonadal hormones in sexually dimorphic gene coexpression networks. *Endocrinology* 150: 1235–  
827 1249.
- 828 Warnes, G. R., B. Bolker, L. Bonebakker, R. Gentleman, W. Hubert *et al.*, 2016 gplots: Various R  
829 Programming Tools for Plotting Data.
- 830 Wijchers, P. J., and R. J. Festenstein, 2011 Epigenetic regulation of autosomal gene expression by sex  
831 chromosomes. *Trends Genet.* 27: 132–140.
- 832 Wong, R. Y., M. M. McLeod, and J. Godwin, 2014 Limited sex-biased neural gene expression patterns  
833 across strains in Zebrafish (*Danio rerio*). *BMC Genomics* 15: 905–10.
- 834 Wright, A. E., M. Fumagalli, C. R. Cooney, N. I. Bloch, F. G. Vieira *et al.*, 2018 Male-biased gene  
835 expression resolves sexual conflict through the evolution of sex-specific genetic architecture.  
836 *Evolution Letters* 2: 52–61.
- 837 Wu, T. D., and C. K. Watanabe, 2005 GMAP: a genomic mapping and alignment program for mRNA and  
838 EST sequences. *Bioinformatics* 21: 1859–1875.
- 839

840 **TABLES AND FIGURES**

841 **Table 1.** Female modules shown with the number of transcripts within the module (n), the general  
 842 category of traits correlated with the module ( $p \leq 0.01$ ), the most significantly enriched Gene Ontology  
 843 category (Biological Process), the Zsummary for preservation of the module in Brook Charr males (BC  
 844 m) and Arctic Charr males (AC m), as well as the module quality (robustness). Zsummary < 2 is not  
 845 preserved,  $2 < \text{Zsummary} < 10$  is moderately preserved, and  $> 10$  is preserved. The *grey* module includes  
 846 unassigned genes and the *gold* module is a random selection of 1000 genes from the assigned modules for  
 847 testing preservation metrics. Full module-trait correlations are shown in Figure 2, full GO enrichment in  
 848 Additional File S1, and expanded summaries of this table in Additional File S2.  
 849

| Module                | n     | Traits                                    | GO Enrichment (BP)                                                 | Preservation<br>BC m   AC m |       | Quality |
|-----------------------|-------|-------------------------------------------|--------------------------------------------------------------------|-----------------------------|-------|---------|
| <i>green</i>          | 725   | blood                                     | translation                                                        | 100                         | 24    | 75      |
| <i>blue2</i>          | 1762  | blood; liver;<br>maturity; RIN            | ribonucleoprotein complex<br>biogenesis                            | 71                          | 32    | 58.5    |
| <i>salmon</i>         | 449   | liver;<br>maturity; RIN                   | erythrocyte development                                            | 56                          | 17    | 42      |
| <i>darkorange</i>     | 805   | blood                                     | small molecule metabolic<br>process                                | 48                          | 8.8   | 36      |
| <i>lightsteelblue</i> | 77    | blood                                     | <i>none</i>                                                        | 48                          | 8.2   | 25.5    |
| <i>ivory</i>          | 451   | -                                         | ER-associated ubiquitin-<br>dependent protein catabolic<br>process | 37                          | 5.4   | 25.5    |
| <i>thistle2</i>       | 834   | maturity                                  | tissue development                                                 | 29                          | 3.6   | 36.5    |
| <i>indianred4</i>     | 1180  | blood;<br>growth; liver;<br>maturity; RIN | membrane assembly                                                  | 28                          | 2.8   | 22      |
| <i>coral1</i>         | 689   | liver;<br>maturity; RIN                   | regulation of cell growth                                          | 25                          | 5.2   | 34      |
| <i>thistle3</i>       | 235   | blood; liver;<br>size                     | inorganic anion transmembrane<br>transport                         | 24                          | 1.2   | 21      |
| <i>skyblue1</i>       | 96    | RIN                                       | intracellular signal transduction                                  | 17                          | 1.2   | 21      |
| <i>darkmagenta</i>    | 1072  | blood;<br>maturity                        | single-organism metabolic<br>process                               | 13                          | 5     | 58      |
| <i>coral2</i>         | 200   | -                                         | regulation of blood circulation                                    | 11                          | 2.8   | 14      |
| <i>grey</i>           | 5892  | Not a module                              | Not a module                                                       | 9                           | 2.4   | -18     |
| <i>gold</i>           | 1k*   | blood; size                               | Not a module                                                       | 4.8                         | 0.38  | -0.86   |
| <i>darkred</i>        | 10533 | blood                                     | protein ubiquitination                                             | 4.5                         | -0.55 | 23.5    |

850

851

852 **Table 2.** Male modules with the number of transcripts within the module (n), the general category of  
 853 traits correlated with the module ( $p \leq 0.01$ ), the most significantly enriched Gene Ontology category  
 854 (Biol. Proc.), the Zsummary for preservation of the module in Brook Charr females (BC f) and Arctic  
 855 Charr males (AC m), as well as the identified module quality (robustness). Zsummary < 2 is not  
 856 preserved,  $2 < \text{Zsummary} < 10$  is moderately preserved, and  $> 10$  is preserved. The *grey* module includes  
 857 unassigned genes and the *gold* module is a random selection of 1000 genes from the assigned modules for  
 858 testing preservation metrics. Full module-trait correlations are shown in Figure S9, full GO enrichment in  
 859 Additional File 1, and expanded summaries of this table in Additional File S2.

| Module                 | n     | Traits                           | GO Enrichment (BP)                               | Preservation<br>BC f   AC m | Quality |
|------------------------|-------|----------------------------------|--------------------------------------------------|-----------------------------|---------|
| <i>yellow</i>          | 339   | blood; liver;<br>size            | translation                                      | 58   24                     | 51      |
| <i>tan</i>             | 173   | blood; size                      | <i>none</i>                                      | 43   18                     | 41.5    |
| <i>brown</i>           | 1732  | blood; sperm                     | ribonucleoprotein complex<br>biogenesis          | 38   39                     | 72.5    |
| <i>lightcyan</i>       | 734   | blood; size                      | organic acid metabolic process                   | 34   21                     | 69      |
| <i>magenta</i>         | 226   | <i>none</i>                      | response to endoplasmic<br>reticulum stress      | 32   38                     | 45      |
| <i>darkmagenta</i>     | 61    | <i>none</i>                      | defense response to virus                        | 27   16                     | 25.5    |
| <i>darkgreen</i>       | 724   | blood;<br>growth; liver;<br>size | <i>none</i>                                      | 24   11                     | 58      |
| <i>steelblue</i>       | 65    | blood;<br>growth;<br>sperm       | positive regulation of innate<br>immune response | 22   6.2                    | 26.5    |
| <i>violet</i>          | 64    | liver                            | sterol biosynthetic process                      | 21   10                     | 29.5    |
| <i>grey60</i>          | 147   | <i>none</i>                      | secretion by cell                                | 20   11                     | 39      |
| <i>lightsteelblue1</i> | 55    | <i>none</i>                      | <i>none</i>                                      | 15   0.85                   | 23      |
| <i>yellowgreen</i>     | 61    | blood                            | <i>none</i>                                      | 13   0.24                   | 24.5    |
| <i>turquoise</i>       | 783   | <i>none</i>                      | immune system process                            | 12   14                     | 68.5    |
| <i>orangered4</i>      | 57    | sperm                            | regulation of apoptotic process                  | 12   2.3                    | 26.5    |
| <i>floralwhite</i>     | 52    | <i>none</i>                      | glutathione metabolic process                    | 11   13                     | 25      |
| <i>paleturquoise</i>   | 64    | blood                            | response to organonitrogen<br>compound           | 10   7.8                    | 25.5    |
| <i>lightcyan1</i>      | 791   | blood; sperm                     | cytokinesis                                      | 9.7   11                    | 67.5    |
| <i>sienna3</i>         | 61    | liver; size                      | extracellular structure<br>organization          | 9.6   14                    | 26.5    |
| <i>plum1</i>           | 58    | <i>none</i>                      | <i>none</i>                                      | 9.6   7.4                   | 23.5    |
| <i>mediumpurple3</i>   | 57    | size                             | ribonucleoprotein complex<br>assembly            | 8.4   5.3                   | 20.5    |
| <i>darkolivegreen</i>  | 138   | blood                            | <i>none</i>                                      | 7.6   11                    | 28.5    |
| <i>skyblue</i>         | 78    | RIN                              | regulation of transcription,<br>DNA-templated    | 6.7   5.8                   | 28      |
| <i>grey</i>            | 17992 | <i>Not a module</i>              | <i>Not a module</i>                              | 5.5   2.3                   | -14     |
| <i>gold</i>            | 1k*   | <i>Not a module</i>              | <i>Not a module</i>                              | 4.9   3.2                   | -0.035  |
| <i>green</i>           | 334   | size                             | translation                                      | 4.5   3.1                   | 39      |
| <i>darkgrey</i>        | 100   | size                             | small molecule metabolic<br>process              | 1.8   -0.28                 | 31.5    |
| <i>ivory</i>           | 54    | blood                            | neurogenesis                                     | 0.81   0.22                 | 24      |

860

861 **Table 3.** Sex-biased transcript presence in modules that are either unique to each sex (low module  
 862 preservation), or moderately or highly preserved, along with the number and percentage of the transcripts  
 863 within each sex's sex-biased transcript category (e.g. female high sex-bias). These counts only include  
 864 expressed transcripts that are assigned to modules in the network analysis for each sex.  
 865

| Sex           | Module Preservation in opposite sex | All expressed transcripts count | Moderate sex bias (1.5-4-fold) | High sex bias (>4-fold) |
|---------------|-------------------------------------|---------------------------------|--------------------------------|-------------------------|
| <b>Female</b> | Low                                 | 0 (0%)                          | 0 (0%)                         | 0 (0%)                  |
|               | Medium                              | 9,613 (54.8%)                   | 744 (52.0%)                    | 31 (53.4%)              |
|               | High                                | 7,929 (45.2%)                   | 687 (48.0%)                    | 27 (46.6%)              |
| <b>Total</b>  | -                                   | 17,542                          | 1,431                          | 58                      |
| <b>Male</b>   | Low                                 | 147 (2.3%)                      | 19 (2.6%)                      | 0 (0%)                  |
|               | Medium                              | 1,350 (21.1%)                   | 119 (16.5%)                    | 1 (2.7%)                |
|               | High                                | 4,886 (76.5%)                   | 584 (80.9%)                    | 36 (97.3%)              |
| <b>Total</b>  |                                     | 6,383                           | 722                            | 37                      |

866

867

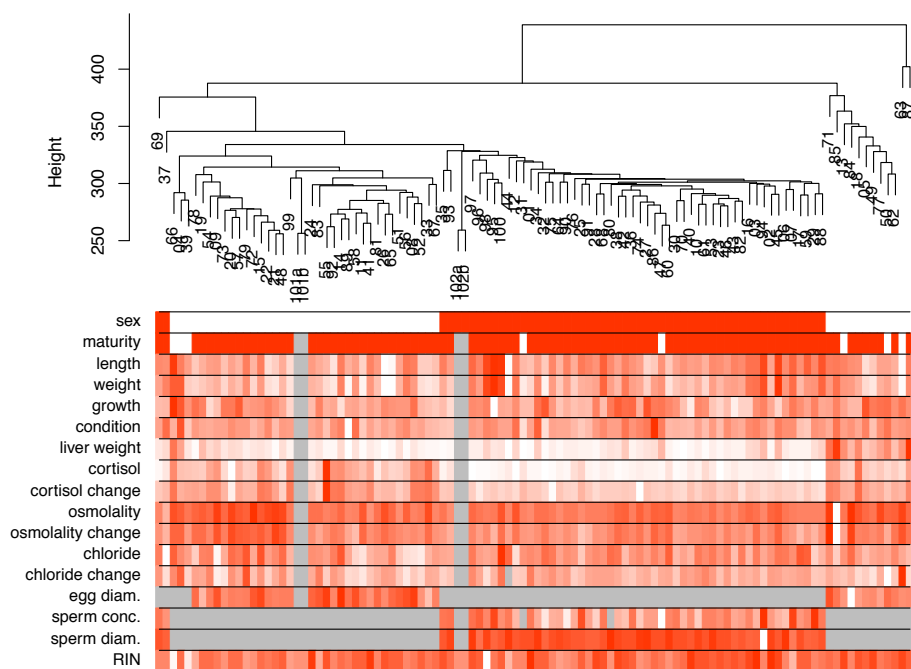

868

869 **Figure 1.** Brook Charr individual samples clustered by gene expression similarity in the liver using all  
 870 genes with corresponding quantitative trait values shown in the heatmap below the dendrogram with  
 871 intensity of red reflecting the normalized trait value for that sample. Sex was the largest factor affecting  
 872 the data (see heatmap sex row; white = females; red = males). Parents were sequenced in duplicate, and  
 873 clustered with the offspring of their respective sex (see 101ab for mother and 102ab for father; parents  
 874 have grey missing data values for all phenotypes but sex and RIN). Females with large liver weight  
 875 clustered outside the other female samples (see on the right-hand side on the liver weight row), and were  
 876 removed as they were considered outliers (see Methods).

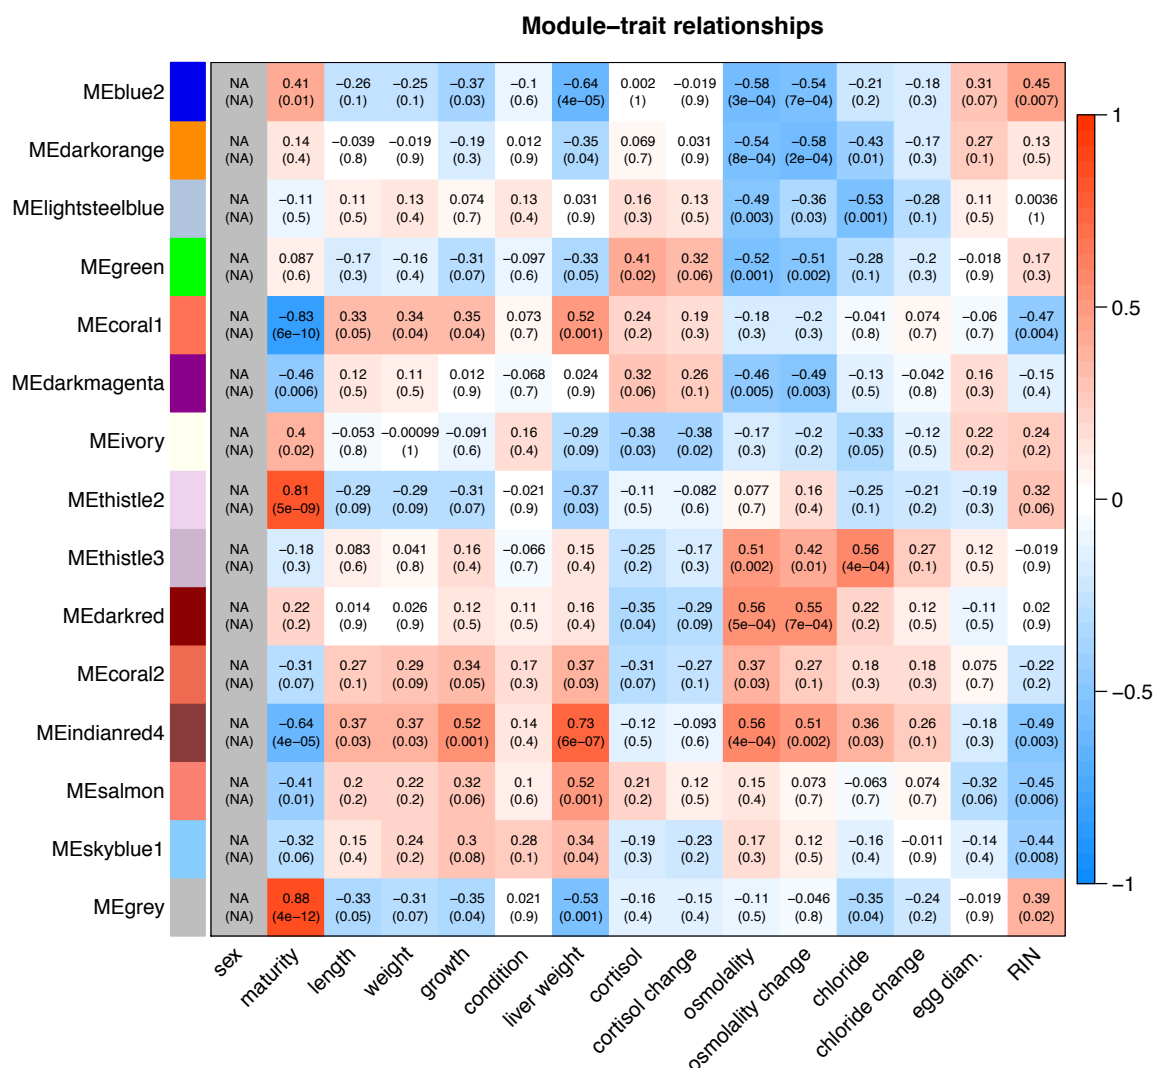

877

878 **Figure 2.** Module-trait relationships for Brook Charr females, estimated with Pearson correlation r-values  
 879 and p-values. The boldness of color indicates the strength of the relationship. Module-trait correlations are  
 880 also shown in Table 1 with more general grouping of traits alongside other metrics such as module size  
 881 and enriched Gene Ontology categories. The male network module-trait relationships are shown in Figure  
 882 S9.  
 883

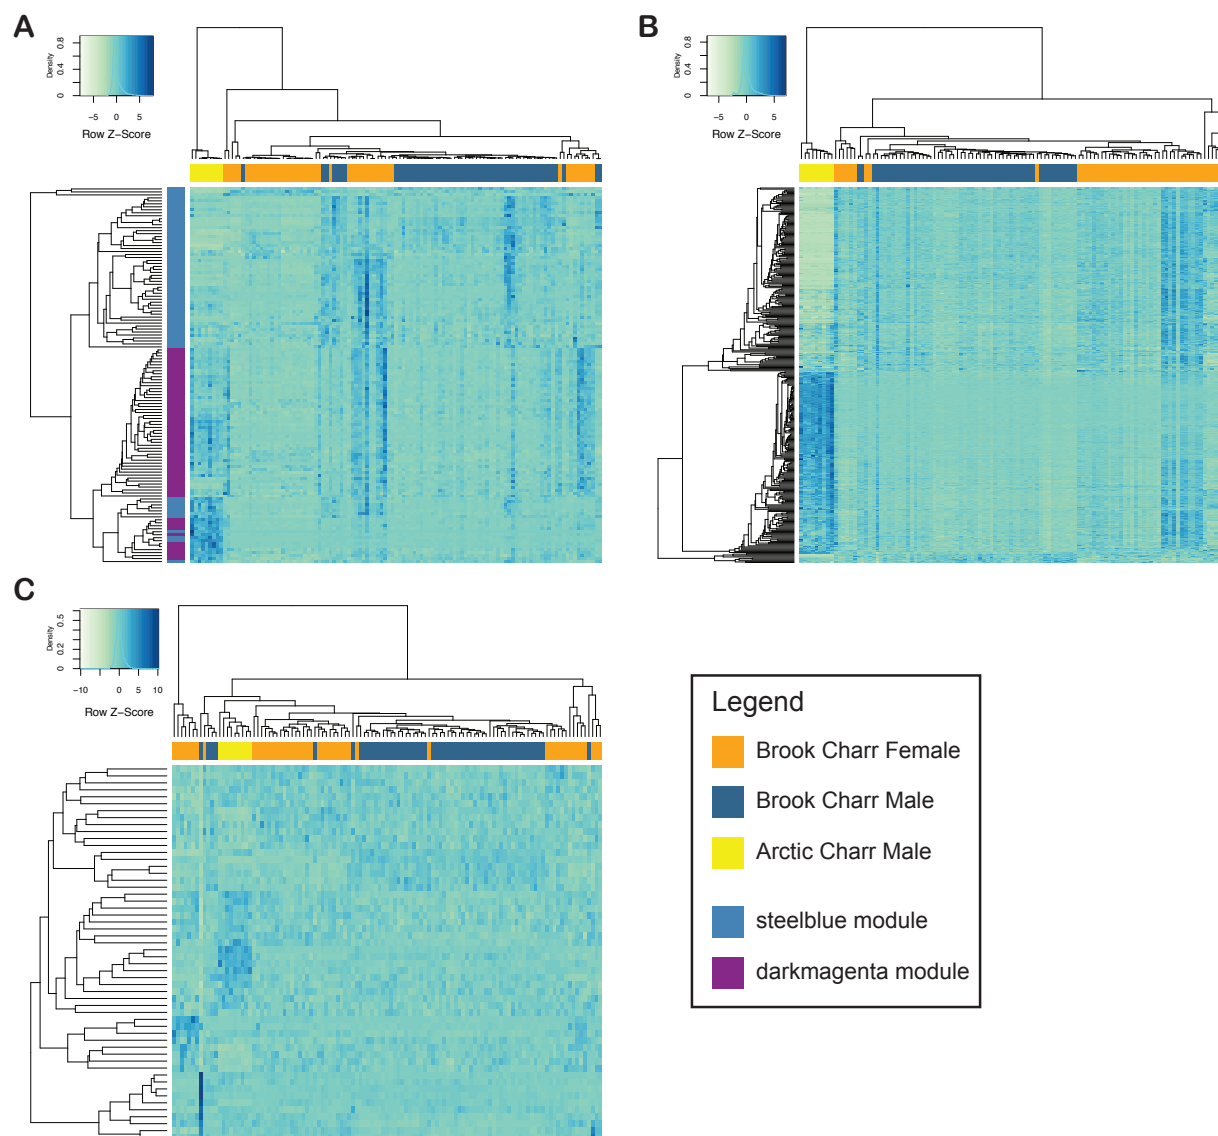

884

885 **Figure 3.** Heatmaps of normalized transcript expression values, clustering both samples and transcripts  
886 using Pearson correlation within (A) two immunity-related male modules, *steelblue* and *darkmagenta*,  
887 which are related to innate immunity and innate antiviral immunity, respectively, (B) the preserved male  
888 module *yellow* (translation), and (C) the male-specific *ivory* (transcription factor activity). Samples are  
889 shown on the horizontal with colors corresponding to the three categories of samples in the legend. The  
890 two modules shown in (A) are colored on the vertical based on the cluster in which the transcript is  
891 contained, as shown in the legend.
