# Supplementary material for: Sex-specific co-expression networks and sex-biased gene expression in the salmonid Brook Charr Salvelinus fontinalis
Source: bioRxiv preprint, doi:10.1101/305680, version 3 (2019-01-15)
Supplement: Additional File S5 [file 305680_file06.csv]

	transcript_id	uniprot_id	moduleColor	GS.weight.g_0709	GS.sp.growth.rateT1.T3	GS.condit.fact_T2	GS.hep.som.ind	GS.cort.delta	GS.osmo.delta	GS.chlor.delta	GS.male.sperm.conc	GS.male.sperm.diam	p.GS.weight.g_0709	p.GS.sp.growth.rateT1.T3	p.GS.condit.fact_T2	p.GS.hep.som.ind	p.GS.cort.delta	p.GS.osmo.delta	p.GS.chlor.delta	p.GS.male.sperm.conc	p.GS.male.sperm.diam	MMyellow	MMivory	MMdarkolivegreen	MMlightcyan1	MMskyblue	MMviolet	MMdarkgreen	MMsienna3	MMturquoise	MMmagenta	MMbrown	MMmediumpurple3	MMgreen	MMlightsteelblue1	MMfloralwhite	MMdarkmagenta	MMsteelblue	MMorangered4	MMpaleturquoise	MMgrey60	MMtan	MMyellowgreen	MMdarkgrey	MMlightcyan	MMplum1	MMgrey	p.MMyellow	p.MMivory
QSF_005R.1.1	QSF_005R.1.1	VG87_GAHVM	grey	0.154625554421133	-0.0399648331856815	-0.0862332954829014	0.12733931742995	-0.0792312370955288	-0.224625336957914	-0.296525487780312	0.146511694460965	-0.12817722983976	0.273729415526256	0.778482413099115	0.543283727015702	0.368330622283548	0.576615843061804	0.109387059932929	0.0327969031318571	0.299999711792455	0.36516162880608	-0.29452770924108	-0.235860392711173	-0.290426462792341	-0.408063341855575	0.00850016950903177	-0.257169410153053	-0.132342340867814	0.310219922092407	0.168194153167522	0.380052345034344	0.0257772691643455	-0.25891172887016	0.0147398471281173	-0.0696548228833064	0.301338812929974	0.162472388185322	0.287439205875888	0.134369458179726	-0.00504247668520898	0.159705986751108	0.142612652061309	0.347820595555598	0.405482163917742	0.259833240934704	0.293109455118031	-0.400852366132074	0.0340479581864418	0.0923151895370659
QSF_110KD.1.1	QSF_110KD.1.1	PBMU2_HUMAN	grey	0.146764607701113	0.0339414213017904	-0.0132576101901426	0.122134602988386	-0.144214658687906	0.077306789313611	0.0642070629963802	0.219621301027737	-0.12505846494574	0.299157044850387	0.811203215897011	0.925679499597232	0.388384274270238	0.307723263962158	0.585937842089109	0.651113622562016	0.117728186161355	0.377040543881532	-0.135972689692907	0.196964788070201	-0.0296708992827614	0.186073243919941	-0.0377276957715435	0.0538533991782977	0.259503084704196	0.242686188635725	0.33318152023545	0.0815378438504968	-0.0813826972814462	0.130631409783432	0.0130645204519132	-0.268574571573424	0.237968009739682	0.114844267324594	-0.114320266923775	0.111879272868847	0.109985045969906	-0.214260025312947	-0.0172246419670655	0.093240348114373	-0.0729596147028337	-0.220250022101195	0.00564396828475771	0.149914466702681	0.33647607181238	0.161645292998617
QSF_1433B.1.1	QSF_1433B.1.1	1433Z_CHICK	brown	0.291715336840654	-0.181677287315798	0.13093404036703	-0.125392011865648	-0.20709677215336	-0.250317679957047	0.104473258561542	0.313603082820399	-0.208320645429061	0.0358759317613245	0.197396578962981	0.354852388024888	0.375759194196898	0.140719656223918	0.0734859197075793	0.461077145043887	0.0235806380195858	0.138335572110606	-0.0743171758058231	-0.217366852159938	-0.433000721004826	-0.347512132869127	-0.0509242164151018	0.0192594390587898	-0.0935127612452866	0.0261821868552863	0.079219873060307	0.33862720192075	0.525030308228095	0.280131018538513	0.301613721912941	0.136651784905654	0.0101902232471374	-0.038681507806875	0.119844335748153	0.113480974692705	0.0285977066624123	0.0807063106350536	-0.168307863747979	-0.192710358957726	0.102603493601336	-0.0462588324542014	-0.262446574555738	-0.403398128160894	0.600552346922735	0.121640528903674
QSF_1433F.1.1	QSF_1433F.1.1	1433F_HUMAN	darkgreen	0.0149360989030752	0.0815869913186591	-0.00555780433537733	0.43586869606568	0.14943343475837	0.217222756688146	-0.345291918157013	-0.222249927159318	-0.0922074948421333	0.916301758370892	0.565297838784049	0.968807536273066	0.00123854447242223	0.290358365287408	0.121893901554364	0.0121746636043547	0.113288238328907	0.515600850862928	-0.0345121298212891	0.150818630716403	0.167266241780307	0.548911621827276	-0.0631760921619717	0.0503029114214665	0.64413736822486	0.215747593876372	-0.00582867183625402	-0.0352715444759707	-0.413401388920263	0.181233144983943	-0.214705592699275	0.02144567006072	0.0171325182952127	-0.262684721189021	-0.244740550935649	-0.223246994276398	-0.116509126380597	-0.0185282196942139	0.116848234100543	-0.234088095253869	-0.198960501725769	-0.51047822386721	-0.0409605187584153	0.524388584308462	0.808088271257518	0.285858866927369
QSF_143B2.1.3	QSF_143B2.1.3	143B2_ONCMY	grey	0.119659261208897	-0.312847209175329	-0.255398443661917	-0.257300365224112	0.226887969785092	-0.424075020388426	-0.277447303003336	0.301292172399955	-0.2284713238899	0.398143573182678	0.0239365896212168	0.0676440251471462	0.0655549277155751	0.105767660626314	0.00173021055010896	0.0464424022586495	0.0299653658881008	0.103290146547099	0.227407642388147	-0.162972221783552	-0.0285156652784008	-0.311243611634775	0.0729962240502529	0.0325440196657483	-0.379470834315218	-0.271316252917808	-0.365562467669203	-0.0425493229651091	0.189740944879871	-0.206634324768226	0.0271393683670423	-0.0276782186314493	0.0173813332320886	-0.0224904134199352	0.33364767388569	0.184882941628126	0.286633840758093	0.040607026718327	-0.28226560953631	0.11567531838518	-0.209263442169321	0.407918524411591	0.0779739538505023	-0.294954552963439	0.104949528222027	0.248344926917855
QSF_143B2.3.3	QSF_143B2.3.3	1433B_MOUSE	grey	0.0623004386109644	-0.197171652365675	-0.0464140759855437	-0.314337662247558	0.00933496563054517	-0.309399255767693	-0.241992811382167	0.171096730666159	0.0053985175165183	0.660835039391587	0.161196464444507	0.743867059256696	0.0232389912904443	0.94763226685717	0.0256181066997824	0.0839152096612256	0.225217525695689	0.969701090162198	0.337010144924045	-0.0315573668622363	0.0315193172495861	-0.263265361939805	-0.108551650388678	0.0141521468399331	-0.352549871366905	-0.0657006594120917	-0.260561710133356	-0.208487923940967	0.204280839449997	-0.12425123489136	0.228842728296343	0.057351576738552	0.194143916629982	0.0364181921605613	0.248500780962672	0.181757975470543	0.0348019989823506	-0.106048201966866	-0.282238259697464	0.20076540531245	-0.339011674527075	0.450968808443338	0.266985341571991	-0.301968729564414	0.0145627135653298	0.824246298036483
QSF_143G1.3.4	QSF_143G1.3.4	.	grey	0.20117540707206	-0.170034229262703	0.226236394815966	0.293213174250201	-0.00716489924168675	0.227481025313697	-0.108239292972113	-0.0486586753590431	0.0544275202165737	0.152688510596682	0.228154169561225	0.10680036989187	0.0348925284278466	0.959794497806544	0.104834393354273	0.44498707103181	0.731932430515471	0.701552313184807	-0.011019056519614	0.0678107596494161	-0.0244788144731877	0.271622499936254	-0.0335279620259375	-0.124988442367888	0.375246594476367	0.127836043139643	-0.0556761716267968	0.115901340990694	0.0308559418719901	0.343740122719366	0.136614490706903	0.424630877449656	-0.060544178186955	-0.0556219964896987	-0.0379092366228075	-0.0951169331890873	-0.183681596779113	-0.121706141920124	0.0062291969468139	-0.426149796802111	-0.26150349991151	-0.430155201776392	-0.291961502575754	0.238857754767681	0.938201712534327	0.632896551992113
QSF_143G1.4.4	QSF_143G1.4.4	143G1_ONCMY	grey	-0.101076660416905	-0.148074311429997	-0.0168711483393637	0.161033822455741	0.168037772943924	0.182147798265339	0.0957318117102875	-0.019851879186692	-0.0150715459621406	0.47585500388023	0.294817842731866	0.90550468643108	0.254092583738659	0.233743465047784	0.196218795636906	0.499609884180008	0.888906745356263	0.915545488758932	0.123774386292576	0.218737231488155	0.0216252391078028	0.340324790586273	0.0901058896295828	0.153262321460282	0.297048143942119	-0.154031601392126	0.0532959765712436	0.0229342684605146	0.0595099210935041	0.411568747655199	-0.234752644101113	-0.028053380473541	-0.139063049643226	0.0248360627544851	-0.191508216399283	-0.141780431619392	-0.207072371564436	-0.0235410165729799	0.0865196351663552	-0.202634382317931	-0.0235920623264147	-0.498102632179191	-0.528266530032394	0.320717799101591	0.381997782760311	0.119250817738994
QSF_143G2.2.9	QSF_143G2.2.9	143G2_ONCMY	grey	0.15027550696737	-0.188030314157192	0.0597781884877204	-0.253712809714558	0.0527432040637032	-0.484562695329157	-0.113257584020381	0.335128645789874	-0.263099319935455	0.287617606671094	0.181913270284851	0.67378088814845	0.0695396251603158	0.710377084339056	0.000272461430696365	0.424037823227578	0.0151578485744306	0.0595019518536512	-0.151194021073711	-0.321430294134098	-0.223522577236568	-0.604957311611957	-0.00337475282461009	-0.0344647263192793	-0.525706620145507	-0.0953232777783021	-0.248736845373496	-0.0100426721964958	0.295911364427438	-0.258761140983716	0.0775514590509067	0.10003823877286	0.0705290703171886	0.0420275719167085	0.450015295342395	0.465528031891566	0.518043862265573	0.230004327938787	0.0298428436498825	0.258306209375672	0.147502681321205	0.542478890590808	0.138428178909113	-0.549687925213007	0.284647407669123	0.0201493068766386
QSF_143G2.3.9	QSF_143G2.3.9	.	grey	0.0833666806903731	-0.277069999353849	-0.0363846644291328	-0.137568262658723	-0.0583704517440089	-0.0408487027075916	-0.104668792190936	-0.159784926906995	-0.116329866467768	0.556816749773917	0.0467530207006811	0.797888863151779	0.330782984600393	0.68104756675834	0.77371141169929	0.460234062408199	0.257842931824952	0.411493487910095	0.111865080759299	-0.117314052721187	0.169967182136953	0.0778827715643103	0.202501718315955	0.198236782516683	-0.13023213477121	-0.217341745101335	-0.308805270458511	-0.133094420625768	-0.160010661864339	-0.210032482798008	-0.212603469615278	0.215468265777539	-0.150344443329805	0.12687323832706	0.0336167786390721	-0.240685549321605	-0.104895095063583	-0.00144541634696078	-0.0309012528115368	-0.102868869167714	0.173914781473761	0.14461056547069	0.0341697873212015	0.133362882007776	0.429794140068306	0.407520624042666
QSF_143G2.9.9	QSF_143G2.9.9	143G2_ONCMY	grey	0.0381589636638753	-0.0497604617053216	-0.00462317270965942	-0.293921629617523	-0.0849015105620309	-0.421869983839175	-0.00867156518012772	0.301936087742204	-0.162342095560306	0.788255268478394	0.726096914517916	0.974051061397788	0.0344352266572409	0.549551173549941	0.00183939187320709	0.951349195311782	0.0295989715948942	0.250203591143358	-0.149121118389401	-0.365429763497047	-0.240654643740899	-0.621356033571548	-0.158123569810077	-0.160609834254373	-0.510874744526653	-0.0384703604381868	-0.156835726014705	0.0899776178920787	0.301670475221521	-0.235048557102741	0.0970867704308487	-0.00740206602643682	0.00390017312795548	0.0675090210630331	0.396240339494965	0.445851949666972	0.551631290596335	0.151152551704868	0.146053677031815	0.312024297986653	0.0612601317599958	0.52615737287012	0.227123092291247	-0.573174040063461	0.291379203608401	0.0077236677788159
QSF_1A1L1.1.1	QSF_1A1L1.1.1	1A1L1_TAKRU	grey	-0.0590011648285972	-0.0674069309119765	-0.12752953907128	-0.0303949868197335	-0.123184637959345	0.0759710379388678	0.186425843820662	-0.0298860623022474	-0.0133839956574885	0.677788254038937	0.634927497360387	0.367609749820219	0.830622980306649	0.384287457856848	0.592447791393698	0.185738481393879	0.833418314530383	0.924973017455809	0.124053449770526	0.479755235710244	0.379098759346833	0.433677481300131	0.267265871287203	0.286097460563922	0.090862474413292	-0.194505323199753	-0.147411978995315	0.0894064682949505	-0.239726239284629	-0.121794395364804	-0.484944794652063	-0.237892285964932	-0.067508493520552	0.163840177191091	-0.154289751263051	-0.183223286046887	0.0212865385455365	-0.0626128754974483	0.0117368435503858	-0.00415000162048467	-0.0333259398027254	-0.103486836644971	-0.0292807638958409	0.417940419927998	0.380917163644868	0.000319634863728947
QSF_209L2.1.2	QSF_209L2.1.2	CLC4E_RAT	turquoise	0.103483032786319	0.117878813659431	0.167101896177779	0.306117444338976	-0.221323454632307	-0.0103057013594332	-0.22552876580595	-0.00217694028290115	0.0468362973109514	0.465359527201206	0.405250902525962	0.236395680956614	0.0273095296431285	0.114838283721404	0.942195400004432	0.107930678875881	0.987779646000644	0.741617433343623	-0.276648854550567	-0.348731591844197	-0.572711104420393	-0.42288845008387	-0.386144316438161	-0.344233496381959	0.155812661684062	0.497076978227508	0.63815047559452	0.34008473521163	0.237420553760409	0.201102618226757	0.0677590880879796	-0.0278650022169908	0.289374591146878	0.314323882106134	0.187128473792287	0.0382920198399146	-0.101128059418839	-0.111946661005699	0.314133249982494	-0.0357025462320783	0.25219294145325	-0.172281613152521	-0.0452718675964477	-0.462467170968776	0.0471017313755082	0.0112865370733121
QSF_2A5A.1.1	QSF_2A5A.1.1	2A5A_MOUSE	grey	0.0845084532563952	0.0567198201315894	0.122789409822712	0.0521527417496695	-0.0474482974587845	0.217351082082805	0.126552942141057	0.00896558555469332	-0.153156960420126	0.551407503273811	0.689604718193379	0.385826461763835	0.713479746427653	0.738360453983695	0.121668239004176	0.371319748258967	0.94970171405419	0.278367528014401	-0.107113264989874	0.305144821789279	0.194310721121596	0.300993266197017	0.114123168343261	0.355576057973412	0.123537771173785	-0.0857082395391645	-0.224726433783289	-0.0592907881542494	-0.138005720142074	-0.0703796654805721	-0.124246023034261	-0.019325545852856	-0.130167791798847	-0.0338337398013378	-0.320115108294701	-0.166026146473695	-0.00211751049297373	-0.144139301754909	0.0996403716696134	-0.165988875906093	-0.169452824929708	-0.108649115566319	0.00408088849186804	0.304950355413	0.449765107392324	0.0278284003647433
QSF_2ABG.1.2	QSF_2ABG.1.2	2ABG_HUMAN	grey	0.0700562340683805	0.178163918278122	-0.0728635828029027	0.15828644518169	-0.0432320734456348	0.171000552309262	-0.111787348246477	-0.122721457139936	0.188524252003411	0.621652787248043	0.20635006034669	0.607715350991341	0.26239166614682	0.760888022284895	0.225482270024592	0.430116761407518	0.386091434262121	0.18074716418037	-0.409858165159086	-0.232171135864413	-0.0670693366522663	-0.208101745183089	-0.433971797966088	-0.569808541226436	0.0375046857917804	0.367014006019527	0.0253252117857939	-0.178994476331316	-0.196518769212945	-0.216794456591249	0.188790433233016	0.00446444411233586	0.0374370101052385	-0.099445867447846	0.20936046536288	0.372537732586473	0.130733220207778	0.169852237996531	0.346455011774363	0.307848379988505	0.136882655111441	0.170308339729585	0.489515883275803	-0.18286386282825	0.00254899986069262	0.0976754562526063
QSF_2ABG.2.2	QSF_2ABG.2.2	2ABG_HUMAN	grey	-0.0444708415426425	0.0485520176962503	-0.0519232810581888	0.159468213362574	0.0265083220283756	0.251830143385316	0.0819658363270732	-0.150738312825241	-0.00129568205443891	0.754247837057426	0.73249813858148	0.714686722093667	0.258799887191214	0.852021184372063	0.0717065372196306	0.563487424047325	0.286118506812432	0.992726451367703	-0.0467398289780324	0.396719655230433	0.236887255761123	0.463834557397633	0.0498383000713333	0.15005512589587	0.246163774745119	-0.121229266801056	0.032529184575862	0.236341198329442	-0.226303425089443	0.0230258235140721	-0.243465603725206	-0.0442623820326562	-0.189297088939871	0.0708973005355683	-0.363679666075993	-0.285870512419921	-0.0643477041946843	-0.058355622239615	0.00769717148248113	-0.200470836532706	-0.0525745584913034	-0.324103606542309	-0.133755315173924	0.433271380911671	0.74213123572785	0.00359393086206639
QSF_3BHS7.1.1	QSF_3BHS7.1.1	3BHS7_MOUSE	lightcyan	0.170331346237898	-0.323693996620639	-0.179848380272294	-0.44048254129727	0.0572479491128611	-0.451757814037364	-0.109990008031491	0.286715645920151	-0.201344806178825	0.227330318509333	0.019239502899875	0.202022335199628	0.00108314696026204	0.686862556503941	0.000774334168643592	0.437614376838967	0.0393257478448933	0.152335991044713	0.107903268424733	-0.0796247544736782	0.0785802263531841	-0.400247041501762	0.121132436205192	0.196936560888481	-0.671726627202932	-0.153736202595835	-0.320049301729133	-0.122949551321043	0.0796171147224474	-0.518710894766376	0.0858753642853235	0.0819087880167157	0.23693394123671	0.117117459192437	0.308788225825278	0.201657052986856	0.362844636483012	0.0759156488420386	-0.0587886073865031	0.246854969658989	0.194718756533838	0.773950463002909	0.343690351976771	-0.349732372601061	0.44640996658121	0.574718035649353
QSF_3BP2.1.1	QSF_3BP2.1.1	3BP2_HUMAN	turquoise	-0.00853998066042863	0.0663399159858605	0.0206924225424681	0.230244206494327	-0.186072277319977	0.0851868102498543	-0.179428408207828	-0.170666903553846	0.226397558475373	0.952086567183277	0.640306557190676	0.884234464854674	0.100569422565016	0.186589114236025	0.548205635076967	0.203095275708758	0.226402354589481	0.106544216399832	-0.055562722640547	0.0808226538645429	-0.0603910446522214	0.0981621937586271	-0.012313292419467	0.0143991196942334	0.228490722062587	0.269748109240023	0.473671148266811	0.102839866563594	-0.107330351403782	0.0699807203858881	-0.224830173151042	-0.209210276712147	0.223885600300741	0.0770747268032764	-0.238037623945146	-0.152653721712087	-0.057958328961249	-0.102495354694892	0.137895459355514	-0.034232680355599	0.355167810660266	-0.209356326818858	0.0419599495236986	0.0575577478592611	0.695626415820532	0.568958662953435
QSF_3BP5.1.3	QSF_3BP5.1.3	3BP5_HUMAN	lightcyan	0.279275610215204	-0.314699025486451	-0.140080501556758	-0.440759232475077	-0.0273579395757617	-0.420763159008429	-0.180338605055901	0.325968795561534	-0.28216367010184	0.0449609991193553	0.0230724591994062	0.321942466757299	0.0010744093482604	0.847333989245595	0.00189647515734258	0.200774988769131	0.0183605463529688	0.0426998066579236	0.113156102233974	-0.0014740106831294	0.179895142982828	-0.295479527761211	-0.000663545425916623	0.0963654690630937	-0.565883097413203	-0.102523924824919	-0.381020764751749	-0.0678782174865655	-0.052755280425616	-0.557092018132793	0.198725886991275	0.029516545559322	0.185162256673513	0.0852311139230033	0.50335354015474	0.26095469983031	0.200903306753452	0.102642907815666	-0.0566289569001707	0.300128168883514	0.190437244594649	0.724805054284743	0.396961268233358	-0.257592904871141	0.424455844755177	0.99172540362907
QSF_3BP5.2.3	QSF_3BP5.2.3	3BP5_HUMAN	grey	0.183037512734153	-0.0620230850136597	0.113650173807754	-0.225726792612705	-0.135718022740664	-0.122581257615213	-0.052123904929106	0.238764444172453	-0.175862344011532	0.194005324211442	0.662253880796012	0.422422876219698	0.107613445820863	0.337390358753221	0.386638464099602	0.713631391538236	0.0882592010372127	0.212368198875967	-0.0762997699792758	0.0402523700497709	0.140867899381312	-0.175506602424819	0.168861416580853	0.084541609954096	-0.43833431644155	-0.0552508997974661	-0.133025186898867	-0.121461167568849	-0.0472938314912988	-0.466318239403717	0.0715780408539857	-0.0638247640858816	0.0250948548658048	0.164508264133078	0.162064859945871	0.169891219203308	0.0588970752642348	0.161519960466402	0.155945439289444	0.19728365332678	0.0881482764778106	0.495756653233729	0.338541709893434	-0.126887844775164	0.590842693364992	0.776929432208374
QSF_3HAO.1.2	QSF_3HAO.1.2	3HAO_DANRE	plum1	0.142687347118893	0.254638938717776	0.0144314398163329	0.0609015102301201	-0.158451133999781	0.177143722459581	-0.00439735190058515	-0.0690676766898223	-0.0850109742569901	0.312928684291963	0.0684929694792557	0.91912016740506	0.668003408650743	0.261889131316138	0.209002671112554	0.975318146012708	0.626592443312262	0.549034731156025	-0.169741639563961	0.246978563005649	0.323184794996174	0.129609802521045	-0.0176741690683844	-0.0793146552095401	-0.123286337615921	0.0778633712624501	0.0483992155293563	-0.233206055583798	-0.310739053999793	-0.340690721302394	0.208658367651582	-0.0156315452939736	0.101138392363	0.0250979032391759	-0.110426796670627	0.147778121123979	0.0967069445582493	-0.00207639559083972	-0.113444462817361	0.0654509069524094	0.183113623450753	0.370251706752772	0.675646970875149	0.108363618188889	0.228967480313325	0.0775382889251846
QSF_3HAO.2.2	QSF_3HAO.2.2	T229B_HUMAN	violet	0.147709824716927	0.125290421839846	0.050772561835761	0.306921973513651	-0.0324139245458574	0.0561746643691272	-0.26518488302796	-0.0329790939882813	0.0525382342894537	0.296021301874578	0.376149184760347	0.72074995490001	0.0268864715657874	0.819554485657929	0.692439438217987	0.0574382666447403	0.816462173832411	0.711453600719288	-0.369095239136551	-0.456331764069296	-0.422685799672978	-0.52719947228132	-0.482929109490931	-0.757856643548967	0.000630115395255548	0.513792331545298	0.205232412714428	0.148907894878681	0.100676410480169	-0.0393920097315118	0.125587015508131	0.096216055572488	0.315478216909831	0.0524950899169525	0.432933427309552	0.237106380535521	-0.0446140935170281	0.0257945847675623	0.36302756816413	0.221176870396584	0.200470091372841	0.172764937483556	0.364846572599384	-0.512679133083936	0.00708792892546449	0.000673541055555662
QSF_3MG.1.1	QSF_3MG.1.1	3MG_MOUSE	yellowgreen	0.218919264108731	-0.00775597742500668	0.0774221041514331	0.0669131483504096	-0.269584672446778	0.432749092936711	0.12153983043616	-0.179011896724891	-0.0488132673071792	0.118936086398781	0.956480759422401	0.585377353554782	0.637414464388643	0.0532738147394631	0.00135463133424099	0.390716236262033	0.204163343088527	0.731112731671115	-0.0405042859064458	0.30858714776692	0.166841247749736	0.352899619009106	0.220801366887397	-0.0659846671213136	0.199814091932213	0.193070626539934	0.276550810281602	-0.0349853387680186	-0.151188334578989	0.0185285844305507	0.0998000336260814	0.0169064791237131	0.0367390631990438	-0.121410111879819	-0.187410631987417	-0.0918219996299822	-0.173572138625653	-0.106676266108911	-0.325090984731913	-0.589067945066162	-0.003861613998209	-0.231671475927068	-0.0407676447015042	0.320165290748642	0.775569549492186	0.0260282569996602
QSF_41.3.7	QSF_41.3.7	E41L2_MOUSE	tan	-0.115576935409963	-0.0234934250218481	-0.124278123976292	0.087328096226909	0.00919721924784328	0.0153114855859625	-0.249564034296957	-0.233154513031479	0.0835871847786993	0.41454783219657	0.868693719242285	0.380048480453843	0.538157520367909	0.948403949895438	0.914205966531436	0.074385544443389	0.0962236515189759	0.5557701418453	-0.175820724630701	-0.151959770422989	0.0885324723978646	-0.0337631794804646	-0.138434486195638	-0.162928654428892	-0.125021395284682	0.0752748005369328	-0.0460212878808522	-0.157989107311428	-0.302255937438277	-0.339205239339956	-0.130166908658399	0.142024155404341	-0.240599931462689	0.274482246840304	0.0211465437070362	-0.0747117802568436	-0.0596973791182062	0.140361299455109	0.574523166658505	0.20250398638762	0.399919512011427	0.173251112957266	0.235722111429634	0.0127503135733843	0.212478144474959	0.282186639346237
QSF_41.5.7	QSF_41.5.7	41_BOVIN	tan	-0.100927943106565	0.167374435840074	-0.0135798300360565	0.128666080913299	-0.0453453022423668	0.149663895503689	-0.135207618863174	-0.25989686478009	0.0645501089322228	0.476507741447722	0.235621200449994	0.923878436349219	0.363320439270928	0.749571006463614	0.289606578675469	0.339227429594411	0.0627865087195842	0.649370545086469	-0.234214591545777	-0.257075096901348	-0.0994615000866347	-0.0856001319343422	-0.318987615778337	-0.160507760307669	0.0569656786566184	0.153418984632251	0.214709286680646	0.142770217241939	-0.137414369060026	-0.0999566604909587	-0.3193516975517	-0.0898757002233263	-0.135102808646906	0.239312605835598	0.0139939201235669	-0.0768748039981688	-0.0966875641104762	0.238643234297982	0.779416667388311	0.208214341866902	0.341441958646244	-0.0608455063788403	0.0512510499701018	-0.0561028201910173	0.0946774202624991	0.0657996394669955
QSF_41.7.7	QSF_41.7.7	41_CANFA	tan	-0.0498192150285567	0.0441778560598548	-0.106657768407903	0.134328739617524	0.13098513527659	0.115412008798764	-0.230077602454033	0.123268420505355	0.134012921633665	0.725786161745182	0.755816761287046	0.451705880932809	0.342405284134223	0.354663013833435	0.415218605603389	0.100822716331643	0.383961680152407	0.343551712848412	-0.249323522234726	-0.171735048344392	-0.262394144812569	-0.132212117668138	-0.356996170252284	-0.3983151079414	0.200354300417586	0.241511031361535	0.198287056169184	0.166886086813531	0.00499708171194609	0.167136508528229	0.0521025547503434	-0.189664642302447	-0.102970037913118	0.254413574052685	0.266576981873788	0.334873627422655	0.0263799109986257	-0.0398269671150635	0.547757193980519	0.146107587089133	0.120756628041921	-0.231196275293983	-0.12956474974164	-0.136214453994957	0.0746744723320393	0.223465922115164
QSF_4EBP.1.1	QSF_4EBP.1.1	4EB3L_DANRE	lightcyan	-0.386480614745473	0.428085767067977	0.0618785266849468	0.523782106774447	-0.101222961211969	0.410089486011018	0.10023836840638	-0.232504299903665	0.134758617858291	0.00465364000866792	0.00154633763818041	0.662993855994418	6.75252004268208e-05	0.475213336803481	0.00253331629278789	0.479540570401947	0.0971817022022084	0.340848629860091	-0.0667787181994015	0.159506030147664	-0.0988440460229796	0.44562052427057	-0.111124987853023	-0.172371489499656	0.798816191930287	0.206827823934987	0.241118499615767	0.0301760864529524	-0.236005878623483	0.475724355437576	-0.322651237281418	-0.211504363448838	-0.0669363991820507	-0.0857293779253972	-0.37254467973719	-0.186009881158176	-0.0464581884949199	-0.186789302848368	0.205187283244363	-0.0201087832751883	-0.26170312850341	-0.788426599725847	-0.232772803296248	0.41725769401796	0.638092217982559	0.25868549784568
QSF_4EBP2.2.2	QSF_4EBP2.2.2	4EBP2_MOUSE	darkgreen	-0.335721729850473	0.484072520617067	0.0591452146234187	0.431229487392261	-0.0571089591074655	0.156141216772403	0.101272764167282	-0.204756514799061	0.0726243271640236	0.0149680494413945	0.000276963660082756	0.677044670133453	0.0014146269102247	0.68758383758949	0.268996658604181	0.474995008920974	0.145363513500182	0.608897885603926	0.161533779700065	0.0995726417196526	0.0147469023533917	0.373331716482897	-0.14409921858903	-0.154529241481655	0.598207743425182	0.135453014717672	0.0370154875515863	0.0656670129302125	-0.257292000229878	0.28722049838694	-0.192938465690547	-0.143346567536259	0.0792260591703408	-0.272723235311531	-0.375243039395318	-0.353201404725114	-0.0692040623281239	-0.280745118985577	0.00914781723892676	0.178887770533648	-0.295315267926137	-0.40949870501835	0.155662927659159	0.319741357554413	0.252601616054475	0.482478173000789
QSF_4F2.1.5	QSF_4F2.1.5	P30_MYCPN	lightcyan1	-0.22434520313602	-0.173009945625935	-0.171700623123879	-0.219225458484409	0.027169781412424	-0.22293503662881	-0.145242688708617	0.0386785366466954	0.307832318554957	0.109841698397331	0.219995818927141	0.223560146405679	0.118408106061358	0.848371580340545	0.112152324788101	0.304250982806276	0.785440100843937	0.0264144001094469	0.272216810514522	-0.126231218446885	-0.223342232549241	-0.428700725378284	0.108506895752348	-0.137991918130256	-0.373069811448159	0.0607025681543479	0.176036117738963	-0.00189169399214039	0.288385472414427	-0.0944895158777306	-0.0827240163510905	-0.162121697288954	0.124891680328892	0.208108848977703	0.255113091469162	0.0347689781915893	0.0631770199956707	0.0106013885428339	-0.123144929281632	-0.013601114764988	0.0340700624215504	0.234906386532367	-0.169350538497166	-0.410068160266665	0.0509016845604199	0.372546860751985
QSF_4F2.2.5	QSF_4F2.2.5	.	grey	0.0701676323946011	-0.0924744956455772	0.0288494778653767	-0.190568180340905	-0.0675662802202599	-0.322701694963637	-0.182285452226624	0.0667134528668244	-0.162179543028686	0.621097177892718	0.514380431329368	0.839118173414908	0.17597899267893	0.634125774599883	0.0196339402587721	0.19587516600082	0.638421370637636	0.250684591820094	0.0185282789862296	-0.121785719483031	-0.027398723316498	-0.284351784379526	-0.175125058604127	-0.0672114211066068	-0.327639006332727	-0.0145019062656458	0.137524585185894	-0.195612644721198	-0.00608614095306997	-0.273156270167141	0.12670875154665	-0.0644277527345588	0.198520896613902	0.14254469313152	0.329749458105265	0.15900808105127	0.054646511831924	0.059440794644921	-0.0446194662775767	0.18170481552561	-0.0853860100317786	0.354158459237535	0.187165207448669	-0.277304196601071	0.896271698140118	0.389751165386001
QSF_4F2.3.5	QSF_4F2.3.5	.	lightcyan1	-0.271776175053286	-0.129835843345975	-0.178063834603167	-0.282670573576072	0.0620741092480357	-0.34125282429322	-0.0919401397336239	0.110354818537352	0.178013716452534	0.0512927045127018	0.358937610721542	0.206609234118913	0.0423127159564262	0.661992770692627	0.0132935994462607	0.516824348213733	0.43608669768732	0.206739104692871	0.295717996332352	-0.163791780201108	-0.298729330819645	-0.514224281671171	-0.0299216424194195	-0.0916954084892773	-0.404049653651261	0.0028095697434012	0.207095051821762	0.0235684355242448	0.434210890618614	0.0248427077703889	0.0225375396423767	-0.0685834350876793	0.231273420790537	0.273589579131264	0.336058110278474	0.0731751587594476	0.0684233644455629	-0.018049924503964	-0.0253560034532903	0.174399566161478	0.0411542289297204	0.24918323692902	-0.209899238045855	-0.518363421538656	0.0332978989534927	0.245941544562871
QSF_4F2.4.5	QSF_4F2.4.5	4F2_RAT	lightcyan1	-0.0285397941290427	-0.335045658154291	5.48397203936415e-05	-0.441351875127226	0.103474772690191	-0.482291229491505	-0.125352846206257	0.280090266257575	-0.00889997290635365	0.840822631599111	0.0151845694911347	0.999692143053618	0.00105590663920361	0.465395339153555	0.000293899506740114	0.375909517256534	0.0443134752400049	0.950069342884762	0.301844321120367	-0.223681544639714	-0.281746647857936	-0.641359745572758	0.0761485351631697	-0.0840405221044826	-0.607144635403784	-0.13972772660531	-0.133591436134894	-0.0193451978294915	0.464956717765191	-0.176969742940496	0.0118129998460942	-0.0815247833541761	0.143129803819351	0.0794454099040698	0.50274622625667	0.167855682031913	0.155161396727808	0.105516106183116	-0.206259729156576	0.0512142106236581	-0.159519765777346	0.485925988074095	-0.12341533856138	-0.607230225653405	0.0296509583485565	0.110924549036844
QSF_4F2.5.5	QSF_4F2.5.5	4F2_RABIT	grey	-0.267998290180663	-0.0783669383352124	-0.0385341226482124	0.0139546525839139	0.0519648980420844	-0.313734939990996	0.0213999326927161	0.116771117105241	0.0127645689173375	0.0547462071888959	0.580794103227283	0.786222298257897	0.921783824384761	0.714467763030052	0.0235190030650501	0.880304685635917	0.409709543032145	0.928436089416932	0.224184261089785	-0.338293451812911	-0.460042836612844	-0.257864066501368	-0.196096210045125	0.0314553942708637	0.128455252050845	-3.16019085116644e-05	0.343686751134761	0.192513223058355	0.419809040584737	0.449184443397862	-0.449399299866893	-0.324756748395033	0.215824183804797	-0.0479515101496372	0.000258879241462241	0.14131706483039	0.484535715217576	0.0493832577482432	0.141725710454093	0.154673435115734	-0.195733341521627	-0.295538503068679	-0.452379866099605	-0.297344664301738	0.110103550639614	0.014168348219097
QSF_5NTC.1.7	QSF_5NTC.1.7	5NTC_CHICK	grey	-0.116214462308904	0.00394296261235547	-0.114323909461247	0.0951868085441223	0.103703385660004	0.0876273382516108	0.308050424817413	-0.139675309429287	0.0800511467722425	0.411960794931943	0.977867912334936	0.419659575100669	0.502065934263953	0.464404727642327	0.536760481294609	0.0263023351076597	0.323358121249405	0.572664923496071	0.265735401990941	0.387677953645932	0.467540075001433	0.538517438298751	0.407991804396231	0.306153556622997	0.0845761676253098	-0.269338374541481	-0.101046324657651	-0.18799365966187	-0.334091992212511	-0.0983998877374519	-0.18945723898261	-0.105750038555968	-0.124430844184405	0.0888682858127294	-0.30925584975376	-0.300624233076928	-0.00680955228464377	0.0256309711632789	-0.115003831102021	0.0490568716870613	-0.116658616871232	-0.0947577741005507	-0.0552585832927259	0.526061692818538	0.0569032604381809	0.00451698822773509
QSF_5NTC.3.7	QSF_5NTC.3.7	5NTC_CHICK	grey	0.193012409462455	0.142376531956652	0.092145219334117	0.215340822861604	-0.057665948081811	0.411506870346969	-0.00157788547323791	-0.169673612434691	-0.0351230735911896	0.170397203058609	0.313994856041482	0.515885712032503	0.125239867856976	0.68469504100825	0.00243907219135952	0.991142308228831	0.229156861472881	0.804756988623361	-0.19797967179248	0.350777404833888	0.241744484881439	0.389174044191794	0.314785891991874	-0.0118888712875615	0.250239171830079	0.0417801726957317	0.0473629641392057	-0.00753596072093642	-0.338498708860431	-0.111633424990015	-0.0169025490573305	-0.119784699990338	-0.126429628303858	-0.0890298533590331	-0.274090326406967	-0.0914028911419458	-0.242430347457914	-0.198539957659333	-0.256090110119404	-0.339179735222718	0.111295164874819	-0.152089560546665	0.170302608983598	0.38371650374337	0.159452067382622	0.0107852189085075
QSF_5NTC.5.7	QSF_5NTC.5.7	5NTC_XENTR	tan	-0.0708813547744861	-0.0670587959051122	-0.0267157277540411	0.186329569362917	-0.037036110565784	-0.00526215994249608	-0.252607616622574	-0.118513559078497	0.0887067433694552	0.617542403009173	0.636680487958497	0.850876488251379	0.185969828691776	0.794348272197172	0.970466046832647	0.0708052686710076	0.402708685076474	0.531735921184637	-0.0328727528022563	-0.204438938502669	-0.00925460092490826	0.0243532452013508	-0.286773117535293	-0.0618190853472726	0.131936475839105	0.175908330650507	-0.046536656119837	-0.111459719049699	-0.25947373745182	-0.125933086109606	-0.271433105009344	0.059448727589844	0.249594009866516	0.227690838160481	0.0871887208399076	-0.00721526120092446	-0.0298101305518791	0.152705555843413	0.788231216704049	0.386027429410028	0.215084518111568	-0.0385242260034689	0.0550858780386976	0.0578501128615727	0.817043807152305	0.146002357351459
QSF_5NTC.6.7	QSF_5NTC.6.7	5NTC_CHICK	grey	0.0837049770380096	0.0568957517123877	-0.102582170186787	0.0957370905005741	0.101753976117671	0.273881747937968	0.0658327362425586	-0.301880130449618	-0.00179947707475127	0.555211430577675	0.688690801544165	0.469273989380519	0.499586125659787	0.472888208296563	0.0494460137449545	0.642869825267323	0.0296306629381597	0.989898431718272	0.0357791823473893	0.549598912363056	0.800667784465552	0.761306360387581	0.395979817927719	0.309664989974033	0.0619932043279525	-0.34659036807913	-0.346302840513882	-0.198942218850781	-0.686387100764351	-0.439791885701082	-0.165832192316229	0.102509497469382	-0.417987108367498	-0.0514386860924092	-0.402768216556604	-0.347966571614465	-0.157222727322624	0.212718758532847	-0.0507607196012623	-0.140578886439885	-0.0514348723594269	0.0158667972286348	0.241979402823726	0.789783692841518	0.801183260994063	2.44416617806646e-05
QSF_5NTC.7.7	QSF_5NTC.7.7	5NTC_XENTR	lightcyan	0.0853227424671924	-0.329109529350409	-0.0960789909631094	-0.361032952502877	-0.063705605854013	-0.487637402784313	-0.0904358416613241	0.0111863119416499	-0.0843475457015789	0.54756510330031	0.0172031757416979	0.498048556535988	0.00855110884959561	0.653664944692947	0.000245704346011165	0.523735551306251	0.937265554883986	0.552168298119158	0.228177600301324	-0.234138447055656	0.0336588180038702	-0.348165637365207	-0.00552827504961882	0.185709599619128	-0.538729577122368	-0.100153071483963	-0.135583866455252	-0.0216189083958293	0.127572678790439	-0.421522738044102	-0.132144471277531	-0.0797490501096349	0.206793929900003	0.101102909925685	0.309028156848173	0.0934264229171461	0.231114215261492	0.245574222254302	0.0572258329751518	0.12354150607479	-0.0048859035310609	0.570050210371745	0.198467356121166	-0.325470489517415	0.10374633123584	0.0947878370756613
QSF_5NTD.1.1	QSF_5NTD.1.1	5NTD_HUMAN	grey	0.11305423820527	-0.0628665463665706	-0.00607264514612174	0.0904525812102169	-0.0564161106150048	0.339890390396891	0.348892939620708	-0.270231471148676	0.140521267171205	0.424875675593555	0.65794270505367	0.965919690535535	0.523658392672189	0.691183439441722	0.0136903907867356	0.011246283716998	0.0526827707088484	0.320406987279751	-0.0315106195758002	0.439882437365792	0.450295611604177	0.540982544897407	0.243006500897994	0.087593412513244	0.158265709492497	0.0148453015154323	0.0756325440953382	-0.0398028935850724	-0.393389016056327	-0.200071964050605	-0.101952849455283	-0.105198846423264	-0.135825288122684	0.118792409266555	-0.263506669977078	-0.089684201193299	-0.0590919617442048	0.15032355252977	0.00668028153276212	-0.120398158118142	-0.0418604582961645	-0.156058661073813	0.0885203576427049	0.52658876855445	0.82450253416332	0.00110231687703246
QSF_6PGL.1.1	QSF_6PGL.1.1	6PGL_HUMAN	grey	-0.0289583781036561	0.0900733657377483	0.132563104052362	0.229637778222486	-0.153356278526001	-0.189361829367308	-0.140835744108565	0.146019575562646	-0.0912081203779392	0.838518974387524	0.525407719380158	0.348845044975033	0.101493764086204	0.27773501876415	0.178782099659626	0.319314297393447	0.301643767909351	0.520181735832369	-0.0220444894337283	-0.195276743727539	-0.31988633811098	-0.339215239395342	0.00524336900801122	-0.212972628983624	-0.0060707185420778	0.110775159689263	0.0604377519839018	0.116190993330397	0.171511384606983	0.0708927526671715	-0.0861559108504343	-0.0476906547046993	0.426819706748771	0.239253267421401	0.212209383689235	0.0696501059444341	0.0845543579236651	-0.0212359757131704	0.00607403427993427	0.473188989600161	-0.0591430068183291	0.127557463234483	0.150699901217756	-0.385644435830681	0.876727057428918	0.165342041595046
QSF_8ODP.1.1	QSF_8ODP.1.1	8ODP_HUMAN	grey	-0.160475735416139	0.213249836626239	0.0647640534358569	0.25880007092532	-0.134088117566241	0.041256581322332	0.187181424154878	-0.00832991505854468	0.0461507578171658	0.255763906427844	0.129038415395711	0.648284395928804	0.0639442661825833	0.343278533997554	0.771512521614502	0.183929984186535	0.953263812659074	0.745271112903785	0.115707251533198	-0.0489658023094769	-0.150344353640549	0.212646428457728	-0.18285687524317	-0.0418627888132677	0.449503406633781	-0.0116858811474052	0.193713035308094	-0.0443333021673917	0.0416006570451528	0.4643490087943	-0.164364161268448	-0.231793881427624	0.0406273878160377	-0.0229781236977737	-0.269075783353798	-0.110753265684227	0.120445147479521	-0.354052791744654	0.0260715766517438	0.182223761778684	-0.272114058353805	-0.436874846904	-0.13360139653416	0.147676371759831	0.414018262897676	0.730304231095768
QSF_A16A1.1.1	QSF_A16A1.1.1	A16A1_BOVIN	grey	0.263519326947761	-0.00716556467596815	0.0828623103970958	0.390812892442386	0.163049797154201	0.210992031153978	-0.0648267682006002	0.00156063912301945	0.0958262946896383	0.0590816244810197	0.959790766819277	0.559214204870732	0.00417575423088835	0.24811675441293	0.133236759067181	0.64796614422993	0.99123911935429	0.499184727803645	-0.0413941426020937	-0.159030981338761	-0.0570311577383108	0.21806107763053	-0.0527216909759987	-0.0879774958222917	0.37441302586052	0.106121219266756	-0.167677926502426	0.0529557514267382	-0.119320805811179	0.173762024950713	-0.0293613635307888	0.0105657843207501	0.0589028406592338	-0.0684762484280529	-0.0838266979311215	-0.214215732691862	-0.155555562053841	-0.0785405251671777	0.16932128283322	-0.00140083715131196	-0.201457454713414	-0.269180776068593	-0.0577983075642291	0.198905772665817	0.77077132342936	0.260124907812892
QSF_A1A1A.1.2	QSF_A1A1A.1.2	A1A1A_DANRE	grey	0.208586280421494	-0.113472708515157	-0.0347528247017091	-0.0306907715305078	0.148554104974461	-0.109660015277569	-0.296816418805947	0.164153219388306	-0.0906188839133025	0.137822129034561	0.423152459571944	0.806775432098015	0.828999296326611	0.293238517700894	0.438998821475286	0.0326179397759538	0.24488665305217	0.522892150578657	-0.070591093485804	-0.0596485289858332	-0.171029121171585	-0.376569069950971	0.0605333888360584	-0.126969723392917	-0.304198773926129	0.0517160793163576	0.183190739471244	-0.0513799751666976	0.129203025477875	-0.199623563268423	0.0659506920719228	0.0480022822055881	0.319910777433672	0.0898807532035911	0.284312757073762	0.183892046078089	0.118192879878565	0.131936922571011	-0.130044623690803	-0.0107695316163153	0.302734078576551	0.354981626070391	0.148033234050632	-0.356449310022917	0.618987040509774	0.674448964773455
QSF_A1A1B.2.2	QSF_A1A1B.2.2	A1A1B_DANRE	grey	-0.146432227937653	0.28720765926961	0.0866928334894339	0.264024762291818	-0.134310117068894	0.107107248781548	-0.186260917424242	-0.126799570001802	0.16852591868988	0.300264798210004	0.0389745796446888	0.541129155486525	0.0585789751764299	0.342472818658942	0.44979071126184	0.186134925240643	0.370380713441365	0.232368236944296	-0.0900431833618266	-0.347139012149732	-0.411366827829989	-0.0874965350419131	-0.205891142517801	-0.226977155920088	0.427939921704172	0.416860099403922	0.371703297887821	-0.0145179999888961	0.06819668174589	0.338752409256513	0.0501320743361804	-0.106321256504093	0.0286373547693567	-0.265475169726663	-0.209750378093731	-0.0135950437708921	0.0044706797108035	0.00774846503941056	0.062392620587948	-0.0397623676140377	-0.207894575633751	-0.417388197796719	-0.151628774220382	-0.115798717967833	0.525547075570301	0.0116905562239805
QSF_A1AT.1.2	QSF_A1AT.1.2	A1AT_PONAB	green	0.38002302865692	0.0241881864940416	0.040152691950475	-0.147926668828039	-0.187885122285679	0.0613048013241191	0.101784359650454	0.181954676534345	-0.0851746206840116	0.00545501664911577	0.864846357121178	0.777467694098808	0.29530494423382	0.182257071245176	0.665933820631426	0.472755353340554	0.196701612623805	0.548263091562209	-0.257196755534625	0.0254667338128504	0.133895683732363	-0.0646881072715456	-0.0997804817749379	-0.029012805482549	-0.230795333324944	0.0981917296166099	-0.155876780561767	-0.068629799902367	-0.0718264070499352	-0.249655339741987	0.880764040571823	0.339067689350227	-0.0977532943585685	-0.00636106442151153	0.133801718325295	0.224402547768792	-0.123191623891658	-0.0383882684716094	-0.136945172029459	-0.100032114252473	0.200247276693791	0.310367080816613	0.28249581087606	-0.0514424763937643	0.0656673896922047	0.857774355157759
QSF_A1AT.2.2	QSF_A1AT.2.2	ZPI_MOUSE	grey	0.146185336456821	-0.180202521925368	-0.172166493861404	-0.346842181046988	0.0275198472968305	-0.0972105414302126	0.0834231399169698	0.0360368207971239	-0.0932934637000998	0.301089350576023	0.201120696105471	0.222287360228899	0.0117672181243749	0.846441360507196	0.492977296536806	0.556548681147474	0.799781040388921	0.510646160026086	0.161719861996381	0.182695318845207	0.594366265158732	0.115555052565994	0.169566045876042	0.111758952303048	-0.495507924675852	-0.202765137116053	-0.484781763553741	-0.383619651997531	-0.35133942814558	-0.642010543002167	0.26978397561734	0.248033650477238	-0.0489796550308514	-0.0976013694516528	0.141455154074767	0.0730363230049173	-0.0682813023559753	0.2276722103373	-0.150037535586661	0.183018877821542	0.126421225139358	0.676361140803677	0.585815260244573	0.192710617790721	0.2520481959034	0.194854536617049
QSF_A1CF.1.2	QSF_A1CF.1.2	A1CF_PONAB	grey	0.0654490139614489	0.0654400721467554	-0.103993854910415	-0.237912961856682	-0.114611564800071	-0.0530795435887879	0.206052571125057	0.23423844830331	0.0167147663222619	0.644811889065501	0.644857172739129	0.463147727320061	0.0894337268851261	0.418482913756868	0.708611818679661	0.14277784517816	0.0946428462444361	0.90637665487912	-0.0476027318236937	0.281944500409117	-0.0559382884237371	-0.070384535342767	0.100676985470513	0.296490893228438	-0.097136503807526	0.0491129088549704	0.284473211038524	0.188609819901904	0.207081696980912	0.0667155138081417	0.1793699880933	-0.381599627778714	0.275260609432122	-0.0360335497244864	-0.13266372833562	0.18846726708117	0.220470208066709	-0.152572154602994	-0.346617709524651	-0.0862995600443147	0.147446186900987	0.0909181737826171	0.0786009394950985	-0.122941707918933	0.737539292219457	0.0428680694852197
QSF_A1CF.2.2	QSF_A1CF.2.2	A1CF_PONAB	grey	0.193257128793349	-0.0567481777431666	-0.20882433772841	-0.0948198215248046	-0.0495084976549779	-0.135966357295758	0.11542040827082	0.273576114947071	-0.0971833971577258	0.169845514307712	0.689457378398168	0.137363201973756	0.503723239516069	0.72743007523649	0.336498787175007	0.415184429070008	0.0497106640438609	0.493098633892304	-0.0263958022580504	0.28494897961805	-0.00748807844354635	0.0499722613050592	0.255379650403094	0.418246686409879	0.0203714279204286	0.0142029472529861	0.195274668050343	0.148560190526738	0.0345250580155597	-0.0185782243618673	0.0913204709472991	-0.280495624831954	0.229512462164687	0.0742482729067205	-0.187531263629925	0.0853769984138707	0.367907968196587	-0.281664635908246	-0.368406040795529	-0.130671590256433	0.0721498609422542	0.0149986804299749	0.0606063108085283	0.00635005294153517	0.852642320611502	0.0406082147133285
QSF_A21.1.1	QSF_A21.1.1	.	paleturquoise	-0.070628670980854	0.0734967343987948	0.0335023045521877	0.120769477709977	0.201270970443719	-0.0351628685149438	-0.310174252356743	0.26242266013097	-0.147555665100764	0.618799935801619	0.604590767362729	0.813601905750971	0.393748833573786	0.152489569296331	0.804540118028205	0.0252317673216637	0.0601841841667521	0.296531262779743	-0.16238781774935	-0.0874287955582801	-0.159826767220962	-0.00826569692609671	-0.0673632599007109	-0.131908634972331	0.289879832928214	0.281725084856563	-0.0579032533608354	0.0340547272001251	-0.0818349480550768	0.138316050450781	-0.186058897509567	-0.100363764803774	0.104982209496231	-0.147067960728149	0.013474820850446	0.547530176216722	0.641627076888833	0.0669731524551442	0.174063610358103	0.204024103904913	-0.0686325185819834	-0.151805198291148	0.0484662080363577	-0.0130320374244817	0.250068409703986	0.537687198773502
QSF_A2MG.2.5	QSF_A2MG.2.5	A2MG_PONAB	grey	0.0488374021609004	-0.0058880228059315	0.113344701271524	0.0101448272918702	-0.055890986459812	-0.0430880369433738	0.0139495957986067	-0.0597765130081609	0.0565984244635657	0.730984787338758	0.966955226476008	0.423679158074716	0.943096244656646	0.693916173467938	0.761661222897965	0.921812079630002	0.673789519545384	0.690235591822044	0.188801139475809	0.262814092148189	0.49036101759589	0.23732151617027	-0.0804401100798146	-0.0295946048638772	-0.194332332131681	-0.028107758636425	-0.174917178651555	-0.130530753321922	-0.358149527255286	-0.438275139799956	0.00859263894790911	0.053409221674263	0.0265029266102582	-0.00985875112742962	0.103196565037889	-0.0119424791364335	0.0118907232537264	0.160887245038745	0.112883854138113	0.0698948889815297	-0.156547794109111	0.335881967068285	0.377120026412564	0.255399578103677	0.180095837357268	0.0597887661853546
QSF_A2MG.3.5	QSF_A2MG.3.5	A2MG_PONAB	grey	0.227805424693039	-0.214311433873647	-0.108532657353211	-0.193950255918137	-0.0213387196271119	0.195891350128526	0.157167210482389	-0.0965469795659822	0.0817813586368783	0.104326588250015	0.127099185340532	0.443746873115413	0.168289995045972	0.880644574629689	0.163989003668083	0.265824024778807	0.49594791812192	0.564368662700593	0.0849588740588174	0.330327426416233	0.480288009284181	0.16532617279699	0.132267365233288	0.055309760059602	-0.340332032727632	-0.244013116514247	-0.222245753714749	-0.376485944537416	-0.224727841592295	-0.370319102206459	0.11406046615255	0.0799289972603881	-0.0210961170346956	-0.0519546586667017	0.0202758556870461	-0.0768936102929753	-0.140747529986787	0.00807775535319501	-0.225478642614936	-0.0884710760367414	0.0102247705319333	0.416310882221396	0.365105692242093	0.198022165518211	0.549280507448599	0.0167713805428292
QSF_A2MG.4.5	QSF_A2MG.4.5	A2MP_MOUSE	grey	0.0642948432149181	0.0655107878663965	-0.0610054738173383	0.135384044961136	0.0157299524508757	0.0785566247907722	-0.00359171939524887	-0.0684427570274391	0.0954816748804865	0.650667419056794	0.644499084861773	0.667469658819564	0.338591725717746	0.911870339369074	0.579875929874487	0.979839034951156	0.629723479379659	0.500736354197175	-0.232362576235072	-0.166965425650911	-0.15116222939337	-0.31839269225409	-0.33320148360529	-0.428926491514772	-0.129937554816247	0.280019055939226	0.312415325278714	-0.00269836737738065	-0.0101666322507766	-0.0916986699428441	0.15907974796841	-0.0216153658915202	0.31704657037484	0.233148980705441	0.277251738893196	0.212750990818667	-0.00599181963706285	-0.0095901101918722	0.193624190246619	0.305996789524598	0.380141161840713	0.23499510270347	0.290086526306858	-0.315135402264709	0.0973915017900344	0.236784146613116
QSF_A2MG.5.5	QSF_A2MG.5.5	A2MG_RAT	grey	0.164824923782625	0.242219518640667	0.168663053877085	0.287618190649783	-0.155539140711811	0.200136027605237	-0.0195346074426653	-0.159035137396237	-0.0279110106783747	0.242934412701841	0.0836165824006552	0.231982896811776	0.0386835481873478	0.270870118042556	0.154864644264022	0.890671327775035	0.260112291594088	0.844285591144114	-0.357029851781151	-0.153498119562726	0.0261093823692328	-0.0587734984424101	-0.44213600690668	-0.49825671555453	0.0819159543662762	0.442024030705234	0.0841968692980802	0.0346660712143297	-0.298952926942605	-0.267562294741676	0.297476606105692	0.0967125604599602	0.208471647997903	0.141776900454071	0.180737558629123	0.189549328882971	-0.105672435391855	-0.150777089194615	0.378127572051101	0.148123298091569	0.17011256410928	0.158214324893007	0.488814623190649	-0.0463922389205346	0.0093702012798598	0.27728548364846
QSF_A2ML.1.1	QSF_A2ML.1.1	A2MG_RAT	grey	-0.237309791309787	0.334161436928613	0.0259085124854502	0.413178820587121	0.0590040550122238	0.461258723977309	0.169575960691508	-0.309311242018404	0.18375119582619	0.0902730926417795	0.0154717827514495	0.855333295774147	0.00233190999199289	0.677773331938601	0.000578332461115282	0.229428903690737	0.0256622939833617	0.192242681346966	0.0451262476751604	0.337644777284924	0.110273688844658	0.510943271748714	-0.0726993323371286	-0.0688044963000331	0.605629552670544	0.147980867901868	0.29692369922413	-0.0104430526134246	-0.26680382915559	0.353705878669115	-0.107799182150995	-0.161744729256177	-0.00443568879826675	-0.153189659248598	-0.445865014890542	-0.210444085314013	-0.0923827411963847	-0.297194214509776	-0.106010133720799	-0.243719712130494	-0.129982200182899	-0.576163606415692	-0.136933838807092	0.465669299883651	0.750741733620817	0.0143665313828435
QSF_A33.5.6	QSF_A33.5.6	A33_PLEWA	lightsteelblue1	0.076086630638588	-0.154039128289636	0.0375339285755033	0.0671605914857121	0.139991110507048	-0.0129522104182257	0.0210403732979667	-0.070686097367006	-0.133510857581538	0.591883166529597	0.27557528565226	0.791645408199475	0.636167704340244	0.322254442216586	0.927386887367805	0.882301463509077	0.618514046383373	0.345379106936785	0.149318368639978	-0.020688302504603	0.196915411899714	0.118444255683706	0.0637756178247109	-0.0253772761109056	-0.0993985662563946	-0.265657104731632	-0.357609637726604	-0.212291989913886	-0.130489765812784	-0.136859787249283	0.0069244689785914	0.565994923246733	-0.104016573780091	0.086093269652925	0.0816034318650171	-0.36201746047905	-0.216492474988646	-0.0991274471001094	-0.0526668155458474	-0.183807897150151	-0.105438747106446	0.0903633348784148	-0.0282708803469668	0.159054111745798	0.290734198941712	0.884257357288397
QSF_A4.2.5	QSF_A4.2.5	A4_TETFL	grey	-0.0637766292508325	0.26677992024748	0.236599101922791	0.475432202551452	-0.0597198174927792	0.188651085144721	-0.00766612337929451	-0.274039227810167	-0.150430820805334	0.653303351110089	0.0558992266973491	0.0912699534019775	0.00036825646938338	0.674081616581739	0.180448602362618	0.956984459001519	0.0493100985515157	0.287113949352543	-0.0222213602391609	0.148538953193282	0.176267037389628	0.464429882443149	-0.0111184367127097	-0.00290216410851367	0.527068556274931	0.218871276818688	0.0973816364431128	0.0509264282447555	-0.42350274816514	0.0362788347692875	-0.263701290338283	0.169764994193807	-0.0370060780263798	-0.129007618290367	-0.331394998824685	-0.305567142719342	-0.10704943881751	-0.183484748788571	0.118505514237465	-0.213058548308664	-0.171337943813544	-0.385096847524471	0.124549204963726	0.463139161313157	0.875745755388951	0.293288308117441
QSF_A4.3.5	QSF_A4.3.5	A4_TETFL	lightcyan	-0.248455015171204	0.41576989943548	0.349848720596252	0.512684708805435	-0.136515177358528	0.211597773314701	-0.047816612086608	-0.128263890018842	-0.0581625199595714	0.0757252192683395	0.00217408403633508	0.011010359054326	0.000101960203816076	0.334533629700135	0.13210046479197	0.736402523153266	0.364834823958718	0.682123358583323	-0.303982052853456	-0.158562164284211	-0.261966565870362	0.14471297162467	-0.247675008854424	-0.197688659509223	0.553211550516612	0.260314069062674	0.29962647231752	0.151463042535514	-0.0426042614452401	0.39883774739182	-0.231738614236485	0.0336890641352618	-0.149998681054545	-0.0785237142232344	-0.261642729728769	-0.0581031282576396	0.0523572586868789	0.0301852367806263	0.426625860916377	-0.00321731407246532	0.00227978265876092	-0.56138006056297	-0.137406817553918	0.130285787857906	0.0284594990726718	0.261550695391539
QSF_A4.4.5	QSF_A4.4.5	A4_TAKRU	grey	0.0221930796834101	0.20415062838613	0.221377189696016	0.216569826955066	-0.360210545819144	0.289621326811013	0.0814927577518714	-0.0792349018235728	-0.238096771005724	0.875902647158226	0.146584130862199	0.114747942046745	0.123047007022491	0.00871412504983254	0.0372890616435461	0.565748580310516	0.576598156049905	0.0891791551952125	-0.369892710249647	0.120611716969789	-0.10347684121574	0.177878757297304	-0.174710845776175	-0.125945777932086	0.340635072592987	0.35114658805548	0.402003216152686	0.0786273008239941	-0.0738153263937927	0.163544320437341	-0.156762621305661	-0.0756804757870707	0.0667330002053375	-0.0391516471810275	-0.0906907591638069	0.0983452464401678	0.0880913506830308	-0.0303784503045924	0.00713896885763926	-0.278956248102319	-0.00151561603648763	-0.354870403332162	-0.0746188436073981	0.147444941792592	0.00695581228607462	0.394371580157091
QSF_A4.5.5	QSF_A4.5.5	A4_TAKRU	grey	0.0991295219527441	-0.0201825359424169	-0.116751405871581	0.277982300174839	-0.0407578838482617	0.19895547785813	-0.0603108770530426	0.0163839242077156	-0.0870029622176061	0.484438738346591	0.887068286979723	0.409789138864351	0.0460048505633406	0.77420126027984	0.157363948411716	0.671038807432648	0.908221752549775	0.53967744133657	-0.219695347464475	0.19000254240354	-0.038385998750814	0.128639805065003	0.143542129206404	-0.0211408529190063	0.215856715464462	0.255681143448352	0.470922485328866	0.147489253555669	-0.180284689521677	-0.00887697898521169	-0.0819711205531412	-0.0290835884485678	0.165766202222965	0.127658527832308	-0.0915734760879827	0.109352809455121	0.146646423714462	-0.0644398605169865	0.153171665009421	-0.277816058228682	0.54385632892887	-0.224119793808318	-0.0530329963529234	0.131985953088874	0.117601330581647	0.177289340153626
QSF_A9A1A.1.1	QSF_A9A1A.1.1	A9A1A_DANRE	grey	-0.0466653756803244	0.142324452421909	0.0243992320841972	0.287470703525086	0.0219509592050744	0.219909129803974	-0.294960269240293	-0.235126889702616	-0.0182582766844522	0.742527859502666	0.314173727897095	0.86367826624088	0.0387878971296705	0.877246049571471	0.117235664533016	0.0337737771038038	0.093362258470052	0.897775166481932	0.0130412454405161	-0.0270970553098485	0.0844287417309348	0.299244452422569	-0.0195672347750095	-0.121391077589526	0.354358849151625	0.00246489962914495	0.112083334258607	-0.19968041037089	-0.292639304887678	0.107959968649975	-0.385841095785971	-0.128771484412713	-0.0516266189336915	-0.230001591036782	-0.205836648526093	-0.20170610964249	-0.151063767505508	0.0721688802557072	0.115190368583901	0.0830722372913482	0.0366191959621252	-0.26584224572822	0.0407670598025936	0.279449217184602	0.926889088573538	0.848772694066627
QSF_A9A1B.4.4	QSF_A9A1B.4.4	.	green	0.0662026055972486	0.287296780481254	0.0891722308504095	0.142466449109762	-0.141571517346347	0.159403168388968	0.0584856189388191	0.0301222204448793	-0.134495061661317	0.641000109845536	0.0389112476175619	0.529576263545306	0.313686180394891	0.316767009932102	0.258996716667475	0.680451988269505	0.832120929039437	0.341802484802079	-0.264048134545054	-0.0323311490612553	-0.101435022110109	-0.0722186442671785	-0.0999923905311348	-0.293048866260814	0.0742392750508787	0.295875509730777	0.0567382000400786	-0.0103841402635269	-0.0512910235398797	0.00569461150787503	0.640875826076645	0.226214154891565	-0.0367358979400202	0.0110908878961708	0.0314747275603538	0.106564348250382	-0.346021459874083	-0.0394603880003592	-0.106982557821695	-0.0293296326525458	0.143747053431004	0.0220202788541423	0.253474735652308	-0.0842148691070169	0.0585558153124206	0.820007619560435
QSF_AAAS.1.1	QSF_AAAS.1.1	AAAS_HUMAN	grey	-0.187497923305982	0.255600247808554	0.0818838709356336	0.225439482962879	0.0845162187871289	-0.142180334811449	-0.109913116898681	0.13885354685731	-0.155779276521829	0.183176206543687	0.0674198736247469	0.563878888309169	0.108073941890474	0.551370799331748	0.314669051457581	0.437936746415864	0.326241242938839	0.270121858951278	-0.00234374190553908	-0.143889446765197	-0.435244448374731	-0.261878769525758	0.0971596541925691	-0.0912065821610367	0.138689423817695	-0.000442718022443243	0.150525618055029	0.261807889041926	0.421332986516597	0.456911536014262	0.0135867230701282	0.0143107903434762	0.146361012852486	-0.118075502988195	-0.023689133675388	-0.063157716733012	-0.058306243359623	0.00848268668409086	-0.399098909404163	0.193631426119464	-0.140137591842275	-0.205111846182563	-0.277547500931594	-0.321970209867098	0.986843376815765	0.308826975389166
QSF_AACS.1.1	QSF_AACS.1.1	AACS_DANRE	violet	0.0344848773289296	-0.0522189882660937	-0.0488307726481698	-0.088096689097081	0.114072352313916	-0.0325151303562865	0.133050651605798	0.0669845110216196	-0.0387723193985285	0.808236949560079	0.713131415333965	0.731019931166378	0.534572841937563	0.42069011973261	0.819000538886192	0.347059414756098	0.6370547961317	0.784932252636724	0.0620361411919675	0.178802865967659	0.166727024695295	0.369775373370536	0.325715818232678	0.804165654155787	0.226365915197209	-0.203539699372058	-0.0332327266681019	-0.0306516792840749	-0.0641416362547259	0.212878971757092	-0.0467060662569354	-0.188070237476785	-0.0125403423669439	-0.072277861531112	-0.374989204889765	-0.0224442606312018	0.172854489859063	-0.168704392826382	-0.237215613738949	-0.193376990960679	-0.00148509310215487	-0.274583791402627	-0.302941039774602	0.350340877786108	0.6621870636532	0.20470085486964
QSF_AAKB1.1.2	QSF_AAKB1.1.2	AAKB1_MOUSE	grey	-0.0802714497159351	0.257945709142921	-0.0997564871891378	0.476963821655838	-0.140335543923856	0.31319081810089	-0.108289304757451	-0.284425689700253	0.010018819851992	0.571605472216957	0.0648579078835472	0.481665985258996	0.000350312454266789	0.321053417952537	0.0237742232060307	0.444775510800398	0.0409946150265439	0.943801896406415	-0.0956864890066652	0.164022848589193	0.152249484942873	0.468334530772445	0.0169495063797362	-0.196939873679453	0.587484117744464	0.307163918510552	-0.00945200500625931	0.00421343217050868	-0.543581436365427	-0.0249110884882138	-0.262674001031288	0.0231471488668013	0.0999839804153695	-0.322210936741319	-0.395311314242907	-0.305691892232989	-0.138136605173171	0.0050906427902296	0.128977934635567	0.0399403491680746	-0.018575482184195	-0.349334465516818	0.323040056083339	0.47588327358039	0.499813894313071	0.245266795949036
QSF_AAKB1.2.2	QSF_AAKB1.2.2	AAKB1_RAT	grey	0.0938495197027234	0.156292600646199	-0.213236938138008	0.19638172959904	-0.115917261272252	0.126854081703407	-0.235653091542673	-0.131558072698374	0.044529856564814	0.508118551692043	0.268526962907024	0.129062113444079	0.162915263267637	0.413165657672975	0.370173353449316	0.0926101787028878	0.352543762067245	0.753931932973536	-0.0266427615719876	0.142213815225385	0.311924995617574	0.379416102113366	-0.189965687780455	-0.0599643149851704	0.274360647269198	0.176447418549044	-0.0564404243617449	-0.0996238263699417	-0.527175568141335	-0.223132938845533	-0.0384173489390861	0.00128221949370454	0.0418450327745224	-0.117317822688573	-0.162128484223175	-0.147797487596099	-0.0761326460398757	-0.0758110401007006	0.147606135621094	0.127823238828736	0.0338815317215478	-0.0276533877435991	0.417615484090166	0.372919780561398	0.851279162409562	0.314553936926258
QSF_AAKG2.5.7	QSF_AAKG2.5.7	AAKG2_HUMAN	grey	0.244292386020867	-0.129962454229007	-0.203546113954575	-0.15939524507824	0.0749156384685979	-0.150382045542156	0.0416809282518359	0.0640475965077653	0.0978896411933444	0.0809246619493373	0.358465169949634	0.147809544183233	0.259020699887374	0.597614042038508	0.287272057322733	0.769226737981088	0.651924531043756	0.489946714654937	0.0312661450530915	-0.142124119214674	0.0872378650140447	-0.15123437833832	0.114017926374562	-0.242680141305633	-0.338047056103858	-0.0274485882699661	-0.071901270844293	0.112190943454742	-0.123071590880649	-0.44698837018763	0.282966196119213	0.113431087081549	-0.138852635531324	0.0770344962909286	0.153920894156508	-0.0472458894081346	0.0359967751454678	0.0706286531569355	0.0672083353925751	0.0625164984676492	0.337184044000766	0.363063583204583	0.234167250037073	-0.11511249284607	0.825842868386371	0.314862395955903
QSF_AAKG2.7.7	QSF_AAKG2.7.7	AAKG2_MOUSE	grey	0.129701742550356	-0.0698950659642801	-0.209465437446103	-0.191205755299377	0.239708776189141	-0.15510391527519	0.0334051292887042	0.18800039752524	-0.0829035662063247	0.3594384132916	0.622456998131528	0.136132972229449	0.174510407996964	0.0869707376478784	0.272229780251797	0.814132958833872	0.181984071925909	0.559017918717931	-0.0206541830224461	-0.140144728656534	0.0410344658095937	-0.270641463177076	-0.133014956778099	-0.188630696298998	-0.304509020983181	0.0347492700360123	-0.145484671239315	-0.0437905791078067	-0.0082963069158153	-0.249482534252448	0.289481339902969	-0.0211128786275013	0.113598685481607	0.0748992446697893	0.394350177751556	0.415771042821911	0.333686164142899	-0.0796597668826999	-0.068236775547133	0.294793629030118	0.19347139990044	0.468228901501206	0.334067586183176	-0.250284428510643	0.884446941180329	0.321718431724166
QSF_AAMDC.1.1	QSF_AAMDC.1.1	AAMDC_DANRE	grey	0.0974498909335217	0.269484585385693	-0.063953990708021	0.445519245780824	-0.0524578275325753	0.271943391426075	-0.153948359468199	-0.113562500203665	0.0215253336013637	0.491908054377491	0.0533657521167282	0.652400715116808	0.00093366561247485	0.711876055464972	0.0511440306266097	0.275861729256317	0.422783224672205	0.879608456859141	-0.244777277509889	-0.113478199352805	0.0235322938872698	0.199329327154163	-0.260321641233992	-0.372616975289537	0.469426003180477	0.459567455069581	0.0487483079790533	-0.076351944411888	-0.427696818949284	-0.0309873947885257	0.0398619005506286	0.0672276547889497	0.277470158990546	-0.24143450771335	-0.0699495529674083	-0.0767530021109634	-0.121643501773551	-0.0798047589375422	0.193219417924963	0.262730284373437	0.186939989492642	-0.152953392429375	0.456608070540595	0.218672022855839	0.0803049144970413	0.423129875292527
QSF_AAMP.1.1	QSF_AAMP.1.1	AAMP_BOVIN	brown	0.00232405267008662	-0.113780315461021	0.128871206968532	0.00490249554204971	0.175429336084012	-0.134134630033967	-0.0569611370772456	0.219094811367042	0.0592664485947059	0.986953892982433	0.421888301156407	0.362549541170386	0.9724838641519	0.213514022968257	0.343109626510525	0.688351254579043	0.118633166485835	0.67641909774101	0.0768312005379299	-0.327369533089092	-0.67874204199445	-0.510745543073194	-0.155842518775273	-0.0777990148241523	0.0346375861404471	-0.029622271152383	0.0627641287719534	0.220479599382912	0.733299598565953	0.610079437537338	0.0444068848845671	0.0152576495885374	0.227860333641302	-0.00951347743989706	0.240008087849025	0.0147995336171053	-0.0203234719804412	-0.157703426187648	-0.0506496674506314	-0.0839548487611163	-0.189469320249932	-0.226269156995686	-0.560061803448099	-0.547203354927559	0.588251991707673	0.0178364557103931
QSF_AANAT-2.10.17	QSF_AANAT-2.10.17	.	turquoise	-0.0473775064868417	0.295423272240914	0.137859803455346	0.274209511744959	-0.263010565525686	0.134590833663682	0.118987433220964	-0.100400149018254	0.0667835487843081	0.738736962106353	0.033482330327998	0.329749320433047	0.0491634747714596	0.0595910810863954	0.341455678177216	0.400816830657335	0.478828125112622	0.638067858641654	-0.211595197752844	-0.0282975296842045	-0.300885832181446	-0.128461133104057	-0.193254758938729	-0.080870263754098	0.206726622573239	0.321663732172122	0.802022288135621	0.115697041208853	0.0800834969648347	0.201103458858886	-0.0286281933477356	-0.243818040302943	0.263269963124937	0.328906099250526	-0.175772375917608	-0.0211914804378711	-0.0421604885843894	-0.481615149271357	0.153056513851089	-0.136087957720691	0.256853169323503	-0.251712997769035	-0.0212826630130968	-0.169454608043119	0.132105280754243	0.842156527952633
QSF_AANAT-2.11.17	QSF_AANAT-2.11.17	.	grey	-0.100618398895327	-0.0491062692870103	0.0546129737653464	0.146934258477617	0.104020282844118	0.0781177940527557	-0.0676762286003807	0.0311361652099615	-0.0651862847098564	0.477867890751417	0.729559953116016	0.700583007863915	0.298592654345728	0.463033452263687	0.582001082646855	0.633572841755364	0.826555684987901	0.6461429503694	0.201450709051465	-0.00827219540671907	0.0969395623785683	0.325672458312665	0.0936115258498244	0.261398130977129	0.285442137862305	-0.00852411115100504	-0.0481470773190879	-0.114522498969502	-0.102395096298152	0.205757350933098	-0.140198409263111	0.166664898437459	0.142743148631857	0.0872776090156362	-0.122948598219848	0.0692585941892344	0.163951081349167	0.00376763469985829	0.105303590611431	-0.0679804419331291	-0.164678597578629	-0.277552961261351	-0.224331773152994	0.315710195757733	0.152115912501911	0.953587301410207
QSF_AANAT-2.13.17	QSF_AANAT-2.13.17	.	grey	-0.0696727615696202	-0.0967488338637419	0.100619338581069	-0.0719920990518792	0.0651156824075342	-0.238002263378225	-0.0689062007245722	0.0688093870819666	0.22121370324982	0.623566989390119	0.495043281473042	0.477863758623131	0.612027476227502	0.646500829317592	0.0893099754348644	0.627400864619013	0.627885765385281	0.115022970973384	0.118948268659072	-0.300810158996369	-0.2979675186388	-0.437870540831189	-0.376131674212853	-0.334622286421213	-0.184787276007865	0.0468111579147018	-0.0246602087658321	0.12354500914489	0.333025119455906	0.100110639723128	0.0332723805925198	0.186223340738338	0.0144663356408415	-0.0620221533029853	0.267715273701587	-0.109437318093729	-0.0614447837865804	0.110236486958155	0.135928457465113	0.219392904781323	-0.00477943004483509	0.114451517403861	-0.095075711984658	-0.4480211479626	0.400972991366652	0.0302421033235039
QSF_AANAT-2.14.17	QSF_AANAT-2.14.17	.	grey	0.271898745692349	-0.123582165036647	0.0612112698416429	0.0274775315318147	-0.0528063257635454	0.234380382087093	0.0161038223181086	0.0102361757133522	-0.171639600701752	0.051183691357155	0.382743181482124	0.666413581615446	0.846674637149808	0.710045677214326	0.0944373537730507	0.909784249139361	0.942584713227634	0.223727236839715	-0.097435288863851	0.0229547570138704	-0.0109117458626054	0.273571068698259	0.0602908385384735	0.171262021856667	0.291077859869246	0.111498566270268	-0.117473734361216	0.258644473317151	0.061261557615458	0.277345384689189	0.021367588995217	-0.0684905867438601	-0.179742819775768	-0.181742022492863	-0.11695799659746	-0.0454035092282864	-0.0213924797589005	0.0122145268821715	-0.137941267608698	-0.328699894778338	-0.18188320403425	-0.333075724367448	-0.268131334743364	0.229541166520769	0.491973251386193	0.871678767712588
QSF_AANAT-2.15.17	QSF_AANAT-2.15.17	.	grey	0.011057270544018	-0.0656209627758984	-0.155667788250317	0.119500434280814	0.0650538129261427	0.100373831424137	-0.0856470093336115	-0.000811505978227438	0.0857724096702077	0.9379878146562	0.643941344231284	0.270469083400028	0.398774616251838	0.646814507317701	0.478943983667769	0.546038562892204	0.99544442530934	0.54544876891158	0.214675820323013	0.100405300483398	0.194813424630592	0.309878113530487	0.0681222407663583	0.0199689722401384	0.308929289704152	-0.0272156790072772	-0.135628495079903	-0.0392605142944518	-0.339093578119296	-0.0268147397602809	-0.335250339586245	-0.0669899415850922	0.014324594751182	0.0437688208168272	0.0290805566698594	-0.234256699742076	-0.066145851179101	-0.164800503545814	0.14823688366465	0.117037429983091	-0.0344586162771296	-0.19612390474295	0.0435380991273093	0.333045324845474	0.126438651646243	0.478805448435099
QSF_AANAT-2.4.17	QSF_AANAT-2.4.17	.	grey	0.0186348693586748	-0.0330095421507752	-0.204100532231315	0.0107138427509421	-0.0244608141421961	0.128792788483598	-0.120379948506036	-0.0223471618024908	-0.0923690315626528	0.895678264364359	0.816295655585145	0.146685393683202	0.939910259617088	0.863337477438721	0.362844133631117	0.395287512925852	0.875047904715861	0.514862317332766	-0.118667871757568	-0.0123070272056681	0.188796282930203	0.307882861693709	0.144077394490576	0.150662659597431	0.239079198518093	0.0489484206738905	-0.0755277699663419	-0.0122625822931394	-0.403964807110037	-0.105409618696219	-0.23083912810507	-0.107024146455187	0.0243751740731	0.182640201578261	-0.0568054618831826	0.155039851651565	0.243677794819052	0.00671655561848422	0.246954732854861	0.0960737671275343	0.129108776215671	-0.167307522073467	-0.00652517950694566	0.342132480117824	0.402092051329122	0.930994947342638
QSF_AANAT-2.5.17	QSF_AANAT-2.5.17	.	grey	0.0488295617122072	0.0396045593755687	0.00564804079396501	0.0859112014387204	-0.0638883309451033	0.362874981831391	0.0796902119768043	-0.0167972247123751	0.00608547821480782	0.731026350539632	0.780429455422994	0.968301352104801	0.544796348724345	0.652734816315946	0.0081955454848043	0.574402633389058	0.905916862514515	0.965847712653541	-0.0309957482878069	0.158638228843867	0.176945146222804	0.306938964517534	0.389072340578619	0.0723254916311775	0.0977782183920475	-0.0876097865554402	-0.0400747867512227	-0.152449509698556	-0.129361717087195	0.0427928093807449	0.00686887197684941	-0.00675317392087084	-0.13329413788205	-0.00397313600604439	-0.174828535801668	-0.0953552113694567	-0.150549943977408	0.087736704326699	-0.185729938033402	-0.361495779176161	-0.0447352468217296	-0.174085531621506	-0.167957731826224	0.307058547504058	0.827325894850008	0.261319009179047
QSF_AANAT-2.6.17	QSF_AANAT-2.6.17	AL4A1_DANRE	grey	0.244273534280666	-0.169301862637787	-0.209541446862383	-0.26240829608683	-0.0028905033264038	-0.170260115720772	-0.1031493813503	0.250309159455656	-0.00391392733493024	0.0809488324711348	0.230193687377195	0.135987663621161	0.0601987343677229	0.983774496521648	0.227527640062738	0.466807266341563	0.0734960421657984	0.978030849013134	-0.066645436981774	-0.122039900617286	0.0124917436168821	-0.309279054880274	-0.23657414691889	-0.158337825747588	-0.338248072648793	-0.0140671384206588	-0.168522358765995	-0.116387022148366	0.0263170056214116	-0.265326778925911	0.193501526133065	-0.0642509252709365	0.151523491423587	-0.0199186579965341	0.330035073882589	0.383499190858456	0.368270920266475	-0.0523694281018523	0.00133754302510529	0.365811739886959	0.0722126384063055	0.45110297869222	0.319477081835742	-0.300377012978328	0.638764468689603	0.388755028570663
QSF_AANAT-2.8.17	QSF_AANAT-2.8.17	.	grey	0.0274784736380879	-0.1961505142972	-0.0459055808246855	-0.321729759808604	0.0329885952692651	-0.167797479210697	-0.0856379949820591	0.119976630308887	-0.315568647378678	0.846669443402457	0.163420892564246	0.746579173146712	0.0200268984365726	0.816410211323124	0.234422482666346	0.54608097179679	0.396884367337669	0.0226758132255383	0.13578464076704	0.0101910953276703	0.29053407822311	0.0016459989120894	0.277598554229853	0.15243137483529	-0.376090895407584	-0.317559629365661	-0.356155628863925	-0.306890413984807	-0.142307648067669	-0.386727602702449	-0.156945717987639	0.169676077125564	-0.220807596138058	-0.132028578526814	-0.0472147681668036	-0.036314044759295	0.139355331228998	0.131786885928315	-0.152282689388905	0.207191807390395	-0.123443355193901	0.407505347210775	0.229358987824836	0.0571936101384291	0.337151042129644	0.942837150793141
QSF_AAPK1.1.1	QSF_AAPK1.1.1	AAPK1_HUMAN	grey	0.0992359993143231	-0.343207528397108	-0.0733245399323928	-0.286558855196341	0.133503365068139	-0.0603211884496456	0.0467279428635459	-0.0237151372653586	0.0275123117766876	0.483967251755514	0.0127415517548862	0.60543984973719	0.039438200919626	0.345406423327145	0.670985769972842	0.742194550374116	0.86746561731073	0.84648290106429	0.0274326391043869	-0.0569208667351189	0.0191570134652319	-0.309762873461928	0.197539903446488	0.20133000924338	-0.531798146923021	-0.309134882569121	-0.235567602580261	-0.0486462834371336	0.248491499543136	-0.197208970179212	-0.00319425082838541	-0.00857943067393971	-0.0701920543354315	0.172801579358659	0.238240408634161	-0.110210057419415	-0.126852379769914	0.223890320654179	-0.142143624637795	0.0254722986164399	0.0134101008893125	0.437330228960716	-0.0463381945680628	-0.294720608915764	0.846922132556496	0.688560371738121
QSF_AASD1.1.3	QSF_AASD1.1.3	.	grey	0.337337803784504	-0.213441975941374	0.0583686221281422	-0.118855809933162	-0.0920785807002503	-0.198520429022977	-0.10741309995636	0.0712887585675379	-0.199738641237455	0.0144611412401328	0.128685790894657	0.681057030036407	0.40134179221632	0.516190618707122	0.158292409624622	0.448490080608283	0.615517162880139	0.155702652971619	0.0219578748579217	0.119264541568815	0.355878060357034	0.16528704916302	0.148425992711744	0.119554176939348	-0.239651890293146	-0.259013391891529	-0.242071518234199	-0.0401504361702495	-0.28639098338877	-0.424645811603197	0.0114057935339049	0.34156791498297	-0.303053786287663	0.164151363732006	0.164941753018867	-0.0763890918207463	-0.0249381667423703	0.281054666354134	0.0576407475991229	-0.0730910637379867	0.0777604631524153	0.279364550073187	0.181372969255598	0.20387043480796	0.87720767338393	0.399712929971977
QSF_AASD1.2.3	QSF_AASD1.2.3	.	grey	0.332839740071857	-0.267072404531672	-0.122328546864733	-0.189417939691473	-0.0719987690066118	-0.0996937471035281	-0.142002548807497	-0.0143854237332763	-0.115788925712144	0.0159097335076629	0.0556206575129118	0.387625647237042	0.17865101051047	0.611994423310822	0.481943075679971	0.315280776642172	0.919377206568211	0.413686559193287	0.100616549856421	0.140289595486597	0.380545033182755	0.0698240095909947	0.00766767394824808	-0.0396819053087443	-0.328904464800633	-0.154137245094844	-0.198347541932807	-0.0455377796255114	-0.204794954138347	-0.456543168852991	0.00473250139084567	0.226290765886633	-0.183543473627493	0.114332043489017	0.208956243040557	0.0326016502254216	0.0490453012415953	0.13356135069719	0.00961416690364373	-0.0384998286508549	0.0252314305337488	0.361019312801287	0.238620916658021	0.0867595266272808	0.477876021680297	0.32121347404273
QSF_AATC.17.41	QSF_AATC.17.41	.	grey	0.175995667035203	-0.213448382068833	0.147314811219437	-0.224050003400244	0.219151226191271	-0.377187323462435	-0.237568998916454	0.403785657250979	-0.297188529219794	0.212016268752244	0.128674046541554	0.297329148813783	0.110322353126115	0.118535943124087	0.00584348020471939	0.0899116321255532	0.00299272588106963	0.0323902222574381	0.16368900996298	-0.241084688297208	-0.27753282446913	-0.464549594906693	0.0896830242538023	-0.0161758583950641	-0.371513746274607	-0.0708397898089717	-0.116859863079918	0.11148790246455	0.406736644795348	0.0447306233509345	0.236594119632927	0.189157500201393	0.0580367573906642	0.200560618254962	0.446709384515259	0.291320627068914	0.0855757386736367	0.105090402632983	-0.0640758669853605	0.0623273797447342	-0.00744182553742424	0.305425875071552	-0.166415369887719	-0.458143145159719	0.246242051557333	0.0851198241835596
QSF_AATC.19.41	QSF_AATC.19.41	.	brown	0.0461650628552952	0.0553761744049998	-0.228084462416808	-0.0821460783072488	0.0356812674694201	0.259031514239254	0.091859454763897	-0.134659488552894	0.149585872545777	0.74519481507651	0.696598995294055	0.103891308195556	0.562627040810275	0.801716334766421	0.0636985463260026	0.517193873161771	0.341207201643908	0.28986095513596	0.012998785785608	0.399267798974883	0.720533024954194	0.518005184353137	0.0779719503192175	0.0492793890908287	-0.0306282629950196	0.0527180936540202	-0.105231965817786	-0.278968295082613	-0.713686252491715	-0.58115459236476	-0.0171429586116733	-0.213648975022134	-0.295758857488772	-0.0127471417119713	-0.124196593809513	0.0041022091992698	-0.000891991801343512	0.0732461777598102	-0.0110752465125716	0.058058254310191	-0.131518821888787	0.188446232508132	0.46623339303196	0.551653049727914	0.927126478954767	0.00336585531920321
QSF_AATC.2.41	QSF_AATC.2.41	AATC_CHICK	lightcyan	0.420036856392584	-0.43475966322626	-0.16510238705469	-0.445450196476465	0.0551476410927582	-0.504858722134647	-0.132720934100451	0.426725981720942	-0.130333763487608	0.00193478524732853	0.00127875164985134	0.242131098630371	0.000935582786947483	0.69779112559479	0.000135198511252682	0.348266378161725	0.00160662234591016	0.357081840315743	0.0524478057243063	-0.230129699650749	-0.143794377669109	-0.665419641686029	0.0121637023910623	-0.0279723269713281	-0.746892792406098	-0.0474443717912196	-0.125506644805589	0.13920753196873	0.326017005350608	-0.435697184281678	0.308452367103236	0.026774304019592	0.289541610395291	0.177359899220191	0.614291296054848	0.244973740358068	0.148667549119605	0.0902390775088359	-0.1846136813823	0.204013878092629	0.283788200667691	0.778118573035288	0.228838385555444	-0.64148405121984	0.711928715766207	0.100743458293566
QSF_AATC.20.41	QSF_AATC.20.41	.	grey	0.0502006111299144	-0.212175130046034	0.111569102046682	-0.022732682819287	-0.0239528745410611	-0.449883572916816	-0.249861696905735	0.103424803162237	-0.0502322671417896	0.723769982134576	0.131024208529149	0.43102329974199	0.872909918488273	0.866149094581644	0.000819414805147784	0.0740291885423397	0.465612015556602	0.723602721790207	0.195485320203078	-0.422151501299569	-0.372367811512624	-0.480355712577003	-0.0567758713271267	0.0202963226939897	-0.189251419118637	0.0419126176448544	0.0407938720674778	0.0347883517645637	0.355152533290968	0.0896681424795958	-0.0488819419003433	0.0279001069528747	0.609472154510757	0.242148168105455	0.436119112041756	0.0221173862007119	-0.0499583713156488	-0.0412457495849244	0.0879043255382095	0.304707705295261	0.0931502103066434	0.217871643358068	-0.104683571674346	-0.476598699857271	0.164881956533293	0.00182511926719781
QSF_AATC.23.41	QSF_AATC.23.41	.	tan	-0.0591385183890144	0.031634260556304	-0.100984690729767	0.0679772059344763	0.0123695162496518	-0.237610004339305	-0.325116533615358	0.0616733139914302	-0.0419824093527011	0.677079229285854	0.823824859778258	0.476258613432459	0.632060235526765	0.930645428367761	0.0898545543996242	0.0186857733665087	0.664044860678674	0.76760396199445	-0.0707004211366312	-0.194751222205442	-0.165002514011472	-0.160580824675903	-0.336987219303796	0.049197870255241	0.00115771491874694	0.0884289613892938	0.163509955362427	0.145199559533181	0.0215941848024307	0.00121486078511407	-0.026440207044233	-0.0520459108692459	0.144556226716037	0.191740231493605	0.20426395788091	0.148795694668201	0.109070949667774	0.199783041093841	0.595488187647444	0.222977741567728	0.466442553640446	-0.0222253459817791	-0.134675166223087	-0.148795215404147	0.618442746174327	0.166505407181144
QSF_AATC.25.41	QSF_AATC.25.41	.	grey	0.0323737750672943	0.0693750758987993	-0.000769278000606107	-0.0208684856712525	-0.0362289422385283	0.163603277065616	0.11246912701282	-0.0655004593064127	-0.0524856264227155	0.819774266754183	0.625054666809894	0.995681479428175	0.883256281681079	0.798735808986435	0.246492931070961	0.427291753135016	0.644551381290737	0.711729991203266	0.0875541917664272	0.185808176850075	0.477134550996138	0.443448998379504	0.0824009931937901	0.148336021455048	0.0353553658321622	-0.241716942981617	-0.236737621032578	-0.282050091246743	-0.404944975244708	-0.167442203747485	0.089167604105748	0.259122227029399	-0.190154498386701	0.0849730866273473	-0.192201891771792	-0.172483837546696	-0.261438158532232	0.0125735533473025	0.0988153297813023	0.189914968062936	0.0900573045131129	0.0246169924388399	0.138862578150899	0.463588294746488	0.537101809047399	0.1872263222526
QSF_AATC.27.41	QSF_AATC.27.41	.	lightcyan	0.303614500389986	-0.505318645469681	-0.135233632448492	-0.596463988934606	0.0416836659043662	-0.449361285152769	0.108900862941514	0.111348625469398	-0.0841438607637875	0.0286614591223294	0.000133000194802027	0.339133650021218	3.0669409190193e-06	0.769211997653705	0.000832390834001886	0.442192996539433	0.431940192529571	0.553132066829018	0.259616087850269	-0.0138700935408155	0.260310973058642	-0.330412508097361	0.0975059983720472	0.211154945610682	-0.84059169278894	-0.363478096362665	-0.381224367723057	0.00854843332239001	0.239614760672839	-0.483742647328531	0.244918848328267	0.175952274877439	0.0484524932937753	0.119960480666655	0.440664282590418	0.160476265688577	0.043171482167465	0.3382090349372	-0.248228751535553	0.12807999389729	0.1431802368066	0.806701441261124	0.197796061413428	-0.325545873860104	0.0630812795577623	0.922256318241729
QSF_AATC.28.41	QSF_AATC.28.41	.	grey	0.165957439754733	-0.280316387843091	-0.261990224088074	-0.213457201214965	-0.0411005771448359	-0.197284994290946	-0.137275179101036	0.182241359410065	-0.188773640503637	0.239666946332726	0.0441351032024353	0.0606234648116745	0.128657879722641	0.772353337297507	0.160950936512804	0.331824165112591	0.19598518961493	0.18016044789896	0.0603336903972321	0.0893672426095004	0.178570861023763	-0.172505609370295	-0.153679436481035	0.0948483441392733	-0.437078833948169	0.00532529608736423	-0.0582206080538626	0.101064241148873	-0.0137460291209909	-0.406863922706086	0.032411696009087	0.0235600813856822	-0.164266713977193	0.332855596723343	0.289501856552869	0.0439348398371557	0.0814182335996046	0.055903679190539	0.169826922796747	0.028641332602416	-0.0205488999284801	0.394207807022717	0.12182357658538	-0.150465283953417	0.670921467377473	0.528672781638494
QSF_AATC.3.41	QSF_AATC.3.41	.	lightcyan	0.382233705596384	-0.41233787205671	-0.206305899360436	-0.45837184777536	0.118013832093906	-0.559872314536283	-0.169042398756429	0.432730205748633	-0.11141794136926	0.00516804182587396	0.0023852757936789	0.142276472505842	0.000632526393433634	0.404709363203534	1.59277938287282e-05	0.230919256720931	0.00135536283377535	0.431651811467251	0.138228750518326	-0.248184494015884	-0.0851277387552611	-0.641723309106839	0.00732908986037768	-0.0733671100725353	-0.7578182506529	-0.108787218177361	-0.178642528181602	0.0795894454445227	0.267279701433212	-0.478087110631165	0.292641840255543	0.0706914958046927	0.293522682886633	0.174499440031558	0.640778936604389	0.266660832122568	0.191609425829225	0.113662283713853	-0.12597335984751	0.310268360094903	0.302879547403038	0.817647215843093	0.286635420687262	-0.613250224056988	0.328444121888615	0.0760548825896822
QSF_AATC.33.41	QSF_AATC.33.41	AATC_CHICK	darkgreen	0.154555695160188	-0.197941379012147	0.0138795714656589	-0.476504022858068	0.00325516061732118	-0.454090927200426	-0.0375180492090334	0.342929305319468	-0.20409034109232	0.273948877760613	0.159534422136262	0.92220335674521	0.00035561421988264	0.981727862903735	0.000721340588959583	0.791731586673746	0.0128189063216138	0.146706000086083	0.0205430534739603	-0.258049597294738	-0.203810626613956	-0.704176741637873	0.0026340440619798	-0.049525205224208	-0.746594320058801	-0.202499635800615	-0.193650583260698	0.0227186840238173	0.430936494666436	-0.303057574426702	0.225145472436796	-0.0319878182107856	0.16880270603799	0.180474595511804	0.560109384873865	0.342745018098506	0.149577658749478	0.101312163914772	-0.13412934005126	0.330400790488347	0.180012839488347	0.744891982256176	0.195604023402546	-0.68441960272723	0.885064473649325	0.0647462569357711
QSF_AATC.34.41	QSF_AATC.34.41	CXA10_MOUSE	grey	-0.211544965183234	0.0671738217770909	-0.187037030786244	-0.1573844963916	-0.049367732235123	-0.0439613293790419	0.11832636340088	-0.114391615410149	0.160640460937505	0.132199235431913	0.636101070663673	0.184274611730706	0.265155340339717	0.728175224393278	0.756976880162204	0.403457456612837	0.41938245267049	0.255269828610945	0.227539949582776	0.483476326175265	0.380966086391587	0.38813226129202	-0.140154203765773	0.314655544296215	0.0844798832997637	-0.196026953231657	-0.0945097034613232	-0.0692360573733772	-0.21501738392329	-0.0466987725929611	-0.200279363938004	-0.406089193138306	-0.0342761618861995	-0.228188334720085	-0.352526876495414	-0.133183038887881	0.109962439300569	-0.180448148618052	-0.0623347047750554	0.118236021067904	-0.169144612211993	-0.0421739951943625	0.121458746424984	0.344765311769118	0.104742013935488	0.000282530701974062
QSF_AATC.37.41	QSF_AATC.37.41	.	lightsteelblue1	0.257215906189774	-0.108206758714383	0.247296083533019	0.29236309155505	-0.0178432570358818	0.209112964972387	-0.0796253142183395	-0.194990932184499	-0.109802186722823	0.0656465912196324	0.44512472756042	0.0771455112574722	0.0354478732160438	0.9000868349196	0.136808319798275	0.574715338223318	0.165974014779962	0.438402059513331	-0.17539525026167	-0.0962587679828615	0.00869367113798176	0.0489042503852526	-0.0972576097282285	-0.232216972044105	0.105807939465839	0.159745446213306	-0.136388912697491	-0.151412287263496	-0.0844191030000797	0.020922694463649	0.255408762231188	0.814945899178065	0.0155038592982968	0.043369616388524	0.05315272923228	-0.159063168679946	-0.236401157228187	-0.0319082108038817	0.0420971753208376	-0.259595263895731	0.189633820657664	-0.0280919210534542	0.0903655886392424	0.0733870092628919	0.213604404050916	0.497241057315805
QSF_AATC.38.41	QSF_AATC.38.41	.	darkgreen	0.198628920586036	-0.241271398268266	-0.0208954946326641	-0.50639107882217	-0.0956558751016977	-0.47803568407778	0.100139074328638	0.413410369790972	-0.165291145171427	0.158060496390889	0.0848710549548318	0.883106238738923	0.000128000455605436	0.499951720296041	0.0003382303366029	0.479978116666502	0.00231740343345237	0.241585641250015	0.0453342573898377	-0.164324425499319	-0.144261088691957	-0.647101444474736	-0.0372669533427394	-0.0764331913390572	-0.737783768107764	-0.142959243646389	-0.0455180839348621	0.139692254878107	0.424004401887566	-0.326819708093859	0.172894949060705	-0.0648198278145479	0.216698893299835	0.139766965698392	0.513946306717836	0.30890245051327	0.201129991117998	0.0340213647273279	-0.17735927567073	0.273649357072896	0.196443473628676	0.715363492678324	0.218712354414694	-0.635178754875863	0.74963002180848	0.244388049346727
QSF_AATC.39.41	QSF_AATC.39.41	TC1A_CAEEL	turquoise	-0.0456350574398693	0.338365900242152	0.126599666077069	0.222950906517614	-0.209151272847978	0.0381638445610292	-0.101902888281774	0.00343458805466128	-0.16004886897232	0.748023282472327	0.0141463596436067	0.371141737139079	0.112126116057814	0.136734799627143	0.788228810095846	0.472237265877062	0.980720871074864	0.257047246500727	-0.305924496894849	-0.113168878714986	-0.239708480564187	-0.0801089304501777	-0.121902084445831	-0.131557449889024	0.178146897812136	0.229432081172091	0.5893192407304	0.114334646370104	0.0146856807824646	0.0736024129714214	-0.206220548286291	-0.409669744009041	0.0654822415018584	-0.264253189326994	-0.21332500081071	0.0240791239396655	0.0173037767142149	-0.0211805906475365	0.0727038180097681	-0.0518678345731941	0.162137498609617	-0.192504939962885	0.0876564403776016	-0.100136291028626	0.0274118139111914	0.424403203309424
QSF_AATC.6.41	QSF_AATC.6.41	AATC_CHICK	green	0.290090634419953	-0.274644206020544	-0.0333212333699103	-0.45569467579543	-0.0398111823117978	-0.217761525193283	0.122803456228256	0.193433574810615	0.0176322728175615	0.0369684230920544	0.0487907872329805	0.814591508273354	0.000686831705196672	0.779312630611787	0.120948593704461	0.385771703098158	0.169448545398037	0.90126233797124	0.0587682090501607	-0.00916724640830901	0.0253671313381365	-0.235773703418774	-0.0171843837334403	0.166473696494974	-0.441810289578106	-0.0658701160730616	-0.174356156333659	-0.0840015050160774	0.277129871653046	-0.0755736822101775	0.831023641692527	0.254772589802335	0.0247660304626992	0.0779139027776509	0.315367547726924	0.239701654471728	-0.0989832037458768	0.0214401237100721	-0.365912920058725	-0.163087752979015	0.0425119568359397	0.370659230747383	-0.0443734466516813	-0.243295589409742	0.678991413997347	0.948571870033429
QSF_AATC.9.41	QSF_AATC.9.41	.	grey	0.0467309160113265	-0.00390435058738504	-0.0635717260405066	0.0426278182254913	0.0616789835017546	0.075104681425271	0.156571933338548	0.0673865410026914	0.0281755380100278	0.742178712928988	0.978084590848596	0.654346766586588	0.764133260827733	0.664015815444407	0.596687205885058	0.267661717384065	0.635030113640259	0.842828374777873	0.0353415249132065	0.258287361337879	0.32406625201165	0.351874746268555	0.0532070913773365	0.0952469627417133	0.157377992848252	0.0332112145497425	-0.229104840618635	-0.135171922289461	-0.370006015182685	-0.164740250507919	0.123677557592136	0.186137579543922	-0.0488624040381614	-0.0980022951280164	-0.100935499954412	-0.0882865018155673	0.109760826819057	-0.161943453992897	-0.050777777409754	-0.12100023586653	-0.156832284810223	-0.0413053034177911	0.186393400578939	0.39951783695624	0.803566673290253	0.0644913051638084
QSF_AATF.1.1	QSF_AATF.1.1	AATF_RAT	brown	-0.0781806583727337	-0.0327655738353675	0.282555634834737	0.0563221564515589	-0.0148944835104833	-0.0817263604515729	0.153069138161963	0.147718455878333	0.13008343484552	0.581696429296931	0.817630121582023	0.0424002342616942	0.691672089493936	0.916534132992346	0.564631510081325	0.278646521593133	0.295992766778098	0.358014092642911	0.208479631408783	-0.287525940205022	-0.554395951225551	-0.238010802637608	-0.209562685159001	0.00449096152877154	0.252005411980169	-0.0224367358391854	0.251571145165262	0.336480817710277	0.646935612170038	0.767381145008556	-0.199521686057097	-0.0277238079490812	0.201222694317102	0.0341753040737343	0.0510192167539475	-0.120716236575099	-0.0724818897307731	-0.109454814230715	0.0154504744104113	0.0151106339271274	-0.159881455940604	-0.450397828733832	-0.625447180178985	-0.320347690913332	0.138028098384392	0.038748789379776
QSF_AATM.1.3	QSF_AATM.1.3	AATM_MOUSE	grey	-0.0148817483181633	0.349517319243628	0.134179132059218	0.270237124004151	0.0444496833818222	0.312834008311136	-0.0255847429135365	0.079744192915344	-0.0757934180508471	0.916605245935328	0.0110916746168975	0.342948068045948	0.0526776286573617	0.75436110521221	0.0239428460112368	0.857122162773769	0.574142589914485	0.593315861204134	-0.165394208622268	0.128617432802045	-0.114528770960069	0.220120937000242	0.00857608988710522	-0.063846343677024	0.474665536716159	0.238567705518038	0.144665807294409	0.0172541388799901	-0.0536220282411946	0.346697882271572	0.118912256816958	-0.0235419129752205	-0.0620937609778521	-0.219079012027996	-0.319605091082452	-0.0433579004914416	-0.130419846258604	-0.0874512268861518	-0.0273434072789154	-0.0261231023985047	-0.099388744215765	-0.382002141826869	0.0580710056443815	0.173350951119686	0.241288171336807	0.363503412820003
QSF_AATM.3.3	QSF_AATM.3.3	AATM_MACFA	lightcyan	0.39936728203062	-0.342054247885754	0.0268066815499504	-0.45465847031941	-0.0868714612529191	-0.400332927590026	-0.0807802406477859	0.318765602461256	-0.250723037217394	0.00335721614139012	0.0130648308792776	0.850374599712886	0.000708953879773383	0.540292767078352	0.00327437054879073	0.569162123840562	0.0212666591068984	0.0730056263590963	0.0675222899604705	-0.00674843746478879	0.111273021829791	-0.429329292253962	0.0963125274432969	0.098786883402197	-0.757509260012848	-0.222987455989722	-0.251698360544869	-0.0338591827623826	0.212508278164449	-0.493736768733626	0.215599617701929	0.175740772291068	0.228707139008262	0.255383488854472	0.438535721884891	0.215485120883598	0.114295823361308	0.0634427074567391	-0.248845291647366	0.197912241331884	0.106352043253958	0.817245902248556	0.340248078910487	-0.432222018112033	0.634347058094553	0.962129698948653
QSF_ABCA1B.1.1	QSF_ABCA1B.1.1	ABCA1_HUMAN	grey	0.0258609025193027	-0.152186911602391	-0.095415780210323	-0.393079568108435	0.218460317991324	0.102002669522844	0.177503142873638	0.0505989502097984	0.0532347724929659	0.855596301753615	0.281459409619178	0.501033322352497	0.00394335829242907	0.119730809465086	0.471801358298811	0.208065423160216	0.721666219111145	0.707797616370367	0.168451466674162	0.218923621811601	0.298258498582163	0.155192335666003	0.224568487509844	0.212756196422108	-0.300752493060133	-0.389050999732107	-0.350133958346559	-0.118450806073143	0.027200590097164	-0.109792227469113	0.101825520448598	0.0361691843135286	-0.324602327040244	-0.0428553689177639	-0.0745554751420456	-0.0378245285046641	-0.0139973032161229	0.00639081549133145	-0.165171783683857	-0.160126116936364	0.0824487172959679	0.206059641937048	-0.107590723539424	0.18343218170375	0.232577626184873	0.118928559748667
QSF_ABCB11.1.1	QSF_ABCB11.1.1	ABCBB_HUMAN	darkgreen	0.0928983534135009	-0.375656713581292	-0.152429414314383	-0.422271284141123	0.265030677470349	-0.193203840141994	0.112774254789786	0.258409575818089	-0.0437078538539011	0.512446038195058	0.00606303912138446	0.280684359675291	0.00181907639312452	0.0575888517597099	0.16996553610944	0.426030833540614	0.0643605688671731	0.758335640383395	0.317592578345874	0.351213925440412	0.435071646065558	0.0264674502976405	0.436764531319634	0.388329067879244	-0.58880919477529	-0.569629336930486	-0.521733627507869	-0.125579675516874	0.00645106829143746	-0.401010449833945	-0.00833978334661047	0.0897383065273624	-0.14035875459358	0.202560621343658	0.167595297865905	-0.02242282610682	-0.0143421782034639	0.149452718342345	-0.220172561827341	0.0584096189701549	-0.0654267463162033	0.4968093653047	-0.0288482027406173	0.082715429901387	0.0217748651855867	0.0106807717110062
QSF_ABCB5.1.1	QSF_ABCB5.1.1	MDR1_CRIGR	grey	0.313023764348747	-0.330011265198079	0.0203626524165905	-0.172210999780777	-0.0766773187762728	-0.276152143386863	-0.0607434923946028	0.290683121228543	-0.1743519203812	0.0238530454765426	0.016882576673925	0.886067082895636	0.22216603126729	0.589001635133703	0.0475157345621473	0.668814985173625	0.03656688077595	0.216383828939538	0.0388816459919842	0.00259150045651445	-0.0801848834399901	-0.252157405809681	0.121901670116635	0.0223667465508768	-0.348019591470077	-0.0733527273503557	-0.0661443553873803	0.104461163211204	0.206955925850856	-0.15566319797115	0.118627467091172	0.161241045055132	0.30406255954426	0.116068123237142	0.324322447797223	0.0717014226204612	0.0653877780457762	-0.113414913517688	-0.258043863306582	-0.0909002925952485	-0.00738083242782534	0.292411713347309	-0.0836297874270016	-0.241930499746346	0.784340344171044	0.985452723527172
QSF_ABCB6.1.1	QSF_ABCB6.1.1	ABCB6_XENTR	grey	0.0594583939207276	-0.164499135410908	0.108845407480783	-0.0454521357264096	-0.121699552391122	0.171332193905479	0.167047618050404	-0.139687049040201	0.0301058670941906	0.675429094617773	0.243879954412038	0.442426832669555	0.74900024249028	0.390089195833788	0.224570289134556	0.236550132193086	0.323317050309246	0.832210755436351	0.114189887093049	0.344382405832497	0.35007986246568	0.272361874002898	0.307917724871358	0.428698759913536	-0.15643751342355	-0.38592013347077	-0.1808568159337	-0.522327809921082	-0.104520477928661	-0.115490977917897	-0.133467314108359	0.178393941293338	0.143563448437392	0.0538441568530527	-0.14421415857715	-0.279052979907647	-0.123624589991937	0.0174859182000377	-0.160984898415516	-0.167375120488732	-0.111667334583566	0.0992701665280994	-0.0663259762142523	0.300697087044482	0.420208440256079	0.0124193002647006
QSF_ABCB8.1.1	QSF_ABCB8.1.1	ABCB8_DANRE	brown	-0.00763259429287941	-0.303058974494482	0.104872008187277	-0.349845779803473	-0.0124982281035914	-0.385173645219786	0.109647569432115	0.236288569012622	-0.0716905451721786	0.957172419053099	0.0289689754897889	0.459358742669832	0.011011078368928	0.929925547346	0.00480693359284421	0.43905108420606	0.0917082122328623	0.613522623632008	0.304507902339092	0.0027539207819626	-0.277810528976035	-0.397516370615678	0.221014847527993	0.279005637630074	-0.451366158427484	-0.376806802891495	0.181419108694963	0.19108402162918	0.679879765305114	0.208642220222868	-0.0524218248815798	-0.0351743894955716	0.031995959375391	0.344834518971038	0.19878846157049	0.0465540600942712	0.0754905680598267	0.0238550606300068	-0.25236930770581	-0.181238280014428	-0.0608893599559996	0.111547270943694	-0.540942205861913	-0.454166910568368	0.0281726267037659	0.984541091376349
QSF_ABCB9.1.2	QSF_ABCB9.1.2	ABCB9_MOUSE	grey	-0.133518145455515	0.110253738398227	0.113946657175752	0.0616347262027843	0.0500787465331424	0.210760810743912	0.326352132702739	-0.18350425926238	0.0365111392073236	0.345352537907066	0.43650968168092	0.421205589536514	0.664242561183258	0.724413995420619	0.1336724275901	0.0182158369222128	0.192851264879055	0.797201158559302	0.2524981281683	0.131616623181202	0.0176454215703781	0.338661763632679	0.155317658793316	0.318703481616416	0.374940102698681	-0.206293600829734	0.165350337916809	-0.195618501847121	0.0659028311123141	0.462599349804117	-0.1849218161383	-0.0391515943346164	0.0378393429361796	-0.196222817191688	-0.385028934784892	-0.264401329242063	-0.0499013264748046	-0.172399139844264	-0.293370816122758	-0.236255398237204	-0.283334229817995	-0.446775680904233	-0.298434450193298	0.290574631758353	0.0709316430842677	0.352327626808294
QSF_ABCB9.2.2	QSF_ABCB9.2.2	ABCB9_MOUSE	grey	-0.131838572098772	0.0066739498190859	0.125047267306588	-0.123991888186379	0.0376940326253435	-0.0208764827074624	0.0758577257943744	0.0838450644379006	0.0132213598762484	0.351509055625303	0.962547402831435	0.377083605866135	0.381155392312223	0.790776650003748	0.883211855304958	0.593001509039088	0.554547315781668	0.925882145743697	0.204920018360096	0.207030314619251	0.0266890529395567	0.155397830540621	0.457770642235015	0.521158252688501	0.00668671688518248	-0.45491580086743	-0.0468900651825511	0.00322998058223932	0.181615579089191	0.245522624909681	-0.114979852784726	-0.119101330417889	-0.141858387872465	0.208034459182903	-0.144980613248691	-0.145745792244531	-0.0511751114583896	-0.155337767192103	-0.243167412332421	-0.241699196963658	-0.197849285488559	-0.215975879328663	-0.518514394362293	0.165634043317722	0.145035416422943	0.140849985630764
QSF_ABCBA.1.1	QSF_ABCBA.1.1	ABCBA_HUMAN	grey	0.163117490910262	-0.277151039891822	-0.189408471480284	-0.129720119735597	-0.107685718774493	-0.146235133327899	-0.121752855195578	0.198243971063967	0.0942268791787068	0.24791776295121	0.0466861608567411	0.17867312599185	0.359369758103468	0.447332517909844	0.300922924556546	0.389880070439694	0.158884499641787	0.506406858755241	-0.0335182114275396	-0.25992775897058	-0.399828921444692	-0.41856523904259	-0.20772281368086	0.0402722676761077	-0.0556799158451653	0.133925661158637	0.101214503613366	-0.00702541934883878	0.414794798325923	0.302034768757459	0.134958915952466	-0.120629334551537	0.22091806820327	0.0402285016307232	0.372325483701765	0.137240645160959	0.0616375272950771	-0.0822409750249706	-0.032489769216637	0.0950826697739618	0.0565538653280375	-0.0153200929251833	-0.25334751578059	-0.424276104943396	0.813514984176433	0.0627541423087277
QSF_ABCC4.1.2	QSF_ABCC4.1.2	MRP4_HUMAN	grey	0.0513136163049186	0.150384237466044	0.488965285892765	0.233254819091798	-0.28064001220451	0.119539864824547	0.0247186832636077	0.0533635604851279	0.0288517007478738	0.717896947920962	0.287264950846237	0.000234905828535815	0.0960765111561717	0.0438808404587843	0.398617898363153	0.861910724595984	0.70712234693014	0.839105941599416	-0.284924182899083	-0.0764701477067444	-0.348987223423698	-0.144669780312852	-0.231809652054149	-0.113067507034233	0.18412351366893	0.150723294045442	0.278546996978526	0.249282274790076	0.286551144634783	0.338889416948519	0.103445220071601	-0.0691059948215181	-0.0156573966417635	0.28812373322955	0.0326228110192877	-0.0324882967104497	-0.248945589948904	-0.243100961272167	0.0495188277485347	-0.0660350240902751	-0.0888363578694641	-0.265016651401971	-0.215523064158043	-0.208933525894825	0.0406264569489525	0.590011554956756
QSF_ABCC4.2.2	QSF_ABCC4.2.2	MRP4_HUMAN	grey	-0.390191614260195	0.262203908492373	0.22764016771676	0.216288053141638	-0.178300736163087	0.147879792525671	-0.0412723633167776	-0.134549348616792	0.109417895897504	0.00424151909831751	0.0604060773329285	0.104585039372758	0.12354717699128	0.205996131218976	0.295459707471973	0.771427475877972	0.341605875732133	0.440016153644682	0.038346819010429	-0.0500410895673468	-0.362297097941808	-0.181033811195776	-0.204666606557416	-0.222841967944472	0.12452468583257	0.372168585160066	0.497810428887759	-0.00729321480859456	0.201580706159732	0.236844689390082	-0.062275652880778	-0.122285283503076	0.208126625126807	0.23478493521116	-0.137447846515909	-0.116287758795475	-0.170705558965247	-0.229003439048883	0.199040940492227	-0.0381618726149296	0.00824041153327771	-0.194679698118033	-0.139199992063165	-0.221023703025469	0.787237112788357	0.724613038057323
QSF_ABCC5.1.1	QSF_ABCC5.1.1	MRP5_HUMAN	grey	0.0275571646547596	0.331566862570359	0.272860852064856	0.544165793916904	-0.0955557207353259	0.353455914092145	0.0693305223562975	-0.125189706615058	0.10048782299226	0.846235649708923	0.0163414536879625	0.0503345197194114	3.04814576856091e-05	0.500402759000597	0.0101579561211312	0.625277449805914	0.376536056103044	0.478442263042977	-0.339319846101615	-0.347774114922689	-0.488777818736111	-0.0221718293527911	-0.228983339155931	-0.267111253890065	0.585061054054192	0.308551428628275	0.473181737379311	0.205807815260015	0.125807207682277	0.514779367026462	-0.0243750939148989	-0.0795717999416424	0.0988886935581973	-0.0495774516248118	-0.279242493636047	-0.156337818156863	-0.255378309376864	-0.165311872405289	0.198901712917345	-0.112306931096384	0.0367096177874026	-0.601753596651621	-0.205776632731712	-0.0612867162515483	0.0138595425874682	0.0115279711542691
QSF_ABCC9.1.1	QSF_ABCC9.1.1	ABCC9_HUMAN	yellow	0.13209525512467	0.183693019170866	0.191456491571311	0.0614049079260938	-0.0828608657765539	0.0321241545936703	0.133487845152414	0.254004503284059	-0.0918514598067136	0.350563839395397	0.192385936259629	0.173935301679792	0.665420480017302	0.559221078648368	0.821141014293867	0.345463010466988	0.0692086059026873	0.517230496077438	-0.576561569925486	-0.177057811455097	-0.345775216050407	-0.345559426725664	-0.0391197366419382	-0.183978415071047	-0.00660789512274552	0.386488586881512	0.183918150333293	0.19881852442474	0.171633519939777	-0.00281959148772891	0.282021692329353	-0.146611049827125	0.00232285830106529	-0.0266459520890635	0.133872510588863	0.420611890124552	0.230412039434452	-0.0935693014067693	0.0141468675381958	-0.0693960385303168	0.216248910548092	0.0375432538279877	0.0880452904251656	-0.306636253484855	7.70057886309262e-06	0.209227136685669
QSF_ABCD1.1.1	QSF_ABCD1.1.1	ABCD1_MOUSE	grey	0.262774979586838	-0.0543692728958363	0.0897268678438109	-0.126858598032322	-0.236130844238848	-0.170945506953912	0.0102689014019321	0.189079838351762	-0.170742297853388	0.0598281828385317	0.701856850257934	0.527008649795277	0.370156176680257	0.0919314380946379	0.225633886941197	0.942401462016055	0.17944195875191	0.226194217155836	-0.169238990899102	0.151274139823205	-0.0894772780271776	-0.348526571952568	0.0436941526652129	-0.131395507293584	-0.360722355414296	0.0459233938079564	0.19413513624059	0.144823062945079	0.18156336345187	-0.296405338979325	0.122474425630511	-0.160030233019075	0.120176161882147	0.0741168015890359	0.273415949761374	0.145661611707299	0.1056221433808	0.00125091204939711	-0.209750063435852	-0.026806015538809	0.143838564223151	0.338260256216076	0.187373380298697	-0.35018235892755	0.23036935854674	0.284389285327258
QSF_ABCD2.1.2	QSF_ABCD2.1.2	ABCD2_HUMAN	lightcyan	-0.149490623366917	0.289465311142907	0.270353395695901	0.538118463127236	-0.0371535381577208	0.397144628261337	0.0435782568255006	-0.159493441907347	0.0735524008742677	0.290171691500907	0.0373961610211251	0.0525719537102327	3.88015620685123e-05	0.793710491176864	0.00355497145463224	0.759030627651271	0.258723571359498	0.604316389579	-0.0745844574462273	0.174921538872974	-0.19990940973644	0.473000472694086	-0.00229829168659684	-0.00836911524636336	0.850824480096087	0.242843440937818	0.308059073234256	0.165846147453232	-0.0393945837328518	0.666125140554536	-0.304284618353792	-0.0983024870427074	0.0297658037991958	-0.1536593857229	-0.488961532718002	-0.248162541769745	-0.146162757654126	-0.226526871333531	0.0227587342187909	-0.304911042579222	-0.28260723381267	-0.907487412480957	-0.44023731300704	0.408096846237191	0.599239277065292	0.214863256531977
QSF_ABCD2.2.2	QSF_ABCD2.2.2	ABCD2_HUMAN	grey	0.196749015534857	-0.10856122169041	0.0609545809822566	-0.200486591680419	-0.0794097565840295	-0.293655826616473	-0.101889313618088	0.145016524155942	-0.234049152698825	0.162114423618491	0.443626219730818	0.667730922653065	0.154128135872127	0.575754546064972	0.034606214816665	0.472296585214373	0.305012704539361	0.0949174498768477	-0.0180990902629709	0.0860641103283647	-0.0343024165321028	-0.378644439331637	0.083171534624507	-0.000351682735047857	-0.450564228247145	-0.108227086959634	0.0691892032877287	0.0162955546794978	0.154249314311968	-0.342414321473166	0.0549698903931526	-0.129027181912362	0.160644859157068	0.0859141639599807	0.317957720739585	0.138713017848298	0.111691879607657	0.0578042537618747	-0.258926792724139	0.0828473360276309	0.132172385722389	0.45916840332276	0.200541650576039	-0.378000607108141	0.898661739910056	0.544078003424938
QSF_ABCD3.1.2	QSF_ABCD3.1.2	ABCD3_MOUSE	grey	0.0175058584322438	-0.00206908183939998	0.188804100782495	0.097742402456095	-0.0992548443637024	0.124016049490815	0.0106530709133746	0.0927330718989885	-0.0153960355341747	0.901966759163469	0.988385071760962	0.180088880579161	0.490602962677545	0.483883830165405	0.381061883247877	0.940250484742928	0.513199908803245	0.913734001661914	0.0150627365377477	0.365299929175498	-0.112581476196299	0.162166337446412	0.0837711626368458	0.0972001537696814	0.254059161012011	0.0653379752135756	0.0719835233170072	0.359496564405276	0.195582435405994	0.301089197325486	-0.210090348513139	-0.181747015240416	-0.0262416510545791	0.0609403247557824	-0.093190162601049	-0.117913528297503	0.0613926565321338	-0.167936150614353	-0.111182538655462	-0.228956465442516	-0.207960284389929	-0.374310230570856	-0.385530981759117	0.0796260486497541	0.915594673995898	0.00774706646947181
QSF_ABCD3.2.2	QSF_ABCD3.2.2	ABCD3_MOUSE	grey	4.63830852143049e-05	-0.233372587170652	-0.0492866772297742	-0.425394134652503	-0.116134206070412	-0.202535627292617	0.260198307285141	0.0938996466496094	0.202777366180431	0.999739616559436	0.0959039784082903	0.728604406431164	0.00166769232744282	0.412285957031623	0.149874827264522	0.0624712724815768	0.507891007768802	0.149378818002544	-0.0214022123346136	-0.00695651447310911	-0.136297046918832	-0.312004478342868	-0.0130558463898221	0.211425647835815	-0.361725096529565	0.063400937515964	0.138740705783601	0.193512209128889	0.381358490123611	0.0306959716059326	0.198171376783231	-0.198507511010243	0.140223937314094	0.304244038797426	0.102891888161047	0.191794342330092	0.00568268863004609	-0.183402706615539	-0.242447564942089	0.135247499927332	0.0898876174850792	0.248095540929666	-0.0814895751848304	-0.340843943036401	0.880292028208485	0.960962920625698
QSF_ABCE1.1.1	QSF_ABCE1.1.1	RLI1_SCHPO	brown	0.0490243087903873	-0.110457991007316	0.252470643390067	-0.1140904141629	-0.0803994378591497	-0.406851227989762	0.0831270308234968	0.374778032755759	-0.144011594795464	0.729994198829053	0.43565519441489	0.0709633948669097	0.42061607846836	0.570990384241478	0.00276084507188146	0.557955286857433	0.00619230891792144	0.308412129501184	0.0557655920472008	-0.326665008868168	-0.720945007041883	-0.68983456386625	-0.107471496230787	-0.103650332746963	-0.220172360534927	0.00283096310785501	0.225777015680514	0.643294819120147	0.900685889999894	0.450996043675992	0.0893230301270372	-0.0244331145200304	0.234297083170309	0.242932314055634	0.358304924601542	0.111170099449829	0.0962842408839319	-0.0901485823496317	-0.0948791147817415	-0.00865411675468456	-0.0389039854879563	-0.0328394489566212	-0.52896443480246	-0.765764386783158	0.694569295872865	0.0180984450978886
QSF_ABCF1.1.8	QSF_ABCF1.1.8	.	grey	0.237574389483307	-0.20219751924356	0.0514641060357157	-0.129017986839042	-0.0917342239637417	-0.146864013000357	-0.00863809510695132	0.308051606333712	-0.249024761162596	0.0899041270810759	0.150570612328862	0.717104083770886	0.361998527931845	0.517767673874861	0.298826261791637	0.951536750730679	0.0263017291201695	0.0750346119325885	-0.17453788873561	-0.196935953688397	-0.330723131978052	-0.380243368397793	-0.265643146038267	-0.10735198775682	-0.142636430696872	0.156959402846659	0.289716902211825	0.0806569752436882	0.403427448212407	0.161593754011085	0.0897500452020282	-0.0428641123502481	0.155228956541124	0.0492886474440682	0.2582416382857	0.406528088037444	0.354829105237942	0.00368766736545539	0.0356113586529387	-0.0340225840494338	-0.0748201194850988	0.0408671814739675	-0.136048319329514	-0.415413525481025	0.215886570864254	0.161707926845943
QSF_ABCF1.3.8	QSF_ABCF1.3.8	ABCF1_HUMAN	brown	-0.0905818798860274	0.0468437904189206	0.272494444228641	0.0351564508993333	-0.067970764338093	-0.0111764136712223	0.0519347551248793	0.251396019352202	-0.146769923134223	0.523062598864353	0.74157752878602	0.0506565578191191	0.804575091154209	0.63209259312271	0.93732095489453	0.714626351415098	0.072213736564171	0.299139351115828	-0.0951370465595924	-0.214383121666102	-0.628900814668482	-0.370241308644335	-0.0514229088222721	-0.105226306412494	0.128887151753004	0.0336464838787332	0.150215226340709	0.321807462868631	0.707468634683278	0.674076739992355	0.0959267234303342	-0.0194552641105028	0.0471112828966598	-0.186497423126382	0.106497802413944	0.103126231080621	-0.0610492353850056	-0.0149340059132665	-0.155552905611244	-0.197212739864554	-0.15980047049862	-0.385410978443877	-0.663687613659969	-0.403857893066433	0.502290494216509	0.126969029546468
QSF_ABCF1.4.8	QSF_ABCF1.4.8	.	grey	-0.254731995257254	0.210115263030658	0.0952356741104653	0.248652238452641	-0.111339140681779	0.380777268330082	0.213117095911882	-0.357164137619315	0.123991462615241	0.0683885004337665	0.134894433337027	0.501845469693819	0.0754855917848588	0.431979661345773	0.00535557729765473	0.129282453112511	0.00934166243933095	0.381157039479759	-0.0361913495993845	0.140788123533179	0.105622246415039	0.299316170356786	-0.123412383627147	-0.177602257437008	0.326346109770688	0.254046670796769	-0.0167816642671404	0.0172167040389929	-0.127850231343027	0.14462983235229	-0.0649900952524656	0.0227110178523217	-0.129581429932522	-0.263240280309284	-0.268947296511278	-0.277756250724964	-0.366839492135601	0.120319259590245	0.0090596785384942	-0.185565845656418	-0.349344016794213	-0.330006644153891	-0.0164712459675012	0.286620027932329	0.798940303245927	0.319479609011855
QSF_ABCF1.7.8	QSF_ABCF1.7.8	ABCF1_PANTR	grey	0.0192579609824495	-0.0954937117278109	0.0252509694513706	-0.184609230850041	-0.175281877448781	-0.290542423051092	-0.190424433720964	0.184404570868467	-0.0536900033255908	0.892210391943354	0.500682117393658	0.858967047626129	0.190138670443734	0.213905213026413	0.0366619075607714	0.176311328134213	0.190639022792872	0.705411722622188	0.101959632998159	-0.242481144490649	-0.207588650152192	-0.490822288398285	-0.144616889832195	-0.290686629402384	-0.409171869255335	0.0604992343156669	-0.0679521186663614	0.0281819904329854	0.338237852150804	-0.0624185209969067	0.195501148641376	0.273122724758642	0.0581031055504793	0.0432054838032348	0.417535107554698	0.104446114856982	-0.0175772117864748	0.159279510508833	-0.097832422389374	0.0593906664103546	0.0209065219485808	0.382234285001181	0.103222488497519	-0.477521072275492	0.47198934268248	0.0832729968178192
QSF_ABCF2.1.5	QSF_ABCF2.1.5	ABCF2_MOUSE	brown	0.0538520411968532	-0.276069347533905	-0.0327579745043299	-0.235396629806029	0.172158662654889	-0.46254721991806	-0.172873734324591	0.200180614077302	0.045398674904345	0.704563147802177	0.0475850315302533	0.817671696907695	0.0929761381340213	0.222308713881528	0.000555526034408767	0.2203647689868	0.154770827906563	0.749285843333216	0.0504349835167166	-0.480057533033187	-0.537650435745893	-0.766682576923336	-0.169818827583558	-0.0395011558361055	-0.405553522090301	-0.0944914497378366	-0.0607277094173405	0.0959182566950942	0.700737411182256	0.213770657046582	0.0860367512922729	0.0425574326737627	0.273025827258373	-0.0432335243872567	0.431821819452186	0.134662655010961	0.10690967085724	0.0731371249316275	-0.108721851902072	0.217193369152378	0.0466443507548116	0.27315867379128	-0.271655343580989	-0.774091757657862	0.722531936343641	0.000316463341591064
QSF_ABCF2.2.5	QSF_ABCF2.2.5	ABCF2_MOUSE	brown	-0.0196588199908496	-0.0208694870639549	0.357657172449838	-0.0321489229536288	-0.0512800846875883	-0.276368656222319	-0.0232787916910853	0.252518017873137	-0.00404058316793771	0.88998042705984	0.883250718569491	0.00923752490269781	0.821005376434728	0.718073651429645	0.0473349103291473	0.869882902598334	0.0709086725527904	0.977320103644557	-0.0413893726616422	-0.384622563070087	-0.755410898826048	-0.650215166632826	-0.201436200298101	-0.114775284624253	-0.062986975297117	0.071804746836268	0.270437622328779	0.365888215282347	0.835464113843367	0.56790910781465	-0.021687204307746	-0.12850525348799	0.314497373476576	0.0352784676966326	0.284569729172366	0.12957667542741	0.114429247949244	-0.0269668119321233	-0.0190943310907768	0.0311814555524534	-0.0726039701666811	-0.115322813857747	-0.447478449472593	-0.717151272604218	0.770797021100676	0.00487288582813883
QSF_ABCF2.3.5	QSF_ABCF2.3.5	ABCF2_HUMAN	brown	-0.252383182117755	-0.00738511886249952	0.121660925138026	-0.212190132067707	0.021011135598833	-0.286231024845697	-0.119575186093592	0.227789939502205	-0.00767617418360026	0.0710645096685945	0.958559807492779	0.390240785259252	0.130996331266694	0.882463864268183	0.0396741819351581	0.398477543450863	0.104350785172856	0.956928115845027	0.17166021485	-0.36799045485105	-0.625347380540934	-0.654381791233677	-0.171499889950786	-0.0977988330113555	-0.194978500671125	0.0524681745850456	0.243045255351745	0.0955264770970912	0.682760435965234	0.364063290256901	-0.02474861145614	-0.167174896400281	0.313592625672239	0.0118644856609095	0.269436342087111	0.108467240037244	-0.0558612792845686	-0.209940876788367	-0.052023270417494	0.0796995983505652	0.0179061570365099	0.0332452234814527	-0.339342452339556	-0.667900380743329	0.223670781888858	0.00727456420307951
QSF_ABCF2.4.5	QSF_ABCF2.4.5	ABCF2_MOUSE	brown	-0.0455780706631482	-0.145891765927656	0.256123636362078	-0.168979675564255	-0.0678379414022577	-0.417343005956779	-0.116879271260744	0.29577308903551	-0.0429772270141599	0.748327599111529	0.302071700028676	0.0668412868391648	0.231094893191047	0.632759944985183	0.00208296274829115	0.409272964958897	0.0332635169090064	0.762256217459817	0.148210404014332	-0.490322716604938	-0.705557109590128	-0.741438185273109	-0.265452779474979	-0.105116394597395	-0.210623324425283	0.0690316904982217	0.264380082797203	0.326152353657011	0.799891914893052	0.412658937712388	-0.124769236475981	-0.132366805777082	0.32169093580618	0.0870197980835394	0.355269786763584	0.112777664258473	0.138141695436639	-0.133330183353409	0.073954493167064	0.111085167687957	-0.000631027206353996	0.0396848124353415	-0.372144885732656	-0.793211033282592	0.294369309610936	0.000224314827214373
QSF_ABCF2.5.5	QSF_ABCF2.5.5	ABCF2_HUMAN	brown	0.0290960902689103	-0.242556329998299	0.146834512002147	-0.253599325571894	0.0314538554448807	-0.496918132422495	-0.164166114486603	0.352540234699972	-0.0554410392874356	0.837761374235313	0.0831744632816071	0.298924405189856	0.0696687491286714	0.824813700047263	0.000178776185052757	0.244849074560908	0.0103687547749224	0.696260763723034	0.13939899949044	-0.49830206430307	-0.659927946769277	-0.806869117950353	-0.176764926294608	0.0319614860996348	-0.363724975916018	-0.0462252574200626	0.140462897021395	0.107228618972996	0.780179210369746	0.301136450118687	0.109803335940569	0.0280738339897658	0.299411639221431	0.0695309214696265	0.42888571007335	0.121306755780499	0.122990311580585	-0.01378322792157	-0.0640856564104941	0.0751111993429839	-0.048285457642292	0.190039380967573	-0.353631738252368	-0.823927032550096	0.324325741460414	0.00017036317172348
QSF_ABCF3.1.1	QSF_ABCF3.1.1	ABCF3_MOUSE	brown	0.0222781333805689	-0.12162760381318	0.2221171781997	-0.196577442252891	-0.068890548963435	-0.28001857250981	0.0639940836144742	0.38884168199132	-0.109035111956526	0.875430809873569	0.3903715799004	0.113509349283109	0.16248816711082	0.62747924745664	0.0443701525875318	0.652196740798696	0.00438756222120796	0.441627199794429	-0.0410826384632786	-0.448315827782985	-0.791117448727834	-0.735397438394549	-0.211306572484308	-0.14940657595229	-0.157991652134498	0.116594123626144	0.207940524059648	0.43085593155177	0.923883501263271	0.566651097310737	0.129665716127882	-0.0941517029810921	0.282826689116904	0.0176626104753815	0.406956653812608	0.272600340878201	0.121024634112726	-0.0404671616756615	-0.0699581192586469	0.00151614810484977	-0.035014353231078	-0.0637391404464243	-0.51381305007599	-0.784213583467074	0.772450038042583	0.00085892127343306
QSF_ABCG2.1.4	QSF_ABCG2.1.4	.	grey	-0.154763606561767	0.084834876031192	-0.18201959989654	-0.025301002611634	0.0262374384157784	0.0584763763155303	0.0145978706738733	0.0159930668622556	-0.00359589134864889	0.273296068696427	0.549865664474603	0.196539205926996	0.858690448694159	0.853516677221421	0.680499778675326	0.918190577391208	0.910402171655746	0.979815621870277	-0.0720039858154085	-0.0992253644196065	-0.124466285648549	0.0302809918565061	-0.13459835399091	-0.0367611609801523	0.220432928408083	0.147125907610185	0.289587848175135	-0.00338925464763731	-0.0108056436345225	0.189121993760797	-0.0904661169429232	-0.37763586210892	-0.0818074593208486	-0.263337709449667	-0.212692702298758	0.234272240663511	0.316665042882958	-0.225650687661936	-0.0811447766776907	0.0151553560751357	0.114445908686518	-0.209991721749364	-0.0116347084360873	0.0108405554872518	0.611968571982996	0.484014332700935
QSF_ABCG8.1.1	QSF_ABCG8.1.1	ABCG8_MOUSE	grey	0.0171953672180478	0.135437568283497	-0.0751574932734026	0.222125520826779	0.107942733994288	0.233175404381827	0.0769217526652956	0.0573946864208191	0.053121414141553	0.903697231643829	0.338399015548891	0.596428394405046	0.113495443835929	0.446242719633654	0.096192991299206	0.587811061973189	0.686101371089675	0.708392168581799	0.133347389495648	0.314840877802996	0.148454648123359	0.495803403960673	0.146544790499335	0.260486544831332	0.488117539726041	-0.0772830691263529	0.119577295496979	-0.0908817315961746	-0.155574374547367	0.315785770675154	-0.165673647146645	-0.14505613865968	-0.0978318011119291	-0.139709360949862	-0.431397591085461	-0.107446246305767	0.18821779726271	-0.116364822242001	-0.109696193290963	-0.143249636996179	-0.152404163706099	-0.46774238710022	-0.127883918312586	0.425736057222662	0.345975386158384	0.0230073625993591
QSF_ABD12.1.3	QSF_ABD12.1.3	ABD12_DANRE	grey	0.158597898785263	0.0414696925625745	0.135569432434764	-0.0296770406549427	-0.239569883284564	-0.216756209579556	-0.092590800434539	0.283290411678484	-0.260331515091445	0.261441833984903	0.770364336631994	0.33792453143855	0.834566987018739	0.0871593167751	0.122717007201814	0.513849275781565	0.0418433001801663	0.0623323741614492	-0.118802663893943	0.014440803313706	-0.197552920085308	-0.248987960363202	-0.204281655061058	0.0222944390875476	-0.143842190647251	0.182158675827639	0.166326123329232	0.136584732424111	0.288864474781149	0.0622185950258487	0.261604843218394	-0.00467917198957512	0.287329632230171	0.16452082823656	0.135337798532248	0.396546889266064	0.311210629873486	-0.00634030993949312	0.0226295743300914	0.0119871926926717	0.0966584935697852	0.211956616149695	0.173157887928662	-0.334903277611383	0.401553871327887	0.919067865269927
QSF_ABD12.2.3	QSF_ABD12.2.3	ABD12_DANRE	darkgreen	-0.31785157073746	0.423036806797927	0.150760989349126	0.492776376447611	-0.0703744370459133	0.218172284994939	-0.0570762031917408	-0.0572671237899013	0.139853163819749	0.0216617855474848	0.0017808760124881	0.286045185829525	0.000206266622565082	0.620066276294641	0.120231630690074	0.687753862809242	0.686763072236452	0.322736252414008	-0.118944161427457	-0.013280895381599	-0.292593203974804	0.17768868820905	-0.259747049580034	-0.0692556300064706	0.682372698722761	0.523085134924886	0.462910017992579	0.139367984493038	-0.0658618919861825	0.476037100042778	-0.129143888263465	-0.269169550751275	0.154030972348906	-0.048656555207254	-0.412080805486623	-0.0930297592633405	0.00196500650664512	-0.28425000459113	0.137191049295431	0.064364205770831	-0.242804726626364	-0.604235805216439	-0.0473000570074624	0.1029128586635	0.400989370168077	0.925549333415496
QSF_ABD12.3.3	QSF_ABD12.3.3	ABD12_DANRE	grey	0.121943774692164	-0.432045784275184	-0.211449532486322	-0.535089257147184	0.155970383868364	-0.262442801099874	0.118559845285672	-0.00178317117311538	-0.0516689491239664	0.389131569582598	0.00138210989233662	0.132377870379787	4.37120369278075e-05	0.269527354802888	0.0601637869336254	0.402523667630428	0.989989962065063	0.716025330678533	0.470555734457966	0.275475486336209	0.653981624244798	0.174556091810549	0.237983318194933	0.40442335209207	-0.558734501556856	-0.414959530605401	-0.481688440946531	-0.294295093076561	-0.211045809225305	-0.532985868426754	0.06038212891851	0.203455429586818	-0.157486283316135	0.0244170961677326	0.166545262735142	-0.0831360924868216	-0.0570048130989326	0.149643869273322	-0.257429704110201	-0.0103877825543039	-0.0194110877238316	0.577242000144461	0.218763776293204	0.224595594520561	0.000431074233780132	0.0480844885020218
QSF_ABH2A.1.1	QSF_ABH2A.1.1	ABH2A_DANRE	grey	-0.030451974427889	0.0994214675414538	0.187631732386094	0.210252078195899	0.134276065477339	-0.193343267069283	-0.127969966420004	0.254492170278004	-0.0755843488785304	0.830310097119349	0.483146566676879	0.182858193911277	0.134634749138671	0.342596327838914	0.169651635728105	0.365943960102003	0.0686579961163557	0.594338354030947	-0.023255782158878	-0.465497134499865	-0.707489756774544	-0.458600428374754	-0.168364565505366	-0.0689029410810028	0.208556792539743	0.148731265204759	0.404660855291125	0.197101106353319	0.504268819673048	0.598107227465835	0.0938571817456061	0.000277822837598356	0.267265899633141	0.0237729300378478	0.0555673496154771	-0.0567376562123195	-0.0841338895480672	-0.338658321680917	-0.0213229062270074	-0.0294420094482235	0.158999773476751	-0.28044071661495	-0.325984915517482	-0.499004678469553	0.870010404686022	0.000506339917620961
QSF_ABH2B.1.1	QSF_ABH2B.1.1	ABH2B_DANRE	grey	-0.114117357954352	0.293591978452806	0.044744897489478	0.302358144988996	0.0615873252359329	0.346128252847883	0.0279410182027807	-0.217143689672326	0.18802029160145	0.42050564108689	0.0346473922049396	0.752781169187961	0.0293608493016055	0.664485446094577	0.0119533749932245	0.844120260950365	0.122033100218193	0.181936987772827	-0.26155666165952	-0.12074397003312	-0.067909934588585	0.176712835166937	-0.197533927686381	-0.231610066118216	0.473938017775449	0.493865039403685	0.264542672682066	-0.122285525801293	-0.283550346670592	0.140889293140532	-0.110930625024593	-0.309057056765966	-0.0201349219367543	-0.204883391119484	-0.301209828905474	0.136153691766165	0.0795052594116038	-0.220329272143566	0.278025150866696	0.148465089729016	-0.0164726804487142	-0.315840841625956	0.230758954225708	0.189672471544859	0.0610664721498364	0.393849483730368
QSF_ABHD5A.1.1	QSF_ABHD5A.1.1	ABHD5_RAT	grey	-0.252081773377638	0.196747036015148	-0.112924768863975	0.201486878107278	-0.0579098583674968	0.116805824764757	-0.0896137681410367	-0.202529906425972	0.157683074138339	0.0714138488057953	0.162118732078621	0.425409620604126	0.152040802768246	0.683431415652537	0.409569411878323	0.527531728431445	0.149886580297523	0.264238319412335	0.00931744406136601	-0.115756670774696	-0.186544642168204	0.00991026971734329	-0.224770574631848	-0.229586886035943	0.369084204639695	0.219302873475949	0.18480121941947	-0.236770317731074	-0.0904264672867169	0.2382388429651	-0.286499862613487	-0.180565886641172	0.110678097330324	-0.131747926790325	-0.115301061091154	-0.00403047018811201	0.170238234624581	-0.182717776593748	0.0222121406863175	0.190150777683238	-0.195204238566005	-0.25599796023564	0.124261394602052	-0.00102240061989509	0.947730423594743	0.413817538085243
QSF_ABHD6.2.3	QSF_ABHD6.2.3	.	lightcyan	0.251798709264622	-0.283441163365665	-0.0572024227092372	-0.497446609839764	-0.11033975212694	-0.39448380828893	-0.294780908234715	0.269953456632968	-0.255910996229655	0.0717431672962178	0.0417297813600159	0.687098782898424	0.00017551984668031	0.436149730657325	0.00380516672562031	0.0338872433217087	0.0529361656152236	0.0670758727728318	0.158585042031722	-0.0922877107878762	0.113447776274723	-0.329392401667436	-0.0353217109519479	0.186035401015662	-0.547113664876895	-0.0728687050722527	-0.303653505820646	-0.0964066727728258	0.0677342533221442	-0.455162087198467	0.157350680282016	0.0954813721726938	0.130614131286168	0.0761910869409194	0.365563311936634	0.216372806059579	0.190614925134615	0.193909676012397	-0.09978014467388	0.161922407934099	-0.054660611544264	0.646449454443534	0.299350669558633	-0.322181218873847	0.261480997236824	0.515234043070391
QSF_ABHD6.3.3	QSF_ABHD6.3.3	ABHD6_MOUSE	lightcyan	0.329471948237589	-0.214275214457663	0.0803489415072226	-0.264339325004526	-0.0251830074134179	-0.225881333000147	-0.298681912885321	0.169559175344408	-0.300774120433811	0.0170737061082137	0.127164983295344	0.571233024123566	0.0582678886626933	0.859342789870338	0.107366374447494	0.0314895694215091	0.229475687428065	0.0302628793332413	0.0857776493980172	-0.0126590989531773	0.125829142223067	-0.1479106849714	0.122387788606697	0.17729442492141	-0.346508354353262	-0.0665777508904388	-0.222213082857897	-0.0343147632990401	-0.000748358626042227	-0.391498328586004	0.108285498004104	0.0920245803558127	0.018376474092602	0.0286946724315616	0.227394855367879	0.0235027418507771	-0.0121333195956776	0.146099522175051	-0.205557987908178	-0.140992196393477	-0.104385739158827	0.418357942253463	0.181362195700307	-0.141820197232003	0.545424131631975	0.92902588038513
QSF_ABHDA.1.1	QSF_ABHDA.1.1	ABHDA_BOVIN	grey	-0.1059357046758	-0.1445659882174	0.0293849898292409	0.179772241103659	0.135324478490134	-0.0704168924844317	-0.271601015247929	0.00855912552692224	-0.0290144052730893	0.454791827858196	0.306533762073371	0.836172516851288	0.202216556874007	0.338806274473422	0.619854729411593	0.0514488169697594	0.951979280905679	0.838210732852319	0.0304796274489836	-0.246086642653475	-0.358318571866942	-0.130603680254273	-0.03744733428525	0.0280259355783193	0.25839292353063	0.151189927620818	0.145332386671089	-0.171757316196646	0.205675161349647	0.448405949172164	-0.0385857218455655	0.128073987848982	0.110272542115777	-0.0989354430467506	0.0306490678497031	0.0011222257275299	0.0785239365669138	-0.0257546349413442	-0.0273603400974619	-0.125089396550928	0.00955504039474076	-0.309288426772468	-0.293964324964404	-0.135810414633986	0.83015828113459	0.0786500611716744
QSF_ABHDB.1.1	QSF_ABHDB.1.1	ABHDB_DANRE	grey	0.231186628763549	-0.0815551888907195	-0.0143385362281656	-0.222176021060218	-0.166908237850467	0.105794487289539	0.289004861141121	0.15018057652876	-0.0716401426820141	0.0991458728341004	0.565449938638329	0.919639121770874	0.113411298082201	0.236947062666341	0.455396704316712	0.0377137249709446	0.287925734942634	0.613772678739738	-0.100270681894337	0.44689337120745	0.236017480908107	0.156997284924528	0.251818010832699	0.312929384651565	-0.194033009269113	-0.109465151594873	0.0840135500695878	0.0102876071576335	-0.0246196871397004	-0.202453930283077	0.149830983487946	-0.151490896350226	-0.0871401393749031	0.0633657243258171	-0.142260635731055	0.145506243805706	0.194398315503866	0.0564864006700077	-0.261070166061147	-0.254188421874509	0.109945991375983	0.146568558121216	0.0557516268190927	0.12641862864596	0.479398224292158	0.000896239077480734
QSF_ABI1.1.19	QSF_ABI1.1.19	.	grey	-0.0431706479066475	-0.171487458315636	-0.0281463406662733	-0.276898399424372	-0.0097840318950843	0.0140781766947236	0.199976396400376	-0.0313843136181121	-0.0160670807954442	0.761217731709911	0.224144207262566	0.842989190277756	0.0468948514529611	0.945116841429626	0.921093652055532	0.155200874665266	0.82519494624515	0.909989230161163	0.25385465451402	0.282139302621408	0.320024759001502	0.391786271125823	0.308060270672044	0.563457964131652	0.0281438323983074	-0.275629179507126	-0.363539006510637	-0.113147256992847	-0.0234483853601484	0.101371174288889	-0.0503940750111521	0.0107759341753818	-0.138505468609432	-0.292532224517235	-0.402468882787344	-0.184939254316633	-0.00447391428778403	-0.202024263216303	-0.384273767133595	-0.288312848148929	-0.194216265227176	-0.109864031283181	-0.215817004458332	0.390093027956803	0.0693784999746549	0.0427184874746204
QSF_ABI1.10.19	QSF_ABI1.10.19	.	grey	0.299286889943031	-0.0616812249787654	0.106413620918433	0.181447710368728	0.142692736840528	-0.101876158639594	-0.263057231277457	0.0562383530693696	0.0483496061647755	0.0311306865809669	0.664004332361061	0.452748028472367	0.197973073642084	0.31291021664621	0.472354074384438	0.0595442048802762	0.692108051012514	0.733572108793947	-0.128248238244816	-0.381791352864087	-0.215910120184577	-0.230454667791568	-0.114549222566186	-0.351670311367315	0.0763658398591853	0.207398693006777	0.130308951100029	0.0119362826270483	-0.13894631729755	-0.171197249142427	-0.185174341902532	-0.0197073171244269	0.301294219078296	-0.0850833100845182	0.266403124027658	0.147538506926819	0.199159234802282	0.0716183712144812	0.353442321747785	0.163438859623256	0.360910047443393	0.106721444947559	0.254088924615624	-0.188126358242707	0.364893835366955	0.00522438268015954
QSF_ABI1.12.19	QSF_ABI1.12.19	ABI1_RAT	turquoise	0.0999406762763032	0.097019840868663	0.285874229052755	0.173751618312246	-0.0446032958232568	-0.0518328519516264	-0.156813461462965	0.233172307656771	-0.194021122112863	0.480853003359307	0.493830073538349	0.0399323321040325	0.217994420823348	0.753538872527242	0.715162574422846	0.266915072713852	0.0961975355852985	0.168131543005596	-0.0844965229225069	-0.249441850896371	-0.506458266331944	-0.319358984223143	-0.211316297313412	-0.232667536459801	0.157386075667503	0.256733699968382	0.618842042495702	0.157013413715037	0.284507025976826	0.33120708110582	0.0859034714165287	0.00961871112550761	0.300759823211277	0.215780049252464	0.188162612413072	0.17015213990993	-0.0226869763147803	-0.14323329507634	0.113654491205387	-0.14589938785512	0.279362418902841	-0.218553920197594	-0.212501165312205	-0.351564583761717	0.551463894513154	0.0745322128657963
QSF_ABI1.7.19	QSF_ABI1.7.19	ABI1_MOUSE	turquoise	0.100080207484799	0.0367907284017389	0.156036196563925	0.128352272881632	-0.0516619949863107	0.0757768416097208	-0.0283069128629483	0.106132140417258	0.0446900309286612	0.480237617142956	0.795681439079478	0.269322823782131	0.364501705237062	0.716061943846343	0.593396902944837	0.842104856420567	0.453951164910901	0.753074730014208	-0.0586762681553156	0.0763259877156917	-0.157971483558942	0.0363893266045095	0.237489368750765	0.1412857111183	0.155321225627533	0.00928221202774109	0.458395755036829	-0.0311107778958954	0.129978461714844	0.271992573252811	0.00452334989559313	-0.168735461281146	0.227332501800236	0.153537270023585	0.0219142057001637	0.223660482154316	0.193593848536877	-0.0362378276638191	-0.197130290013071	-0.295820981142181	0.0301873161436295	-0.261843867603348	-0.324221409507485	0.00129971756656609	0.679466484938472	0.59071476373739
QSF_ABI2.1.1	QSF_ABI2.1.1	ABI2_MOUSE	grey	-0.225477940128797	0.152678864815632	0.157818278565082	0.302562814575003	0.21169745475302	-0.125224605366198	-0.242412353037267	0.0266534672370991	-0.0911073073342187	0.108012215741213	0.27988857190181	0.263823764760723	0.0292459524471303	0.131914174909184	0.376401974684657	0.0833632309899512	0.851220079331756	0.520644964813031	0.0489236309749391	-0.243156567488989	-0.412093244359921	-0.154626943863618	-0.0796367287982788	-0.113279351382037	0.356606007921859	0.109068970984937	0.227914581952901	0.101145830087737	0.139619648169679	0.37320287180374	-0.402378233931093	-0.172059910376767	0.16621134976132	-0.00837378957374713	0.0107259303741793	-0.0689297298827616	0.168681273216884	-0.411265736125072	0.0534271643902762	0.0706044044079735	-0.169635163944707	-0.345168097833413	-0.229420312641707	-0.174521272971223	0.730527728135948	0.0823911089902813
QSF_ABLM3.1.2	QSF_ABLM3.1.2	ABLM3_HUMAN	grey	0.134325707667955	0.259344341008171	0.122317754800061	0.334074807248639	-0.00323182337843077	0.0495949548582506	0.0575760239475135	0.108978153035862	-0.0274789925435867	0.342416278912489	0.0633676253386685	0.387667838237233	0.0155001695215344	0.981858839455818	0.726972533288161	0.685161126922688	0.441867205871282	0.846666582725761	-0.0959595605180894	-0.0933512295839404	-0.17356953513972	0.102875124651793	-0.0824822891264054	-0.11403882254514	0.30578701502872	0.176615150452999	0.197514300760206	0.36865045656908	-0.035647021564417	0.149740101428187	0.1324058290482	-0.103272636968273	-0.0580951891344258	0.0514697233094428	-0.196373946170499	-0.33197660566901	-0.291994365854432	-0.234220902982161	0.151544459412716	-0.0396532680907305	0.137315610573473	-0.2802249031968	-0.0212019067481688	0.0470110755326861	0.498585372561569	0.510383283117498
QSF_ABR.1.2	QSF_ABR.1.2	ABR_BOVIN	turquoise	-0.0790646386765587	0.262058024920499	0.19273285432679	0.20070754511482	-0.258504713600714	0.0987776185067014	-0.00252758832760282	-0.0691293171613689	-0.00531692682673705	0.577420155895179	0.060554421042092	0.171029016447665	0.153665257491289	0.06425894417691	0.485998698638198	0.985811454381648	0.626283957995308	0.970158805151	-0.176712140246553	-0.0188118001906894	-0.311558474755193	-0.102622002108849	-0.274278890652077	-0.202907144099186	0.227148233866707	0.419749496483717	0.805023953132032	0.191634793403804	0.15407683015734	0.234641122476871	-0.169529975665106	-0.321547125463586	0.276385955182014	-0.0350605848529172	-0.13844938090908	0.0749584799092335	0.0613742743027786	-0.158515518772444	0.0904852911579561	-0.233380760283774	0.0408257105466262	-0.28560727668848	-0.0347403295351215	-0.152137375888954	0.210132006574271	0.894693340537739
QSF_ABT1.1.1	QSF_ABT1.1.1	ABT1_PONAB	brown	0.00431921181932587	-0.202842424791326	0.237209454504742	-0.0993432029597889	0.0598999563325418	-0.191999917195112	0.0366472854497575	0.278386618540402	-0.0406073049797895	0.975756605634657	0.14924553587299	0.0904133145519478	0.483492793070899	0.673153700734094	0.17269357656425	0.796461036117446	0.0456764136886161	0.775013627727832	0.175672326066379	-0.382387886469451	-0.60516249667839	-0.454174336609367	-0.0871069016546058	0.0613869366221045	-0.029493333555192	-0.0870377962379742	0.032370510451018	0.203056987116332	0.814030137829719	0.689281681454855	0.0766834802271026	0.167146942170811	0.176588157841649	0.074993730607813	0.207385430141811	0.0925861801605818	-0.00986461711099074	-0.0645695279857373	-0.0659768720517902	-0.0621057421925061	-0.0955780344994211	-0.205738462339048	-0.638173571542421	-0.51725045316246	0.212870492271433	0.00514852984060528
QSF_ACA1_292880.1.1	QSF_ACA1_292880.1.1	.	grey	0.00447160798477717	0.165813598589551	0.0107964284339662	0.265394359767602	-0.143342036859697	0.0070137577040725	-0.0721928482164301	0.0231174833102565	-0.0620352673099521	0.974901486974486	0.240080274110302	0.939447928889759	0.057234216674476	0.310690510538629	0.960641947038747	0.611033000645434	0.870776825213941	0.662191535806917	-0.296941200877212	-0.219120286031368	-0.297192185122709	-0.233762320084047	0.0528822097964699	-0.405980580632666	0.0986570625133875	0.167853051607502	0.359072630914064	0.112461651594397	-0.0355251400488363	-0.0534003989268807	-0.121614575357572	-0.130578471441722	-0.0807371334484334	-0.0647181069759228	0.0214369160335783	-0.0557794159969517	-0.0522989683839389	0.00358067598612767	0.167770059682315	0.110413544485611	0.199631099889438	-0.115313932377061	0.0835198635476223	-0.194467081787404	0.0325414301785569	0.118589256824443
QSF_ACACA.1.3	QSF_ACACA.1.3	ACACA_MOUSE	darkgreen	-0.127658554908485	0.424352203511391	0.0504877413457334	0.623266626122466	0.0700799943552048	0.411147278859852	-0.249710271169956	-0.141302756043622	-0.016730333042861	0.367121310933808	0.00171690300701371	0.722253346016946	8.01495940639838e-07	0.62153426308111	0.00246268273070902	0.0742103030489069	0.317695973777265	0.90628985168351	-0.282614462645109	-0.037793684573568	-0.116213690116144	0.395464232937861	-0.169456125294706	-0.240015680558917	0.847009342373111	0.313486253303265	0.157361458494426	-0.0831323269327399	-0.379707520214718	0.365021163928301	-0.22442867651324	-0.0676656250033361	-0.0711025048702674	-0.384485352353464	-0.338165789288153	-0.0781215864503177	0.0832406232532011	-0.199156102818242	0.222876587395685	-0.136173342642096	-0.0606108503920535	-0.681002319155143	0.00656917902131863	0.392899605789376	0.0423554222189934	0.790236044771617
QSF_ACACA.2.3	QSF_ACACA.2.3	ACACA_MOUSE	darkgreen	-0.226621231203536	0.478637746676834	0.142468782897222	0.589657856252872	0.0212980719575717	0.464040411365617	-0.0128591304993618	-0.183013983090747	-0.0198165851174659	0.106189493706021	0.000331610797104586	0.313678171339115	4.23085867538993e-06	0.880870284886939	0.000530114373817372	0.927907330823701	0.194063632551003	0.889103015508912	-0.326255620488787	0.164403916656065	-0.0773432486775414	0.489271071113673	-0.0739937555250509	-0.0322960476285517	0.81725674869666	0.281118915510753	0.259513706045187	0.00972241286965135	-0.314745941186247	0.409089134955388	-0.226213290915414	-0.141954308793448	-0.0477725646382669	-0.222696412471309	-0.516168030621448	-0.102203069059254	0.0893916545712342	-0.218083429774579	0.256577744319312	-0.209642405179605	0.0315891853963081	-0.735348613298838	-0.115421291162922	0.463982684168262	0.018252178698531	0.244156782268344
QSF_ACACA.3.3	QSF_ACACA.3.3	ACACA_MOUSE	green	0.329398368261113	-0.0147384921698213	-0.0512470820598355	-0.0133269880293303	-0.0825188028380092	0.202877892816901	0.148025115741584	0.0620755133576907	0.214745588643415	0.0170999243730663	0.917405228544068	0.71824758157058	0.92529167733396	0.560849797263788	0.149172911482835	0.294980090796852	0.661985585901255	0.126312476772848	-0.273364467775994	-0.00171479665094594	-0.0594952473003767	-0.0307550005028438	-0.0789030090537245	-0.0997645874495434	0.0440558590425102	0.229823450404368	0.00494067020554842	-0.0122335024262116	-0.0146675398700749	0.00445676816617226	0.800482623108184	0.164493651110191	-0.0685545648457254	0.00421018966975918	0.0724369155968841	0.0627129004207348	-0.305975211881493	-0.0997673271146571	-0.189254975266373	-0.266109631399722	0.00574374061620215	-0.0322330828937212	0.0456080399018764	-0.0232012848041981	0.0498946052428066	0.990373771947223
QSF_ACACB.1.1	QSF_ACACB.1.1	ACACB_HUMAN	lightcyan1	-0.152909111825428	-0.0735670874406755	-0.0362970119420309	-0.152091041790027	0.108437254021477	0.209077277973865	0.355943776025546	-0.232782348486362	0.148032680626589	0.279155367095109	0.604244009129986	0.79836556143013	0.281766202001883	0.444149980527062	0.136876836605648	0.00960380146623505	0.0967711130923646	0.294955137927598	0.227710861500245	0.627707572666871	0.457106542091247	0.587511070138083	0.435509416017323	0.63835948848285	0.103146473944363	-0.287034164445222	-0.0615798199167811	-0.066502973320331	-0.168915376864948	0.0375551017035965	-0.188001646197623	-0.210260679781712	-0.293980483917532	0.0809847232822504	-0.514338691639427	-0.300820227950029	-0.0461478207877589	-0.226708530848068	-0.273015954437714	-0.409720777652648	-0.101862829089004	-0.238871552648194	-0.238389286968858	0.566669536660637	0.104474418643624	6.33870469799231e-07
QSF_ACAD8.1.2	QSF_ACAD8.1.2	ACAD8_HUMAN	grey	0.15982921219583	-0.263833399434159	-0.317041256726611	-0.359238515586478	0.0190217005210408	-0.17907142148439	-0.159561459331839	-0.0697591582401925	-0.0791532454648431	0.257709312950626	0.0587688766156301	0.0220172390668729	0.0089102650228687	0.893525089093786	0.204010460557019	0.258517895389267	0.623135502272048	0.576992311487463	0.274222315891898	0.299549601832407	0.735175700500126	0.275950760004107	0.0669833031483599	0.249173002972903	-0.437267061149134	-0.24039889915784	-0.419727836460793	-0.374886825802991	-0.485246801374473	-0.684571435413679	0.0848000925811091	0.148252138311284	-0.106495537449028	-0.090878869448349	0.0826857226564167	-0.0234684853133109	0.0514656266513558	0.231716682550265	-0.102253029009537	0.126483861587881	0.136872751894618	0.613526320645477	0.534835579836246	0.307773351729193	0.0491524640551193	0.0309759045683112
QSF_ACAD8.2.2	QSF_ACAD8.2.2	ACAD8_HUMAN	darkgreen	-0.1930395316737	0.430228729497259	0.146809747833005	0.469443033790767	-0.00170996565830749	0.3096556007068	-0.0260684446644702	-0.114990307843466	0.145721741882423	0.170335995398952	0.0014554237254154	0.299006806292562	0.000446701872257943	0.990400890065372	0.0254897721878898	0.854449916023373	0.416936531534391	0.302641581250597	-0.0567622936131604	-0.0296086517714154	-0.2160776178929	0.314994839005843	-0.249544349082414	-0.19857882661303	0.783144375161384	0.349091105330159	0.357622434549412	0.0934159345108828	-0.182374586222655	0.482064261782058	-0.193259998759072	-0.320551281836853	-0.00552931130456793	-0.18075706830221	-0.410090990281297	-0.106167124312455	0.0217585513003617	-0.404401319190423	0.10739228156541	0.0045988010800988	-0.15802643025407	-0.647839986676784	0.0105852231564317	0.244015859591512	0.689384039756757	0.834942890620953
QSF_ACAD9.1.1	QSF_ACAD9.1.1	ACAD9_MOUSE	grey	-0.0158605627274798	-0.04753646610607	0.12429443626456	-0.0143486432217081	-0.0842055203003992	-0.313032855616227	-0.224861763743331	0.257861020563486	-0.0401854548191257	0.911141502568137	0.737891606217441	0.379985456422587	0.919582663044553	0.552840230242975	0.0238487502260537	0.10900447869774	0.0649490385169878	0.777290763117795	0.130447878939299	-0.175158118939959	-0.498050133849994	-0.555045448964223	-0.229464180249722	-0.0876618605628035	-0.134846700053652	0.180417818411702	0.220583722774871	0.172513827989471	0.525121593504176	0.227837856635064	-0.023520232998415	-0.148767444639894	0.445235336239511	0.064903460986078	0.262957202721153	0.0626410104809158	0.116574508193205	-0.161552128205108	-0.0794239917438581	0.0899569173925281	-0.201889557104234	0.126038707011216	-0.0377360359423199	-0.627966601444116	0.356657353811744	0.214233916198911
QSF_ACADVL.1.1	QSF_ACADVL.1.1	ACADV_RAT	grey	-0.0275952437701831	0.172042426583188	0.357859160138735	0.293752044209325	-0.0590687651197507	0.373490066183515	0.103281434497642	-0.177641222863159	0.0107124766235962	0.846025750220651	0.222625826713691	0.00919515248799632	0.0345442380794165	0.677439263915366	0.00638613821441764	0.466233988119199	0.207706143700246	0.939917907629391	0.00592686301038051	0.272081657379619	-0.088657297685169	0.345018672602925	-0.029548613165528	0.0936193819606632	0.505161177245166	0.13701089273976	0.228856546626727	0.103847392722223	0.137495367436534	0.537931316988608	-0.138392229747365	-0.0339002033666041	-0.093818833898418	0.00900480704190539	-0.402024909697524	-0.18921349096678	-0.11584149895296	-0.26547028622247	-0.119213362468838	-0.435561970223148	-0.480077262201987	-0.609640231542047	-0.370797055626742	0.246109022197844	0.966737369489189	0.0510213612605294
QSF_ACAP2.1.1	QSF_ACAP2.1.1	ACAP2_HUMAN	grey	-0.107008356714762	-0.13570585339998	-0.0328900605556907	-0.146758838911837	-0.0946065495592509	0.0819782282798767	0.265337824080167	-0.159898643615118	-0.0938996704298427	0.45021169240144	0.337434086964272	0.816949135696684	0.299176248459386	0.504687655811094	0.563428251506676	0.0572892300532227	0.257499916192071	0.507890899834227	0.275079245158769	0.528102049641538	0.43245832234855	0.396156928610143	0.300710550926515	0.382582301162098	-0.129989356346723	-0.365371606684383	-0.0166102772105414	-0.127195568082877	-0.0475851104383787	-0.0307898856029606	-0.442327053020271	-0.0947840974401382	0.0716453404106586	0.145399344901755	-0.208536131262752	-0.125157046243981	0.121284091440344	0.00771864252476021	-0.2044080633555	-0.150809691775982	-0.0713220774959796	0.0166068886105613	-0.159577129240515	0.354190536838433	0.0484201095557895	5.72929689422505e-05
QSF_ACATN.1.1	QSF_ACATN.1.1	ACATN_RAT	brown	0.0417335043692318	-0.0457215161682812	0.233567471578539	0.0532965375121109	-0.0926115025619749	-0.041669109146872	0.192877828743067	0.250190824034125	-0.145775414627414	0.768943666826603	0.747561654558399	0.0956189968967473	0.707473738226496	0.513754759684873	0.769290376450825	0.170701152525382	0.0736367404089414	0.302461607802348	-0.122228679974274	-0.0937276752577819	-0.48692854834051	-0.166586125523526	0.0665947541884847	-0.0383510756255757	0.218295425971116	0.154102866751596	0.11415316825954	0.534846128384108	0.505446004188535	0.515520393835613	0.0360043229555403	-0.0798025454260836	-0.0194103123433492	-0.119969099970624	0.0512565157484734	-0.0237033170095723	-0.0271533361406975	-0.22195885801245	-0.14436864637103	-0.355545517011289	-0.00229047787687244	-0.421798543043198	-0.539866202835723	-0.190231911170494	0.388016175148696	0.508671862813977
QSF_ACB5A.1.5	QSF_ACB5A.1.5	ACB5A_DANRE	lightcyan1	-0.0311465813318425	0.131115251950839	-0.0248669578285917	0.217561542948903	-0.194846598882139	0.535636950082599	0.145341392661576	-0.284827341925837	-0.0386022656303684	0.826498557286718	0.354181039015051	0.861090540179065	0.12129882562455	0.166293826480676	4.27839421991117e-05	0.303918932365078	0.0406977646010915	0.785853185587165	-0.11918970585723	0.649559439171842	0.622787525842384	0.776224421230655	0.335859068309703	0.282064341566902	0.31388346674176	-0.0927187552579475	-0.171011455629548	-0.243988389850338	-0.581278592822323	-0.163731487373033	-0.174320515675977	0.0280086595560089	-0.148172912292716	0.0186655617039009	-0.46619551454276	-0.154117155973451	-0.0460772310614665	-0.120954786960934	-0.0249560274399115	-0.302105761932588	-0.116959092668474	-0.244860916154529	0.132766825911958	0.791344592928195	0.400010873823447	1.88984688274751e-07
QSF_ACB5A.2.5	QSF_ACB5A.2.5	ACB5A_DANRE	lightcyan1	-0.169078401565165	0.0460956699931752	-0.0257734056508014	-0.0405139285416014	-0.243377689724929	0.342992324486716	0.115176739747847	-0.28780287846545	-0.0789994403212376	0.230818483794371	0.745564953780167	0.856079690664625	0.775517510210273	0.0821039942714087	0.012801349855319	0.416176544325641	0.038553205533177	0.577735063438958	0.0410310146299505	0.488200267938524	0.523345742933947	0.568902987199683	0.217786962614276	0.344984822321944	0.14021472246631	-0.0591070787075211	-0.271627657666916	-0.343657075072932	-0.390987369560432	-0.149996943642639	-0.224786776986114	0.0165121106393845	-0.092513101801406	-0.1153775996848	-0.468261236088907	-0.109714936794552	0.144965337996529	-0.145950680106004	-0.138964447828035	-0.216447167333158	-0.244828354555135	-0.0672363869356205	0.146434817853763	0.57863099191095	0.772728341998314	0.000241073120057424
QSF_ACB5A.5.5	QSF_ACB5A.5.5	ACB5A_DANRE	lightcyan1	-0.158045499207582	0.0831707209099191	-0.131302374314534	-0.00668311825407701	-0.204421842753654	0.381938592854961	0.0926347031490035	-0.340035343412936	-0.0699960205974448	0.263128056472266	0.557747640631697	0.353488608966175	0.962495988518415	0.146036806558574	0.00520556982248811	0.513648847231583	0.0136476986120493	0.621953194563859	-0.0124472197980207	0.591792590016353	0.670928926329144	0.665201646812098	0.282814002974624	0.37410190851102	0.107773826356895	-0.143191094422407	-0.236264026009708	-0.372725253798324	-0.520635030274442	-0.249944427147045	-0.18588598972826	-0.0247618361252216	-0.209050554596292	-0.147377935398119	-0.514324633308193	-0.0744278952472853	0.120147835394866	-0.0597619428323461	-0.127557803800868	-0.203015221078671	-0.102780015319336	-0.0237922210638234	0.229974485847537	0.674547809555596	0.930210828445779	3.82778464989481e-06
QSF_ACBD6.1.1	QSF_ACBD6.1.1	ACBD6_DANRE	brown	0.151993232537319	-0.00370363500716732	0.261684985644373	0.025405201052799	-0.234370282353765	-0.213241708180448	-0.0644835481298511	0.424762631502691	-0.217273051781507	0.282079427375413	0.979210968330184	0.060935082685065	0.858114461195536	0.0944519647510194	0.129053349190396	0.649708607228818	0.0016973659453006	0.121805418939782	-0.154062124308774	-0.117976283230122	-0.503352010684577	-0.44244093488651	-0.194225574178689	-0.203335356837583	-0.0566656817365094	0.235532312247492	0.257540332968655	0.641751493914913	0.608149525288423	0.30742246763324	0.041265365852198	-0.119118315868025	0.272833883209433	0.101248792653917	0.312435290324375	0.267896102027567	0.171656646392318	-0.155752290070836	-0.139089616685031	-0.0918961451217434	-0.0321298355807785	-0.0342988278898815	-0.212808196200421	-0.526242210330342	0.275502747244347	0.404859924100221
QSF_ACBG2.1.1	QSF_ACBG2.1.1	ACBG2_XENLA	lightcyan	-0.0132751215414879	0.199371559733925	-0.000193247274671327	0.387497698524807	0.171655518907026	0.293199944291249	-0.007206042581545	-0.011059443094011	0.170220526717156	0.92558160948804	0.156479715179488	0.998915156767621	0.00453733261874531	0.223683641567268	0.0349011158349849	0.959563815061669	0.9379756542291	0.227637359998304	-0.196635109291161	-0.0732191382977872	-0.20157318850582	0.188836509801282	-0.0744563528901661	-0.292765640565552	0.524979981190735	0.244156228939588	0.286778890288628	0.0767486427079879	-0.104108640359804	0.356616087367789	0.0125286726840548	0.100129850371824	-0.113123801165575	-0.183879294410287	-0.182370955746706	0.00743007742251973	0.0909472239380219	-0.0526360247541746	0.12769446873718	-0.293993283388864	0.0589853191772979	-0.540459177662631	-0.182715815328635	0.183352614199053	0.162362478926572	0.605959835372585
QSF_ACBP.1.7	QSF_ACBP.1.7	ACBP_BOVIN	grey	-0.0970352886047119	-0.0484404992270658	-0.20980142864558	-0.26555403123213	0.153128645961402	-0.197207164355694	-0.246574081747127	0.0105979626748989	0.175528337569371	0.493760965690284	0.73308977891785	0.135491529363116	0.0570790746208741	0.278457457190036	0.161119506798388	0.0780409238594504	0.940559011912457	0.213251664930576	0.240812368779868	0.034107535052346	0.203420714183705	-0.0934701011743157	-0.0420317009894568	0.108269087699085	-0.261121223041714	-0.0191237857608386	-0.0585322617461558	-0.257311140545757	-0.109783429478506	-0.264355395378263	-0.060847660486527	-0.0644236281983807	0.0280003921533435	0.15992753303865	0.0870053614534135	0.25029385367752	0.290189916702607	-0.203163046028834	-0.00127285300191612	0.206338105407827	0.104918034564081	0.381039516414444	0.331159303240665	-0.10437234688767	0.0854836826696776	0.810296260591631
QSF_ACBP.2.7	QSF_ACBP.2.7	ACBP_CHAVI	grey	-0.103349337907221	-0.0574452591307522	-0.0772465236671385	-0.24964140068434	0.154630179040538	-0.258207863627543	-0.354579919784114	0.0119446558823836	0.0698241427984272	0.465939348778904	0.685839101598451	0.586230859698255	0.0742927924628568	0.273714891439452	0.0645764601335313	0.0099042642971896	0.933022045436964	0.62281103537063	0.24760921059176	-0.065227535433544	0.120798448416311	-0.143982040693195	-0.0866169763246362	0.103412808348026	-0.20963659084939	-0.0113406522709612	-0.135074891458651	-0.259691138756765	-0.0678349509495086	-0.203740943608426	-0.176994800410956	-0.0752284610236238	0.0946094833240015	0.0672627104230231	0.0934023282561369	0.19515860097417	0.299196381599752	-0.293853567525921	-0.00186515090537308	0.193310155973449	0.024303208445717	0.366048552914092	0.322948329634834	-0.151712813748511	0.0767597095465615	0.645933889597324
QSF_ACBP.3.7	QSF_ACBP.3.7	ACBP_CHICK	grey	-0.0512051905065601	-0.21948322050123	-0.264071458376671	-0.364734922046682	0.123949171960121	-0.315260224836356	-0.219742111599924	0.139761419562195	0.0646663213794114	0.718468378433969	0.117965022323077	0.0585327107807013	0.00784961033223388	0.381320746039484	0.0228158262366327	0.117521268357266	0.323056942203123	0.648780470214592	0.356266070274315	-0.0170021430596029	0.156184829617733	-0.143700073863416	0.0204033053367321	0.172952876318392	-0.324909484671558	-0.109151772247035	-0.144579426795087	-0.24124810114591	-0.0233448522684193	-0.205071581771128	0.0574100043684954	-0.00249708077184649	0.0402811129790783	0.173796452696109	0.197514006358431	0.0775159383318363	0.110164054051927	-0.188472423456047	-0.0793195546495582	0.279838274749548	0.11312133357091	0.382860212721973	0.16228082021126	-0.15904376803816	0.00953396079410048	0.904774359648437
QSF_ACBP.4.7	QSF_ACBP.4.7	ZNF3_HUMAN	green	0.282590034356115	-0.05699601373419	0.24664167810001	-0.24727729846447	-0.143721163268771	0.11896571041424	0.130429424354098	0.0476599991254663	0.217939598265557	0.0423740257328028	0.688170164590549	0.0779567456663434	0.0771687048338285	0.309399094691272	0.400903441546944	0.356725980246932	0.737234863033728	0.120637377824354	-0.0325185299107461	-0.0167876796647671	0.0267624392649088	-0.132645941610835	-0.147968758627318	-0.104177503802348	-0.171728597448896	0.150750726684613	-0.0270482030904808	0.0111609553226338	0.104745083447308	-0.0539737416910882	0.643547821148687	0.190592509015782	-0.0920952705121321	0.101267029893669	0.210971701578508	0.190142253419512	-0.279509950928717	-0.0385511130771933	-0.0873537398246965	-0.206794546351431	-0.0022015782672014	0.163042917603319	0.0683265319309385	-0.143114301601253	0.818981933052369	0.905970084645126
QSF_ACBP.5.7	QSF_ACBP.5.7	ACBP_CHAVI	grey	0.00352551682927244	0.0858371386193271	0.254936419982875	0.127253697202978	0.0928454365598955	0.0166785352580244	-0.11886713455591	0.0289830188367462	0.104330888565538	0.980210567236375	0.545144449966528	0.0681594508708292	0.368655370759425	0.512687337944738	0.906578690849206	0.401296609771184	0.838383406886122	0.461691528095098	0.104550104079601	-0.0895282673460485	-0.309297639161814	-0.0645863046561602	0.0321856813848479	0.0528603380425719	0.290010530267415	-0.0590465657520275	0.0633259759379919	0.0776459738524452	0.357423682658819	0.503631696768019	0.0840596235336965	0.186722509318095	0.226756017863879	-0.0692832684390919	-0.0756180985577535	0.06714372662316	-0.0222879212301718	-0.175204200725169	-0.144844874554484	-0.214609204655122	-0.185248482774392	-0.36267649657854	-0.369878625259069	-0.129865122777007	0.460745710328008	0.527927334271549
QSF_ACBP.7.7	QSF_ACBP.7.7	ACBP_CHAVI	grey	-0.142688003807899	-0.203646786039658	-0.299979190146667	-0.366128777700978	0.163255802592031	-0.331703708589198	-0.269121684465392	0.026549413058017	0.203500293797836	0.312926434138538	0.147604946431314	0.0307241840445123	0.00759874388329703	0.247511520940278	0.0162945661544754	0.0537001815154357	0.851794374151566	0.14790273489057	0.444611816668551	-0.0264910883954473	0.237052254103607	-0.0743794594988358	0.0333431496144313	0.202743065270998	-0.269612567049743	-0.175439708584972	-0.151649134528657	-0.359094529828661	-0.128935171237759	-0.219602460351619	-0.190203241254317	-0.0916264697600133	0.102203115934595	0.0104712501241211	0.115461449824923	0.170242383705099	0.313831609575888	-0.0671740512285921	-0.00118067173537413	0.331675880540008	0.0988338479745472	0.381440600935811	0.245346745428479	-0.0753706714824567	0.000959144327510919	0.85211631241596
QSF_ACCN2.2.4	QSF_ACCN2.2.4	.	grey	0.134004999083612	-0.187020240387302	0.0451005751674019	-0.26885267325888	0.0412247981069931	-0.554432469689782	-0.0506228943590554	0.227020722958577	-0.0712815116984378	0.343580502470038	0.18431471589012	0.75087897566516	0.0539491806071709	0.771683802530589	2.00168635207809e-05	0.721539826825638	0.105558199333758	0.615553162968634	0.181264797333328	-0.209828797543572	0.0697121636687848	-0.208749952431577	-0.0534469633234077	0.17605299394646	-0.368429651990841	-0.199341515607837	-0.0230625940725788	0.0240106554706219	0.0712759128224472	-0.219877788685448	0.0497206484380225	-0.045100662009429	0.116103699570699	0.126610248732649	0.279611838794988	0.187187603273354	0.166620698319125	0.198731246387308	-0.0539919941634629	0.326392449694853	0.170189330898481	0.389676682905174	0.113322676111786	-0.217037167585647	0.198433243752016	0.135439379108088
QSF_ACCN2.4.4	QSF_ACCN2.4.4	ASIC1_OPSTA	grey	-0.0955241055693386	0.193238963841485	0.448728814896362	0.121086656817962	-0.0244732619567167	0.0496268372265242	-0.178153995440324	-0.0764764693561714	0.00111596524866647	0.500545179291397	0.169886420228591	0.000848351459595727	0.392498545562913	0.863268595501451	0.726803831764111	0.206375746011064	0.589980726671632	0.99373530286665	-0.170135816150074	-0.243318807467021	-0.308682924487521	-0.292480863371799	-0.314416892614474	-0.280818416152075	0.0647525993330385	0.469042423628886	0.237723918226633	0.00658779282250704	0.180421907876937	0.147241400111528	0.117818750779606	0.10983864413319	0.198242147490724	0.0715961854653708	0.183266486907541	0.142838186818398	-0.164084286542207	0.0489881195889007	0.244928097968939	-0.0455977498253475	0.0754215689023298	0.0030524795666442	0.106286147618579	-0.301524401124739	0.227872256020773	0.0821803725882541
QSF_ACD.1.1	QSF_ACD.1.1	.	grey	-0.148825345536559	0.0392964114789577	-0.0451329069587318	-0.157258677550901	0.0637692553500141	0.0715383850074067	0.0324206909055483	-0.257739221731577	0.097207570199254	0.292348122008755	0.782095852077679	0.750706135165188	0.265542403251782	0.653340889366807	0.6142776481728	0.819517447477357	0.0650802818233726	0.492990577452089	0.229102196112022	0.275059967247202	0.52703874046848	0.463621292171263	0.0469308125457974	0.23077665178645	0.0505865228709566	-0.123440106945952	-0.156504846545393	-0.390097583857939	-0.435853323031977	-0.206729193821849	-0.0859226274880767	-0.0623952231876806	-0.18938786538665	-0.278113324135659	-0.321120703376229	-0.180088980148956	-0.0267346375464786	-0.0845282137013598	-0.0113779255153374	0.0292052149100586	-0.253703220178687	0.0356796102152726	0.226017596523771	0.491733517646957	0.102315561586627	0.0484364867150794
QSF_ACD10.1.1	QSF_ACD10.1.1	ACD10_HUMAN	grey	-0.174275190014386	0.212499066640374	0.0567644117271161	0.258669567752202	-0.127725466987125	0.398113524120204	-0.0347473543520443	-0.386386975184182	0.134402847748663	0.216589229917122	0.130423249692465	0.68937303539403	0.0640831536819053	0.366868144137712	0.0034675374246363	0.806805263567508	0.00466447844854943	0.342136613402811	0.118287716209676	0.309082660176432	0.451184112687365	0.678488739896153	0.112884001032053	0.285392250559137	0.465593690842127	-0.00224482671279466	0.0199272561425218	-0.538008987337659	-0.596061851716993	-0.00139035420259207	-0.354079544946868	0.00253611030768456	0.0364702012404009	-0.0798200271138587	-0.502878501429098	-0.257873096812333	-0.0857794730576851	-0.181749431942915	0.0140323569154054	-0.0852116529497148	-0.133296925720936	-0.296848462131694	0.182630997727908	0.681139869196193	0.403612143692344	0.0257773520838644
QSF_ACD11.1.2	QSF_ACD11.1.2	ACD11_CHICK	grey	-0.213050820751161	0.300833537518271	-0.032511131824351	-0.0683978574670544	-0.29921613539323	-0.0820857567599806	-0.0870665362478831	-0.0451567938097093	-0.0424662764596976	0.129404426962543	0.0302286321043633	0.819022423062949	0.629948689212576	0.0311724828702599	0.562914916626359	0.539380084668525	0.750578447734586	0.765001527379609	-0.0330733278234794	0.0595977933947331	-0.0305476711923065	-0.24872280458674	-0.461933466628943	-0.275848348488618	-0.149187347224804	0.273364135697725	0.264080654572927	0.00103821923185013	0.00561801116489089	-0.177683253407976	-0.109482926990255	-0.198449385655814	0.247299172805837	0.00491369723133603	0.0745845290188776	0.233667188737713	0.242436291063638	-0.107001119384547	0.146733500323738	0.296628131449114	0.0873789908401566	0.331883599159943	0.547838552475266	-0.298146726283973	0.815946843587776	0.674710450059645
QSF_ACD11.2.2	QSF_ACD11.2.2	NPHP3_DANRE	grey	-0.0344636922106613	0.221943454142291	0.106539108710939	0.11987436328089	-0.214335099723883	-0.155800154903716	-0.164390774401249	0.15112749794636	-0.110215900633203	0.80835253142366	0.113799207372447	0.45221221740455	0.397289871277977	0.127056206682174	0.270056867278499	0.244195007316661	0.28486184510121	0.436668078046226	-0.255894511279767	-0.398418798518156	-0.597205643645496	-0.525551585247749	-0.449586871048626	-0.423138891276076	0.0933829548867113	0.553546142262106	0.418485596626799	0.323893890155922	0.317792347356119	0.182511728143256	0.0902582576326294	-0.148096334683031	0.337388883444416	-0.0200759718480763	0.150093494044209	0.193103066325878	0.177029331050494	-0.212688979426894	0.116152110045854	0.133793482528076	0.102095957059344	0.0119216894850556	0.198550604290149	-0.568172909230914	0.0670940864824267	0.00344038506122285
QSF_ACHA5.1.1	QSF_ACHA5.1.1	ACHA5_CHICK	grey	-0.049267612895559	-0.200911804047314	0.0185334455684096	-0.326727733895672	0.0320737326789333	-0.262652675646991	0.187762876703054	0.0142181168810256	-0.0152450980086789	0.728705363078872	0.153238264903172	0.89624293228717	0.0180749879867688	0.821417153584545	0.059951572514115	0.182546899598178	0.920311827022344	0.914576568098256	0.11715884132613	-0.225585943244484	-0.11116676918839	-0.156860692963837	0.06780533897439	0.213523662153648	-0.203078325545825	-0.372713507413476	-0.19593787431412	-0.0113350182181869	0.304838655948411	0.182027011289666	0.0493335987149455	0.156404262244698	-0.270982983573618	-0.0882691254239379	0.096749437110654	-0.031285775947571	0.0281800486322133	0.351163143493075	-0.0372853786688927	0.0643812261678811	-0.167409869233752	-0.00756151822384191	-0.431471006703953	-0.130590808278411	0.408145688876877	0.107839008704407
QSF_ACIN1.1.1	QSF_ACIN1.1.1	ACINU_MOUSE	grey	-0.0387400198323158	0.120809474286741	0.17954329939732	0.157994642695058	-0.185873953959492	0.323322037645915	0.273254249782625	-0.244997375920535	-0.113184565492451	0.785107149807287	0.393591042405583	0.202801353842791	0.263283663113422	0.187067473130693	0.019386561659103	0.0499906138622679	0.0800248396884076	0.424338575969602	0.0109102961202969	0.479795272353965	0.393892328838533	0.421224769646127	0.232236122239215	0.337229686115844	0.0336497592203513	-0.229363227411907	-0.121968732431697	-0.0719300143566451	-0.176961274513378	-0.123760758033836	-0.159000403350553	0.0645169324043174	-0.0489605859212042	0.0351683827168548	-0.302045070091595	-0.348946906672161	-0.220563440217183	0.0166781490690683	-0.13192567393917	-0.277469558704424	-0.194907903178806	-0.0529175814137731	0.0300728936697736	0.412212344326465	0.938810507902573	0.000319213173210706
QSF_ACK1.1.2	QSF_ACK1.1.2	ACK1_BOVIN	grey	0.111681955145088	0.0926203593602263	-0.153892240244002	0.119053535622414	-0.173755109529161	0.00518351805268972	-0.158190749850098	-0.0184935974161791	-0.17055775240169	0.430554403034182	0.513714326423477	0.276038925913871	0.400553341165092	0.217985029909163	0.970907234482796	0.262683969288991	0.896464797288466	0.226703917638043	-0.239146869302661	-0.12219743454555	0.0765356711401895	-0.0597125337639126	-0.259659619492391	-0.272116557513078	-0.0510886792800726	0.352291402619024	-0.0160296965606988	0.144507523945783	-0.321958702497621	-0.410686962706248	0.209606745304993	0.22562601694914	0.0116356290293038	0.0919612605125689	0.153692447011824	0.0611367516327556	-0.0415092760002989	-0.0241275661053679	0.234131187859651	-0.0210334655179182	0.411977945009339	0.228849794967841	0.40211703984583	-0.0287932967437206	0.0877356273611642	0.388138407632446
QSF_ACK1.2.2	QSF_ACK1.2.2	ACK1_MOUSE	darkgreen	0.211865534780251	-0.446979744532669	-0.207385048092023	-0.513038872716074	0.0188321978580645	-0.357465235959176	0.0630054909359242	0.0855454510383404	0.0216343012914876	0.131600505257377	0.00089393222372355	0.140155360968495	0.000100650131977301	0.894579802592263	0.00927794522418265	0.657233571315897	0.546516445425984	0.879003538957112	0.121477274211134	0.0279095168359613	0.26135759868774	-0.272676488771135	0.193262006117325	0.189149031937749	-0.727340323422363	-0.216619371843592	-0.304845760982547	0.0677952769054711	0.00713070005660586	-0.601517786266281	0.288296719804461	0.0448501210137818	0.038919737183664	0.349715413476076	0.489403843003854	0.0921279594261714	-0.0507143567478318	0.156954253852716	-0.13609237319541	0.164567349527204	0.124937853680961	0.700200129012739	0.135461962644311	-0.220980287036986	0.390961982756469	0.844293821828851
QSF_ACL6B.1.1	QSF_ACL6B.1.1	ACL6A_MOUSE	brown	0.0556834113709127	-0.179987641345855	0.0599401701842	-0.279209586519321	-0.170630320278969	-0.198354792845213	0.379633008284637	0.202322779478113	-0.0495022916306394	0.694997456932963	0.201667438476481	0.672946620362654	0.0450138147111974	0.226503396010559	0.158646957777032	0.00550706805856917	0.150312564196844	0.727462921892976	0.273634169110504	0.252820573740333	-0.0766322610212215	-0.027248704087814	0.173479036411378	0.341738184194215	-0.212277868853948	-0.304831035685801	0.12022802188225	0.37969552364971	0.5420634816861	0.30969073533087	0.09601162629237	-0.152578474939903	0.0144622899527098	0.225798585664179	-0.000304604347614026	-0.100564333761803	-0.150672174386737	-0.0429147156452072	-0.412995981884575	-0.161337822524635	-0.205778705648027	-0.0700357739854917	-0.466305248495231	-0.121989229819193	0.0496603060203114	0.0705599807850446
QSF_ACLY.1.2	QSF_ACLY.1.2	ACLY_MOUSE	violet	0.0149042466190892	-0.251123373615053	-0.258033198483818	-0.368228844986077	0.0759525864253974	-0.369148275188812	-0.0747786353699792	0.110666208285222	0.128144506650028	0.91647961651677	0.0725337296572298	0.0647638708816929	0.00723393432934155	0.59253794194538	0.00707907516282583	0.598286134371162	0.434785084745361	0.365285077561889	0.409473518560757	0.156805842178985	0.310479616150631	0.190715515393034	0.0264220535490379	0.683317645135752	-0.115779746920976	-0.241972692199042	-0.216132745650425	-0.172142156639697	-0.0650626658971282	-0.0610052437121348	0.0405924269064523	0.0232121236636319	0.125560391656481	-0.000840776984180787	-0.037453826274007	-0.0895757359666384	0.0633986845780743	0.0299499772730764	-0.0937623838907092	0.157157708703078	-0.0711397451583295	0.101627353914161	-0.0889192242116171	0.179618265459355	0.00257526955748074	0.266938605243757
QSF_ACLY.2.2	QSF_ACLY.2.2	ACLY_MOUSE	violet	0.185026822615335	-0.0807209082273486	-0.0143447604789547	0.00489590094636627	-0.0243395881007359	0.0888934780030578	0.10252811732171	0.106662673438449	-0.062180421158146	0.189120653393811	0.569446804531964	0.919604352406454	0.972520863300537	0.864008353382914	0.530869034879162	0.46950942202004	0.451684957218172	0.661448860895842	-0.0416088274477802	0.314357553155052	0.23401341049089	0.407280555992461	0.447389369671744	0.657926666177786	0.210659288864767	-0.17683321536186	-0.0940831316583659	-0.112947465231025	-0.192005397766759	0.0315601548481722	0.0224265838573905	-0.13174509082435	-0.0481953657747839	0.00917656437332504	-0.248777559976559	-0.118466919760573	0.00792649867620255	-0.120032883513122	-0.223359124676965	-0.250180853037111	-0.0975339464339061	-0.236267520015658	-0.22088464239606	0.424360161143752	0.769614979040653	0.0232297984448336
QSF_ACM3.1.1	QSF_ACM3.1.1	ACM3_PANTR	grey	0.0185126151549119	0.589157370292656	0.0471740776354802	0.494687894698793	-0.136080235926751	0.382861998662028	0.022020754396717	-0.127287415421135	-0.00382288897838523	0.896358910077707	4.33089594201906e-06	0.739819254528088	0.00019313361271319	0.336090431640296	0.00508893349354598	0.87685875649145	0.368527460507053	0.978541732846418	-0.410451124749743	0.0476617536554849	0.0360522113588402	0.294067578378086	-0.275441078385324	-0.353908319608876	0.556669689396456	0.408428146761172	0.268392704593465	0.053189522507249	-0.437910919459594	0.0324625937254114	0.15088395412221	-0.0920691770852094	-0.0190113471457516	-0.232536522311729	-0.283329965467856	0.0886604875598259	-0.00176692834037602	-0.20392411850411	0.200117744965511	0.00908164116910506	0.215519556429253	-0.287393078731564	0.480395736223525	0.268741665706581	0.00250896856682959	0.737225536699132
QSF_ACM5.1.1	QSF_ACM5.1.1	ACM5_RAT	grey	-0.0114425376360791	0.291300426519766	0.253010805605299	0.450410806095371	-0.15620335967993	-0.0322897142215781	-0.16110549128084	0.0950994476863997	-0.025987486151926	0.93583157865835	0.0361523575314673	0.0703414401512219	0.000806500693630397	0.268803782931509	0.820234466229309	0.253878489837743	0.502460200088288	0.854897065471124	-0.389639927580424	-0.419432316562995	-0.701714596789987	-0.518069839881826	-0.528984370005055	-0.524689197622696	0.294185146640936	0.465358541039416	0.436210071563269	0.22372200728247	0.331511246188599	0.396871220691663	0.0360441944149084	0.0283957429232625	0.348753643425148	0.0739841025354709	0.198441397644489	0.126967449247923	0.0186226693519478	-0.243397291038971	0.324303416667537	0.13344180677912	0.0868832523223321	-0.242011486675708	8.72129935212563e-05	-0.547946622994514	0.00430067897260449	0.00196719639486259
QSF_ACMSD.1.1	QSF_ACMSD.1.1	ACMSD_BOVIN	grey	0.184616959228761	-0.270169702765659	-0.0955808828809165	-0.261150499323746	-0.0423805822476903	0.0268582835034289	0.0327775529351216	0.15168238550755	-0.148884087634216	0.19011979451148	0.0527389840798246	0.50028942322955	0.0614838374513199	0.765462239280064	0.850089883137351	0.817564585905945	0.283076406806381	0.292155522759763	0.261526794507754	0.530155392676263	0.596627788007449	0.417193963578283	0.325385148179434	0.350560804083474	-0.241333539195026	-0.336584332014922	-0.311676608707796	-0.135178481924127	-0.299384978400429	-0.378325540838698	0.00282993411281255	0.0925988104927404	-0.100218185894056	0.1271582377975	-0.0324116138699425	0.0107172562198352	0.092332317537711	0.140227920054162	-0.25891163178377	-0.0267372401888778	-0.0249531443303881	0.279297590536389	0.142497891613214	0.40211852559171	0.0610970854017192	5.29467554982581e-05
QSF_ACN1.1.1	QSF_ACN1.1.1	.	yellow	0.141606606782941	0.0510022349326804	-0.0361745571775494	-0.0826454561461546	-0.255384586709782	0.199449048146552	0.144240405941851	0.0109081808354313	-0.211035753264263	0.316645852200224	0.719538414232366	0.799031654010556	0.560246483200967	0.0676594383724676	0.156315445645018	0.307635990634033	0.938822348730216	0.133154497228798	-0.541097016385334	0.117850781241215	0.00763093186712457	-0.0521256122888976	0.0354022654177726	-0.0539263491330286	-0.0725558213719215	0.153601292471469	-0.0840677427845578	0.0663041417163091	-0.0621728463859885	-0.169851111823309	0.101449126059571	-0.0426288298176781	-0.137350222685698	-0.209607261875396	-0.0562282056481755	0.216198990788796	0.152454354086435	0.144744403344212	-0.00349411327488669	-0.076458721503372	0.353032849767388	0.105872564186742	0.175442046958078	1.75340113616439e-05	3.44727570083703e-05	0.405363389103291
QSF_ACN9.1.1	QSF_ACN9.1.1	SDHF3_DANRE	grey	-0.187524129508863	0.371785363154067	0.249441320216525	0.266606967737128	-0.0525222633010844	0.10525213660836	-0.131847297407125	0.0827739596342257	-0.1373558467067	0.183113893225822	0.00665080857247918	0.0745328503908329	0.0560644802669595	0.711537504992269	0.457723831680361	0.351476899644814	0.559634667642691	0.331537388495131	0.00194750300370862	-0.0415202431203951	-0.263191228130726	0.00233570616526909	-0.286473070055714	-0.278557973458116	0.378540673611012	0.172079646401864	0.196542690249335	0.0979830347111902	0.175635816534168	0.455157423503411	-0.14391678250083	-0.0652933156173009	0.0319467467932971	0.0400385064553611	-0.13367425869578	0.102158722652274	0.0549978291268434	-0.347135502542739	0.0732376536489442	0.0286629972017599	-0.257777573862254	-0.341383296359547	-0.0208188572341672	-0.0725910129799561	0.989067519916478	0.770092055565617
QSF_ACOD.10.15	QSF_ACOD.10.15	.	grey	0.0969761374544933	-0.284354540327104	-0.148539379762947	-0.425657648758067	0.0437633110480391	-0.0466821534928002	0.126907930386494	-0.0629038195649749	0.106406830496071	0.494025614737846	0.0410473846117129	0.293286906287439	0.00165544752039564	0.758038299054608	0.74243847581392	0.369968584219294	0.657752443877289	0.452777032308	0.253906737339259	0.33351460771383	0.578007079098345	0.301486545127358	0.151366383913375	0.295990381394051	-0.328930423439118	-0.333354664102875	-0.302308611608035	-0.161310153927599	-0.260873943469203	-0.387482293399772	0.0739258955801508	0.0729860339486876	-0.373223146127631	0.0252974970932268	-0.050457027127087	-0.17891285944828	-0.162263545232853	0.0146812039697054	-0.0979999739668685	-0.0407482062318136	0.020265509060851	0.276704389533056	0.115606172651834	0.335144935535862	0.0693194124084602	0.015684810282841
QSF_ACOD.12.15	QSF_ACOD.12.15	ACOD_CYPCA	darkgreen	-0.0840426018132646	0.163972513936033	0.05149772499365	0.300132078431341	0.00606198626990296	0.178718581276548	-0.0135471804691126	0.111884990620329	-0.0953244821589264	0.553611487532734	0.24541367205481	0.716927000630121	0.0306350098781393	0.965979474051122	0.204917870632207	0.924060915590254	0.429711528030149	0.501444925660907	-0.105246283754726	0.00386828377302768	-0.325114757467083	0.205444470260687	0.0165277570771723	0.230586870887917	0.640159269006101	0.220534588782292	0.236559178162521	0.269092595901529	0.112404078853294	0.58375922668765	-0.104222921506649	-0.170219090378524	0.0241793958263019	-0.139650191462456	-0.298967407558804	-0.0739995886833287	0.138716533486242	-0.29068529010822	-0.0532894403508172	-0.306560658697268	-0.106250716636472	-0.710625789401062	-0.483296010691964	0.157155728108223	0.457748980446777	0.97828698785919
QSF_ACOD.13.15	QSF_ACOD.13.15	.	grey	0.00986215147784842	0.0906573255100466	-0.0313343268159378	0.119293046821607	-0.0302258307474931	0.0726756608043242	-0.10401740023097	0.0183078955384581	0.0106295026262309	0.944679311423333	0.522715109839938	0.825469011466643	0.399599475889183	0.831551863303484	0.608644082500577	0.463045916015532	0.897498844300175	0.940382432317836	-0.0234413452846857	0.211301611438427	0.150630868672454	0.251204877296212	0.0216043520437743	0.0376659859553176	0.205515503075033	0.138907260642704	0.398130708025467	0.098422180774643	-0.238878877614795	-0.0668777155628808	0.00260740933384362	-0.202157630768122	0.0469482512309531	-0.0737695204096598	-0.157200739603376	0.142331584471183	0.0903726991767782	0.116924166467753	-0.00863117790831365	-0.0862208415914029	0.0873941459726458	-0.187732998415885	0.0307000011170535	0.217163747764707	0.868982242457741	0.132655113401275
QSF_ACOD.15.15	QSF_ACOD.15.15	.	grey	-0.22795696129284	0.246817910742435	-0.102120330597973	0.135795719682765	0.0373665213539935	-0.0451825742121376	-0.254433435912902	0.0711292568285005	0.13365597310715	0.104090027445028	0.0777376190029265	0.471287616730598	0.337111252825271	0.792554063337329	0.750440645736403	0.0687241258138236	0.616309722972249	0.344850304584931	-0.182788524459205	-0.329658771210578	-0.363552337928891	-0.266860225084906	-0.0555283736125426	-0.0742122036880288	0.110512020046053	0.0952585838597156	0.369814296994456	0.0806617221873085	0.192583721433996	0.248001232467444	-0.0466162811004567	-0.359176977114341	0.155604808833572	0.0223926596158432	0.0794954738294772	0.342126258205117	0.173221029361745	0.158647170451075	0.175444545484627	0.208597593330254	0.128704751103947	-0.178054843676554	-0.214041673183359	-0.266978786615556	0.194622969486715	0.0170072903002044
QSF_ACOD.6.15	QSF_ACOD.6.15	ACOD_CYPCA	darkgreen	-0.108701988494903	0.410634826013841	0.260649270969043	0.633476128129882	-0.0990967426143034	0.258660801799597	-0.0954665523609138	-0.00449536006702227	-0.0554646850561001	0.443031897930381	0.00249668033332094	0.0620020440252652	4.64760039840134e-07	0.484583935330229	0.0640924914618754	0.500804499004391	0.974768212830698	0.69613747974163	-0.247227398296737	-0.0943426322291899	-0.484455088033827	0.169977591506803	-0.248052506874188	-0.194786238109987	0.87847983992454	0.451911338827302	0.471340851657631	0.258465397036516	0.0543322051371177	0.699164235096928	-0.172042366367074	-0.16744904920065	0.251724029788586	-0.149104606709007	-0.326269047248924	-0.0701565141153167	0.0568977359015164	-0.389458376136101	0.125610310386745	-0.117519956622378	-0.142816099048247	-0.820865129375518	-0.242294600140034	0.0876036653704102	0.0772303424021393	0.505882395803799
QSF_ACOD.9.15	QSF_ACOD.9.15	ACOD_CYPCA	darkgreen	-0.165524563891234	0.0892097682811077	-0.0195034613375336	0.213342257814885	0.173371691321113	0.125031403274634	-0.0865309577310686	0.0623599716582191	-0.0346751633773816	0.240912287864971	0.529402294949248	0.890844582708847	0.128868708279009	0.219018059828444	0.377144618107638	0.541887647285855	0.660530643493584	0.807198968275579	0.0787334189190343	0.0393831480292629	-0.185132818068831	0.260485387096858	0.150897471276752	0.314250932722009	0.557176318025602	0.0126553198691398	0.151464125444204	0.16595637862789	0.0535327509757566	0.519539884029663	-0.321707598910119	-0.169023144273661	-0.0477554653092169	-0.182466027593545	-0.304930543818284	-0.10984986289388	0.193127669671756	-0.188304803067131	-0.0400325466525587	-0.275179906730418	-0.0922988830030338	-0.654658254031293	-0.52926922158932	0.237370660740128	0.579020756289698	0.781626701289532
QSF_ACON.1.1	QSF_ACON.1.1	ACON_PIG	grey	0.0960315805124563	0.118074331271804	0.0531821825767167	0.0955088680863728	0.105241222544485	0.110852957734188	-0.0281309060841033	0.145949896317864	0.0269373111311114	0.498261621356198	0.404466846000937	0.708073423301822	0.500613828686695	0.457770728255692	0.4340055143284	0.843074204687801	0.301877019361671	0.849653880671189	-0.421401905369855	0.113262979721741	-0.0581128011243093	0.0592750619089398	-0.00183538179444653	-0.0414229909070067	0.19931448717639	0.306502871199199	0.153456520360488	0.036406432404423	-0.213542103459058	-0.118251743709479	0.000756372719841199	-0.306641085678541	-0.0791519278928028	0.0732886822797534	-0.0587909132124129	0.284286586769583	0.321687741497169	-0.316203756607996	0.0916921230408447	-0.0568912225908148	0.0179396259082355	-0.0992986459457851	0.191552002275803	0.07257414734778	0.00186334305950253	0.424015603912224
QSF_ACOT2.1.1	QSF_ACOT2.1.1	BAAT_MOUSE	darkgrey	0.179283122112379	-0.0690649133036497	-0.153583699772902	0.0473720050379969	-0.048693994603339	0.197242345893149	-0.0452850836355844	-0.132132449202126	-0.149327484054225	0.203467386249249	0.626606274412359	0.277014487902821	0.738766224599851	0.731745129743308	0.161043291809706	0.749892786434851	0.350427004711948	0.290704414236438	-0.20725565640935	0.137923557455656	0.199729989368827	0.200711966014997	0.115696658409271	0.176235503164004	0.00303699291925672	-0.0425317861807897	0.222184387935939	-0.135181174797293	-0.286279461240894	-0.16348827916356	-0.0125447137172609	0.0583654395057526	0.0636501679771313	0.093206187682519	-0.110170976797812	0.0257411378650776	0.00614799777518147	0.0692900217161391	0.0745609618043848	-0.118095961475172	0.813180472857066	0.0462034801912075	0.125217417782982	0.207757435836695	0.140408433855931	0.32952354983935
QSF_ACOT3.1.1	QSF_ACOT3.1.1	ACOT3_MOUSE	grey	-0.134621542952822	0.022892348445601	0.060602838669655	-0.22194737983587	-0.421674083596117	-0.200209361144196	-0.225905728021013	0.033133147501785	-0.144100407485213	0.341344520900838	0.872024722466094	0.669537695768554	0.113792651129126	0.00184938235692544	0.154710362134652	0.10732741276219	0.815619751761046	0.308110723429305	0.164444130942314	0.0787640727315654	-0.0344032572930122	-0.251887348234107	-0.096232968209415	0.177405955225089	-0.362267876543766	-0.0583263302146419	0.0230968043542472	-0.126190103242005	0.228379362742	-0.0989739761359469	0.0330067295733834	-0.13109670121734	0.281580709086793	0.155957068909965	0.128455921546417	-0.0731272187342339	-0.153959042747089	0.00268778547489681	-0.185774483618256	0.0504611287476434	-0.135298510126293	0.355134758979719	0.117880581736079	-0.276013080430786	0.244039841875229	0.578872538704168
QSF_ACOT5.10.11	QSF_ACOT5.10.11	ACOT4_MOUSE	grey	0.140242609995942	-0.08579466468998	0.271252112776661	-0.0364756669895408	-0.0408552700198289	0.0839646477787732	0.211361667646359	0.074056822896918	-0.0963620465631525	0.321377194837929	0.545344129163955	0.0517609277805274	0.797394022800484	0.773675993051989	0.553980703162643	0.132542499721747	0.601832589105188	0.496777469925936	0.192882305353771	0.141456578729177	-0.0107031009026688	0.14544028208913	-0.000684549861228835	0.264894701688291	0.0690517794914092	-0.172241767632187	-0.139225768383394	0.148418486084956	0.291160161697515	0.340163609138873	-0.0801064639850091	0.0538003691892513	0.0646866115262309	0.0723810006479939	-0.0994596106551597	-0.265241742864706	-0.170899509320796	-0.174708685234919	-0.209937316841515	-0.281170931224108	-0.209421869350795	-0.196144264711666	-0.409681791570729	0.0771375177980015	0.170691035809016	0.317164079482491
QSF_ACOT5.5.11	QSF_ACOT5.5.11	ILDR2_HUMAN	lightcyan1	-0.0562901783022758	0.388598977715126	0.134240533201607	0.244396447086029	0.00799345835371471	0.369782193666549	-0.013583029669168	-0.166378055690686	0.0980795530747093	0.69183843437284	0.00441428277731871	0.342725237071101	0.0807913435778693	0.955149581644923	0.00697399255265074	0.92386055372907	0.23846109801784	0.489100947748756	-0.121824455544642	0.485329454106814	0.441888906154601	0.606789608383172	0.233342278607144	0.0993163862574727	0.34379467166516	-0.208337290918494	-0.250243630142196	-0.103138651315828	-0.439949144130779	-0.00156165605778068	-0.00904079109623817	0.0530563354136425	-0.238278347190758	-0.136647244305948	-0.332103636288208	-0.0587841668843319	-0.0952537140852319	0.112986983845667	-0.0432632493808414	-0.0591187086558818	-0.0489718751739236	-0.245224079091139	0.0913480885668134	0.594119824766044	0.389599261484408	0.000265551996503599
QSF_ACOT5.6.11	QSF_ACOT5.6.11	.	grey	0.0792333274613582	0.241530557230726	-0.00622714671566577	0.437102698828806	-0.0293581169512801	0.217626453028982	-0.159064193527815	-0.204372009185473	0.04153308069131	0.576605754335918	0.0845267012465929	0.965053143002262	0.00119513985683904	0.836320282055225	0.121185063416364	0.260024099637751	0.146137259325372	0.77002291277965	-0.366853073495703	0.154920690001516	0.166015756504244	0.332462675174454	-0.257484475337852	-0.196937237072994	0.445408541865651	0.323445588384832	0.0907182160457451	-0.0474966544051897	-0.398429247820102	0.00667068775902643	-0.0941596412938422	-0.0495755201677703	0.0464015783011801	-0.0612857168044522	-0.187885692627453	0.161897084720498	0.11602513604947	-0.231013571240582	0.162879883479293	0.0891332013177148	-0.0120164786405917	-0.23039617628078	0.337603369506119	0.295789253910614	0.00747115784816068	0.272803535965288
QSF_ACOT5.8.11	QSF_ACOT5.8.11	ACOT5_MOUSE	grey	-0.0443103661585162	0.201438208758584	-0.0336412991851261	0.441644497883834	-0.0579456705560008	0.10740952836133	-0.247536769226195	0.00143787706043434	-0.120026541126897	0.755107054241117	0.15214187734824	0.812842458451582	0.00104687656578187	0.683245955818538	0.448505256840328	0.0768488281872638	0.991928238745468	0.396686551493389	0.00942242460053314	0.0624295401160636	-0.181214029439824	0.221728237941661	-0.0256250511100655	-0.0171298044243421	0.535121485069987	0.124453677849693	0.0546654287645931	0.0862238806483267	-0.0193980314232191	0.371065577445161	-0.212074561471703	0.0168978005247991	0.271629702261325	-0.149330117578953	-0.307298361978753	-0.202073793170308	0.0343994611597646	-0.126390224121344	-0.18613218047056	-0.0441329012130406	-0.304752071959478	-0.462046730184706	-0.127910097659974	0.152245110770118	0.947142328732968	0.6601750049579
QSF_ACOT8.1.5	QSF_ACOT8.1.5	.	grey	-0.252230835000003	0.127853064548775	-0.0183180389127874	0.0797362134229223	0.0768757153719747	0.00282895212844587	-0.126508897042052	-0.246140220169625	-0.00387646776713476	0.0712409130580564	0.366385661909705	0.897442358397572	0.574181026280901	0.588035215010777	0.984119962275396	0.371487600437633	0.0785829241130751	0.978241061423054	0.218188224214041	-0.0331671431917942	0.232196999982249	0.303176995214752	-0.0413963230725087	0.0606474869700207	0.246541173289605	-0.213303891865229	-0.143219958131478	-0.287643419631274	-0.270306716428275	0.115079269935792	-0.128302327628452	0.184809729206923	-0.210469515156087	-0.243931347819303	-0.083453680617385	-0.126824222405759	-0.196249423889108	0.0584628144221173	0.0117725744477494	-0.0247477251292844	-0.067266473375589	-0.193275083027109	-0.0222700507079326	0.329648582677876	0.120203874660169	0.815433878442336
QSF_ACOT8.2.5	QSF_ACOT8.2.5	ACOT8_MOUSE	grey	0.114871762642914	0.170371019508129	0.23038214058431	0.201438264841441	-0.031633430905225	0.231096786419535	0.122831954620244	-0.00280262690983191	-0.106014678420478	0.417420191916535	0.227220467599394	0.100360089013201	0.152141760849044	0.823829406659699	0.0992809055956027	0.38566061878933	0.984267717579588	0.454453751035373	-0.225383501622838	0.19548700277551	-0.000126597391138546	0.260373809367338	0.198822017731494	0.0571617225578227	0.253006876088024	-0.0118644429832663	0.00421593690020235	0.312195505361905	-0.046461073550951	0.103298497989234	0.00174935030767476	-0.0929872525107624	-0.0783275790950294	0.0576843395299964	-0.117141256508087	-0.0682404707715939	-0.0292608776024205	-0.0554745054557262	0.042088856350023	-0.412081362304132	-0.0215310503438185	-0.298930134471094	-0.189051754134659	0.245161143088872	0.108163843814593	0.16487824886191
QSF_ACOT8.3.5	QSF_ACOT8.3.5	.	grey	-0.067636764469117	-0.127782867520472	-0.18852307124657	0.0371856805221864	0.39416859314448	-0.0234729637190786	-0.335900260155915	-0.00562421861137244	0.0602764444979106	0.633771284939499	0.366651049091181	0.180749945320306	0.793535940595581	0.00383581018421073	0.868807073417866	0.0149113150324956	0.968434982170082	0.671215925433694	0.246155425829743	-0.148845364727015	0.0354597602495316	0.124933737496703	0.0138985747138379	0.0098347828897574	0.17713484200618	-0.0777352381958885	-0.130884323999807	-0.225410099682317	-0.217652208817164	0.087709605745302	0.0332991335175787	0.143698395471683	0.0258811263692611	0.171132815397131	0.0584458981151448	0.0243915156380106	-0.0915197284828898	-0.195080417448422	0.135210378851029	0.147860927164246	0.204877791682181	-0.112385899561512	-0.119802586169383	0.152261691150156	0.0785638784029536	0.292282475280505
QSF_ACOT8.4.5	QSF_ACOT8.4.5	.	grey	0.0723417982495566	-0.36017287549578	-0.204113622179696	-0.127280047548221	0.359146788622205	-0.384622183130281	-0.461756454308897	0.3118032558371	-0.158657662682595	0.610295577907656	0.00872165605185142	0.146658929059966	0.368555408288194	0.00892896989872828	0.00487293157082572	0.000569424324705118	0.0244356218957934	0.261259837422679	0.26301353980966	-0.332558245049833	-0.187868768510706	-0.199266758127227	0.0546066122480967	0.180137576549207	-0.0889298788452871	-0.339633098305294	-0.200236734731397	-0.0637264845730786	0.181178518097898	0.178910970434585	-0.0535841236597053	0.165697344954193	0.0408047409783378	0.161502808919119	0.35526891839193	0.0281672874030091	0.101191789432118	-0.0577517004459123	-0.0138677372432278	0.131166151386394	0.028598343504424	-0.00221763341368967	-0.425701453608933	-0.179058484335398	0.0595880925035614	0.0160043609755925
QSF_ACOT9.1.1	QSF_ACOT9.1.1	ACOT9_HUMAN	grey	-0.101006304433099	-0.00122655273880247	-0.19413989668539	-0.230290061330877	-0.103803393643343	-0.0625463323886093	0.024548332736419	0.106035531644332	0.00518500305781472	0.476163745211626	0.993114511843872	0.167866214648716	0.100499794271388	0.46397173727312	0.659578122554227	0.862853200932661	0.454364503891224	0.970898903398123	0.237505475381611	0.265883741935567	0.384218147148845	0.177783859981505	0.149591831393647	0.183483131458851	-0.221505521471878	-0.0277423760585623	-0.123427437482362	-0.322683785747501	-0.291471648179657	-0.373999441554158	0.0671638787305024	0.0218143482360699	-0.0557186793385646	-0.137477621313455	0.00819702286152523	-0.0855644805685096	0.135251194005454	0.225153232839643	-0.080912541577852	0.074997021697316	-0.0469595519501917	0.299839833601467	0.263704277954842	0.216032285719755	0.0900001099299649	0.0567597900922092
QSF_ACOX1.15.39	QSF_ACOX1.15.39	TCB1_CAEBR	grey	-0.168612799538556	0.204993996102989	0.155062171800438	0.383999815278143	0.173132167461623	0.158540361276569	-0.133885797132679	-0.240638347074629	0.0660046096732135	0.232124056838979	0.144887148638843	0.2723604262047	0.00494836870682956	0.219665127571036	0.26161713088623	0.344013848772267	0.0857168386218617	0.642000719331144	0.16675170542222	0.150660222123467	0.0576278941489998	0.325361472351665	0.0430793161958289	0.0842536933205197	0.393968274023177	-0.240743750857132	0.0961577749405062	0.0374339267901676	-0.0341998630564839	0.333869442759281	-0.382857310221532	0.00953858342865823	-0.288031423475409	-0.0177310329755141	-0.305878470616025	-0.430009866115341	-0.225808507293908	-0.106208649254743	-0.0271522286953786	-0.226153732738891	-0.323798848370985	-0.491423150795585	-0.324601962883582	0.272097693784745	0.237393383560611	0.286371095042074
QSF_ACOX1.16.39	QSF_ACOX1.16.39	.	grey	0.031976261965697	-0.297503005849137	0.005246551409013	-0.292233620762434	0.289105462707026	-0.280532664084201	-0.0117092675597964	0.246723012288294	0.0649525834827856	0.821951019855749	0.0321988054008534	0.970553611332095	0.0355330924263965	0.0376441526823207	0.0439650476723605	0.934339029600031	0.0778555546856802	0.647327871391888	0.242074311277705	-0.214651125460467	-0.0669139690742162	-0.439574861327521	0.125643792908859	-0.205843537300652	-0.568788481206014	-0.170901279727002	-0.219459132371254	-0.107475415538286	0.290650399296808	-0.194186167813335	0.209021521858289	0.133004900178139	-0.108782872423807	0.107018396766305	0.450108455221769	0.211206408325701	0.0099143379405649	0.045239330506291	-0.227601474002417	0.13324658049764	-0.0350250798601022	0.49282910901625	-0.0145972312385331	-0.402935528573855	0.0838077587310257	0.12648333469643
QSF_ACOX1.17.39	QSF_ACOX1.17.39	ACOX1_HUMAN	grey	0.221896504933469	-0.443598332780939	-0.0669478474146379	-0.353587568616483	0.00130939344546799	-0.100232813996455	0.130343425869212	0.0680637754042698	0.0435580662993626	0.113877638909819	0.0009883372865971	0.637239570564594	0.0101279541725546	0.992649482062114	0.479565040722639	0.357045886250201	0.631625443807842	0.759138919972522	0.446083865176083	0.449219355764323	0.435790252563234	0.327023027340298	0.388343462342546	0.643425615644271	-0.288787137200949	-0.4206808033471	-0.190242378389035	-0.167238839417659	-0.0322736709451634	-0.160372135852995	0.0876830066954217	0.129161552053034	0.0821744113381144	0.306345455052184	-0.0526643736846214	-0.231655763480339	-0.137496712236724	-0.042282488891048	-0.30713833334643	-0.270331925523375	0.032100525209171	0.15966969739061	-0.251719060148228	0.29906439485833	0.000918120678220962	0.000835948791353821
QSF_ACOX1.19.39	QSF_ACOX1.19.39	.	grey	-0.00866595185835708	-0.319662226203974	-0.0925681358305254	-0.240172979512563	0.285684768142743	0.0386327496873558	0.166430595083969	-0.0723876900349013	0.0221898603500331	0.95138065036166	0.020884988504304	0.513952761674162	0.0863427908827936	0.0400699721715836	0.785688076546774	0.238310767011419	0.610068453790489	0.875920507323195	0.307405776049793	0.244017118854509	0.287292796969932	0.124170475648629	0.535445158101321	0.289933955887784	-0.265861919101079	-0.26061414678712	-0.248097917599989	-0.163630205296835	-0.0253017945530228	-0.187170013291143	-0.109140520432378	0.245629515461902	0.0304354187400771	0.125036488672819	-0.024628904798157	-0.245249255304617	-0.0741334489274856	0.0075444900939708	-0.294169675343884	-0.184434445743236	0.00746236753748511	0.176682085750684	-0.141587197223307	0.170830702197264	0.0266347176714439	0.081278156914222
QSF_ACOX1.2.39	QSF_ACOX1.2.39	TCB2_CAEBR	grey	-0.0415666340193742	0.0674167426236464	0.0113234907338636	0.0349236002824334	-0.0078506052318142	0.166873588063543	0.165117700785261	-0.228871842103792	0.0631515347744951	0.769842203896691	0.634878120390515	0.936497804059211	0.805844278530293	0.955950317538649	0.237045810007066	0.24208681500996	0.102670591741817	0.656488527348546	0.0968254834171147	0.348776457094267	0.390941383357712	0.374201293416128	0.227213352796848	0.229833655932567	0.0382666583073304	-0.050385561420964	-0.00400511396283837	-0.247202036153107	-0.350503034906524	-0.291392677365864	0.000664848544309024	-0.0135028716066335	-0.0247655291182561	0.0867455143186076	-0.269358109327338	-0.107509627518618	0.0198658632604975	-0.138271507899527	-0.10362740777283	-0.148380318511604	-0.082741452983226	0.0268772923195574	0.182556296300429	0.389592089486826	0.494699990475692	0.011275331574716
QSF_ACOX1.21.39	QSF_ACOX1.21.39	.	grey	0.0206093149390876	0.0579770238296817	0.14737952811759	0.0909001465656748	-0.114041460935475	0.122693534528102	-0.0838543579801742	-0.103788003849932	-0.122140608969125	0.884696259120571	0.683083602490096	0.297114622036191	0.52159750061619	0.420816770514957	0.386200346017088	0.554503271051656	0.464038354083922	0.388360768246982	0.0404743407736172	0.103429431764386	0.317556884090145	0.222426539895102	-0.165770060940537	0.100736267999774	0.0342651764174569	0.115581705751795	0.0266791255488715	-0.306071176655762	-0.359854624724341	-0.217893510030966	-0.0481151825138045	0.02666085570859	0.383427183627579	0.0912207275746359	0.0439237512176291	0.00584293346182846	-0.0363405509417587	-0.105737062701223	0.233241950009514	0.178368253368611	0.0937965195500625	0.165222015800587	0.322981193928023	0.221171981485262	0.775731163329425	0.46559194286384
QSF_ACOX1.22.39	QSF_ACOX1.22.39	.	grey	0.0726769306074859	0.341011738968635	0.220262251403339	0.389381273244294	-0.12595226471777	0.0729892494634886	-0.120140763932221	-0.0709707449971939	-0.116878167448196	0.608637804935568	0.0133630860522759	0.116633560542508	0.0043286645192284	0.373612810414479	0.607094634524541	0.396234059564823	0.617097794127462	0.409277419283392	-0.210291806721691	-0.138249585198886	0.018497878746223	0.18225046812712	-0.201631622698191	-0.183635171473472	0.310371262870989	0.309636929576977	-0.0213654271153789	0.117290630116126	-0.307195040836877	-0.10836061577326	0.0304783523267385	0.172206672350868	-0.0179920705384126	-0.0267694267719432	-0.108990097617144	-0.200798035763517	-0.185509987356162	-0.0726926574570185	0.262656585849207	0.0390763324348838	-0.0452247080805505	-0.0953745922926684	0.335116366052176	0.170795120094717	0.134559412023916	0.328370513513224
QSF_ACOX1.23.39	QSF_ACOX1.23.39	TCB1_CAEBR	lightcyan	-0.224881770040234	0.539299356578163	0.247789689723682	0.351373739970986	-0.106010689375372	0.164880494534118	-0.0895453100484248	0.0684110335184889	-0.0821949833000154	0.10897215204261	3.70287950057534e-05	0.0765380361885242	0.0106427512084324	0.454470824349611	0.242773378478272	0.527848467253184	0.6298825965467	0.562393699433641	-0.157227074317417	-0.14460661795303	-0.421853174833449	0.0263839673473511	-0.267309739627271	-0.222604922482023	0.597816287069739	0.292967024145191	0.343138568984319	0.331055095505904	0.124149364756819	0.494256942702591	-0.0895925355579264	-0.277557065798967	0.0153532249461564	-0.142663886353568	-0.223035291123101	-0.0126000820397682	0.0919839126564972	-0.334921076759986	0.114926817169237	-0.0618973765666371	-0.221694305247184	-0.56496500510241	-0.11890709803268	-0.040808560431349	0.265639685145468	0.306396392167973
QSF_ACOX1.25.39	QSF_ACOX1.25.39	.	grey	0.066512865546131	-0.234827427800574	-0.0829538954556613	-0.458735083984736	0.0300202318915274	-0.406009775203358	-0.220493874531158	0.294139460569633	-0.128490808000905	0.63943342503005	0.0937923840881177	0.558778507048082	0.000625464602386844	0.832681170876406	0.00282285281346055	0.116239903197121	0.0342956206823423	0.363979931561042	0.350067427354964	-0.0548792953516126	0.114855496453311	-0.232133897848306	0.00971270309170788	0.0888442017374935	-0.488661168831708	-0.198240466370208	-0.289971110260103	-0.0849075666200105	0.192017831666559	-0.240339937187124	0.211408336819512	0.129615974358419	-0.0912981544219609	0.0210238832764542	0.218638717099944	0.185221279860489	0.236190478471119	0.0472704676001567	-0.332987456692043	0.036121542155223	-0.421648837700976	0.475986833840958	0.129589869035106	-0.265509945455193	0.010956976939436	0.699191858509466
QSF_ACOX1.31.39	QSF_ACOX1.31.39	ACOX1_CAVPO	grey	0.23529894414227	-0.367572351917146	0.102857550143651	-0.176240339915325	0.000630769824282836	-0.0652914747947189	0.0585427407440489	-0.0364156795875714	-0.103833433147675	0.093115826801643	0.00734630283741847	0.468075527929535	0.211371474060114	0.996459021724334	0.645609895243792	0.680156658800325	0.797720204624451	0.46384172207559	0.304286372137169	0.289969517630921	0.385973497254499	0.211115409010267	0.179925368895665	0.223358288892449	-0.186966111190434	-0.131092891388752	-0.181213565453504	-0.187945068848671	-0.181622664686559	-0.291954429672428	-0.123828420896701	0.231138028024447	0.0197515043024061	0.288489061665106	0.184914594790748	-0.176515366315173	-0.100715146489072	-0.0852429214758388	-0.168020340451753	-0.294607403158125	-0.143091681479903	0.190016181956215	0.044699836395167	0.241378650014028	0.0282931845822843	0.0370509533148367
QSF_ACOX1.32.39	QSF_ACOX1.32.39	TCB1_CAEBR	grey	0.214549665007784	-0.0909187580609904	0.0656892095536724	-0.211337577576133	-0.0413620273917067	-0.0340697947085071	-0.0886196604230223	0.112866304588243	-0.154748454952097	0.126667043030508	0.521511888480719	0.643595954680986	0.132587663303222	0.770944346254587	0.810502295378924	0.532140427819989	0.425650857798151	0.273343607493228	-0.111539461887025	0.174072698234539	0.165342223348502	-0.0895610669776099	0.39869247762517	0.0730011071647958	-0.359152130094234	-0.102103471769066	-0.082098011255484	-0.0893269299701289	-0.0948822208071005	-0.412803137405705	0.201395894123125	0.0416266134760441	0.00747796367861388	0.357013251894671	0.230558972288531	0.18848309048855	-0.0185087541092989	-0.06662338215532	-0.255304607422371	-0.176130921846385	0.202662945150681	0.348589520653013	0.113051784025862	-0.0421689797172264	0.431146500126798	0.217131937178356
QSF_ACOX1.35.39	QSF_ACOX1.35.39	TCB2_CAEBR	grey	-0.0729534535188963	-0.100869337383776	0.013307558106502	-0.280743551892082	-0.0817758594459057	0.0759856302187245	0.18601789817075	-0.243626154003337	0.124526739775989	0.60727141664147	0.476765099354547	0.925400288910775	0.0437997458298208	0.564394941869581	0.592376500636573	0.186720190269186	0.0817823167155855	0.379088606524912	0.23615793181169	0.200416319079552	0.306734991628156	0.152419187103061	-0.00240840359423286	0.177167910253694	-0.186256426452183	-0.269940849638843	0.0335755879549365	-0.0747047762810518	-0.0217834820554753	-0.109656740796451	-0.268018060743039	0.0295316440782662	-0.249693231215635	-0.0376221238682949	-0.094012959102712	-0.0771704276682345	-0.014079862901323	0.1384280450079	0.055739395479312	-0.111943418720707	0.114162472900005	0.0579761957381423	-0.0952060658569859	0.151613590373276	0.0918930713249474	0.15427556602541
QSF_ACOX1.38.39	QSF_ACOX1.38.39	.	grey	-0.106533346588784	-0.0629456270096614	-0.177843816721811	-0.0426787574863931	0.0192587448542819	0.12642590138137	-0.00201907388822271	-0.212213370496319	0.0706395443610582	0.45223681305051	0.657539063202611	0.207179791390628	0.763859528314366	0.892206030479003	0.371804013938484	0.988665776177219	0.130953157640256	0.618745799869216	0.176819909756154	0.241404088486344	0.522091814317322	0.487791240463114	0.226044209060941	0.269772102543799	0.0702120616445072	-0.367528833966328	-0.390424523119375	-0.239128275189156	-0.374975208367439	-0.139799614268383	-0.195991064816211	0.23503558082055	-0.365117914849182	0.0347165877160128	-0.218549986483506	-0.262847759276186	-0.0953914589971026	0.0708161290788384	0.00275793530036764	-0.0183884501071035	-0.157864112976297	-0.0874374730536011	-0.0168164866084061	0.514643886899386	0.209849602207214	0.0846946075767626
QSF_ACOX1.4.39	QSF_ACOX1.4.39	.	grey	0.0951343314122692	0.0202681839444268	-0.309028838357273	0.0816536354962802	0.0991426181253664	0.419249262987926	0.0893010059206781	-0.2323436932338	0.186209002222479	0.502302748291558	0.886592177992411	0.0258045064529358	0.564979164921704	0.484380734882243	0.00197710526950986	0.528979568294055	0.0974194815817409	0.186259842435376	-0.0176928608705544	0.156922876443171	0.214220814129213	0.388805625268426	-0.0334173495146756	-0.0241972936306467	0.334716300594315	0.16657166370533	0.163296985264235	-0.134310332836581	-0.247440496666773	0.130689912401525	0.0709988692871752	-0.132681213034978	-0.0981834354914975	-0.251832448290817	-0.239753859381582	-0.145569096100034	-0.269376866652266	-0.0575608720920106	-0.139861710593535	-0.159701420648848	-0.0694240793270131	-0.261766200111929	0.121685723642391	0.364313283830715	0.90092474874623	0.266577291804348
QSF_ACOX1.5.39	QSF_ACOX1.5.39	TCB2_CAEBR	lightcyan	0.455130378537216	-0.0348234475591715	0.0849388273014094	0.0332433748654227	-0.206891096464334	-0.127341719737339	-0.238560573335311	0.0948184721580238	-0.344428854621913	0.000698800644511143	0.806390328805553	0.549375089582684	0.815017114168116	0.141123297026592	0.368321513076142	0.0885393144709404	0.50372933838895	0.0124067051811327	-0.352137334627814	-0.0916789085841942	0.164541799629011	-0.180033235805531	-0.0788164662696481	-0.142516833825178	-0.312962434282117	0.0931158260160147	-0.151926183354505	-0.0972835322818355	-0.227836572155621	-0.548404869812349	0.110697451505571	0.248215252637993	0.184631175088168	-0.0204766399124079	0.232613302504793	0.290870803189511	0.282998077531102	0.172376754671063	0.121068157248586	0.194507450794423	0.345554840299024	0.549135274060554	0.583973924175306	-0.146675170381453	0.0104626953962513	0.518021227579233
QSF_ACOX1.6.39	QSF_ACOX1.6.39	.	grey	-0.0548273758254183	-0.23789557369503	-0.10051104352579	-0.19819740459438	-0.122777712631282	-0.118912270084793	0.132558863426536	-0.120389553991886	0.0391886819012543	0.699462987108557	0.0894578384590098	0.478340094716662	0.158984390762811	0.385872065739325	0.401116559590307	0.348860600936348	0.39524952797179	0.78267865943112	0.155070524974765	0.00914390563301102	0.085371835889955	-0.0844808494379188	0.137652226112834	0.0828364045797503	-0.336149356344836	-0.476510833020093	-0.159951767655078	-0.0065816308062673	0.207227106842209	-0.0247116388564188	-0.106181884094777	0.0966540093838313	-0.197153849510979	0.167186539677784	0.227965383311941	-0.247489159825033	-0.214232725355711	0.233806150509962	-0.063496536235439	-0.115597051111357	0.0930677164465072	0.115081631311332	-0.267495034090478	-0.0587865050544909	0.272334279665746	0.948702636162309
QSF_ACOX1.8.39	QSF_ACOX1.8.39	TM208_DANRE	magenta	0.199058525665276	-0.0983914433264718	0.213106395477462	0.089270437154869	-0.0753159816546994	-0.0985314411798044	0.181415665270747	0.190884129038786	-0.0793073205144997	0.157144615888321	0.487713610046104	0.129302140497624	0.52912118242675	0.595651998815104	0.487091547504381	0.198053637524761	0.175250126291897	0.57624869390573	-0.168853639838365	-0.0138800297650435	-0.371435078890644	-0.106420348362848	0.127853288959609	0.100317526479701	0.1689647047127	0.160872289790582	0.227632432872563	0.650175037499614	0.377190320537338	0.371183051725976	0.0859724900298266	-0.162909000483558	-0.064167158777295	0.137874423845275	0.0765186060127221	0.0517586324899406	0.0193520512580544	-0.138096000251067	-0.183783584042658	-0.352780618784259	-0.0459128744061872	-0.340847843016441	-0.487154889383372	-0.160151703175906	0.231448094589842	0.922200795832212
QSF_ACOX1.9.39	QSF_ACOX1.9.39	TCB1_CAEBR	grey	-0.168917572026748	0.291708538944128	-0.074430466655553	0.0330702561510319	-0.0492973564625535	0.310330521056612	0.253366540900463	-0.15481210520008	0.124992764494502	0.231268885160682	0.0358804466035013	0.599995630956102	0.815963640220944	0.728547855727245	0.0251544619260908	0.0699342122591829	0.273143939084696	0.377293245536358	-0.143216160589782	0.45689372139802	0.389245844511017	0.365887122793006	0.00890031165504467	0.0592106990459538	0.0952022202618306	-0.00233639833447578	0.036318799337996	-0.134697470459889	-0.31991929796638	-0.138531227158288	0.074328277646089	0.0698010190429907	-0.310762672967411	-0.0372116718814821	-0.304144520324861	0.00832514698896584	-0.0658499159955592	-0.0892241529656315	-0.0342549642407495	-0.156686397846514	-0.0805650127077703	-0.140087466162956	0.081325905133216	0.401255859741302	0.311120043633716	0.000662010605994152
QSF_ACOX3.1.1	QSF_ACOX3.1.1	ACOX3_HUMAN	lightcyan	-0.082393563426317	0.151089953501805	0.208133100510846	0.446773872521642	0.0239283410268524	0.333855036097447	-0.0931316914818134	-0.19074288895016	0.140660257780914	0.56144667594676	0.284982916453126	0.138698935389911	0.000899439459767562	0.866284937741428	0.0155723834448216	0.51138270664137	0.175575684589666	0.319923754915753	0.0450874195565361	0.050691040336923	-0.126121719703722	0.354709969848911	-0.0870591205503388	0.0425960063602663	0.710092975493234	0.2269876903831	0.16858320725062	-0.128249881726457	-0.122191052436416	0.515797619531991	-0.199027370704809	-0.0934300238594741	0.143523105747193	-0.218497411299899	-0.37287269228149	-0.330850624295265	-0.181661772166619	-0.22254193347851	-0.00259274089929551	-0.105062056571047	-0.429937546483621	-0.63050874399998	-0.155047263394478	0.296136926783289	0.750949306892316	0.721180149836309
QSF_ACOXL.1.2	QSF_ACOXL.1.2	ACOXL_MOUSE	floralwhite	0.247891297690092	0.0301119492921642	0.120733621246062	0.395642658719972	-0.167730581592734	0.192536178636544	-0.0831150902759787	-0.0422079207216609	-0.0126721682956356	0.0764134591274523	0.832177346626196	0.39389032307786	0.003694355318642	0.234611761573549	0.171474534917067	0.558012043137193	0.766390751811255	0.92895279420076	-0.17537180678749	-0.0418300726415497	-0.135762604882441	0.102972912513686	-0.0380239427122242	-0.216444220970587	0.386535657665871	0.41014162977445	0.122165025689648	0.0660591500899043	-0.204854909737458	0.0158898295341174	-0.0445756237767186	-0.0557806400067516	0.572013895286569	0.0896318865055198	0.0686388334422175	0.0460090681660207	0.0838513121682045	-0.0574708590951798	0.104772873868458	0.0935037998966375	-0.0899151895905538	-0.174862389923926	0.136443730036996	0.0838356451812185	0.21366658169283	0.768423818615097
QSF_ACOXL.2.2	QSF_ACOXL.2.2	ACOXL_MOUSE	grey	0.194045682084215	-0.225663269616548	-0.220415967914619	-0.0111698939479435	0.0999922342717007	0.105437665193178	-0.206209349133997	-0.272080484232537	0.0580909216330594	0.168076653911936	0.107715129683921	0.116372197011434	0.9373574455453	0.480625564299974	0.456927035137262	0.142467404344771	0.0510224010693089	0.682493937232779	0.163955070174333	0.0653387457817273	0.491646199223087	0.304140011114549	-0.200211277091653	0.0277633506515863	-0.0504361299013764	0.0377909394838495	-0.146232665161051	-0.336116709969088	-0.453946187609909	-0.369964192100966	-0.0606242809612565	0.153045263675235	0.0903781690209509	-0.0106609112360818	0.0282290932845924	-0.12596390564349	-0.152408924402859	-0.0299755213912236	0.149296611037242	0.0525747265904399	0.152037067190018	0.231793503095282	0.396941716677407	0.311060654886595	0.245464586763146	0.645370405004238
QSF_ACP1.1.2	QSF_ACP1.1.2	PPAC_CHICK	grey	0.131166316461027	-0.165064456120564	0.0663173976627994	-0.139665632724569	-0.160691800974961	-0.196713667717031	-0.010284080705716	-0.18480809795783	0.132738530887621	0.353991996855947	0.242240809548027	0.640420276031286	0.323391977606703	0.255115970869063	0.162191371388553	0.942316464782854	0.189653379580204	0.348201898119916	-0.0140990615487856	0.0964502125721848	0.18681083178807	-0.116681748569479	-0.147277343582521	0.0122291709095366	-0.355794471872125	0.032881977991189	-0.0282454768158076	0.137997516768754	-0.0290731295632217	-0.380213623967127	0.012594253184879	0.106491488094947	0.127576811788286	0.346868292087873	0.18134602092955	0.0336064087280706	-0.107675979243316	0.0139605653122552	0.0697688210407919	0.131267289030013	0.0356177484981162	0.404584339205037	0.309638629176792	-0.144241374511162	0.920976966765813	0.496381895269684
QSF_ACP5B.1.1	QSF_ACP5B.1.1	PPA5_RAT	grey	-0.0806261148103253	-0.102548056953324	0.0272868298785921	-0.0978014157892342	-0.0698343024355991	-0.340149298240372	0.108417807414261	0.0419084229442416	0.0964284258190662	0.569901766017015	0.469422565598225	0.847726090925262	0.490339883258025	0.622760314875317	0.0136142162456371	0.444232173078963	0.768002115912513	0.496479630795611	0.244418757085706	-0.14591984272852	-0.264893982253656	-0.206915840225812	-0.0601238097219791	0.337022859650927	-0.036980133473101	-0.237854629872111	0.126647797497866	-0.00389436407545634	0.398969583277237	0.280382460998812	-0.171442157597655	-0.145566517916104	0.0764688372223155	0.151486539890051	-0.0448560289029702	-0.0564648057321206	0.263439379272274	-0.163035716869959	-0.148073830516454	0.120566800839038	-0.338229892180601	-0.0932344450370562	-0.292517231265089	-0.271576161922217	0.0807627835288127	0.301977659749269
QSF_ACPL2.1.3	QSF_ACPL2.1.3	PXYP1_DANRE	grey	0.0219634461999214	-0.0788030714502052	0.0134772206483031	-0.205089551160915	0.08071104973398	-0.275021738075915	-0.164573596067186	0.193008188502567	0.0514604634235324	0.877176757219896	0.578683996736967	0.924451935802647	0.144695801810383	0.569494112587989	0.0484689768741901	0.243663625214628	0.170406730085743	0.71712327160471	0.289464059724515	-0.0933668708573104	0.0395114558776467	-0.221152718849656	0.0228438505345271	0.144682517093998	-0.390245165920985	-0.287452920298867	-0.125531353342821	-0.248699246706866	0.164536527096735	-0.127545421245947	0.00691963373715158	0.00290876353886013	0.115604520777695	0.0625061322143979	0.190454850895362	-0.0162947205454627	0.0708002906472485	0.0948588298990975	-0.0140219818706626	0.145826437484659	-0.0370776202882538	0.38327552666456	0.0911823093516042	-0.223697921066984	0.0373970211017407	0.510312115720892
QSF_ACPM.2.2	QSF_ACPM.2.2	ACPM_PONPY	grey	0.0304352361206126	-0.205143809145283	0.0463488847568639	-0.128544244007929	-0.0668365858314579	-0.420977285020432	-0.0528295980179903	0.23536738255356	-0.184027724944305	0.830401993954936	0.144587235033318	0.744214592383997	0.36377879319802	0.637800431994693	0.00188531035578628	0.709923504579882	0.0930179440422279	0.191562792328997	0.255003613548649	-0.150248028849092	-0.0270712079658311	-0.207892853140155	-0.123729039392921	0.0510966855531097	-0.268079325709768	-0.0217128462222466	-0.166140253559817	0.0546013102811577	0.175026872695566	-0.100906747623561	-0.0968185973981827	0.159671447258935	0.100103878224939	0.247740876325897	0.290062990904941	0.149377822003661	0.171580668173832	0.220209936074065	0.242149199894435	0.312858833504189	-0.148616170719744	0.250632298649655	-0.0150119629099095	-0.231985312340089	0.0680842969130732	0.287706773839972
QSF_ACS2L.2.2	QSF_ACS2L.2.2	ACS2L_MOUSE	turquoise	0.0417284372472971	0.12430813742072	0.14720316625605	0.185637523978029	-0.218896176856559	-0.022830565111424	-0.166571476525531	0.118260082806737	-0.0224413581518235	0.768970947040251	0.379932525554785	0.297699471002246	0.187638892441681	0.118975968876895	0.872367234688313	0.237907983052969	0.403722768710405	0.87452543720376	-0.203759954844002	-0.34884797826254	-0.588170852767528	-0.427499443836304	-0.444832187131284	-0.425374305724164	0.206476360291631	0.659393394288024	0.766838086802263	0.273668984430902	0.241436821276591	0.227738486705805	0.00803677267957055	-0.17275067315804	0.318666326026794	-0.0074905518333286	0.155490333167911	0.187622265164793	0.129773179118551	-0.137518557907396	0.222235356087725	-0.155988202573125	0.0326319338023314	-0.204408225035052	-0.0185734800080039	-0.460779992878554	0.14737520201073	0.011257488323118
QSF_ACSBG2.1.1	QSF_ACSBG2.1.1	ACBG2_XENLA	lightcyan	-0.0762808452946765	0.243342849785504	0.103776091692443	0.496176015752337	0.107494949923854	0.141902572030849	0.0501846491872093	0.0829463116846672	0.022220738363716	0.590935044174168	0.0821491796778977	0.464089921020353	0.000183441885780836	0.448142365559645	0.315625108782011	0.723854324837624	0.558814579267652	0.87574920531053	-0.0693797605983306	-0.186891434805081	-0.408369327501934	0.122592416828972	-0.13749813107884	-0.280479191609718	0.678944825563781	0.348512330634313	0.476314196042126	0.412303881291617	0.0365020206478294	0.506866034557106	-0.153684017916793	-0.0764533634981873	0.00568188987197542	-0.102109414219176	-0.207716953331239	-0.0865018416488021	0.0887538172864532	-0.165194194429419	0.162036925186825	-0.144434015539798	-0.029916161395356	-0.721218018201181	-0.325464372467026	0.0702201048406722	0.6250312436345	0.184622578644663
QSF_ACSF2.1.4	QSF_ACSF2.1.4	ACSF2_DANRE	grey	0.211415907216439	0.0964492043436948	0.0138950160219995	0.353114571270478	0.134320662856663	0.218184021159358	-0.174684047460269	-0.038213993740067	-0.0980392571805022	0.132440854747659	0.496386417970132	0.922117055150986	0.0102361001798237	0.342434573429292	0.120211193248562	0.215496319547714	0.787956974996567	0.489280340554277	-0.0729711722250328	0.2080680320475	0.365867648082986	0.437642652350079	0.0219984284152857	-0.129445163482496	0.316724784826537	0.11880201422472	-0.190063030234057	-0.226778283603639	-0.570218304353048	-0.243227236474819	4.19940202392721e-05	0.179002692516399	0.02175791188569	0.0792465685037868	-0.0778379741826675	-0.00485183315338109	0.128220293567991	-0.227889128034537	-0.0239257426622808	-0.0100251190071576	-0.208555949343582	-0.0295355262644409	0.446197209006311	0.440454651954218	0.607183908123025	0.138825170213635
QSF_ACSF2.2.4	QSF_ACSF2.2.4	ACSF2_DANRE	grey	-0.126046382872078	-0.0170617372498819	-0.0282737987170243	0.0388484090652947	0.0497350748021879	0.110057085984917	0.120248945697199	-0.165368565142601	0.0953777198545212	0.373252957771961	0.904442133645401	0.84228721319901	0.784520280455569	0.72623120216352	0.43733325762759	0.39580577788282	0.241362162206063	0.501204890547283	0.341883454565888	0.442331928333043	0.390051602741149	0.61925395683979	0.211334339432489	0.359270899619624	0.249248723908872	-0.218640315496134	0.0840782803955843	-0.0995013766284289	-0.27508081607769	0.106367312135245	-0.202897645819972	-0.155850407378934	-0.113487812310317	0.106939145725701	-0.433747893553887	-0.304159145712636	-0.0934639836229268	-0.182467043811665	-0.218298906839535	-0.174303667971172	-0.138781928197551	-0.282371126048027	-0.121328815615876	0.544794583502997	0.0131132992098068	0.00102593497436615
QSF_ACSF2.3.4	QSF_ACSF2.3.4	ACSF2_DANRE	grey	0.165348962296257	0.20522825913173	0.205804924650359	0.297196232050087	-0.26729061519161	0.085106161950031	0.00358699554596768	0.126129281636227	-0.31895858721564	0.241418734070418	0.144418376409375	0.143269242592828	0.0323855224023018	0.0554135596033552	0.548585830814049	0.979865545302419	0.372936173917522	0.0211840166256056	-0.316152606430667	-0.153719779610023	-0.342232806984569	-0.149863755932187	-0.0266328570315179	-0.0907597610993735	0.191976176637947	0.241353481386536	0.282376624962501	0.288922731354622	0.164455409437271	0.174160506287444	-0.0358894644670521	0.0547025588061318	0.130017759220408	-0.0432966129846859	-0.0970509499226942	-0.0153124269406182	0.126257230012399	0.0144427627341915	-0.0604653037273587	-0.0958978672112956	0.0792909391569496	-0.163369941163411	-0.0221390068727292	-0.174268810469963	0.0224126986300679	0.276583941994386
QSF_ACSF2.4.4	QSF_ACSF2.4.4	ACSF2_DANRE	grey60	0.0134878556943935	0.110678451604122	0.165056731844007	0.106789702008317	-0.00938129593140835	0.130533358460663	0.0585631687152905	0.0797971086001177	0.0515451548670178	0.924392493141073	0.434733952004225	0.242263155294987	0.451143268157317	0.947372725830359	0.356339589257603	0.68005105425164	0.573887730587903	0.716677195524827	0.0579299893862776	0.224367545330925	0.146216039275152	0.285863102609828	-0.125132159165641	0.0139268864293104	0.2407215075059	0.16241058398042	0.0690944995388209	-0.000418448714215279	-0.19352225908792	0.0202210419113535	0.0126794383269275	-0.0591241609753479	0.0295605051192139	0.2594085682567	-0.186036560042111	0.0189069725586673	0.102546209078047	-0.70899710598535	-0.00353877145559374	-0.122004328746909	-0.296557088207099	-0.151361313495565	0.14028236480734	0.252091460436622	0.683327161284788	0.109805385461804
QSF_ACSF3.1.1	QSF_ACSF3.1.1	ACSF3_HUMAN	grey	0.129489503127533	-0.198191155967228	0.234641976767689	-0.259613252074297	0.0632373812730835	-0.0236633395125359	0.380883494546613	0.202347954369015	-0.0589391868135549	0.360231895870636	0.15899779838482	0.0940595242744865	0.0630842623157344	0.656050735120555	0.867752506242539	0.00534170064046754	0.150260740982596	0.678108277782515	0.225223216408087	0.205980511190195	0.145914648708227	0.198135383936642	0.114391184428386	0.397415030336626	-0.0829658357317613	-0.231981094673639	0.0275994787754946	0.0152019003126787	0.225698008581232	0.231371842353004	-0.0286341618926562	0.00779987835712272	-0.058243333229461	0.0851014433050869	-0.050211997656213	-0.0115709868191586	0.0692684242082107	-0.00678798871276606	-0.124597432566511	-0.135998578282634	-0.106680687920962	-0.0953579406583388	-0.364513962325404	0.167894804163388	0.108421567516778	0.142920701961708
QSF_ACSL1.2.5	QSF_ACSL1.2.5	.	lightcyan	0.072556255907763	0.206297625926647	0.313117194934675	0.464955492161921	-0.119068552026962	0.180557978170036	-0.048187603061297	0.199320452476676	-0.107492295114591	0.609234513024203	0.142292826077166	0.0238089343577173	0.000515064886514813	0.400493498637635	0.200218576074443	0.734432041460771	0.15658812812285	0.448153641390455	-0.295394183934601	-0.105910668438899	-0.502799450660514	-0.0712161780193209	-0.0847804158192104	-0.242679225448493	0.478595881759366	0.15136015579213	0.415626636183942	0.268583274727644	0.203947152112685	0.532169142425331	-0.0664172782768596	-0.0233804751728352	0.148025440638522	0.203245750595411	-0.0233883490537184	-0.0233258656324163	-0.0652431630783779	-0.281964969565551	0.196978624576527	-0.0861865901802177	0.196951835379932	-0.553179934834306	-0.355060355568931	-0.129420113212894	0.033500578948702	0.454899033560312
QSF_ACSL1.3.5	QSF_ACSL1.3.5	ACSL1_CAVPO	lightcyan	0.0235691858167378	0.213092068968914	0.43239347108659	0.495492844319507	-0.131644385061614	0.299906188596224	-0.0187879410750737	0.051358420294855	0.00576309492943793	0.8682740325776	0.129328502914616	0.00136846396347881	0.000187834792459076	0.352225174079076	0.0307668393510625	0.894826148327071	0.717660864574946	0.96765597040731	-0.333142160955687	-0.0417456034572042	-0.497301156951581	0.0134354625808997	-0.115561016730227	-0.287474996594074	0.610642822032917	0.317207040857357	0.43985326723206	0.206372896763157	0.177016000462459	0.601638727468651	-0.121049293198947	-0.043700201964215	0.145978177056238	0.0979704920277968	-0.0704820647245011	0.0204251506062407	-0.0740715281094055	-0.255988998020273	0.20270913056332	-0.221631435429389	0.125709319890604	-0.678694444623897	-0.374374736086219	-0.0312118297919604	0.0158086034650284	0.768878529254654
QSF_ACSL1.4.5	QSF_ACSL1.4.5	ACSL1_CAVPO	grey	0.130781053132667	-0.36378116226135	-0.0224908279856086	-0.625596823662182	0.0599129505460034	-0.476325599141157	0.0928490492504607	0.432755342297929	-0.120568368954071	0.355419778009978	0.00802538479753897	0.874251070079899	7.08976142469208e-07	0.673086784680397	0.000357691067694134	0.512670862324993	0.00135438937463454	0.394542793759199	0.337097147970381	0.0648927032196564	-0.0288125384987072	-0.282846566337764	0.254843842741872	0.549652142609835	-0.558879320456071	-0.298221242230138	-0.129417456780736	0.262262761980837	0.521002558738385	-0.0322222567863771	0.191688949601213	-0.105114806462528	0.0190432737815691	0.0793270738132431	0.138579251762837	0.0659643309419969	0.0382545220444176	-0.013264305175715	-0.479627884895346	-0.0471796311222225	-0.0470250980492761	0.347407991172651	-0.314238112067906	-0.31786362897547	0.0145356838491206	0.647631618310413
QSF_ACSL1.5.5	QSF_ACSL1.5.5	ACSL1_CAVPO	lightcyan	0.0880225277614924	0.195119839856197	0.390975152879435	0.488430065646833	0.0441218841494665	0.244629201899722	-0.0523430192322405	0.094914714720366	-0.0482495771096684	0.534918216735116	0.165688762391916	0.00415872667847925	0.000239205282605287	0.7561165997057	0.0804937744639415	0.712479403558585	0.503294435711912	0.734103037282438	-0.184013557156826	-0.16484165318434	-0.530066457712484	-0.0608935258863433	-0.112297604900236	-0.291267540457149	0.527059103458337	0.153794871310162	0.392882104787452	0.199932780669766	0.223816312000041	0.60911775085034	-0.0853808099688929	0.0606827680778615	0.191161156105889	0.133598450453078	-0.0475754876803959	-0.0965273502554228	-0.138002330129493	-0.302291226652773	0.231945907530702	-0.151172782315655	0.173993807816781	-0.585617453454181	-0.386042942582193	-0.116230681332729	0.191597584256135	0.242885926192093
QSF_ACSL3B.1.2	QSF_ACSL3B.1.2	ACSL3_HUMAN	grey	-0.0705084587967562	-0.069727365749466	-0.0491325482824665	-0.00765445052036233	0.0176300081026152	0.0204304251851922	-0.000452495149272831	-0.28734316729703	0.0665056685356253	0.619398576821489	0.623294267541764	0.729420738701983	0.957049895391102	0.901274957022189	0.885690403499719	0.997459805610274	0.038878317401239	0.639469749337062	-0.00412071726960108	-0.159142455869585	0.126066403956159	0.165521964925005	0.214941305768433	0.269531630089913	0.110566191177015	-0.149249660907848	-0.246399202122988	-0.119896386514833	-0.270298569803097	-0.130389433045629	-0.483417433114959	0.0210988705185395	-0.050225383284185	-0.132584782002952	-0.159479668475227	-0.156583652614711	0.200997593153452	0.13190199569075	0.216268509103021	0.0170932019810516	0.224135752286986	-0.0389170678695505	-0.0026717374927351	0.241843203205487	0.97687042989078	0.259786655494451
QSF_ACSL3B.2.2	QSF_ACSL3B.2.2	ACSL4_RAT	grey	-0.107339970453057	0.0706488074310819	0.155846101676772	0.241661331263191	0.306446444885966	-0.00161269640578894	-0.0610796933222166	0.154917848278735	-0.177394372748653	0.448800874975868	0.618699682864325	0.269913877606188	0.0843533537192895	0.0271358580145568	0.99094689999187	0.667088715079289	0.272812440911139	0.20834874682497	-0.00542361687078916	-0.0198378834013903	-0.244519544137822	-0.00810430692330536	0.393529090316963	-0.0364046659058509	0.185560875919953	-0.0318480570654618	0.0865056250216628	0.28547635282785	0.170769122932368	0.225520376244367	-0.252722716851962	-0.0490145798573839	-0.0200423299114941	-0.127628847832696	-0.070104300963879	-0.0702397983203801	0.0746589603504841	-0.0506741887407789	-0.220836157307306	-0.274860077685404	-0.0772268597088178	-0.316142275116829	-0.395969915098886	0.00842202807488756	0.969560287425588	0.888984575062935
QSF_ACSL4.10.57	QSF_ACSL4.10.57	.	grey	-0.0863305323063992	-0.0506069592448088	-0.19703125737291	0.153530124083253	-0.151666330598631	0.24281059150324	0.0166570515323832	-0.102410131525018	-0.00643196501999035	0.542827481112031	0.72162394156467	0.161500976492356	0.277184118595481	0.28312796249428	0.0828419220529549	0.906698493724897	0.470023540780094	0.963904447619823	0.00198611579470091	0.257035911198408	0.285535986742559	0.395586832630377	0.0854554826604607	-0.0341161869774191	0.243910445876124	0.0866825623700482	-0.191250695551534	-0.202867532260944	-0.388999918315139	-0.0743817297036238	-0.103707210132756	-0.0500057493408925	0.0531270923808646	-0.105315646226006	-0.111256037010913	-0.122829485447535	-0.190542833716417	-0.0648874303642434	-0.0553595460406106	-0.0130701176639246	-0.0165282601093325	-0.146352891888772	0.0949184042130054	0.421930478200865	0.988850777151751	0.065842281818582
QSF_ACSL4.13.57	QSF_ACSL4.13.57	.	grey	0.0434229108055334	-0.208412943338769	-0.244011150718658	-0.256783225098914	0.0164307303463193	0.0630975608110585	-0.271870157421437	-0.0861415347086455	-0.0703354109418639	0.759863947226151	0.13815700870761	0.0812858345623986	0.0661177884515783	0.907960686572759	0.656763837477217	0.0512091006600228	0.543714448400607	0.620260762393222	0.16164940156557	0.0121264077283002	0.349544463870845	0.0425183276705084	-0.0363329615531953	0.0793094359287548	-0.293904196391345	-0.00234823222435141	0.00469587329213134	-0.473774147857135	-0.244527644635295	-0.344606634449567	-0.0394246842987482	-0.0363728844295662	0.187290925288336	0.0113713721723317	0.194575531805533	0.247371606533991	0.0649536104298274	0.246737431753003	0.00481558434471356	0.130184928352807	0.19620331502699	0.388361095547635	0.272112497392995	0.0653377675719667	0.252257653036678	0.932005275714777
QSF_ACSL4.17.57	QSF_ACSL4.17.57	.	grey	0.00218477802337202	0.125803279502629	0.139564596911165	0.0944785736389251	0.0520481925873781	0.340267752204858	0.358200955755448	-0.340297014774377	0.211238043249268	0.987735651839542	0.374182867988232	0.323745610316895	0.505266815948826	0.714029594654703	0.0135794865300171	0.00912383455657269	0.0135709186855899	0.132774390777654	-0.12451489662089	0.211855575082735	0.393115260135363	0.459680804383004	0.187904901137153	0.14690593425076	0.156505962668011	-0.145105532819971	-0.16407321006158	-0.19617592374488	-0.37036904061918	-0.0895656449296713	-0.0264188777493998	0.105094805100363	-0.182037850523262	0.0466186781860779	-0.244284621216943	-0.122574885051218	-0.172931329016825	0.0670555371072467	0.0370274829273821	-0.0189940277074785	0.0809347636180167	-0.130339916610676	0.0186772407616013	0.480571502843042	0.379134298603132	0.131619076330918
QSF_ACSL4.18.57	QSF_ACSL4.18.57	.	grey	-0.199992073560578	0.0906607432302048	-0.143348241570015	0.0662792408893296	0.188827396283081	0.16567555378046	-0.120080207874296	-0.0630726006340704	0.0362122057345387	0.155167830164944	0.522699371155881	0.31066934775246	0.64061298864609	0.180034160939473	0.240477403874657	0.396473913832874	0.656891169508481	0.798826849598439	0.243716825983317	0.133681436100225	0.276205091036327	0.406251526343674	0.0402840511801985	0.136483018575037	0.289902001664116	-0.0257726026912331	-0.222886042786511	-0.278342848627369	-0.382531758643418	-0.00956359949220619	-0.0963908868738529	0.0107303214355985	-0.199751365992623	-0.178001567591523	-0.370444317900994	-0.103555652853107	0.0292221005118557	-0.125632565778763	0.057860334693014	-0.0395155967937994	-0.15911475699524	-0.16309998093224	0.164658084548092	0.420467304762914	0.0816651742246812	0.34475756886375
QSF_ACSL4.20.57	QSF_ACSL4.20.57	.	grey	0.0953222481544849	0.163338010468906	0.358375723881789	0.330555000275047	-0.20954260812184	0.230781478257876	-0.00492918890365379	-0.216615370367258	-0.145300423674017	0.501454999504193	0.247270278385714	0.00908755334187084	0.0166917275636837	0.135985444520844	0.0997559389465352	0.97233410094769	0.122966308149139	0.304056727987059	-0.277523950264227	0.0368763773425871	-0.107084968073973	0.127806905105898	0.0603048292694682	-0.0469593474753336	0.341455411213087	0.152702156548875	-0.0262185755514167	0.0475157124898009	-0.0428332792191229	0.167045151618379	-0.265739328792846	0.0939667296688775	0.0526014769078766	-0.245993578750432	-0.214570852782246	-0.113334537927712	0.0834500470238574	-0.0921746224157553	0.0212169350838911	-0.35725217663797	-0.114264046900416	-0.270932174408698	0.022917278658307	0.137994252409556	0.0463795080411857	0.79521604051548
QSF_ACSL4.22.57	QSF_ACSL4.22.57	.	lightcyan	0.0805981504376333	-0.0826294458141451	0.108674698998211	-0.278622297169983	-0.0451679334256677	-0.216461032865288	0.0199294857621097	0.177521298840955	-0.0052854285944416	0.570036013267508	0.560322731706273	0.443147080532601	0.0454858519704192	0.750518903056963	0.12323994278009	0.888475198795588	0.208018157016159	0.970335509402359	-0.019011899241756	0.0596822240917571	0.304606180420885	-0.100102247695976	0.0763880420719753	-0.00185782413274522	-0.443683547595294	-0.0639306314695368	-0.311885195826925	-0.161245699912192	-0.14242023823271	-0.491894302919171	0.0914585400118088	0.170989842430981	-0.0213347559511336	0.164840703575737	0.23901760400826	0.158346493243913	0.0808839634358415	0.0115499158306575	-0.0257967312185104	0.302558790150146	0.0657752954806219	0.541639228521758	0.387173191553887	-0.060011502023072	0.89357963553665	0.67427532521108
QSF_ACSL4.24.57	QSF_ACSL4.24.57	.	grey	0.117921873975119	0.0376317489992062	-0.0876455419042366	-0.0865126068648582	-0.060517529587256	0.108460282017296	-0.13724484421997	-0.121324459275517	-0.212021007438502	0.405078148266029	0.791114584147589	0.536675552958638	0.541973665317862	0.66997617775397	0.444052661852462	0.331932047055624	0.391562685094934	0.131310862717292	-0.451519502449624	-0.219606239391925	0.15300204782123	0.00489499241404358	-0.158519213660351	0.0411354810428593	-0.110621303059157	0.0831465985456536	-0.0403203240954389	-0.0990497303266319	-0.299617374095946	-0.317666036355728	0.158164548408194	-0.0730479851034696	-0.15877620441082	-0.0321107685240904	0.123540301412327	0.383196210859105	0.180880525908626	0.142474849955579	0.272612531227555	0.0202503877563646	0.366951393780133	0.209979346398697	0.214665060748193	0.0670050987433528	0.000779939587898681	0.117754002335308
QSF_ACSL4.28.57	QSF_ACSL4.28.57	.	grey	0.103299875355788	-0.213369228023967	-0.236334825633433	-0.253368042971615	0.22538826235985	-0.039682511876723	-0.0720134104015837	0.0393660061313795	0.147742465949926	0.46615396156576	0.128819216315382	0.0916428259800958	0.0699324967498558	0.108156196188269	0.780008059913565	0.611921870660462	0.781719414286673	0.295913397545244	0.0616215226508738	-0.0151442646774831	0.134616443072436	-0.250596428704049	-0.0627074533776399	-0.0543864847067453	-0.466247609566239	-0.109310928091812	-0.145232426238174	0.0561427473739651	0.145674075909383	-0.254109810316414	0.139945331880801	0.060862729456252	-0.0838270902490483	0.162520383469881	0.311886273977889	0.0159005611679342	-0.246647678265274	0.26518813996876	-0.082094878141968	0.167877579236757	-0.00604219859390527	0.400827223589055	0.0490018455967129	-0.236645556340524	0.664310213405532	0.915139493833681
QSF_ACSL4.29.57	QSF_ACSL4.29.57	.	grey	-0.109313191066962	-0.0726442594591959	-0.137246995047355	0.0181431128935047	0.00404133586902402	-0.11653586983213	0.00423007334511442	-0.00482705444516542	0.0390550320916772	0.440456506103298	0.608799331190355	0.331924397202182	0.898416547798162	0.97731587981801	0.410660075401737	0.976256788104884	0.972907131775264	0.783401857295822	0.230018052518966	0.0371242985032869	0.10854382188188	0.266629523041039	0.000931942201236758	0.127427206419536	0.28753551137854	0.061057963770993	-0.0317276009589532	-0.183303560754935	-0.278444067908544	0.0438566400461848	-0.224007786475031	-0.134589585594275	0.000378352635819063	0.0464069439918042	-0.113853199359355	-0.0690465201706475	0.139239072588015	-0.298589992734708	0.0618850857792133	0.0692288406221436	-0.149566727406636	-0.200343499319462	0.0256417417959406	0.256348183371055	0.100913371581985	0.793869287161918
QSF_ACSL4.32.57	QSF_ACSL4.32.57	.	grey	0.0301410413425348	0.334389616278498	0.113411316499512	0.183518313140809	-0.0279139672393087	0.0193149535864977	0.0522862321549202	-0.0691270204848229	-0.0543752761614454	0.832017551424317	0.015397225249107	0.423405016713235	0.192816591826169	0.844269301307827	0.891893293236476	0.712777899261595	0.626295450784174	0.701825460968811	-0.215770841114348	-0.0909352256194222	-0.0443825971663392	0.147207162980313	-0.255688692949961	-0.0858846735768627	0.293045796088297	0.185306843014985	0.239990832465582	0.239122246159135	-0.100801278414085	0.0946609067361278	-0.0666294751887251	-0.187997135705502	0.00880466926533191	-0.334229341009451	-0.267982952351209	0.00905954718361962	0.138336549652351	0.127096002764705	0.0670587564832248	0.139065255377995	-0.0818764976564501	-0.192537268706926	0.191122565159907	0.104939485960082	0.124469270291366	0.521436144215624
QSF_ACSL4.33.57	QSF_ACSL4.33.57	.	grey	-0.0112965173250154	-0.00975795519984645	-0.107300173936903	-0.106429650888539	-0.0642749501358142	0.142200184092257	0.0248191322478409	0.0535244156693339	-0.126255752625247	0.93664876208452	0.9452628946458	0.448970056681172	0.452679563922414	0.65076852872158	0.314600801132201	0.861355072732539	0.70627925449748	0.37245319722619	0.378549322881185	0.580235265875354	0.522848155613273	0.446871809383993	0.109983755483444	0.117971864493996	-0.0963123382464661	-0.235949199710799	-0.157998485432361	-0.243151916900864	-0.268356970684462	-0.209366877173534	-0.0257651440627596	0.017916638618302	0.129805850649587	0.0478136856091031	-0.135506178546768	-0.111991627096407	-0.0762396721285565	-0.213524792269767	-0.228838733551366	0.0120521561503704	-0.197066451994186	0.172566444942332	0.213572582964558	0.403175261714158	0.00565398251662698	6.52676441025883e-06
QSF_ACSL4.38.57	QSF_ACSL4.38.57	.	grey	0.169692894528708	0.31532624044153	0.041485368627657	0.451367559565091	-0.145503524355206	0.246555784531813	-0.0791515354880797	-0.0495128806585866	-0.197760372089975	0.22910317095465	0.0227857963769168	0.770279897520188	0.000783532528317239	0.30337401114393	0.0780637218401041	0.577000566865313	0.727406877583652	0.159924128760862	-0.266409554025304	0.127798571580768	0.0998145513688858	0.401439367871011	-0.172465424942735	-0.086291796511115	0.55566557721834	0.363060456647375	0.2188301973368	0.230281324991854	-0.452733104650334	-0.010726561192902	-0.169011131810738	-0.199667268292699	0.0711907784319906	-0.131730253468048	-0.288730364862623	-0.153909405940819	0.056649222808066	-0.171808917165505	0.122786380144535	0.0678828156094558	0.0912163668662259	-0.299705284327364	0.340136464065301	0.347930918449327	0.0562535879764924	0.366591668165144
QSF_ACSL4.39.57	QSF_ACSL4.39.57	.	floralwhite	0.110088193487374	-0.128916875348255	0.127479235228453	0.0730993581136285	-0.156168961685004	-0.352616704532907	-0.148661236464314	0.322893489787499	-0.174781189295928	0.437202922385046	0.362378047022897	0.367800300592567	0.60655099088531	0.268910534119834	0.0103510073845258	0.292886628800025	0.0195571729854333	0.21523721857923	0.00703555648017785	-0.301841511681848	-0.558457324487311	-0.597726733996026	-0.194903396006224	-0.165578205923926	-0.158896130295175	0.214181705288531	0.325713014351093	0.28602643222792	0.527291318601314	0.201563351615276	-0.0362763033980728	-0.0133338072658731	0.839883118187739	0.288316546224135	0.409392667205683	0.117779342469078	0.0175620641831593	-0.191656995995082	0.0298487149134973	0.273392873697747	0.10555113050904	0.13926054989504	-0.108931592807151	-0.642467964371376	0.960519718815448	0.0296525511251459
QSF_ACSL4.43.57	QSF_ACSL4.43.57	.	grey	0.0283900104988017	-0.148010906456872	0.0568083693458138	-0.0594857468729657	-0.264024055771202	-0.240465550510159	0.0210901373687922	-0.070516379241365	-0.0481709198214544	0.841647281001683	0.295026964009832	0.689144674162065	0.675288059598527	0.058579675391559	0.0859488458660998	0.882025060082363	0.619359126501494	0.734520616540264	-0.0692329777814386	-0.213021092311344	-0.166194236289033	-0.332019945919086	-0.391993046195126	-0.037181691744882	-0.193009285833582	0.274821032381161	0.0920024711974512	0.238928729634789	0.217284690181515	-0.00875620990712018	0.0915646136444243	-0.0470277465426448	0.218494513310063	0.105332322804219	0.293284177549763	0.0480707781124696	-0.0290645496888681	0.0481798696877969	0.139934014167046	0.224265655782202	0.123903398633893	0.236237172747727	0.111907957976718	-0.353081168139863	0.625765322010204	0.129459167794503
QSF_ACSL4.47.57	QSF_ACSL4.47.57	.	grey	-0.0373736861971163	-0.319144984042898	-0.147787742136721	-0.302540463900367	0.384033544500869	-0.372113707598268	-0.350446415336866	0.12179061778889	0.0341723217288557	0.792515168301364	0.0211044529660427	0.295763767264878	0.0292584813360183	0.00494425430492326	0.0065990993058552	0.0108650011077705	0.389731954695748	0.809942602253448	0.501125434810018	-0.0248590516336488	0.213730125667161	0.0317713543578782	0.151954199885288	0.162183207173593	-0.188270756560161	-0.335868055284928	-0.364513839132441	-0.185704296970774	-0.0653209180864419	-0.13673170584685	-0.113977029486228	0.201313095115062	-0.085453446703869	-0.124579485667092	0.135451891201184	-0.141178379408726	-0.0604756347638652	0.0477365708606865	-0.22035560733511	0.134339856282399	-0.333545651325658	0.173661685108953	-0.0614073953009805	0.0642000817999718	0.000154308544687715	0.861134269833436
QSF_ACSL4.48.57	QSF_ACSL4.48.57	.	grey	-0.167488258902063	0.11888667832395	-0.37745525101215	-0.128342755220128	-0.0130740688676535	0.277729951591991	0.296805579209898	-0.144356456969956	0.159528714694629	0.235298263498879	0.401218641933072	0.00580577040026031	0.364537568845094	0.926705578313895	0.0462108145812806	0.0326245930734083	0.30724281928298	0.258616897252575	-0.01703330725652	0.378734295823294	0.422199763461708	0.383286820346187	-0.00501982829634862	0.244250284853124	0.0459032779626562	-0.0025767837025368	-0.096752162748555	-0.272768819415451	-0.400021318468962	-0.210186298818333	0.0435446598715951	-0.296206217569021	-0.156230957268426	0.0154724792265719	-0.392381088418465	-0.0400145963912863	-0.0043245781651014	-0.127019909651312	0.084445628491908	0.250015586832912	0.0159735525696412	0.0552786604502378	0.309742973627872	0.389815836185048	0.904600623301148	0.00562866590889342
QSF_ACSL4.52.57	QSF_ACSL4.52.57	.	grey	-0.190347345558789	0.137587278517636	-0.104581182502635	-0.0166919606497513	0.229925063634642	-0.0194896224540911	-0.143346207891313	-0.0357352143860709	-0.145776450653237	0.176489739109139	0.330715501563207	0.460611705781025	0.90650382589862	0.101055058201626	0.890921565219055	0.310676284043564	0.801422622792657	0.302458134518407	0.0266442159893628	-0.0157552525787386	0.0789562111843333	0.140432399161871	-0.0887632110340793	0.0272404024272529	0.155393477924798	0.0400232776488387	-0.00875788939987256	-0.0884786054663456	-0.152002825743574	0.0390434504364451	-0.164904624148127	-0.119112762971694	-0.186174112073477	-0.589086120289718	-0.121144875827245	0.114334872246989	0.260138717525956	0.391799759429093	0.000317780931104461	-0.127992891969689	-0.0247454729823113	-0.088780592360873	0.0897886801404692	0.166529743109823	0.85127113563469	0.911729152929194
QSF_ACSL4.55.57	QSF_ACSL4.55.57	ACSL4_MOUSE	grey	-0.22599686522117	0.15906297896928	0.0547423829456382	-0.0334076395446707	0.125533465721453	-0.31749112882316	-0.222225185253869	0.42052390860489	-0.227055673797551	0.107181952105311	0.260027785696711	0.69990690803272	0.814119239493035	0.375216575112541	0.0218192949900044	0.11332942428038	0.00190901957225489	0.105503106120017	-0.0190489110455893	-0.392220928646508	-0.609513240109895	-0.442305499851248	0.00217964352771214	-0.0268866752680127	0.0943242164140796	0.0395541928766044	0.176826080184913	0.297907029327456	0.455260201213586	0.400235241195992	-0.0621163753205211	-0.121805981012259	0.0281519185799384	-0.183990771886119	0.111835843019851	0.29131195974553	0.431687875524114	-0.0352054072845685	0.0302369344880436	-0.0299787254962179	0.129186485687646	-0.197907318026957	-0.360104369109735	-0.442379788942105	0.893373658634114	0.00403001700469466
QSF_ACSL4.6.57	QSF_ACSL4.6.57	.	grey	-0.297925980916504	0.106534497478676	-0.00439713372953685	-0.066577486351847	0.200685710822253	-0.350411164682909	-0.0889100036822685	0.34880606008795	-0.0958779133954203	0.0319428302804611	0.452231900412919	0.975319370204081	0.639107312455027	0.153710952769739	0.0108735278644542	0.530792350506557	0.0112679432067674	0.498952531677785	0.100139283420264	-0.318768979147046	-0.569888093947372	-0.412969613503361	-0.0595599789189815	0.100826393070756	0.0846893476748931	-0.0940533368461308	0.153416888436613	0.2668997136086	0.556071175595943	0.531451250030826	-0.172380843804683	-0.180767259851448	0.0494044501984208	-0.219552545826801	-0.000328732205275441	0.257417601752473	0.458621387540909	-0.0787162750306034	-0.0445761203378273	0.0371491552842959	0.0279274971664818	-0.246270447690605	-0.47308601687677	-0.44096048880125	0.479977195067971	0.0212652107612908
QSF_ACSL4.8.57	QSF_ACSL4.8.57	.	grey	-0.160522627702064	0.0298005756494415	0.0332191128921611	0.174949278829708	-0.0196476904522066	-0.00284923068161506	0.0501361184541323	-0.0108529592551962	-0.0749455659026378	0.255623192126764	0.833888062460886	0.815149750694374	0.21478939707519	0.890042328992064	0.98400614539273	0.724110780582437	0.939131469749638	0.59746727213495	0.017178711611352	-0.0424328536569273	0.0654270339899764	0.306028208605454	-0.103915542908966	0.0803459671719786	0.336460066448621	-0.025287570152497	-0.0468716837952203	-0.0179550077271762	-0.15642865523442	0.216155162422941	-0.224983058313003	-0.045517734738747	-0.0480850430657333	-0.370344173149146	-0.216069035141472	-0.087848044444426	0.0351705553279832	0.0253002319002395	0.0768501269955792	0.0553738572971421	-0.141304221056099	-0.33083177192018	-0.106182995152315	0.312520830573218	0.903790071577768	0.765181206515227
QSF_ACSS3.1.1	QSF_ACSS3.1.1	ACSS3_BOVIN	grey	0.286488390204105	0.102767993398402	0.0240148190394648	0.171733175114323	-0.224124620626305	0.191172599233863	-0.101144125202249	-0.036512743656854	-0.213590841508499	0.0394888257851626	0.468465100980477	0.865806122207193	0.22347104857111	0.1102007068429	0.174586560004031	0.475559049903723	0.797192435369806	0.128413084275773	-0.191565019056735	0.177770575134914	0.246123712963203	0.25775768349047	-0.244729316207917	-0.0900049350251335	0.175356131661005	0.358084873212849	0.0128878019207807	-0.0132429842784791	-0.352259317000706	-0.261117640197095	0.00788404127492774	0.062063719505734	0.133792585214107	-0.11908579803028	-0.0786193061842055	-0.0311581042951205	-0.030682845992587	-0.0729434843927714	0.118322713164958	0.0215207282791356	0.0376572467977619	0.0875504622080257	0.543043996649517	0.217204491407983	0.173686801552667	0.207369969479798
QSF_ACT.2.2	QSF_ACT.2.2	ACT_OXYRB	orangered4	-0.07829445322643	0.0904573180390987	-0.0872273139002855	-0.330188562030827	-0.0562164466196532	-0.192853219784265	0.0139296558330386	0.148163838500039	-0.0145565165562798	0.581145140094506	0.523636559941251	0.538628429937342	0.0168201431235791	0.692222028949642	0.170756774219917	0.921923496923246	0.294522730006282	0.91842154836862	-0.177839402560795	-0.205567813177487	-0.16407086077848	-0.335219137411341	-0.124429909934845	0.0544358036419232	-0.236029663639914	0.0616540020040729	0.171129856625342	-0.11195764376223	0.181255538893175	0.0132833744266634	0.289353612485022	-0.235278122807952	0.0811755028215649	-0.042359737005388	0.227359717088858	0.720407042222723	0.39816416178376	0.184267077785522	-0.0352329807386864	0.0707969193211338	0.284998440056561	0.240281097835499	0.0650688592036696	-0.316409452544771	0.20719124966367	0.143740913566571
QSF_ACT1.4.5	QSF_ACT1.4.5	ACT1_ABSGL	lightcyan1	0.159945191193145	-0.142402221961468	0.128376598832957	-0.13533036971562	-0.0202080887118691	-0.44847323761087	-0.1301186404924	0.529539592781808	-0.272486156399818	0.257359598432817	0.313906645333015	0.364410052060615	0.338785051466992	0.886926237453336	0.000854878714142771	0.357882893154982	5.4217290412021e-05	0.0506638613514293	-0.191236880731509	-0.476288659788331	-0.691701568023326	-0.784406776202373	-0.282807454521084	-0.212313229689927	-0.223324644960677	0.307888192946604	0.245524275921778	0.281886938635494	0.601787098994952	0.183109706533994	0.201130685865876	-0.138217615995283	0.394254729066326	0.111787322584311	0.508783524291668	0.585878632580483	0.435840378551107	-0.126420048943005	0.0789089447096443	0.169770557671384	0.0928581587235297	0.202390927864841	-0.0713453436503339	-0.795183676448917	0.174438941781596	0.000358122412054386
QSF_ACT10.1.1	QSF_ACT10.1.1	ACT10_SOLTU	grey60	0.111759777982308	-0.00778537656044785	0.107243668433053	-0.189279732147448	0.0284342796199805	-0.182839732566665	-0.0513320117444368	0.454830863475841	-0.205628109311188	0.43023122189048	0.956315958782097	0.4492103313838	0.178974026334399	0.841403535159776	0.194495827518066	0.717800014621207	0.000705229492664992	0.143620860924213	-0.132369971337945	-0.304173312854828	-0.375844142693211	-0.469701806887103	-0.15753208867226	-0.106242271231114	-0.186383162676332	0.221406381354917	0.177519774715127	-0.00369768394283136	0.273774819159111	0.0297358619270768	0.140959540219925	-0.0230935873787736	0.321904276513275	0.0383280548699159	0.216049589357201	0.311587324573409	0.277819402452894	-0.484355694448589	-0.00565529154188587	0.0919868074164833	0.190752778673635	0.249688628163946	0.135142303788908	-0.450225474296907	0.3495539504003	0.028354877930242
QSF_ACT2.3.4	QSF_ACT2.3.4	ACT2_XENLA	lightcyan1	0.0624846278056417	-0.0530953453927471	-0.0508505337164165	-0.279099572740013	-0.220570209875271	-0.264865943680526	-0.107615871865563	0.278327506844214	-0.17064684857088	0.659893445857299	0.708528920719403	0.720338571724201	0.0451019327904262	0.116110388735128	0.0577500693090527	0.447628936771456	0.0457243115523938	0.226457741721972	-0.190220769766832	-0.386806466040271	-0.389097190997815	-0.626789969242537	-0.307834144764979	-0.262430258156256	-0.359151830349845	0.20547671714555	0.0617651476889433	0.0497978980066429	0.405442634580862	-0.00722027539197548	0.177754928990209	-0.0313306935355991	0.30022527369972	-0.0166747274495239	0.391323973597679	0.535116369744987	0.311638754913196	-0.0748370965227129	0.0368398967099829	0.250001916740592	0.192001117715868	0.394947117105064	0.165812671092299	-0.611593309134523	0.176782965979921	0.00461609600476561
QSF_ACT3.2.2	QSF_ACT3.2.2	ACT23_DICDI	orangered4	0.0398682173044334	-0.018398647449147	-0.00495585479078131	-0.314987039386511	0.0842639781709598	-0.0163082664341116	0.0254001507430482	0.22738496503997	-0.0353246384980817	0.779004426470537	0.896993487653668	0.972184492833548	0.0229404502977207	0.552563614881303	0.908643761756859	0.858142376580235	0.104985127749061	0.803658669647792	-0.190323465868782	0.00441872901957638	-0.046436583299722	-0.187666674129209	0.0857914329439537	-0.015674852945787	-0.194179770046311	0.0305071019878998	-0.00794606366893216	-0.14208213147469	0.14393708571315	0.00333646442474293	0.395501981037638	-0.0903660723530632	-0.0246748688336703	-0.0117897836503024	0.23452372189447	0.832210426610068	0.356987772043774	0.22690522963203	-0.0995962808789971	-0.0142895734081124	0.109649870740097	0.164749429913153	-0.0265857003416874	-0.168943676376053	0.17654503214337	0.975198195977584
QSF_ACTA.1.1	QSF_ACTA.1.1	ACTC_TAKRU	green	0.381966825436139	-0.0770158579584662	0.189679926781217	-0.134915980448694	-0.0959904964287943	-0.230116407467072	-0.0221516367394114	0.395540685130843	-0.166901111561754	0.00520196933210396	0.587352987757516	0.178039854182134	0.340279896674372	0.498446293195068	0.100763675773261	0.876132568324157	0.00370399078938851	0.236967369349943	-0.159153974462816	-0.0840700916764671	-0.161787845547737	-0.242106391151008	-0.193109485619258	-0.0980798150745178	-0.145404570747189	0.163912181514101	0.0163827620773428	0.18633957685635	0.1824118331519	-0.0227698997358279	0.656360705582724	0.244727215387834	-0.0283052282329609	0.207357691129334	0.226784732730979	0.184870813784025	-0.06418555212649	-0.38682556569075	-0.133787455292372	-0.141061859543659	-0.0847549077306046	0.157194164198107	0.10105567947634	-0.262038515814364	0.259751720933724	0.553481314491105
QSF_ACTA2.1.1	QSF_ACTA2.1.1	ACT2_XENTR	grey	0.125338320136901	-0.00537825688120584	0.101987799950518	-0.0170979853858849	-0.0979940411431295	-0.190454677287467	-0.369693103463122	0.329007277922945	-0.2811181513976	0.37596527941198	0.969814749248323	0.471866304357487	0.904240065276771	0.48948167818427	0.176241368771937	0.00698867822847647	0.0172398544443651	0.0435073753470612	-0.31944180664062	-0.168948172917304	-0.321243640807186	-0.38964745422529	-0.158610755524633	-0.32477987335204	-0.08838477098241	0.213583810808099	0.104717585704267	0.122566783758266	0.167954747884487	-0.0111195435458647	0.196195070165306	0.0578859737879243	0.156928672619723	-0.027414813565859	0.351968239847864	0.539370466303441	0.311342882043888	0.0451652774393067	0.0110915249347007	0.0911901759176383	0.0556577850317935	0.105944228268468	0.0425184871287285	-0.37695217801684	0.0209782750000346	0.23118314110289
QSF_ACTB.12.31	QSF_ACTB.12.31	ACTB_SALSA	green	0.26387322620597	-0.145678691253063	-0.153421954155912	-0.165127552428473	-0.163279423328978	-0.162267337119443	-0.0806232854398224	0.301689240832323	-0.0809789799665284	0.058729313212508	0.302785986917198	0.277526813985299	0.242058329351124	0.247442188518723	0.250424727251235	0.569915348178239	0.0297389859805918	0.568209040435601	-0.254868425110058	-0.0193332164553927	-0.156290283295514	-0.303032751075504	-0.11675616685587	-0.0252020607542918	-0.258126311234527	0.179880044608703	0.0719146957029212	0.23558771494408	0.207090427150136	-0.101321439511004	0.570276080271796	0.00575485331381544	0.168661596535221	0.222254432651341	0.228007393706261	0.291336005220512	-0.00323094903024292	-0.362991475308032	-0.166706102530256	-0.0404577844240767	0.396662115303392	0.24387657766312	0.0787133540452134	-0.313695161180862	0.0682355683730692	0.891791684786674
QSF_ACTB.15.31	QSF_ACTB.15.31	ACTM_LYTPI	grey	0.19384308184693	-0.291132063855767	-0.00600282906506341	-0.00737514163963646	-0.0438688543614658	-0.380169191197504	-0.16045412125777	0.095821396407511	-0.0609322015472	0.168529835492248	0.0362650267514066	0.966311278402126	0.958615744044145	0.757472510052819	0.0054356212550434	0.255828783730223	0.499206764608942	0.66784582224921	0.00818733559343074	-0.30655808650196	-0.259960095371804	-0.344543646313935	-0.213111732146834	-0.0856394289618861	-0.0874792942224182	0.100679044394404	-0.137105141076641	0.205895032371491	0.23612858986245	0.0481353119160148	-0.104938094574488	0.0403329804651564	0.324727060441588	0.0263673080619385	0.387749166554197	0.207404781738107	0.323288557915218	0.329495440303879	0.158305616287031	0.267781048878711	-0.179834355905558	0.124749792727297	-0.0295466144197026	-0.367632169250959	0.954062910157329	0.0270771354484835
QSF_ACTB.16.31	QSF_ACTB.16.31	ACTB_SALSA	lightcyan1	-0.0164685857836764	-0.0897859312077509	-0.0318690730589025	-0.194868900681489	0.0729679307128504	-0.522571131948924	-0.171289910864584	0.36536068248361	-0.25489486581802	0.907749551087725	0.526735587706011	0.822538206887516	0.166244381141184	0.607199916780584	7.06802404540636e-05	0.224686420854711	0.00773610987773656	0.0682059610253229	-0.0505266944693354	-0.546050365383836	-0.553359745489248	-0.745652361086923	-0.263839975537991	-0.168377436063224	-0.318658813646639	0.155690543784012	0.129271172307564	0.126352846893606	0.507486190458843	0.095596524062496	0.155186311938975	-0.0380455527401305	0.257505110143929	0.00342960224908195	0.434814759854089	0.508274762548484	0.471964620971349	0.0757324507643919	-0.00261865500596206	0.288592365373039	-0.0334476863897053	0.319024584124754	0.0177576792238833	-0.737590091045668	0.722047675033466	2.82460466652216e-05
QSF_ACTB.19.31	QSF_ACTB.19.31	ACT8_XENLA	lightcyan1	0.23952266822974	-0.239371444332861	0.0492618214695967	-0.179508271941288	0.0257166472958294	-0.492871555202296	-0.244689174381529	0.509902930593603	-0.33486173045379	0.0872234949114699	0.0874292983213288	0.728736032924009	0.202890931430092	0.85639328829094	0.000205593940843817	0.080417241705332	0.000112805389601524	0.0152439351266004	-0.0131996369221232	-0.497365175283225	-0.491818063379288	-0.725569213684104	-0.0880994913405222	-0.0541449932487566	-0.423104098036775	0.0747134732151953	0.0718418075920547	0.0604179237752108	0.461786339137078	-0.0504000829182041	0.163469184893213	0.0744713141566017	0.457568421883452	0.164883072240798	0.506083940775449	0.322275289817908	0.241997045407349	0.0161315090399633	0.074702647523554	0.164090787853787	0.205647872426443	0.423485472950989	0.00221088101157341	-0.704533018839711	0.926003583422269	0.000176018075570966
QSF_ACTB.2.31	QSF_ACTB.2.31	ACTB_SALSA	grey60	0.108549258022069	-0.0715494148715805	-0.0350014666192536	-0.0581212829828882	-0.0321322119816367	-0.353575798065625	-0.186455877395561	0.147533424576229	-0.15479997255799	0.443676751059376	0.614222904224894	0.805419800961453	0.682336783874656	0.821096889412131	0.0101306333746378	0.185666353022032	0.296604881572562	0.273181991259408	-0.128220424487554	-0.365116025093112	-0.268576290067615	-0.453399719053902	-0.0586970359458845	-0.0890463746560594	-0.252456113419501	0.0192641785887499	-0.0231612154337291	-0.113081035994641	0.194535593054809	-0.136368284563485	0.24830315743154	0.135284937814698	0.0515589558197938	-0.113514132777106	0.303782882054528	0.395744792031554	0.34280913235239	0.542895356710673	0.00547204993291005	0.107035506819167	0.0217936566717098	0.278736933355586	0.0987641779816974	-0.429386159923233	0.364998714995826	0.00778031496353816
QSF_ACTB.20.31	QSF_ACTB.20.31	ACTB_SALSA	grey60	0.0929866388848827	-0.100080520433629	0.0104710438644647	-0.0762668826861578	0.108487073551069	-0.147511021049213	-0.103840760889804	0.0727702231933795	0.050691388839295	0.512043586123046	0.480236237386457	0.941269608214284	0.591003184611717	0.443939452937177	0.296679051907495	0.463810009562741	0.608176668005374	0.72117831058151	-0.0673957244705945	-0.122791793625276	-0.0236067600508377	-0.212365694036155	0.210142278767524	-0.00243247892934736	-0.257398815782388	-0.11090684525531	-0.239721577018317	-0.116513141859376	0.114707725694863	-0.138034380709188	0.267049294637795	0.0554977737813464	-0.0833186301283735	-0.0495433984428237	0.268335273802464	0.341481707693132	0.123193323764767	0.621702258097656	-0.0621462807680843	0.0693884125348193	-0.0978320721590589	0.228648315177453	-0.0545268694357174	-0.183871212796067	0.634983895167223	0.385817168396754
QSF_ACTB.22.31	QSF_ACTB.22.31	.	lightcyan1	0.19524948941241	-0.260986708422201	-0.0764026693197511	-0.187978270290842	0.065615181497235	-0.583466947062017	-0.324042828707821	0.424505258208951	-0.338671883779928	0.165402229220536	0.0616527926497698	0.590340666265415	0.182036451683158	0.643970606083557	5.63364676749736e-06	0.0191024476175242	0.00170959403007308	0.0140538133430879	-0.0426263056372001	-0.521089505345065	-0.499134306939529	-0.712073311652409	-0.148101617795889	-0.140345387201224	-0.365953880616505	0.0470334891499233	0.0100618817609699	0.283200560690813	0.487854707018737	0.00176014188090814	0.0499473691155717	-0.125367734202338	0.365727066417528	-0.00943544081613842	0.533235829078793	0.458365897619117	0.416308738403543	0.16516171860073	0.0072971694719204	0.31771679245202	0.14501625462488	0.372568831772452	-0.027207942622663	-0.70413485826076	0.764141389466727	7.47240753714962e-05
QSF_ACTB.23.31	QSF_ACTB.23.31	ACTB_SALSA	lightcyan1	0.20254252449846	-0.228284569927797	0.0698059692875385	-0.174514296293526	-0.0375068874607053	-0.503827910562441	-0.257562147963471	0.411809517519859	-0.338518141585227	0.149860658449125	0.103580016382967	0.622901768281445	0.215949610123123	0.791792163769078	0.000140246535933269	0.0652714643882808	0.00241935643399597	0.0141002485043872	-0.17697329094419	-0.500850062558232	-0.535988156342417	-0.743834464369804	-0.112237644773254	-0.173526667554718	-0.365780486626273	0.188957500385591	0.004392682618429	0.251745652043755	0.50801024124961	-0.0144286086486302	0.172169776764702	-0.0260967974898226	0.340789942959222	-0.022400106528262	0.53611076776508	0.515415260222926	0.34869579933147	0.211910883369482	0.00364279542822744	0.163057033423396	0.118212890570166	0.362255563412606	-0.0119824707660666	-0.719897277296164	0.209448134392426	0.000155811325754887
QSF_ACTB.26.31	QSF_ACTB.26.31	ACTG_XENTR	grey60	0.173521328985346	-0.0189626096779857	0.109399539568637	-0.0171890897349251	0.0454124583161901	-0.247370094455463	-0.157535159045676	0.460887498719168	-0.205759401881543	0.218614491623373	0.893853951038036	0.440093336332545	0.903732222781248	0.749212205770058	0.0770541849335774	0.264692345225717	0.000585058141220453	0.143359708762711	-0.234486645678894	-0.368641465805714	-0.501890106143341	-0.573531066086526	-0.292139920605719	-0.228935061067213	-0.147570414416016	0.294573318982727	0.338194446802908	0.216498933583012	0.332713368279298	0.0580400833876895	0.137395378249441	-0.06230542844844	0.442648918568106	0.307020381064916	0.3704100105127	0.363722349651201	0.252752292497964	-0.546878028670696	0.0986207640056171	0.160663821826434	0.319484480127808	0.187076525520381	0.0684403998584167	-0.57618694923533	0.0942837318992996	0.00716407602752107
QSF_ACTB.28.31	QSF_ACTB.28.31	ACT1_ABSGL	grey	0.130415697644114	0.0168960897217871	0.112418606915578	0.0690270783067595	-0.0011167098664294	-0.253060678905246	-0.129046230077126	0.301992163838294	-0.223400367608201	0.356777030525608	0.905365626288883	0.427500727186147	0.626795656198248	0.993731122887276	0.0702842342833672	0.361892560909179	0.0295672413241739	0.111385785058722	-0.364025146664716	-0.365242814927733	-0.534887146630211	-0.538551070532094	-0.0352095952926806	-0.161408248611403	-0.113096546300546	0.101864955821494	0.0682546451340467	0.369395852139035	0.432688501085299	0.158741493256987	0.159623082096325	-0.0850975866377545	0.12302672265943	-0.0246677080828198	0.286136530545117	0.414152035201837	0.325576417714686	0.127105143456742	0.00736928343171683	0.105785718545335	0.391553925293443	0.0849535877975583	-0.122845161739913	-0.539802698511402	0.00798009725272853	0.00775737906310824
QSF_ACTB.29.31	QSF_ACTB.29.31	ACT1_ABSGL	grey	0.254117987308805	-0.149577331313089	0.0380393942964756	-0.193683221894045	-0.0454262111864707	-0.293950926421264	-0.23929060914582	0.475257738652295	-0.269045670186632	0.0690801616944937	0.289888810775533	0.788903504391093	0.168888041557424	0.749138733584131	0.0344164232362416	0.0875394641200109	0.000370352404515369	0.0537704465045101	-0.138173615276797	-0.245473673340901	-0.42141114870079	-0.559992887802043	-0.160624197928041	-0.190461614770836	-0.24386980985796	0.299418221299454	0.146330046500431	0.118585537763465	0.353089149843254	-0.00971653874685544	0.274274470775113	-0.0545693362976457	0.503809519498319	0.0672038454880449	0.46978208636059	0.39639094149919	0.112573524665577	-0.214546070891102	-0.108263046589953	0.108966468742095	0.0809134025293589	0.302968994685611	0.0813272213805162	-0.544342913351856	0.328638963291299	0.0794213869780919
QSF_ACTB.3.31	QSF_ACTB.3.31	ACTB_SALSA	lightcyan1	0.0128283259449379	-0.12755895035563	-0.0140251195016709	-0.309825333921972	0.0581830599216902	-0.610986883736154	-0.170419343418242	0.465251130857335	-0.314817554158592	0.928079576814169	0.367498367609865	0.921390094085284	0.0254050953748345	0.682017061553367	1.50517182817161e-06	0.227086713596416	0.000510285942236599	0.0230180552779993	-0.0230370581593413	-0.556905522698137	-0.509191541306381	-0.798265286105975	-0.170918318334647	-0.085548946855169	-0.455496329625985	0.05790427781183	0.0286111179440366	0.116818057700449	0.498421016454724	-0.0342690227021956	0.12224166164599	-0.0795823265503517	0.294807541466797	-0.0202848706074117	0.497458112876953	0.497061003370305	0.488549515643112	0.144381630674638	-0.00334187669413062	0.353891406356004	0.0953666221133555	0.471934487945103	0.0672428292159375	-0.774880511159109	0.871222577134513	1.80507485142039e-05
QSF_ACTB.5.31	QSF_ACTB.5.31	ACTB_SALSA	grey60	0.178724894464676	-0.196817456835841	-0.0474710156035889	-0.0444172742240098	0.0429227471810947	-0.238283898915256	-0.20590512748412	0.20955019436117	-0.120351205678189	0.204901609852544	0.161965511423539	0.73823963838688	0.754534614418159	0.762548797232533	0.0889205688018697	0.143070261827238	0.135970948318976	0.395401189397358	-0.155407572664988	-0.299046945563676	-0.200787450561872	-0.404233112836844	0.0631906825085811	-0.176898145740282	-0.290480533626971	0.0343896326576519	-0.165585861269938	-0.0177040178351366	0.175497459807434	-0.166624835660498	0.267859014401208	0.169590895054933	0.0624569932530381	-0.0873224862206032	0.414845913501264	0.373763079917673	0.148064338250498	0.686258830904188	0.0594952414366266	0.163641993289591	0.110844611470909	0.281376755250578	0.00368240406383044	-0.3623423788445	0.271280665298133	0.0312726163983822
QSF_ACTB.7.31	QSF_ACTB.7.31	ACTC_TAKRU	orangered4	-0.013026961505993	0.013881584406789	0.138759087433986	-0.268808391532804	0.128462190684102	-0.146395674501286	0.0370214500314359	0.355519039995551	-0.157476719033004	0.926968948826865	0.92219210871694	0.326573684947937	0.0539902575698706	0.364087677662825	0.300386784899697	0.794427906896072	0.0096965161827043	0.264871870609423	-0.00276336806271246	-0.256743904239521	-0.16802685688115	-0.27233417707263	-0.0562182295919224	-0.0593502097288652	-0.142633847187318	0.0554380377410914	-0.16336129374212	-0.130122877465339	0.262897395569942	0.115705656992627	0.307254044900654	-0.0659569759771531	0.00209994995950562	-0.0975898121054949	0.181250901324216	0.600494680758463	0.321044608719442	-0.0412753334986503	-0.172435442175544	0.160453570290595	-0.40448783049347	0.141761041931745	-0.0241380248516159	-0.260199894147865	0.984488066308062	0.0661607431323205
QSF_ACTB.9.31	QSF_ACTB.9.31	BTBD2_HUMAN	grey	-0.134885875677407	-0.29677590741609	-0.210407475375231	-0.233607516913844	0.270250728738472	-0.522526731780388	-0.254416488000652	0.0807558862047893	-0.102660496745866	0.340388654421412	0.0326428112571808	0.134340249739708	0.0955605196862911	0.0526652549429675	7.07984469843803e-05	0.0687432170947259	0.569278970019073	0.468932942608805	0.581745253903485	-0.130547338248199	0.0528607128133899	-0.19026520966133	0.15947602158456	0.17386238269875	-0.34445315586715	-0.450718563003749	-0.281722645484162	-0.129733780681197	0.128833913297932	-0.128318749263861	-0.344066211528344	0.0561973562051765	0.0316790573135589	-0.0291862666546721	0.173682970416903	-0.0584149512885046	0.258183913650666	0.391945605675687	0.0200836153959007	0.261802521694677	-0.186379218405592	0.314772247909873	-0.0602736294538198	-0.185965179662275	6.09427664252744e-06	0.356287636776216
QSF_ACTN1.12.28	QSF_ACTN1.12.28	.	grey	0.155639519929002	-0.0327959889977299	-0.0652688254842413	0.0956870968141032	0.0272025535072579	0.232914959001941	0.0792387815600996	-0.185987631121045	0.113723651598531	0.270557170752377	0.817463727668595	0.645724656667139	0.499811158118634	0.848190841484689	0.096575764031183	0.576579431616719	0.186793174826242	0.422121008618727	0.00446932874495793	0.0941290459452243	0.357654484634913	0.155791557026434	0.0582821367922351	-0.101619598281328	-0.181231731392172	-0.221966575415326	-0.182127530067084	-0.286806457175756	-0.321494116191604	-0.314115084019439	0.134801430273882	0.106204978060207	-0.0777555598586286	0.376933661613172	0.0694305275482922	-0.121940944455672	-0.271537573428826	-0.0883617508760945	0.0885020518225978	0.166923088061464	0.0377978896424647	0.271765797949634	0.269752897849897	0.175518433120277	0.974914275941038	0.506850345290627
QSF_ACTN1.13.28	QSF_ACTN1.13.28	ACTN2_CHICK	grey	0.121702874821292	-0.0498953677866471	0.115998763470518	-0.143512537896542	-0.242665301039009	-0.242408255872234	0.00212051214303848	0.10447524716801	0.148281012598309	0.390076158855698	0.725383446585543	0.412835043866877	0.310109307792077	0.0830318150679119	0.0833686076884194	0.988096384856514	0.461068566556181	0.294136773121841	-0.199655797517002	-0.153948943399516	-0.265318542396125	-0.382886306398638	-0.164105870478147	-0.0633109751618714	-0.209003802319924	0.113666086358855	0.144864671704085	0.214038350414213	0.307487662657609	0.0193001753254985	0.246819242994033	-0.194776697700099	0.125523626700405	0.181060730764791	0.24390962096756	0.34811404474104	0.136947215309491	0.2420710924527	0.180354377354968	0.322449970413971	-0.0302141675451052	0.175020459029759	0.0390086133657789	-0.433003569188114	0.155877773399794	0.275859885886603
QSF_ACTN1.14.28	QSF_ACTN1.14.28	ACTN1_CHICK	grey	0.309959378908843	-0.223927960673112	0.0685288529127107	-0.11848725414795	0.216283791230585	-0.0876109152175355	-0.187986072660473	0.233469394503976	-0.107058352162808	0.0253383896552966	0.110521537452798	0.629291727986313	0.402813854428486	0.12355475400358	0.536837107856605	0.18201798061709	0.0957623337492849	0.449998835938012	-0.202743513925894	-0.316910216682777	-0.272201717934899	-0.40015941903767	-0.105157017302951	-0.286266230090087	-0.155946403999305	0.343287589822387	0.165528073628609	-0.044066517967229	0.146829486779853	-0.138850466491459	0.145462017020009	-0.110601602246908	0.0822953912333212	-0.0481564196104266	0.339133664720063	0.420755016007499	0.114818433311601	-0.034370355943302	-0.0381145667871712	-0.0322017342796189	-0.0869140417171636	0.189731188657233	0.13376175433391	-0.374323597861992	0.149448204147651	0.0220751808108428
QSF_ACTN1.18.28	QSF_ACTN1.18.28	.	grey	-0.264379508068674	0.0299717481929037	0.168912965198511	-0.19035353551786	-0.00714264520396608	-0.215221685249929	0.135055098239925	0.191636864372425	-0.118684441689549	0.0582282456864847	0.832947529647264	0.231281795444743	0.176475408402179	0.959919273251149	0.125454000301177	0.339777594437958	0.173522435745253	0.40202587051672	0.0122099487549223	-0.157377275424665	-0.384166588150565	-0.405570772020021	-0.00331601441198483	-0.0655535579135353	-0.176475844675365	0.104309865551009	0.124509845451773	0.307943504494464	0.440076307285586	0.1663275427168	-0.133374054165176	-0.151051143708943	-0.00637842513920712	0.12110613338288	0.0262517321383434	0.145840922670638	0.246598129291916	-0.165430473287692	-0.064462845296713	-0.0225919547844849	-0.00742085783453029	0.0266505191538126	-0.23792338935585	-0.413462677996028	0.931537960267888	0.265177544368718
QSF_ACTN1.19.28	QSF_ACTN1.19.28	.	grey	-0.176080039242492	0.438200488736717	-0.117015418983119	0.221005157941992	-0.18733099946276	0.18871212087053	0.065604333883166	-0.254155302605675	-0.0948648889637976	0.211793764345639	0.0011576766770934	0.408723769005635	0.115374530566719	0.183573477007174	0.180305052554689	0.64402551255787	0.0690379687614593	0.503519565254878	-0.220582321343263	-0.133881678707013	0.114991149727188	0.213345754089444	-0.106020086704164	-0.0511178310526633	0.245686343008265	0.166636994346239	0.156517742796711	-0.102397457484625	-0.45250143477921	-0.194505124105008	-0.0246148999237966	-0.0965118742712408	-0.140437390154692	-0.135908504761864	-0.329756872004479	0.0132471991321499	0.0875342763956446	-0.0220664183844508	0.185308703412177	0.090516611810026	0.322366778751954	-0.0459347517194042	0.433685797922654	0.229420253665465	0.116089849907291	0.344028826924463
QSF_ACTN1.20.28	QSF_ACTN1.20.28	.	grey	0.0895865040311623	-0.097396781111823	0.0332925010707862	-0.215169162051883	0.123121176132451	-0.385651759905891	-0.0421485778539857	0.0532934977266277	-0.158577835484719	0.527657861525592	0.4921452068067	0.8147485644038	0.125548490889434	0.384534330151208	0.00475034963253186	0.76670995194358	0.707489676794335	0.261502950984609	0.0116759792826096	-0.134731831527288	0.109881777072773	-0.189130467995611	-0.0226858570672311	0.0343902071112458	-0.326421649638239	-0.109448037473351	-0.367763667487068	-0.0188584335441843	-0.0886093291370527	-0.360745838859503	0.212298188344812	0.229084378226885	-0.0530780521334038	0.0357608019144136	0.243081628937591	0.142131610428168	0.199247587717795	0.182507265040902	0.0209186150834354	0.258632175874754	0.261094923400409	0.472395427979093	0.345664851906184	-0.160881385440995	0.934525289747099	0.340945498636477
QSF_ACTN1.26.28	QSF_ACTN1.26.28	.	grey	0.143628416106674	-0.0487600658058669	0.135411543949142	-0.00670281145027156	0.248796848104973	-0.0692030680174556	0.0142151067044961	0.0315709495777912	-0.13445517127639	0.309714700533353	0.731394790503173	0.338492707365496	0.962385554462369	0.0753102717973571	0.625914948465215	0.920328643648152	0.824171850436123	0.341946999077044	0.083157492429117	0.0869974543620653	0.428229893963577	0.234092819268454	-0.0637643424955124	-0.0158283345928963	-0.129315157863035	-0.141844508055664	-0.351398223897211	-0.199282441433718	-0.321646090510258	-0.312495317167709	0.140275104619773	0.187621971140607	-0.19264524538224	-0.00596142760865842	0.125177284954139	-0.0808570668323713	-0.269173329057469	0.0197780609989036	0.0336735138437106	0.104416176225467	-0.137227036794294	0.243858593957528	0.277963353773146	0.275200155879548	0.557810507890454	0.539703207135616
QSF_ACTN1.3.28	QSF_ACTN1.3.28	.	grey	-0.0135994353246299	0.0771771794344593	0.171310027931288	0.0776489352785268	-0.0528590031943924	0.101252673410683	-0.0799688899821644	0.0718533786763219	0.19404504582622	0.923768863770025	0.586568099810443	0.224631163501875	0.584275544601205	0.709769146210401	0.475083077035481	0.573060733404168	0.612715077641135	0.168078075720669	0.142559098574852	-0.164765528270714	-0.407166907416504	-0.128111395220026	-0.227635184386346	-0.0087377961359075	0.315423390926429	0.11336402806911	0.203634358776221	0.0541262826541664	0.329041232744042	0.569253617462562	0.0642673789630897	0.0429304565150163	0.282842460766468	0.189050752501752	0.0368098174851316	-0.214072078585063	-0.328903792731285	-0.425409505150405	0.0116510377468437	0.0345377043452041	-0.0497709732798185	-0.355966843188301	-0.338377900407966	-0.191929932795813	0.313368327612949	0.243106610886183
QSF_ACTN1.4.28	QSF_ACTN1.4.28	.	grey	0.152942457196293	0.0888724269319923	-0.0826037153429196	0.176196475730633	-0.0179567057929421	-0.014089090249804	-0.312340255699291	0.0888544688368205	0.0173952849867953	0.279049286284291	0.530966726393367	0.560445282162307	0.211486969574878	0.899454840441477	0.921032676976315	0.0241778435291424	0.531050071352084	0.902582970985944	-0.330063990294605	-0.278810674800078	-0.430170402256025	-0.279608917894899	-0.395018183342151	-0.409410972789149	0.234733333532479	0.329313111947039	0.247835243405558	0.312421601908967	0.157904564674802	0.165246717831187	0.016957025617414	-0.114563485734296	0.104344540304459	-0.14992824967607	0.198522985676434	0.119511720699182	0.0391227395611615	-0.0207699418253199	0.148136202116945	0.030474645142984	0.152352972796949	-0.212193761346269	-0.0523813684803975	-0.304720128335895	0.0168639894181149	0.0453340037706954
QSF_ACTN1.5.28	QSF_ACTN1.5.28	.	grey	-0.120620139483603	0.249529996604902	-0.0529364041012845	0.29851436470314	0.0940875974057714	0.320923217355824	0.118178904042033	-0.423597608688046	0.0985788686215048	0.394338318434599	0.0744263801447295	0.709362896171857	0.0315895680656183	0.50703829478459	0.0203580208998808	0.404047854086626	0.00175334673357933	0.486880904007886	-0.000856269357166743	0.348687751616678	0.518842085991138	0.67331377552285	-0.0606904521914988	0.109153881042939	0.379195027031129	0.00703523474360275	-0.208460242975777	-0.241503179522669	-0.60294814673933	-0.150303035402529	-0.223676860597361	0.15265185942143	-0.226868533408035	-0.22804637434983	-0.635278884245728	-0.348565834489104	-0.0633902331236461	-0.0842045195027093	0.208391660370371	-0.0210229334501627	-0.145574697751087	-0.201495350292708	0.361666481688309	0.670637162364864	0.995193138699107	0.01129749582192
QSF_ACTN2.1.3	QSF_ACTN2.1.3	ACTN2_CHICK	grey	0.0393817437493724	0.252151497238397	0.344957619280872	0.309390289378177	-0.138242796394378	0.148130568493111	0.0211027649732718	-0.181362464116509	0.0891103185784241	0.781634296309581	0.0713329163008527	0.0122640963280106	0.0256226053525883	0.328394497040528	0.294632377231812	0.881954925085704	0.198187440728892	0.529863259796054	-0.203319234056609	0.0225117902977947	-0.149543353441949	0.0225994925901892	-0.268655391664779	-0.22233838417703	0.310465487807987	0.376113916147898	0.277549859867943	0.194091961711897	-0.0671144246936335	0.085860475878845	0.0159624576860347	-0.0512029967170655	0.407215950368875	0.277522420046917	-0.0186409331441522	0.0200918053942028	-0.0563686357507195	-0.325766656705342	0.188226464160835	0.0273378495639129	-0.0444766785657912	-0.173147382476513	0.187144076391843	-0.0325782592835673	0.148271406669177	0.874134814370213
QSF_ACTN4.1.9	QSF_ACTN4.1.9	ACTN4_HUMAN	grey	0.128937575992964	-0.0601209219047609	0.176770786901316	0.222391998066483	0.181364269155555	-0.0220873082596903	-0.273410754920908	0.242396984443076	-0.0490596651751523	0.362300328079317	0.672016140344791	0.209978293021222	0.113051965068555	0.198182899927287	0.876489476146846	0.049854330184181	0.0833834005592351	0.729806862200628	-0.217560582007411	-0.246019971781562	-0.572115582836262	-0.444239768152315	-0.0384719129513001	-0.237836282904395	0.0794919898246454	0.269917381396939	0.390555223972215	0.185684967998152	0.321362585404576	0.231363589057405	0.0111459038375128	-0.0979846537036307	0.323083479627358	-0.0106100334580384	0.286952264910516	0.0571264434717808	-0.0802165203443289	-0.110436233675404	0.0808437721063783	-0.195147017678285	0.234698369040691	-0.154160276127426	-0.254794747875356	-0.423200955054979	0.121300510390655	0.078733668468818
QSF_ACTN4.3.9	QSF_ACTN4.3.9	ACTN4_CHICK	grey	0.208975062662385	-0.0819371934720221	0.0507669516624526	0.128695447230188	0.0422952219841455	-0.0237996119254348	-0.254684839557759	-0.0521056365321307	-0.0177317330499789	0.137073225665591	0.563624207028104	0.720779557452626	0.363210014774415	0.765921235791939	0.86699777918755	0.0684414234514304	0.713727465818722	0.900708166860573	-0.350447482179634	-0.335833115352615	-0.0766914199615712	-0.3217767250045	-0.175426469956376	-0.345677661572933	-0.171537234087044	0.245223840984738	-0.0245893098899911	-0.0125010887728297	-0.110409942837888	-0.324045549167622	0.110042853606512	0.0838086557936124	-0.0071583659014606	0.0406772906900662	0.407482300123699	0.354869448653304	0.042754252294416	0.425294235590227	0.375509250831224	0.185602514901219	0.307157935120317	0.289596258002112	0.286455772010518	-0.269884207252215	0.0108647431397467	0.0149326311150794
QSF_ACTN4.4.9	QSF_ACTN4.4.9	ACTN4_RAT	grey	-0.268375300234069	0.122871677246428	-0.0830661684763875	0.11286598424715	0.000778064997305088	-0.180956452278703	-0.325109525606231	0.125137726151793	-0.0361730848239372	0.0543933408338348	0.385505814984047	0.558244608583339	0.425652179813218	0.99563215205823	0.199210689823823	0.0186884677761574	0.376735818629127	0.799039663740511	0.178773616221937	-0.375319495693059	-0.469134858439505	-0.38487266526664	-0.167019047046537	-0.302555037267163	0.0722911314160543	0.134394944202663	0.197102967842437	0.0926588676123604	0.272632197598028	0.254055327720971	-0.0307360787051232	0.0100573803809987	0.282669623449812	-0.0935309431653817	0.114403651105771	-0.0641433053585179	-0.0853912948663817	-0.0129797044071968	0.0962469414125048	0.27373310009417	0.0114089835501315	-0.0486388621352871	-0.0265365924726305	-0.401935201765246	0.20477614858624	0.0061123685843394
QSF_ACTN4.7.9	QSF_ACTN4.7.9	ACTN4_MOUSE	grey	0.0638741958091399	-0.147806513405556	-0.192715592157218	-0.0395181940923553	0.153136612428538	-0.127558992511403	-0.170392233725624	0.12931689213477	0.0270348327373264	0.652806749963434	0.295701745742937	0.171068085796314	0.780896401770651	0.278432153062021	0.367498207978178	0.227161742829653	0.360878008332234	0.849115906742454	-0.209460211286677	-0.288923270649756	-0.174219643057277	-0.344020450840726	-0.367425213199173	-0.289782358828322	-0.128981189942501	0.235606024907145	0.192975331985349	-0.0428368825321516	0.0709010414076631	-0.000372190273395776	0.0886849223478745	0.0800860775077742	0.118047657397514	0.0176942463204311	0.324300407686061	0.419441784069048	0.228856761663549	0.0589380075872963	0.2883038289725	0.264679970557883	0.188224837395112	0.149874112680949	0.112777891773495	-0.317408054361144	0.136142967443739	0.0377702277665971
QSF_ACTN4.8.9	QSF_ACTN4.8.9	ACTN4_BOVIN	green	0.226363584338609	-0.00110159494338187	0.181111543535052	-0.115418818720334	0.0138284075003304	-0.203344147952009	0.0672641360725039	0.0794432473710044	-0.0103030995694971	0.106598175572493	0.993815971911754	0.198819381028375	0.415190896653479	0.922489258753979	0.148220636936492	0.635646283694113	0.575593029838498	0.942209968650022	-0.240748935164553	-0.0659704096588658	-0.0189033831268798	-0.309526569333078	-0.058266820020083	-0.0641558407453757	-0.36965480152575	0.142188509938488	-0.159554832824374	0.0609953983613439	0.112249847608036	-0.29827908449973	0.553998008309832	0.259867469538866	0.0342770530996616	0.167118372326017	0.181771550534146	0.252927796758803	0.0324820815946953	-0.0486885643018625	-0.0414536969975114	0.00540881465403288	0.0349604154097011	0.418066196474291	0.257124219137539	-0.298791297217354	0.0855686139994905	0.642173619422909
QSF_ACTRIIB.1.1	QSF_ACTRIIB.1.1	AVR2B_CHICK	grey	0.285318927107138	-0.0261622057873751	-0.0361516467380121	0.038315982966538	-0.031348090221688	0.170710982144478	0.00282973728268945	-0.0167005656953039	-0.310902622730716	0.0403368534505286	0.85393211194737	0.799156291089292	0.787404216676018	0.825393548072161	0.226280652853854	0.984115555455726	0.906455841405012	0.0248731396971703	-0.264182892691162	0.354115506395713	0.323835269917592	0.248683671225969	0.419067806037673	1.01283490013346e-05	-0.0286472306300065	0.0295502084532596	-0.201669087530178	0.138529656683674	-0.318599780130511	-0.422120610268316	-0.0172678756112268	-0.0704351218491987	-0.0750812896353305	0.000586957222764813	0.0622565104761304	0.00845874242697117	-0.0279588348110978	0.0633507722325352	-0.261356503715552	-0.185004548986916	-0.0525092579723722	0.130394426887496	0.237062582791755	0.270698501998637	0.0584224255157357	0.0100084126979095
QSF_ACTS.2.19	QSF_ACTS.2.19	ACT_PHARH	grey	0.129074728593873	0.0033285606419479	-0.0524219563366262	0.0941269371930048	-0.156066490554141	-0.0335410032424161	-0.10183556434309	-0.00348921404030424	-0.119822589900361	0.361785655202483	0.981315920035713	0.712064549353715	0.506859906625861	0.269228711611435	0.813390444400627	0.472531500924826	0.980414302171122	0.397495252750478	-0.232953491838215	-0.0426379536993289	0.158820696646603	0.0232700262003856	-0.105352768288447	-0.0963140505610794	-0.0967513563413358	0.158570724038461	-0.0373633717947564	0.0584172747437518	-0.285597767578621	-0.405782519023123	-0.0109230328965321	0.27001528532281	-0.0836760235275598	0.269059465592021	0.0389987107204962	0.182649433490119	0.204352339116257	0.252663793984575	0.431635009119544	0.147734638086962	0.218254434309091	0.200715167611893	0.363970046729288	0.0554207454522434	0.096519058548447	0.764078793511873
QSF_ACTY.1.2	QSF_ACTY.1.2	ACTY_MOUSE	grey	-0.0165392186052625	0.41776822132317	0.220747911117679	0.328660340004915	-0.215877962959618	0.170840812164874	0.24444446114798	0.0223168777782428	-0.253110035489683	0.907355619435202	0.00205892277256574	0.115809317603713	0.0173648008638015	0.124277865811406	0.225922452978606	0.0807298884404358	0.875215888685855	0.0702276575422602	-0.327436826147335	0.0764657903784328	-0.128599275733524	0.187220404081712	0.170880307553571	-0.0628024371694537	0.367834567613116	0.055695533247894	0.231235740189137	0.159941378743634	-0.0773606912055585	0.203033755335528	-0.0342492705955412	-0.141065026425389	-0.127298730679702	-0.202293735805864	-0.313599718351925	-0.0337015754095197	0.00728238766551795	0.0988932727479663	-0.0533593214676194	-0.0442320498310539	0.178940792481895	-0.318172100742634	0.0654576543138914	0.147353692930935	0.017811601043551	0.590032804412196
QSF_ACTY.2.2	QSF_ACTY.2.2	.	grey	-0.0560041720806353	-0.190514429243091	0.0672745454533261	-0.0958223341375746	-0.0261575596574694	-0.487177854660066	-0.34119246113473	0.17024377350637	-0.213031583696455	0.6933268303149	0.176103209645309	0.635593874739061	0.499202545830958	0.853957769174936	0.000249545302387492	0.0133109684407869	0.22757292767186	0.129439847361755	0.200824169793958	-0.314663170947188	-0.324932548557821	-0.427533478523307	-0.17061517062874	0.0804897316164957	-0.256200805022004	-0.0998764385301338	-0.175092919214293	0.307349671613083	0.469711931777814	0.147099381616854	0.0510903249823407	0.228947922035988	0.241498402545831	0.258106834634409	0.381042118514012	0.0642472685152963	0.117284549769161	0.253433446572661	0.141852612395811	0.151309388236549	-0.0641977814648155	0.182797422120845	-0.259285413962645	-0.48445894561234	0.153421352423237	0.0230889375214978
QSF_ACV1B.6.6	QSF_ACV1B.6.6	.	grey	-0.0584459931626135	-0.226473548170017	-0.164305753046466	-0.56437558321453	0.0411977705224464	-0.342292255394743	0.0916525288182847	0.143430769433204	-0.0605440951951996	0.680656888208261	0.106423602312134	0.244442395546535	1.31422931401372e-05	0.771829463667582	0.0129975444822503	0.518142168629501	0.310387952636205	0.669839620914632	0.244200901511785	0.0223754446093699	0.0573071161881672	-0.283223314917509	0.0923467244824447	0.168180557665019	-0.523728348454095	-0.187711253541999	0.0581751343025567	0.0144691288845845	0.205847472841758	-0.262974283497958	0.012804076392578	-0.208331917956353	-0.0790120617676434	0.0075621437845753	0.16299396332456	0.0536039718156266	0.0853711034291602	-0.0814874579461537	-0.255403552368873	0.0649071939715753	-0.0666738162688497	0.397872688307017	0.0198565412903282	-0.258756017692961	0.0810420107923128	0.874891026328805
QSF_ACVR1.1.3	QSF_ACVR1.1.3	ACVR1_CHICK	grey	-0.123408860513624	-0.126001433370719	0.0377725594949675	-0.134349072501652	0.173535369733685	0.00969571662317386	0.158892097722646	0.0904108463368883	-0.0871432090217836	0.383415964916043	0.373424792346804	0.790350638761012	0.34233155652149	0.218576650753615	0.945611494497357	0.260546742108585	0.523850774317815	0.539021566754565	0.381639383217844	0.146101485913757	-0.019594258269812	0.240347823038541	0.240598814539546	0.373649591681675	0.178969513546922	-0.330920690458242	-0.199856982055257	-0.167588076463672	0.222782501634692	0.464114200799665	-0.186117246946001	-0.0349589880412376	0.0996473245553241	-0.098034749346381	-0.21426491270668	-0.0853060265779271	0.0711563430158827	-0.198349093137646	-0.347078784820775	-0.0790746765530825	-0.316120214318285	-0.279047944481383	-0.436308178969931	0.188361743462829	0.00524386226541895	0.301369721596979
QSF_ACVR2A.1.1	QSF_ACVR2A.1.1	.	darkgreen	-0.0966480191580455	-0.192955022613477	-0.0654518523186907	0.0201384380919503	0.289130922699932	0.00392883193923029	-0.125536174940575	0.0714117796243827	0.00831434779747985	0.49549498897999	0.170526762672683	0.644797515153841	0.88731343810294	0.037626562298529	0.977947209035649	0.375206187091606	0.61490617124354	0.953351058360767	0.367582506935574	0.190549772551635	0.0298826725404304	0.408861750220605	0.26682425164475	0.374178032262223	0.360606853810126	-0.243553418838063	-0.134379841451043	0.0255143839189522	0.00809576966171398	0.373109221987523	-0.22644017947817	0.0829432978530179	-0.14785880747912	-0.0732129045830335	-0.316631472598606	-0.237692976399745	0.0398223661918651	-0.190640036540349	-0.150168431103405	-0.365028212524628	-0.265717059581117	-0.508296222625641	-0.566620007299091	0.384880183530285	0.00734455316273305	0.176021525321996
QSF_ACY1.1.1	QSF_ACY1.1.1	ACY1_HUMAN	grey	0.247763635360992	-0.128005097232898	-0.0506653882657653	-0.0340094496766595	0.0341880228324545	-0.168295759724063	0.0538152070066371	0.133948319763991	-0.00491969323245482	0.0765700061471687	0.365811284891298	0.721315535402696	0.810831761745201	0.809856898529847	0.233015956757366	0.704756013210335	0.343786512073837	0.972387376338019	0.160537317671299	0.082629227107105	0.0584731800213399	-0.0841416852273136	0.174759076035323	-0.000858665370003383	-0.284207409678265	-0.25248238013617	-0.182647152113152	-0.0518608210327094	0.114603342270866	-0.118436116971574	0.167853556468916	0.160681186544713	0.387779047085625	0.142723882459757	0.0957689712454881	-0.114088720762616	-0.133788709441163	-0.0595409597753167	-0.292589148309463	0.235542106444749	0.0207728421490811	0.332914787917847	0.137222779614134	-0.127718228844203	0.255579121222243	0.560323773322733
QSF_ACY2.1.1	QSF_ACY2.1.1	ACY2_DANRE	grey	0.290371602454198	-0.408170606748413	-0.228520397520022	-0.333626582437826	0.201427157827287	-0.168602541651593	-0.0635959875730282	0.241988406285209	-0.0296257779252571	0.0367775529067238	0.00266604492590297	0.103214080838288	0.0156477543556387	0.1521648343933	0.23215287760685	0.654223186907999	0.0839210204991922	0.834848752253185	0.0843822834958573	0.0472714523982595	0.170226626459345	-0.245329556481419	0.190581561640335	-0.174309068424225	-0.474163264376507	-0.0362230305987586	-0.268720654539083	0.0815812044088189	-0.0194090172182787	-0.505598545766466	0.09202047279124	0.0656443130731254	-0.0065136286125	0.143408133164833	0.429187236813705	0.135359850653835	-0.0532416163356824	0.0613621831610331	-0.193034374104933	0.130520335272829	0.132448386436726	0.534548508334718	0.306248505819812	-0.201843029322209	0.552004010376076	0.739301133934013
QSF_ACY3.1.2	QSF_ACY3.1.2	ACY3B_DANRE	grey	-0.349937927312307	0.455375119527523	-0.0116386590204684	0.160998086680114	-0.00448997816275904	0.282358783729256	0.0797002846947199	-0.163538296272325	0.235194973653903	0.0109885584195044	0.000693586721813127	0.934734114463965	0.254199381538924	0.974798410910036	0.0425504682616733	0.574354105777789	0.246683199524092	0.0932646819916022	-0.104157157917903	0.0872602377997245	-0.0697477139925875	0.0207474877296971	-0.185931373693063	-0.157152690583628	0.19276145162601	0.0925448162227653	0.417236927095086	-0.0433824363600133	0.0131443177632856	0.191269007113065	-0.126321310027116	-0.243833454685212	-0.0078354633252833	0.0340338023596072	-0.327498063036073	0.00384664434184105	0.0117395631685603	-0.247595138605395	0.0419379812459985	0.102612479939876	0.00746259856612564	-0.169524459565063	0.204806259101969	-0.0404027443479659	0.462441844923309	0.538474569628469
QSF_ACY3.2.2	QSF_ACY3.2.2	ACY3B_DANRE	mediumpurple3	0.300509401294663	-0.0655041973032842	-0.14741909934328	-0.0124105664975307	-0.164206947661407	0.000136301356371647	-0.165227588078267	-0.100559931337247	-0.145938882967138	0.030415852998658	0.644532454555321	0.296983498828016	0.930415829724242	0.244730105688575	0.999234837197706	0.241769209485709	0.478125030398887	0.301913897231714	-0.241160777662383	0.15087810795002	0.290557083407938	0.0318991238117651	-0.0668299761128035	0.0202297947104947	-0.271867337261038	0.139112060136684	0.15510748642456	-0.0399364724878742	-0.376196305009872	-0.589871670312983	0.236622178138263	0.0928578787961123	0.0341148597619126	0.367846593845284	0.17269735011375	0.0962540318077082	0.0732973006003695	0.109295073839829	0.104303712570261	-0.120033234480459	0.45354212174977	0.412297984695524	0.471142130638148	0.0457231148202637	0.0850183750656765	0.285666697185066
QSF_ADA10.2.2	QSF_ADA10.2.2	ADA10_HUMAN	grey	-0.133250195279297	0.0343457029562677	-0.158710088221596	-0.018314874533488	0.341796886109756	0.16647036042272	0.110446439131269	-0.0545665197332299	-0.0214443510992243	0.346330220807432	0.808996331855102	0.261100258010261	0.897459979976608	0.0131379247241261	0.23819702955363	0.435703496517021	0.700825763662957	0.880058063315309	0.0839603052581028	0.167526927131027	0.241518876960457	0.33092910957532	0.481491134993756	0.132892206589322	0.164872959981388	-0.224062755783431	-0.193255628856816	-0.102355890645512	-0.32670800499148	-0.0802587461422744	-0.202299492065447	-0.115528648175986	-0.289267350373709	-0.144612390563489	-0.183023645656715	-0.0554674214243874	0.0860349450787862	0.0072074037683675	-0.0666124750743971	-0.150671292098936	-0.0767739231131768	-0.136496112626635	-0.01180731216287	0.403544835783448	0.554001274187528	0.235188623785092
QSF_ADA17.3.3	QSF_ADA17.3.3	ADA17_HUMAN	lightcyan	-0.180942005103376	0.251605388650901	0.351681550254695	0.418257437083678	-0.146448906774254	0.427280039543026	0.159816809072192	-0.302542226091231	0.0685370840590179	0.199247169072997	0.0719687700700993	0.010569850630299	0.00203156995374059	0.30020914797984	0.00158181014135444	0.257746731323601	0.0292574933601624	0.629250457080239	-0.0417164409897888	0.187870765120868	0.0187126077541387	0.528297335603778	-0.0395309976489672	0.088519127342398	0.639925936947544	0.190092514843637	0.181481688930683	-0.164007370684235	-0.17386321439825	0.463527295796607	-0.0780472349063594	0.150860615553683	-0.0631262184885434	-0.0618308006750572	-0.503918619461117	-0.338601236957104	-0.269686977764842	-0.145980853892162	0.0287127743945179	-0.29739351234965	-0.251944060877236	-0.635525104508064	-0.187819711918177	0.473970421928904	0.769035533224274	0.182291093054025
QSF_ADAL.1.1	QSF_ADAL.1.1	ADAL_DANRE	darkgreen	-0.213631384602317	0.522272375084678	0.035908684897807	0.442462752201029	-0.259143354648636	-0.0124801333227803	-0.139889966014008	-0.0601558307083132	-0.0190099508858685	0.128338888955135	7.14791208834021e-05	0.80047835369749	0.00102199244534448	0.0635800783655448	0.930026747494382	0.322607667844594	0.67183649165742	0.893590478657233	-0.254289836970277	-0.116300598733543	-0.345099074782341	0.0497527620618414	-0.370156291896856	-0.187830321628025	0.557070736107254	0.433734122569211	0.426163191309697	0.368437930707218	-0.0297466187024833	0.318444936525384	-0.0497518230551261	-0.300050343037413	0.134401549342188	-0.216935183934924	-0.189845255313101	0.0350869450304388	0.140979775494443	0.0124025322997585	0.171431983794326	0.0698477553999948	-0.10857524230433	-0.446022177314119	0.0503498020850433	-0.0165549372668369	0.0688860192361135	0.411611973112031
QSF_ADAM8.1.2	QSF_ADAM8.1.2	ADAM8_MOUSE	grey	0.192223658181907	-0.16017225241889	-0.066485902449316	-0.0956923638585058	0.186401641613366	-0.105804280294397	-0.172674890406439	0.0210488209443834	0.0602956777443657	0.172184201815896	0.256675859537015	0.639569515819685	0.49978744754772	0.185796619818358	0.455354743772949	0.220904141770796	0.882254541961848	0.671116989140673	-0.134249196412287	-0.486153103524597	-0.168488074498363	-0.289047396728468	-0.382707370001791	-0.080706667597276	-0.0747687009932075	0.192244987682912	0.253703454983285	-0.0985107124852295	-0.0185587125114618	-0.0563850436528464	0.0122854881313647	0.0116014967465606	-0.00999031100717406	0.0838710363359238	0.235665189035719	0.192298623134597	0.16805496945182	0.0214919211755302	0.472179806481251	0.0934323945018535	0.239508262272552	0.10386135443677	0.115708509843211	-0.248785063438362	0.342693804626219	0.000258307589530303
QSF_ADAM8.2.2	QSF_ADAM8.2.2	ADAM8_HUMAN	grey	0.133010745816849	-0.0668325156311847	0.0691678312686261	0.159921122345084	0.00159222796358474	-0.160995994731998	-0.245065828397832	0.10768841223048	-0.00862708149692383	0.347205356374126	0.637820953389014	0.626091242836768	0.25743214759528	0.991061797804609	0.254205634348096	0.0799378911138432	0.447321089490527	0.951598467993714	-0.394976448441894	-0.664966206903309	-0.557088812606126	-0.493965096553506	-0.468821548579036	-0.417432314401783	0.119308968100299	0.509521090121799	0.333906807640305	0.242425541692021	0.148808717846268	0.0835126469653603	-0.116608298941085	-0.120146683900188	0.201981474858645	0.141283315392241	0.408864845033594	0.368112107136578	0.303494000295877	0.072412344305871	0.580935867977561	0.243559642259589	0.199041501707346	-0.0471947311339744	0.028628500826304	-0.473835174453974	0.00375770678922037	7.58317609210104e-08
QSF_ADAM9.1.1	QSF_ADAM9.1.1	ADAM9_HUMAN	lightcyan1	0.14585836028384	-0.253451310258326	0.0968142240922362	-0.247353765624111	-0.0486249459165375	-0.476528667453362	-0.129415644582041	0.253976680170924	-0.173947576101257	0.302183613317897	0.0698374498925765	0.494750409975974	0.0770743266673314	0.732111314900078	0.00035532821814433	0.360508274801304	0.0692401258472439	0.217467756302781	-0.0491373138645595	-0.439253571458335	-0.4301979054983	-0.786011927161228	-0.264253538356192	-0.208128814494875	-0.597065338656957	-0.00612700070169326	0.0852189075398375	0.046251239611192	0.526705677805289	-0.0974935734997294	0.17282917137002	0.135003305507865	0.201364781218998	0.309817744723873	0.649943296117155	0.175144446037144	0.00794631991310723	0.121390990065885	0.0873954505649172	0.18497733632185	0.141179100996562	0.516146185844492	0.015624490566175	-0.765695854626888	0.729395493696775	0.00112273137118545
QSF_ADAMTS12.1.2	QSF_ADAMTS12.1.2	ATS12_HUMAN	grey	-0.013121004401978	0.0224869610780666	-0.108939545726582	0.108279909686163	0.0260372477886506	0.257715337352514	0.11276704595217	-0.00977053532925413	-0.0606251708300237	0.926443176207465	0.874272516001809	0.442029925477326	0.444815249657625	0.854622217012996	0.0651060430908362	0.426060599266356	0.945192434253529	0.669422928247411	-0.124989899131688	0.0967707633501114	-0.0292422861894924	0.274937497563976	-0.157555558811149	-0.018369793130294	0.396722453935145	0.37854558383138	0.160862190591214	0.148919412485166	-0.109908127377664	0.229354101679825	0.120588043670401	-0.110684020367828	-0.00838236388781165	-0.258536502639868	-0.165594576579226	0.0746426502024559	-0.00908253553617686	0.0152572807862594	-0.0962020524929938	-0.271597061000698	-0.0400224746698042	-0.32642675805787	-0.0116308941213363	0.236231759605018	0.37730426879792	0.494945053096834
QSF_ADAMTS15.1.1	QSF_ADAMTS15.1.1	ATS15_MOUSE	grey	0.0614860231631958	0.140775971869733	0.0230393180960908	0.257794207769593	-0.196161349052444	0.0932001228631928	-0.168281450195927	0.0583322016362597	-0.0528740352503393	0.665004637459466	0.319521801386036	0.871210051018663	0.0650210058437378	0.163397173176603	0.511071073904848	0.233056267989009	0.681245416995656	0.709690241991039	-0.313278979037375	-0.229878307143483	-0.406824812602652	-0.186921180388863	-0.429175484912551	-0.361321140265822	0.280724716944319	0.451009033340806	0.396765305146677	0.316628446141236	0.149457984105445	0.234352266121513	-0.052727804823485	-0.228384597392899	0.115056752726973	-0.181975275815443	0.0319001647708352	0.0848447361695336	0.0714441347800104	-0.141948928774855	0.101722049777747	0.0671737872971532	0.0358795024238232	-0.249286634188941	-0.0171223234822703	-0.236205011968798	0.0237327139297425	0.101126358823994
QSF_ADAMTS8.1.1	QSF_ADAMTS8.1.1	ATS8_HUMAN	sienna3	-0.0603792855371893	0.106576269107404	0.0921847970839676	0.344059958079632	-0.0597504681561224	0.179096359240431	-0.27393304051802	-0.0633456527893647	-0.0257698767861079	0.670686972852858	0.452053615683547	0.515704665977017	0.0125070384170669	0.673923697504116	0.203946434799527	0.0494017115515908	0.655498745129317	0.856099187479844	-0.288107760507726	-0.284673729171866	-0.34316625956432	-0.140275565271243	-0.368835716206589	-0.368538452674257	0.396431519224115	0.792405356293898	0.407527545757215	0.0559603574278723	-0.0602056858487899	0.155782863490139	-0.0987674768619988	-0.0873722163109648	0.18021296702608	-0.297070838651901	0.0308952819207039	0.219059300675583	0.103149421363646	0.11060904371669	0.295044480964845	-0.0933464664692806	-0.0600618097824178	-0.273268532645997	0.112483107836019	-0.136976646133741	0.0383388281813745	0.0408110863968485
QSF_ADAMTSL2.1.1	QSF_ADAMTSL2.1.1	ATL2_HUMAN	darkgreen	0.0928331876667087	0.160118184172728	0.00438487198157501	0.411769118654559	0.0911891324681105	0.323591833044759	0.0565134549751816	-0.0311626766662516	-0.0120495054208414	0.512743200825182	0.256838561691772	0.975388172852004	0.00242197998846142	0.520268968217247	0.0192798001175349	0.690677288715833	0.826410283433533	0.932435475298255	-0.126238538130973	0.0137243130050743	-0.0371012435026889	0.30681427361522	0.0380864952160472	-0.281649117251463	0.549375616174781	0.149166083769009	0.085576176993836	-0.0317520381747541	-0.198399907650397	0.300445491398335	-0.134587758282496	0.0943720680979668	0.0407489713706405	-0.213165816122693	-0.191212354175575	-0.142150403862099	-0.101600342573594	-0.152472227114534	-0.078353279563787	-0.0148950654338194	-0.173840731230491	-0.439155351175154	0.0650222010873567	0.285585070453811	0.37251891509403	0.923070964198104
QSF_ADAS.1.1	QSF_ADAS.1.1	ADAS_HUMAN	grey	0.0917793473859144	-0.0903433425813306	0.045810005258048	-0.143101312133379	0.079188780432033	-0.0878340603754211	-0.109376530960942	0.0725644669804136	-0.0112057361911175	0.517560884011625	0.524162014923884	0.747089276847516	0.311512277242172	0.57682076898551	0.535796413929217	0.440190091049437	0.609193903196911	0.937156839411077	0.0640286223654812	0.0896965592175976	-0.0745743758824617	0.0420203089240538	0.231045091910621	0.460776651609734	0.0860556249255542	-0.0877745214136653	-0.0373245150208289	0.137824180102448	0.252683081720958	0.276380464936602	0.178752161906735	-0.00794630602785717	0.14060223406444	-0.12175634372848	0.0217728060113431	0.154605755272355	0.0594540933782455	0.016042702159979	-0.290454955497479	-0.377637450979378	-0.0467231705418521	-0.186014047664037	-0.415906530792433	0.0295315275683985	0.652021043698354	0.527148800005006
QSF_ADB4C.2.2	QSF_ADB4C.2.2	ADB4C_MELGA	tan	-0.156809534862076	0.123845020539245	0.00337851058027404	0.0990256203500115	-0.0428745108266169	-0.0857904352177973	-0.295450269549743	0.0564617320536903	0.0203313690918722	0.266927200039277	0.381724093183624	0.981035588814126	0.484899051983632	0.76280787434556	0.545364014761001	0.0334654008771484	0.690946210002371	0.886240963277569	-0.0695447803783545	-0.129388240919334	-0.0629429004207755	-0.00696925842785417	-0.360447743557694	0.0130466750882791	0.155313849973173	0.248697547832461	0.105966038072015	0.110002136857096	-0.160774862662713	-0.10587174870696	-0.271085594830257	-0.194710395135314	0.113349762765242	0.111695481296803	0.0458289763967467	0.166545903109006	0.252036013222014	0.0175802309537135	0.701644487339981	0.1217887181612	0.0275977818496681	-0.0902307540889285	0.0410358388943186	0.0133459674314262	0.624206390503346	0.36061085221118
QSF_ADCK2.1.1	QSF_ADCK2.1.1	COPE_BOVIN	grey	0.157209652387625	-0.239430996324922	-0.039518923964647	-0.143477191637544	0.240756603899278	-0.251397564216443	0.0881287177882161	0.36680150201948	-0.0618174033826473	0.265693323955637	0.0873482076148121	0.780892455289689	0.310229738640382	0.0855583428104288	0.0722119266192194	0.534423715708404	0.0074801802724557	0.663306834188086	0.00976320756269703	-0.232962969040898	-0.428461578219958	-0.523266250071356	0.0252857277141438	-0.00149824058994035	-0.188833926941706	0.0149505620285306	-0.00636587040608159	0.206485822611695	0.505250979582389	0.159657272292263	-0.0527803059355143	-0.232793729262611	0.232992553506503	0.191193618250526	0.359755857526683	0.197375378416789	0.12955027246646	-0.130677659312915	-0.0135284935588501	0.199140335654255	-0.00526166621072987	0.103961437210794	-0.213598621312834	-0.522554899722682	0.945233476491951	0.0965051157167877
QSF_ADCK3.1.2	QSF_ADCK3.1.2	ADCK3_DANRE	brown	0.0570694199429347	-0.0123888722143602	-0.0448446795401266	0.134801420992437	-0.0479255136756092	0.0375678808926399	-0.312815418713588	-0.023883629479708	-0.316013907744543	0.687789074343544	0.930537167586322	0.752247379112569	0.340693874180542	0.735823928217706	0.791461154794432	0.0239516586576017	0.866532517415354	0.0224749579766189	-0.0443171610816761	0.187560080526127	0.34143199563027	0.29161006825606	0.141802656408554	0.178997031727132	0.0467085233111391	0.0525039706191133	-0.219981016540239	-0.289189756377879	-0.531419294845602	-0.40541003026336	0.046426909987411	0.21179876064951	0.014275957876162	0.169417121052425	-0.0806862403808089	-0.10328862937624	-0.0366108583315387	0.0198801245274664	0.0122580836975596	0.092315049852152	0.0191463702967684	0.167302553792688	0.364852737266361	0.31687922911737	0.755070666903141	0.183028433392759
QSF_ADCK3.2.2	QSF_ADCK3.2.2	ADCK3_DANRE	yellow	-0.269923408296133	-0.138837745095227	-0.129253823650947	-0.107941618289189	0.270053658425927	-0.189902161568759	-0.234474479331761	0.00776292039313654	0.0427176022008958	0.0529636120445405	0.326296841054677	0.361114260174231	0.446247447286651	0.0528447236395019	0.177522614959285	0.0943013105455366	0.956441839557348	0.763650807543249	0.6579560976734	0.168953576059492	0.210640488660609	0.114150288921304	0.217473584126122	0.243036821447015	-0.145193363944148	-0.371364275688801	-0.113407688225483	-0.229995685966584	-0.0161501659092004	-0.0349915168801709	-0.470292863051608	0.0236352130089123	0.115182485899156	0.112384740500012	0.0527247969886065	-0.233542891445499	0.110390611347438	0.0551990025167403	-0.0228290356609705	0.0678962253935249	-0.207732889551849	0.102319949231666	-0.174788285003748	0.107091519920974	1.15640862932931e-07	0.231168003709373
QSF_ADCK5.1.2	QSF_ADCK5.1.2	ADCK5_MOUSE	grey	-0.096766860927939	-0.198559710286097	-0.148027062884768	-0.28462967459487	-0.183988044581327	0.0843659261085317	0.222153251068703	-0.168847547285657	0.258348478699745	0.494962532411562	0.158208412558621	0.294973667989279	0.0408436337332879	0.191660247017213	0.55208136754783	0.113449232562681	0.231465177720001	0.0644258996495326	0.276435072898144	0.505368038294981	0.475435196323337	0.375825112189335	0.0789728507218782	0.397392702868238	-0.152871330327731	-0.296217144138677	-0.00508330987350571	-0.419231572493825	-0.194011725339799	-0.129571072728581	-0.0864839020244051	-0.113218065391343	-0.0890909951213903	0.243160922269215	-0.144899727174954	-0.0206710846893358	-0.0158441776637065	0.0411252839950527	-0.0710430448758035	0.0324308346840461	-0.251353681285225	0.0413249091921957	-0.100526443460264	0.364673187091076	0.0472795539417732	0.000132766061144437
QSF_ADCY4.1.1	QSF_ADCY4.1.1	ADCY4_RAT	grey	-0.15356230463631	-0.0175301022871417	-0.0979317679242091	0.202227337362082	0.0979712757000613	-0.00239259804848592	-0.236404322625973	0.124408750863227	-0.195841651202088	0.277082220694475	0.901831658869691	0.489759038687196	0.150509154461388	0.489583064344239	0.986569147136049	0.0915446564878427	0.37954396622774	0.164098112841829	0.0918827382047107	0.17714439027532	0.0784197969812572	0.300273224528045	0.205071510150035	-0.0780839273513323	0.323593581929254	0.0861375306746928	0.0444938440323811	-0.00704511087752501	-0.278803731130922	0.0364730579419811	-0.356646715499991	0.0253318471948624	-0.165369206883464	-0.20041833698319	-0.148616258869306	0.0288248834616506	0.192663849621187	0.164344314537632	0.107259476945789	-0.0122383902809521	-0.0343006720337328	-0.308044902473587	-0.0528331676260517	0.323215078387932	0.517087224912361	0.209000926927437
QSF_ADCY6.2.2	QSF_ADCY6.2.2	ADCY6_HUMAN	lightcyan1	0.000282932621174597	0.0905507279193815	-0.0256613789889163	0.346094651159999	0.120109619644928	0.337671293737954	0.20346378487911	-0.140612431841649	-0.0147037358796652	0.998411685572502	0.523206112774377	0.856698674328085	0.0119621986548165	0.396357407217809	0.0143583838492467	0.147977019215702	0.320089980456252	0.917599329694229	0.0123684203081171	0.466488611819377	0.340162217972984	0.721525593329368	0.408612075505646	0.333543273681764	0.486156061609905	-0.122019196761266	0.0760460756074945	-0.0833674450900079	-0.370727245024101	0.17595366229553	-0.265651214528913	-0.00622713679280058	-0.094983378761381	-0.119040874117023	-0.612643940328168	-0.252820856133148	0.0444339531121553	-0.00966438056016661	-0.236839623756212	-0.218697582089644	-0.0481228964725043	-0.467682767117224	-0.104345093926469	0.68713945798435	0.930651558168552	0.000490714082492338
QSF_ADCY6A.1.1	QSF_ADCY6A.1.1	ADCY6_HUMAN	grey	-0.0578350366030361	0.223603512347769	-0.0625516282319999	0.306048397217358	-0.027085788829588	0.487112887596411	0.164424713956144	-0.135807369292296	0.00531809500900434	0.683818953336205	0.111052404502824	0.659551062420328	0.0273460957887189	0.848834836639085	0.000250092686160016	0.24409630037989	0.337069417063411	0.970152251706597	-0.377155304610374	0.356749600325186	0.192837613301243	0.498287291355162	0.110022295101307	-0.00418721069728971	0.49273228750304	0.236374946773875	0.157160881171419	-0.000466725297074241	-0.481448980146584	-0.0327002281375416	-0.190935440654761	-0.29667373209945	-0.25250272100402	-0.200253873440041	-0.428219190960512	0.0227126131128562	0.111734489339748	0.0356602014297414	0.291620495592423	-0.257897517365643	0.0285160578461614	-0.439144671656643	0.107006525421167	0.529212881309959	0.00584800102555979	0.00943000416042875
QSF_ADDA.1.3	QSF_ADDA.1.3	ADDA_HUMAN	grey	0.208456151038933	0.032524261837246	0.0458516956936403	0.165859362937395	0.0480279169370327	0.352662404142844	-0.291997890710413	-0.150929577892524	0.0172310616318016	0.138073476487029	0.818950562320598	0.74686675439694	0.239948717394544	0.735279991459878	0.0103404137722015	0.0356886878793772	0.285500467190217	0.903498271892016	-0.249136396043747	0.0953918504547921	0.272581632486309	0.231364127590693	-0.0751260002377356	-0.254371656016509	0.0689511579411726	0.270252494415659	0.0369496100146597	-0.0767552589448434	-0.406670833738769	-0.344986127847723	0.0562375420325511	0.161626010816573	-0.273368148154823	0.00331928280597153	-0.0194887992517216	0.0228623611450853	-0.238148485963296	0.111042717138805	0.132163850841343	-0.261152892643855	-0.0165429402720425	0.0243476505523964	0.292251765120256	0.261721897929403	0.074899881812665	0.501141189208386
QSF_ADDA.2.3	QSF_ADDA.2.3	ADDA_RAT	grey	-0.0335222689330101	0.23252374275088	0.340781282538392	0.278355531019645	-0.08667097661541	0.211665678238499	0.0534044624789966	-0.183964992059307	-0.151401256796763	0.813492812688534	0.09715294747533	0.013429799862372	0.0457015986138174	0.541231538928575	0.131973539077122	0.706907933689891	0.191716880082341	0.283980061848468	-0.186526540671179	0.0556887773343084	-0.169281208952167	0.124221903224463	-0.0285897955548453	0.057909018586562	0.340498794158581	0.169983152696031	0.167431263117084	0.167866419119725	0.149012849908499	0.345141104291038	-0.019644587606529	0.0664031929356349	-0.0247443975014354	-0.223036928505739	-0.33664260696563	0.00750595754423745	-0.000574512054788364	0.161403929140256	-0.0504711923244097	-0.336673472389114	-0.194024365191583	-0.383719278077339	-0.208698912652602	0.0687323828891643	0.185496727925268	0.694969497400432
QSF_ADDG.1.2	QSF_ADDG.1.2	ADDG_HUMAN	grey	0.0419057387546742	0.227771678872463	-0.0056559038789287	0.0963570684470296	-0.103961805693141	0.143812324370708	0.0672517034356428	0.0357124865806805	-0.0889643105874365	0.768016561852307	0.104379324506907	0.968257244473435	0.496799810110384	0.463286329397675	0.30908908686147	0.635708881619379	0.801546360165637	0.530540387703434	-0.431426382329203	0.0976341581974478	0.0880576090931147	-0.0291906805083156	0.0190682878247492	-0.200575052840719	-0.0521213381995384	0.16015492734934	0.00638650568212699	0.123001615228915	-0.263210254912415	-0.36332606183966	0.266448092278432	0.0774872149094449	-0.297959324663159	0.0565178987698392	-0.0581511899879953	0.101736687419393	0.00624079344134522	-0.0598794998771544	0.13131782161273	-0.124226700371908	0.334452143187402	0.123675716377647	0.346075834914993	0.0270430246448291	0.00140672169508439	0.49108570304422
QSF_ADF1.3.4	QSF_ADF1.3.4	ADF1_DROME	grey	-0.228517800830612	0.145946445781382	-0.0668219848304636	-0.183846179512968	-0.126304876738631	0.216618823540657	0.321748546963894	-0.187747041315116	0.157262662039595	0.103218104708274	0.30188857306544	0.637874049498143	0.192008955795432	0.372265699847243	0.122960191068216	0.0200192400932972	0.182584467465688	0.265530139784236	0.0965173361758264	0.413341887828017	0.382617924926437	0.399174024861069	0.269828332292006	0.337756587658581	0.0226132559309258	-0.275775322122781	-0.00881234918664391	-0.245857329043024	-0.186870233654369	-0.0510322898686288	-0.25801630255302	-0.203375240362976	-0.18751335967092	-0.0991744741902816	-0.38425279816266	-0.268860002727078	-0.126279070920774	-0.125977339148402	-0.230123998330801	-0.121081410331639	-0.157459964303635	-0.0732723394632611	0.0312776921757427	0.412059008997344	0.49608084087441	0.00232168546224811
QSF_ADHX.1.2	QSF_ADHX.1.2	ADHX_SPAAU	darkgrey	0.351008367748287	0.0483911985304794	0.0287859208364131	0.165726378883251	-0.0978456662056425	-0.0308844489348715	-0.0348775072075768	0.179696036928072	-0.265877716266867	0.0107298467979578	0.733351383564717	0.839467923464937	0.240331137151662	0.490142664684087	0.827936504538529	0.806095574702406	0.202411076454193	0.05676561226246	-0.219901705010514	-0.00983394290194744	-0.111208713567583	-0.0570253639900071	0.0473043470633377	-0.039263411120996	0.00368547951043493	0.0564970513483664	0.313554702342366	0.315967042837204	-0.0164766260013284	-0.04228570808877	0.17198229692094	0.11180525869037	0.217307117412267	0.201268001470091	0.0662517053483803	0.0319538049669318	-0.00907439882018571	-0.0146392089055201	0.0346303832615937	-0.0490967232357565	0.746609741041323	0.0603362649716942	0.133311037916724	-0.0997613122238932	0.117248349818283	0.944837299377971
QSF_ADK.1.1	QSF_ADK.1.1	ADK_HUMAN	lightcyan1	-0.183661930511304	0.0397954293384968	0.0419325383665311	0.270048178043139	0.0279449444188024	0.300367436447665	0.0975379012217128	-0.33504656033876	0.103017937449332	0.192462520543832	0.779397762032074	0.767872333525158	0.0528497216068602	0.844098629466577	0.0304981553858685	0.49151519108872	0.0151842787836535	0.467378276018781	0.136791085887448	0.410980835490971	0.385420521302003	0.736148912702345	0.22825731353209	0.251513329192958	0.480198056561688	-0.175225257714955	-0.1166002137912	-0.256626924406958	-0.425357343190599	0.154349664374855	-0.362674165519529	0.023334271166348	-0.165792460411014	-0.0889949761894949	-0.427329246021916	-0.289242279573607	-0.0347843621356424	0.0351424822944722	0.104678411640495	-0.195505733470079	-0.178298140304184	-0.478758762843806	-0.184702860456188	0.732959541845787	0.333548400322233	0.00247367976120858
QSF_ADM1.1.1	QSF_ADM1.1.1	ADML_BOVIN	orangered4	-0.0428716543293983	0.0500260842994083	-0.101790962524663	-0.0692568691534659	0.142833307423021	-0.0590740579345574	-0.17723258197305	0.18082513602336	-0.08175083069898	0.762823217379968	0.724692356118081	0.472726484265653	0.625645813871706	0.312428803450169	0.677411942307859	0.208770679797168	0.199542438568783	0.564514554798989	-0.268670579866677	-0.369749625503107	-0.209527095932077	-0.268844012819495	-0.277674773066369	-0.338467353494999	0.0389344981633618	0.487629385016228	0.0927713549872619	0.0603048251760383	-0.0270015970442382	-0.03640723958029	0.241198604763023	-0.279059705055827	0.0372674241252479	-0.116352811533377	0.258815112514787	0.681748710838655	0.271527006042549	0.0621028377756734	0.190622778329013	0.283304029877279	0.0658103516496089	0.0960271205430621	0.225774545199701	-0.240117136984961	0.0541182574842361	0.00697935798695155
QSF_ADNP.3.3	QSF_ADNP.3.3	ADNP_HUMAN	darkgreen	-0.283678899782817	0.145446138531144	0.102818436419114	0.294675620823734	0.0401447438063528	0.171841529056472	-0.0900465721515254	-0.108749054060785	0.101887536557516	0.0415512751198947	0.303566811661533	0.468245651755178	0.0339539966336549	0.777510618551601	0.223174651160427	0.525531428147633	0.442833284145359	0.472304351009309	0.104389717828161	0.0857610716352161	-0.0629294597549778	0.391501986651224	0.0322208969380917	0.13851813878811	0.607284226676586	0.084528382182641	0.0196489708259243	-0.0845170734469749	-0.0853923347809295	0.454554443078445	-0.435476726399145	-0.00790992380163052	0.00547084014929347	-0.377829241419482	-0.460856629157025	-0.146769187338179	0.252050250291618	-0.00209894038171414	0.0721537207383131	-0.122167905432769	-0.454636746655526	-0.612377398260033	-0.295452992527808	0.373415520058659	0.461437602746726	0.5455020823568
QSF_ADNP2A.1.1	QSF_ADNP2A.1.1	ADNP2_HUMAN	grey	-0.0867190109654594	-0.062039367603182	0.232666271687887	-0.118113298353999	-0.13188295190167	0.105867034568979	0.138789925652392	-0.0857883335506886	0.185344522590997	0.541006545536891	0.662170552364235	0.0969423576404284	0.404310687069922	0.351345518456656	0.455085907709166	0.326465128972891	0.545373896243202	0.188348769167037	0.156450730453121	0.0408553515190856	-0.114400045780026	-0.0262540867397754	0.14954283077136	-0.00810301054185104	-0.0418493278191213	-0.125065921683989	-0.00670892816883756	-0.0418835987461091	0.313848550055203	0.280370197989076	0.25339310940884	0.035947137546663	-0.0879933301515233	0.00846852657098784	0.141524819957041	-0.146660816651079	-0.551165664843095	0.0830694545593943	-0.27670275482348	-0.341850854908214	-0.181758634669994	-0.17857172502194	-0.439336062476254	-0.0335822397829054	0.268036920273923	0.773675553515315
QSF_ADO.1.1	QSF_ADO.1.1	AOXA_MACFA	brown	0.332399076751408	0.0749910973236288	-0.0981967394337888	0.231769587003796	-0.0328206740362055	0.201249981919273	-0.186241571193839	-0.242758541278208	-0.113303658638198	0.0160580790477751	0.59724400775082	0.488579442491616	0.0982731381830427	0.817328687724027	0.152533246252103	0.186181468686724	0.0829099118517621	0.423848110766326	-0.213186918612127	0.261279800315818	0.602447222082735	0.501228136730001	0.12998235855945	-0.00884987579220318	0.113468798722112	0.0512432321120152	-0.326483450038214	-0.266715953842971	-0.804873093721954	-0.63052849275752	0.0950540563697322	0.23318481417441	-0.05692522808998	-0.134527343679698	-0.150939563758885	-0.131621331743436	-0.0979778815382311	0.164286395685818	0.0336758433158497	-0.00408201551143657	0.106940183458154	0.227282300034679	0.688954560197915	0.550175767729433	0.129154043989798	0.0613507223067305
QSF_ADOA.1.1	QSF_ADOA.1.1	AEDO_HUMAN	grey	-0.309315151537687	0.26351775517069	0.130165654502713	0.278118707492432	-0.13965831442682	0.153820061110175	0.225416159460189	-0.176526145764282	0.0745152887581984	0.0256603298545059	0.0590831929905964	0.357707733662916	0.0458938289691435	0.323417583978567	0.276266942434201	0.108111390752614	0.210620022535159	0.599578959889434	0.00395919759707372	0.207528274922661	-0.0239443473890479	0.401723999788823	0.151552316990815	0.244091827278196	0.46814742292215	-0.165618250065998	-0.108357114713388	0.226155691317356	0.0633271863937661	0.464204377241998	-0.28324222485544	-0.137787377150377	-0.226006607838771	-0.230840539874556	-0.556431416645507	-0.491139814682892	-0.179791127131619	-0.126178519108832	-0.0614949082124644	-0.128584897903552	-0.317302954338914	-0.580885783940809	-0.339862794811047	0.353996320390685	0.97777680718992	0.139875625290006
QSF_ADPGK.1.1	QSF_ADPGK.1.1	ADPGK_MOUSE	grey	0.0702523525895293	-0.176370290501689	0.0949893379158847	-0.228029460130168	-0.128601161686904	0.0121212915130999	0.259667581975279	0.108583111825077	0.00194906633977176	0.620674768365787	0.211029570409894	0.502957359438727	0.103976997157004	0.363564623632857	0.932033895763181	0.0630271360815883	0.443533769921377	0.989058744524629	-0.114843001699579	0.250714728296818	-0.151029920159196	-0.18169355492831	0.358811522649968	0.275714769926887	-0.245143181961679	0.0117494393218668	0.16526069321197	0.143692925664754	0.399886587058198	0.0812033175948687	0.137399894673415	-0.160736280127777	0.00425356566731639	0.153080636897513	-0.00837529343509091	0.0252046963757396	-0.108186888140472	-0.000949257263628885	-0.34082345183956	-0.361729555975941	-0.0796783416202021	0.0109073505349291	-0.307416598236452	-0.193647127960554	0.417537583898817	0.0730154462398927
QSF_ADPRH.3.5	QSF_ADPRH.3.5	.	turquoise	-0.178058915571286	0.161550140694195	-0.0452927273356877	0.0719221087092344	-0.290803262260562	0.198055168255508	0.203302018489913	-0.0570492571611048	-0.0447443013398492	0.20662197820601	0.252552924560235	0.749851939749167	0.612374359078445	0.0364858992996139	0.159289791500348	0.148306496210798	0.687893742297067	0.752784358670947	-0.127851477903561	0.255747425992107	-0.0703385758928622	0.113884742918061	-0.104311539804587	0.119232636464122	0.220337998396022	0.252231136177711	0.554508315869008	0.00656961550178943	0.00862993731896872	0.190607522237018	-0.140918973865093	-0.27943849118799	0.0310792983954671	-0.073758361485636	-0.319885887646779	-0.0131072814511715	0.17545966397666	-0.121157284355109	-0.023174922018593	-0.282470212302395	0.0132905653749853	-0.298878415108885	-0.0320444073757396	0.095371047843237	0.366391659103797	0.0672567712279536
QSF_ADPRH.4.5	QSF_ADPRH.4.5	.	grey	-0.229426729187468	0.220733219064468	0.110778161804616	0.427967751914515	-0.0231635105694623	0.300506506543605	-0.0536884817675842	-0.211189858434209	0.108342582492338	0.1018169872654	0.115834187096217	0.434317649790238	0.00155148851316917	0.870521739590494	0.0304175293459369	0.705419692543048	0.132864856901253	0.444550196135406	-0.111818852828523	0.0561374588673876	-0.00537396304048203	0.340182643365029	0.132774898468601	-0.0939181854700295	0.51808240614028	0.220605532204205	0.0466054305432883	-0.178012052188079	-0.370725904811972	0.111575843750607	-0.146896564562983	0.011730966056732	0.0965822704046689	0.0329841224633751	-0.321365316086864	-0.147159988604393	-0.158994572572894	-0.149626074070959	0.0858051948792968	0.0281692200816666	-0.0759944613539091	-0.395234530906857	0.0814128979376387	0.359158836651591	0.429985988233316	0.692633053568747
QSF_ADPRH.5.5	QSF_ADPRH.5.5	ADPRH_MOUSE	grey	0.106295495406589	-0.119295852365464	-0.0225576606517634	0.141541118056289	-0.0112153233983285	-0.281622389516292	-0.476645727427789	0.141408861945545	-0.084983661728373	0.453252721389217	0.399588310527318	0.873880429367917	0.31687199723859	0.937103181243393	0.0431163491257731	0.000353972576478306	0.317329015888547	0.549163568097311	-0.0418118293728694	-0.530279203823123	-0.471149661710061	-0.570254514655699	-0.364392753539641	-0.287872234212214	-0.0837501000755956	0.350078521325123	0.255935359476888	0.0567426127518978	0.261502319639639	0.0873502029025565	-0.0177461271688002	0.0610798922389777	0.556073606104847	0.000290853930314583	0.498634052840745	0.0800653238817843	0.00712781705222706	0.0572963049716496	0.173868288052297	0.182529719925988	0.216836277428699	0.18487348549227	0.0887197825372209	-0.558653799215048	0.768522018407174	5.26946299374613e-05
QSF_ADR1.3.5	QSF_ADR1.3.5	ADR1_MOUSE	grey	0.189005263466981	-0.00743269015854768	-0.0462649971885625	0.0328461524256964	-0.116022268222459	0.0666167010882135	-0.192588722205941	-0.00895339600510705	0.0941105180363974	0.179616757156273	0.958293105316033	0.7446618696376	0.817189313251807	0.412739725045915	0.638909446029226	0.171355428526582	0.949770011533489	0.506934356193023	-0.336338167144866	-0.13820810251556	-0.137743171761331	-0.392417631051939	-0.309244053610909	-0.441041659734037	-0.219764241805479	0.312947463620326	-0.029002056897192	-0.16747946996934	-0.00783042513914391	-0.297162547501788	0.180806198960694	-0.0764275968858006	0.188055502477076	-0.0955450683387069	0.298861912012621	0.178841700534975	-0.0460846737837916	0.0613621840347706	0.188620744618763	0.189130222315211	0.0361661014188395	0.388054055952712	0.501961573001405	-0.362388455920907	0.0147729316502407	0.328517080971677
QSF_ADR1.4.5	QSF_ADR1.4.5	ADR1_HUMAN	grey	0.0295214234059915	-0.373195317096352	-0.340592332927966	-0.434760984045211	0.100842690321086	-0.124860151132089	-0.106969096357723	-0.118510170274364	0.212162952822909	0.835422399623822	0.00643123270475082	0.0134847107359711	0.00127870307796555	0.476882140185035	0.377803620599035	0.450378882798917	0.402722232908327	0.131046839935369	0.219087614291156	-0.0617438677378453	0.247850116335317	-0.202776648165158	-0.169525842914453	0.0322396811409664	-0.480427809291057	-0.0648717696591066	-0.229238162685178	-0.369360836981987	-0.0400392758705437	-0.373785078785886	-0.0357202047338441	-0.0316795482355858	-0.0506139380553248	-0.21220423519964	0.200138968473289	0.0319447848196426	-0.00066935050866989	0.291505443123152	0.0723078269952148	0.237732834775813	0.132670112218056	0.527606316751956	0.315740067497696	-0.156593120368448	0.118645574036963	0.66368344455141
QSF_ADR1.5.5	QSF_ADR1.5.5	ADR1_HUMAN	grey	0.230566884422912	0.0568618494182001	-0.118153954835411	-0.224561767416071	-0.169035479699901	-0.2284953131602	-0.123186195492682	0.226249140933053	-0.0823631600584912	0.100080243148481	0.688866880507198	0.404147795234102	0.109490102307291	0.230938626836869	0.103252957007895	0.384281400092465	0.106780093999965	0.561591620323219	-0.217181663242353	-0.179572578687282	-0.0177535067400378	-0.430218312986654	-0.367535456841082	-0.215103563714332	-0.398427876528755	0.107446614407425	-0.111448018628859	-0.0684104299511463	0.046812913213803	-0.356758039702967	0.5551217252185	0.0663838200363633	0.188205548948507	0.0482059590497694	0.494441120591753	0.471881968311608	0.116686003950385	0.0922785131652236	0.0618812474514849	0.314154122278879	0.122211463365905	0.56801772967196	0.508882699707496	-0.40674358294722	0.121966232151723	0.202726497784593
QSF_ADRM1.1.2	QSF_ADRM1.1.2	ADM1B_XENLA	grey	-0.0911031923152705	-0.167932932536576	-0.100938188123281	-0.12464201711219	-0.0113064636125934	-0.382484533253214	-0.29226476939508	0.221420915693073	-0.142524854181605	0.520663877417606	0.234039554734772	0.476462759630548	0.37864402665649	0.9365930969337	0.0051363318751993	0.0355125745626887	0.114674468057893	0.313485785994509	0.1180733373553	-0.27732978225235	-0.333723551127354	-0.502796590705334	-0.131254592068435	-0.0386209523563479	-0.330444272702893	-0.0843091282359909	-0.0487746822210781	0.064499743133717	0.411501402820951	0.0884570768162126	0.19075052390756	0.134687977130334	0.230671697165744	0.264548208078073	0.355570058647667	0.194236480393791	0.151594934023303	0.120734546980097	-0.0770962952616319	0.281553705130926	-0.115166266433478	0.246143126529539	-0.173630900589464	-0.532933480585167	0.404470829536711	0.0465389710875062
QSF_ADRO.1.1	QSF_ADRO.1.1	ADRO_SALFO	darkgreen	-0.177182930202155	0.134551875543735	-0.1067570797248	0.280557742885199	0.12656483764969	0.149625784492558	-0.0712358512077255	-0.0124633257772065	0.14072568358384	0.208900286593188	0.341596725763372	0.451282345622844	0.0439453632473794	0.37127442329961	0.289730812914979	0.615780010067167	0.930120749400724	0.319696447340031	0.237506455822604	0.219407227751048	0.0467128060039921	0.470447282148293	0.050213863350903	0.245037703196218	0.591768595160479	-0.00374328019100129	0.143283240486591	-0.037117034092534	-0.139507132869073	0.438443122358861	-0.413969022448372	-0.238632746896085	0.0520374884291078	-0.0877303117633433	-0.459755937829243	-0.292832263032458	0.0242532208426073	-0.36171337725305	-0.0739396226461047	-0.000812162272952407	-0.351459852608719	-0.598028890792978	-0.271263607518524	0.415588912412492	0.0899987438213485	0.118095519850911
QSF_ADSL.1.1	QSF_ADSL.1.1	PUR8_CHICK	grey	-0.079161159258734	0.105070741817393	0.327234165497601	0.12875563046409	-0.171272279780963	0.000135993510194842	0.0349526381509407	0.0982315766765008	-0.169917619119003	0.576954106198218	0.458503605173422	0.0178865429291309	0.362983774814923	0.224734857477722	0.99923656537107	0.805685976112039	0.488424465105858	0.228478070959865	0.130064152742383	0.217584539559072	-0.31707364921912	-0.0108859174260109	-0.0303306083700203	-0.0455731753513188	0.228186795006308	0.138987512009839	0.331012506554505	0.502164674367952	0.422068571620928	0.446324429544833	-0.131236270481591	-0.0541370789456429	0.032262455982511	-0.00120168295891419	-0.135205833521578	-0.146433941260527	0.013796063516972	-0.28596670611244	-0.196266409947649	-0.541285312571992	-0.169511551272921	-0.380374019384291	-0.352692880904339	-0.120617889186448	0.358085962927628	0.12125851222098
QSF_ADSSL1.1.25	QSF_ADSSL1.1.25	.	grey	-0.202514568438977	0.202366203546659	0.0296240757491603	-0.00196872273442141	0.110772566910553	-0.0707145730944063	-0.0843456464261262	0.143949677712192	-0.0731034526531294	0.149918094248303	0.150223182801387	0.83485810860502	0.988948408431384	0.434341003238156	0.618372304623263	0.552177281158969	0.308622371036088	0.606530778829132	-0.0415913470405657	-0.177142370874025	-0.324558606432161	-0.0495025985304925	-0.106948732497631	-0.00944957414966017	0.289735823450829	0.127529352809283	0.268332489680382	0.129985637046742	0.152206024903402	0.355507203653259	0.00829700820778474	-0.402319772934183	-0.107536653567278	-0.278262971528162	-0.186317822553969	0.320142066478705	0.289169730626517	-0.158915547859701	-0.0266889952846047	-0.0603148863150048	0.0267589303539528	-0.33806133286725	-0.250297226621161	-0.0766282104389721	0.769709114194319	0.209006201182556
QSF_ADSSL1.10.25	QSF_ADSSL1.10.25	.	grey	-0.000878345169114378	-0.0780632559719358	0.0913384920874645	0.0152667581216272	0.0294209055542952	-0.130578931233435	-0.229872924739261	0.173517912096296	-0.0211896314263705	0.995069212656625	0.582265443880237	0.519582992473037	0.91445565084574	0.835975036729526	0.356170246182176	0.101134569135204	0.218623701085933	0.881472484340686	0.269507962261474	0.165981416658681	-0.0573726550847317	0.0808370022579125	-0.00967068807218632	0.0755874536092065	0.150961116911183	-0.0234631414657003	-0.0451907901087641	0.246450277186295	0.128931591664606	0.205301749577494	-0.248424443524222	-0.116947841430755	0.0696168181720507	0.0739464645297904	0.0652929569032852	-0.132439928587668	0.0891071234168801	-0.0715743926438993	-0.0148884719508774	0.12632525434528	-0.257377052496258	-0.190330280379724	-0.261568587145729	0.000433692336054305	0.053344267233826	0.23959809599979
QSF_ADSSL1.11.25	QSF_ADSSL1.11.25	.	grey	-0.156121602792042	-0.0309485055970307	-0.0377430459536489	-0.189098325394615	0.0483966184136244	-0.106990116476893	0.0879795307990861	0.218217192334814	-0.0162182721189956	0.269057554498367	0.82758506501025	0.79051074372329	0.179398645366805	0.733322622529462	0.450289364290959	0.535118506711685	0.120153442984927	0.90914577087156	0.00356614139161911	-0.313656433763057	-0.450555180528394	-0.301618055611403	-0.138942614067515	-0.0101314749699688	0.0276494094200758	-0.00678177372592541	0.192122990216758	0.266688328979213	0.484123403557245	0.442710606655236	-0.12937373057513	-0.471329042721872	0.00750434411793609	-0.127566665910662	0.0774242793075672	0.261241719026912	0.210925244237275	-0.0925731505766564	-0.0318957917696722	0.0705231416186719	0.202700460646155	-0.178592977045137	-0.409776905903319	-0.331339947366488	0.979982579555571	0.0235556834534517
QSF_ADSSL1.16.25	QSF_ADSSL1.16.25	.	grey	-0.210824062936868	0.274796750707243	-0.0813720578119308	0.0948396269363343	0.0175043617783354	0.0475931775729642	0.0166059354482267	0.0239521140036724	-0.0880304259535973	0.133553140940677	0.0486605485621938	0.56632616113039	0.50363372729374	0.901975099444827	0.737590085871525	0.906983548173026	0.866153305653442	0.534881429082237	-0.120770626994828	-0.249741841532321	-0.353265603316373	-0.102483471408886	-0.115288085952127	0.0125225852927718	0.261629795717229	0.110134281322752	0.387397162385574	0.167507879089655	0.16304955532798	0.340027237620604	-0.223297246689116	-0.493143579088598	0.0116694552593068	-0.216654601437857	-0.210873209890907	0.194423369190534	0.213958745177013	-0.0817590642957536	0.0674309849031576	0.088918268013753	0.321915113874449	-0.286857291048592	-0.152756152813362	-0.125134310120712	0.393744298992616	0.0741725140108271
QSF_ADSSL1.17.25	QSF_ADSSL1.17.25	.	grey	-0.0300856738286799	-0.260659867344805	-0.0327697586875086	-0.257547863294674	-0.0339655492493754	-0.411346541456671	-0.281714070688077	0.336416096811493	-0.0299578380781514	0.832321676816172	0.0619910525755131	0.817607226806702	0.065286906777077	0.811071465763477	0.00244957435889564	0.0430455626053874	0.0147484203884812	0.83302395219089	0.137756569046931	-0.373324268014575	-0.45482312373419	-0.503452545568838	-0.315768603255461	-0.0917216847064195	-0.185634197152337	0.170515756924603	0.108261493896767	0.246681140987856	0.462194286399118	0.174002580017841	0.00609662502632871	-0.183226287162676	0.320059849632609	0.249486344580903	0.459082501414597	0.321962226475318	0.249945264617398	-0.129566041566305	0.199563064607484	0.220573556289634	-0.0381882760417372	0.0968136439469161	-0.265049901096654	-0.524911252687274	0.330115108040059	0.00641147008284166
QSF_ADSSL1.20.25	QSF_ADSSL1.20.25	.	grey	-0.205009680799678	0.165696460189303	-0.0612825714065267	-0.0212384838536615	0.130037611210598	-0.0390986813648448	0.00851699474623681	0.179597759337661	-0.0396819097253482	0.144855727503509	0.240417231128307	0.66604783491342	0.881201185419401	0.358184905714101	0.783165644970619	0.952215379492566	0.202662136007317	0.780011314782522	0.0192642101678434	-0.206076675780894	-0.296419106033882	-0.101252377180438	-0.138930195896934	0.00814043938390551	0.169421888448487	-0.0494647193451183	0.239574292521673	0.0855003409861094	0.221830299107613	0.344456906294354	-0.138410620682862	-0.481110837511559	-0.046401626113356	-0.152419343494649	-0.135935874813703	0.257490901142691	0.25563084549058	-0.180918892415423	0.0188164044619381	0.177340805317676	0.125579091079579	-0.228861024591982	-0.222053429917591	-0.133764574092691	0.892175621551932	0.142730082105643
QSF_ADSSL1.23.25	QSF_ADSSL1.23.25	.	ivory	-0.00149757732788714	-0.0493794413577444	-0.170987042910592	-0.185657476292449	-0.255013071844499	0.109121766744191	0.129193083331041	0.0614668122849209	-0.00568070394466546	0.991593113182966	0.728113232025396	0.225519473776893	0.187590622187187	0.0680737234034939	0.441262204001853	0.361341879703187	0.665103114255252	0.968118130206262	0.0876928610237775	0.742785717981287	0.393162842690439	0.266574527249184	0.320327802136977	0.187022557576713	-0.181823161172776	-0.137111783390045	-0.0100208381561684	-0.0483509258297962	-0.111176368966608	-0.220837839387944	0.0580573365503508	-0.256840578944459	0.00595764372337914	0.176883247335272	-0.0232135676866433	0.111712864985723	0.0965080301593595	-0.0165543504364255	-0.395151769628584	-0.175132811652005	-0.0939207441275054	0.131820650621816	0.041022839392399	0.232962200945743	0.536454818363778	2.89299841351988e-10
QSF_ADSSL1.7.25	QSF_ADSSL1.7.25	.	grey	-0.0913293924397385	-0.262516163713306	-0.131211778655921	-0.521619485754226	0.107781322041482	-0.477274337517565	0.0432434493166656	0.306169892159085	-0.094235598220616	0.519624772196189	0.0600895378676619	0.353823746643152	7.3253847254839e-05	0.446926968772952	0.000346772658907098	0.760826965463435	0.0272817815391313	0.506367344187022	0.375570444736407	-0.078582511848014	-0.00447362985926556	-0.330148257055719	0.220789867398052	0.199299957698076	-0.638537747497287	-0.525724708551685	-0.287886010119437	-0.0171306384763147	0.353399564431182	-0.171863137940653	0.011885064635948	0.146648358720279	-0.0150530148367762	0.137326745626822	0.205901560031762	0.0215712392523132	0.142198584739618	0.0686161128625825	-0.139613844551971	0.179938111751264	0.238074959424312	0.484941426890894	-0.137550246939131	-0.30424622150091	0.0060756256352047	0.579750675311794
QSF_ADSSL1.8.25	QSF_ADSSL1.8.25	.	grey	-0.0419283950837632	0.261065912236482	-0.0105161893649533	-0.0841234617901859	0.0975672716956535	0.132997207057053	-0.13719620095381	-0.0107020607369961	0.016599168293257	0.767894631053191	0.0615710450853569	0.941016841201119	0.553228631949824	0.491384122536993	0.347254878305229	0.332105086190567	0.939976219228501	0.90702128682632	-0.191555565387579	-0.0772058596321232	0.213098888395253	-0.0858673659304065	0.0579283631262431	-0.285613690608102	-0.244341867429937	0.150240404003989	-0.186896892156304	-0.171666425147551	-0.340311462952186	-0.512189552190048	0.250951542339504	-0.0578810749324614	-0.0220461116944824	-0.0763519962280233	0.096194655368515	0.341958955806826	0.0418994072381369	0.1499532356731	0.0720773883382055	0.286230337567612	0.244349151774385	0.472604245996943	0.563909436355504	-0.00946823197087667	0.173708437800334	0.586428609532841
QSF_ADSSL1.9.25	QSF_ADSSL1.9.25	.	grey	-0.298330764389706	0.194466997736462	-0.200153340507757	-0.134776762702647	0.0636041690019569	0.0963734037005571	0.00352900994329676	0.195913198913373	0.0682604388023983	0.0316994502462608	0.167137085693144	0.154828210452124	0.340783021443946	0.654181515670079	0.496726504688654	0.980190963591887	0.163941053554853	0.630638168963245	0.323914477969091	0.442089575839642	0.311928039268571	0.316533927416789	0.262927925251132	0.357208488788008	-0.0525278405831659	-0.390696313743226	-0.19887250517336	0.0192575804284395	-0.0403064268147967	-0.0128688816101089	-0.0720551931087109	-0.175566040476952	-0.0987861123708765	0.00971863382620123	-0.306795917135263	-0.177454978823744	-0.0465990329792343	-0.113700532086124	-0.304458539652177	0.0589134586262035	-0.268304427031837	-0.028692316770639	-0.106943586572919	0.281562586659304	0.0191527797819086	0.00103327461325433
QSF_ADSSL2.2.2	QSF_ADSSL2.2.2	PUA1C_SALSA	grey	0.186894717655181	-0.0783764263919773	-0.0510727340972764	0.212693200768874	0.0709210150436905	0.0310063345382779	-0.133305634568135	0.102368262902659	0.038316048760029	0.184614727609506	0.580748160808638	0.719166663343753	0.130064092145085	0.617345124071811	0.827267821905965	0.346127796664718	0.470206054229423	0.787403860123802	0.0793953165451386	0.113708499551659	-0.0537451935584657	0.291707426959497	0.0436167608971518	0.255713114074974	0.422546129247205	0.0835426131922152	0.378687745824067	0.192127556015798	-0.0488079074169716	0.315295481410576	-0.176172036457625	-0.121933852961387	0.254543661525593	0.0593595076164907	-0.122896103980101	-0.1001422785977	0.0718979428342473	-0.128596991555015	-0.115357265160106	-0.139586817446388	0.0527993044016601	-0.463732481861238	-0.314070047834038	0.23462337206239	0.575824192532907	0.422183247487701
QSF_ADT2.2.2	QSF_ADT2.2.2	ADT2_MOUSE	grey	0.0556370248211034	-0.0864228298987053	0.145571777864505	-0.204017278556635	-0.270138483921226	-0.168390652172083	0.0708181200892817	0.165165447266526	-0.0425196503716049	0.695239172373984	0.542394581934042	0.303144800970389	0.146853794830257	0.0527674138070461	0.232748757503128	0.617857001632471	0.241948779153891	0.764714617618449	-0.0945670885302075	-0.164882290557122	-0.211179635229796	-0.42903881290427	-0.187429912422824	-0.182717286135494	-0.372814422685701	0.0271931979692375	-0.0269508643049279	-0.182009178696402	0.291681229367544	-0.0529265655331259	0.415419510633119	0.174734872862345	0.104148843400727	0.086412180748442	0.334381798583231	0.169237639334535	-0.0154001708949126	0.0100088176082818	-0.0792847426195696	0.109791116282525	-0.0815410544076841	0.342884963995048	0.111572231134627	-0.427189128999889	0.504866202081573	0.242768175135053
QSF_ADTRP.1.1	QSF_ADTRP.1.1	ADTRP_HUMAN	grey	0.232645909611812	-0.116622636262893	-0.131450105938893	0.332130417685164	0.0213989224867933	0.0837232321842377	-0.293185924943894	-0.0414626344256769	0.0959907665159912	0.0969724213953687	0.410309342080494	0.352942527532011	0.0161490979858984	0.880310294687843	0.555124866739505	0.034910217533809	0.770402356142435	0.49844507904523	-0.105045657925692	-0.139069170323195	-0.0381074411492375	0.0227741549367414	0.0399119630773414	-0.146697757788654	0.203612505618806	0.375548151187323	4.3962722521735e-05	-0.1986936930411	-0.283675957955462	-0.148609237652881	0.156053694800779	-0.0122603372278231	0.322727850174554	0.0237088523910742	0.101875277966588	-0.0789040892226677	-0.152393882718818	-0.0925186030688094	0.00851325389665957	0.03883264587316	0.0141051489572235	0.0237521017142669	0.324011360751951	0.0378603091587012	0.458611491728462	0.325483173611689
QSF_ADXL.1.1	QSF_ADXL.1.1	ADXL_DANRE	grey	-0.0240507259889935	0.163426049538038	0.210007056096353	0.205421447367269	-0.235065218574019	-0.072722753364268	-0.180311417363148	0.166315993313368	-0.0392452239180775	0.865607324938866	0.247012101035819	0.13510008289735	0.144032645657293	0.0934507127580379	0.608411288270706	0.200844023101758	0.238638760740428	0.782372757421451	-0.107936284979927	-0.357503649404414	-0.613337789342578	-0.478270399478605	-0.389665931501154	-0.345746542630511	0.153625745459244	0.379153525739278	0.232126021290719	0.169944136694936	0.452741216086222	0.398260377694914	0.0392479457869386	0.0135937358239967	0.460769119586712	0.125370119705603	0.192753554614748	0.177921568529387	0.0564249503589312	-0.288699595654982	0.0816844255003263	0.15947197178658	-0.0432297283046012	-0.0852597900137995	0.0251079766261822	-0.552607246847674	0.446270046862233	0.00926984342979582
QSF_AEDO.1.2	QSF_AEDO.1.2	AEDO_MOUSE	grey	-0.0514183743081362	-0.20534310971559	0.0606498675292469	-0.161041203599255	0.0596335953769783	-0.255509104441363	0.30299245296991	0.147618240841179	0.00752489254130219	0.717344992896119	0.144188966704925	0.669296017807773	0.254070528668145	0.674525926884746	0.0675210365292181	0.0290059829900843	0.296324193198967	0.957776197772128	0.39179238918176	0.089863619250485	-0.0852322178489888	-0.037878857428934	0.285953711308648	0.42719934290495	-0.130376157539707	-0.387026087913243	0.0503861249295013	0.211545785764868	0.415713967364243	0.32649029434161	0.0172775201130685	-0.0472879551464659	0.23471945813997	0.0929263863020788	-0.0845364905176497	-0.21109617840931	-0.110148738647818	-0.165247624466538	-0.49000194042551	-0.0198098948048482	-0.0699503645438367	-0.0466215051268025	-0.403551874269334	-0.106188756553731	0.00407389120348087	0.526376526583747
QSF_AF10.1.2	QSF_AF10.1.2	AF10_MOUSE	grey	-0.0690959863647009	0.146616741233049	0.0564801822139867	0.207820599790577	-0.00982033686673595	0.0933366989815808	-0.0334388968299179	0.096152622805307	0.0564839469517183	0.626450757114225	0.29964952641277	0.690850278349282	0.139305979913807	0.944913503540422	0.510449401497835	0.813948413199103	0.497717744749295	0.69083070417762	0.0891026149589694	0.0863490179492484	0.0189095281638624	0.301204391087959	-0.0953834748505578	0.0251897950916285	0.40330798026266	-0.053881623439335	0.290468540420569	0.110994508030497	-0.143024817546611	0.265585040426708	-0.316922682733664	-0.168455893923468	0.0740853031526568	0.0675246164514446	-0.188939362894865	-0.14812336139485	-0.0124207260135272	-0.323091632343158	0.290191003783707	0.036634566787182	-0.0493727317699606	-0.434826254275691	-0.17387824937536	0.267538170417343	0.529898975522841	0.542740765380842
QSF_AF1L1.1.4	QSF_AF1L1.1.4	AF1L2_MOUSE	grey	-0.145776392115172	0.1439962966349	-0.189042678141339	0.122762626069077	-0.160188578307238	0.0631977920877045	0.0931458538510512	-0.0430830272518342	0.0204257771075256	0.302458330767	0.308464066373747	0.17952904439764	0.385930888607141	0.256626745318882	0.656252614254996	0.511318204098717	0.76168811952015	0.885716236603103	0.0353009215810192	0.206144392964728	0.0755035681386226	0.19342162515358	0.234507015144135	0.0607944066504057	0.0918777297509934	-0.190941674206015	0.186526360622888	0.132779217332271	-0.136688525544503	-0.071182607308503	-0.222809363962048	-0.175080248328907	-0.255417750008351	0.151758969834655	-0.296510817969333	-0.0900640682145824	0.0678877490137118	0.0327820387750124	0.143193523891093	-0.0442995261957969	0.225291329708537	-0.189343789079052	-0.0765637591927384	0.193736402611288	0.803787882696439	0.142595964983488
QSF_AF1L2.1.1	QSF_AF1L2.1.1	AF1L2_MOUSE	grey	-0.191877910573577	0.148313506383632	-0.25776456063191	0.0889751165919485	0.118377909608296	0.163254903728537	-0.021040789326983	0.0917750850640834	-0.0549248973927376	0.172971800022764	0.294029800905193	0.0650529606472889	0.530490259092401	0.403251194244301	0.247514159576593	0.882299152711087	0.517580415441603	0.698953751082675	0.0587283015233136	0.1706084421778	0.042195538145612	0.30066706128082	-0.0568553974973477	0.0777628584534417	0.353645736735908	0.149586165039125	0.297739924757617	0.0402834750033589	-0.234035207109465	0.117586643558105	-0.0548731345331984	-0.245927783794168	0.0253288135986552	0.0407057616387276	-0.21519425559755	0.101289392385858	0.0912025559263767	-0.0617477376864555	0.155633791072576	0.07749850462383	0.0208782096814287	-0.381930115820456	-0.15981816027816	0.292614096128042	0.679197606369265	0.22656383728106
QSF_AFAD.1.5	QSF_AFAD.1.5	AFAD_HUMAN	grey	-0.190537038208705	0.140540429686489	-0.144826167039967	0.128023878541487	-0.0612650468144972	0.155831485299807	0.0234346780050606	-0.0130937323734073	-0.139640559215813	0.176050953370366	0.320340336971241	0.305654777041221	0.365740367245543	0.666137721483739	0.269959359363455	0.86901918059752	0.926595644771213	0.323479713932999	0.145676978120493	0.289007596514334	0.268226860263321	0.456932266127266	0.00596274217670465	-0.0231456029488068	0.273119644758251	0.0601323254005384	0.00431050038660457	-0.0273026738881423	-0.278932355803615	0.0380191421212475	-0.0598357967637302	-0.0364317547358542	-0.320062664864528	-0.226323113970531	-0.325523042221494	-0.0590621310811421	0.0827309518383312	-0.00347814115148776	-0.15767960998913	-0.238373686352455	-0.226765630535037	-0.29854321975788	-0.0722076663250534	0.440826986210382	0.302791734234199	0.0377118318872561
QSF_AFAD.2.5	QSF_AFAD.2.5	AFAD_HUMAN	grey	-0.189920602433236	0.0168445725625713	-0.238585204232218	0.172971716619429	0.0840787793769932	0.128251303244921	-0.104898750948527	-0.153139244250066	-0.0720471826376395	0.177479743665677	0.905652862195638	0.0885054353839148	0.220099324886241	0.55344017855438	0.364882279034944	0.459243619949218	0.278423793861953	0.611754532839348	0.191000871807313	0.112114868497409	0.217362125409565	0.301911707670025	0.146147228312659	0.0491203043868689	0.178218941224217	-0.0424431504482101	-0.0342421637497668	-0.134142012556664	-0.285020221204584	-0.0431397937733808	-0.328218506315831	0.0451854646639444	-0.0135430700968631	0.0642296505316156	-0.104632868485447	-0.261361800138093	-0.0930758522961384	-0.0536928118544694	0.0901022638738694	0.0392183603920583	0.102192135537732	-0.170302793116586	-0.0937868136745621	0.326766524235488	0.174981364147024	0.428758343174616
QSF_AFAD.5.5	QSF_AFAD.5.5	AFAD_HUMAN	brown	-0.0649327973142091	0.197908202692023	-0.0205005735384161	0.0122276047694189	0.246075210408881	0.129127105462604	-0.129468039091878	-0.232851306036215	0.164611227668511	0.647428231850533	0.159605798340809	0.885300547040078	0.931439198206102	0.0786643925758128	0.36158922534218	0.360312201068315	0.0966694932546759	0.243554344542467	0.134490778699728	0.0149141970882591	0.463089821469814	0.366522648073116	0.0862837608835157	0.00977453286217297	0.073272756242756	-0.120217120551684	-0.336461116365515	-0.223763717113234	-0.548470565464681	-0.361134917313173	-0.0803518306825545	0.0365984605401671	-0.334096681346812	-0.267961800100018	-0.207624740991706	-0.333604449773852	-0.159205264850008	-0.0457440236741646	0.0274265800656751	0.0236412342095642	-0.186630774801657	0.115543689642346	0.376126711668984	0.427776444631679	0.341817999233693	0.91642405422557
QSF_AFAP1L1B.1.1	QSF_AFAP1L1B.1.1	AF1L1_DANRE	grey	0.0994071839297204	-0.059551522178751	-0.220317832256763	0.0275836135957044	-0.140131316087642	0.239842262909356	0.309702656034897	-0.108497832820699	0.20979990198486	0.483209744694632	0.67494895969054	0.116539005105557	0.846089856880598	0.321765208888102	0.0867897997262998	0.0254662734569132	0.443893993623119	0.135494438792068	0.0199839048047737	0.587140182763678	0.38866028842229	0.45985925950268	0.0604559520102707	0.158235121313102	0.166294816364669	0.24621494365816	0.145015525529794	0.0105292794141155	-0.319069801176903	-0.123415954769408	0.158532603739444	-0.0861844610398717	0.0400144901431406	-0.175546109658777	-0.287532067311955	-0.0913101509971105	0.0140254940792438	-0.0356297264321983	-0.282946580353349	-0.308085705482504	-0.0312475146850642	-0.131823571959878	0.121335816682579	0.4252694289898	0.888172610160655	4.7567719029767e-06
QSF_AFF2.1.1	QSF_AFF2.1.1	AFF2_PONPY	grey	-0.0607864438410252	0.256911433958591	0.265775294390953	0.353288842506119	0.00614846126924501	0.242086655404938	0.168318641206649	-0.0526637546061365	0.128870020865403	0.668594350197438	0.0659778859517363	0.0568646488722808	0.0101961394636127	0.965494458367064	0.0837914934338105	0.232951507521292	0.710794292389734	0.362553995887776	-0.0381305463448603	0.282099532637131	0.12307645473569	0.469067282894915	0.0143505472588336	-0.0621143473854125	0.499897683641785	0.202817082061699	0.207982815821378	0.174120724118313	-0.309848099767391	0.0907022778910092	-0.173907641740122	-0.127651184836047	-0.143504362097973	-0.0958377836865193	-0.492008618439803	-0.254135882843815	-0.0741611930040294	-0.0999449910009939	0.152412252583849	-0.144486061909658	-0.182453782506081	-0.463012659649731	0.0382824118664465	0.434235939625958	0.788409317873702	0.0427489906868971
QSF_AFG32.1.1	QSF_AFG32.1.1	AFG32_HUMAN	grey	-0.0470805368888251	-0.340633542628506	-0.0481139912795107	-0.0286163054000444	0.157802876244992	-0.369645961525185	-0.121835052464797	0.158499873577054	-0.171054627650708	0.740317082573385	0.0134727183644775	0.734822888772841	0.840401456100311	0.263870968344447	0.00699646001759693	0.389557711626198	0.261740530116913	0.225333393609883	0.260558325353582	-0.252000970405536	-0.280478343190252	-0.276627491070369	0.115202917117839	0.279158940753606	-0.199694313171059	-0.298589214813853	-0.110976758771932	0.232630140559877	0.462108542430191	0.249400043623926	-0.270282331070894	0.120953275155651	0.036244271113083	0.00983925775572506	0.087015640536996	-0.297179211922454	0.0416320163491918	0.0858118860632964	-0.0390117068915021	-0.0303358005767218	-0.0749177375694535	-0.0204421723814961	-0.513688883555575	-0.278940623576534	0.0620964447568411	0.0715077327292564
QSF_AFMID.1.1	QSF_AFMID.1.1	KFA_SALSA	grey	0.105966972165315	-0.0892183895095391	-0.075751971302643	-0.104501474327829	-0.0677951753088539	-0.100826729102312	-0.115032359491423	0.149366271280721	-0.352415598137334	0.454657959181562	0.5293623435304	0.593518502374087	0.460955435437545	0.632974879501123	0.476952253313871	0.416765039270526	0.290577698847501	0.0103977371314187	-0.151741283016363	0.0292771348173915	0.13909417984185	-0.0475180686363508	0.182471793082388	0.158247846119595	-0.1755389067419	-0.0614194211681597	-0.186648386073861	-0.185862853966285	-0.253801143873902	-0.389086841670437	-0.194224756618565	0.0956908003388019	-0.0138718649862332	-0.113441563567101	0.0606973191397744	0.018701644870908	0.277795607755934	0.122881966164336	-0.0700274454756172	0.00365028713086183	0.0399965015752118	0.310412997872042	0.30364507825666	0.0275618571566296	0.282887327340472	0.836765610284768
QSF_AFP4.1.7	QSF_AFP4.1.7	AFP4_MYOOC	green	0.336542174023817	-0.0895943180056255	-0.0416468166527217	0.0197861471204206	-0.124205798634479	-0.0391181874940078	-0.0185007602162377	0.206266988650317	-0.0600039090603977	0.0147088388365605	0.527621709883833	0.769410411656138	0.889272286361226	0.380327991123079	0.783060091902337	0.896424915947991	0.142353397022621	0.672618447641771	-0.219259481493167	-0.112972822601935	-0.0354260846777977	-0.110710034620897	-0.273679955928247	-0.168211426697435	-0.0543926850329694	0.260778932602045	-0.00364033770079864	-0.0796203220881036	-0.0521637433818537	-0.108606133166138	0.766620895910811	0.195858240681513	0.0140875245693913	0.0852626038969931	0.222659575035576	0.266244388550866	-0.107295573643651	-0.0498608459624108	-0.0231173502913453	0.022142378423887	0.0395257273921193	0.142932569881199	0.217540878425514	-0.130468290269855	0.118349549336312	0.425211397679251
QSF_AFP4.4.7	QSF_AFP4.4.7	AFP4_MYOOC	grey	0.00955106233874087	-0.0884055608297384	-0.0718715932242366	-0.2094768527262	0.0697562002371857	-0.21724476368458	-0.308332644395876	0.0560687762747903	0.000366967829693586	0.946421745725624	0.533135578066729	0.612624773912384	0.136111142013721	0.623150273224443	0.121855179327504	0.0261579195031626	0.69299052508657	0.997939933397396	0.0378884761989621	-0.176324196709681	0.0369701367909634	-0.236819136284228	-0.281276264032741	-0.0485051966512332	-0.220089300885884	0.0620291063264057	-0.0734838736306916	-0.300832561750231	-0.0864769244461053	-0.209361711318213	0.0381280945677741	-0.107950679047292	0.0654851439727984	0.209030497381992	0.32448406216089	0.347959939626251	0.224399646713271	-0.00997355357583145	0.156005043818616	0.350157925142359	0.0908960672212338	0.401751942803838	0.389360494807566	-0.247365727431736	0.789721897283519	0.211150800063136
QSF_AFP4.5.7	QSF_AFP4.5.7	AFP4_MYOOC	grey	0.0138832717382958	-0.0890775353960068	-0.0697691198865193	-0.135822293417899	0.073776055662652	-0.174149580679609	-0.344663793392263	0.0141755867266617	-0.0170399705395472	0.922182680160484	0.53001525828071	0.623085759318794	0.33701582667735	0.603214551034813	0.216925769523384	0.0123431669287329	0.92054942881124	0.904563476938644	0.0101887158915873	-0.160863409897924	0.0701193282691361	-0.169119315048573	-0.228832718966258	-0.0433599833740438	-0.167639137615397	0.0620651968015871	-0.0689897846475576	-0.309032442486473	-0.157846085420146	-0.230546753152552	-0.0908356854354824	-0.113088388644966	0.0533807297880787	0.197530686646118	0.265743089597281	0.283427144938815	0.229999231746463	0.0101910186681313	0.197064358241651	0.366170215930399	0.0905086382894606	0.360767128880626	0.39507078598306	-0.177447392533065	0.942850475125352	0.254602140637273
QSF_AFP4.6.7	QSF_AFP4.6.7	AFP4_GADMO	grey	-0.0405904703734581	0.255038510402474	0.111757762970296	0.330987057457542	0.104635570534315	-0.0127322267259441	-0.210057446550451	0.077267369844694	-0.02082011920923	0.775104464668771	0.0680452919181594	0.430239588070161	0.0165413893043133	0.460377245272232	0.928616943811492	0.13500428557351	0.586129496040758	0.883524982137468	-0.0854119764887875	-0.297667086689157	-0.450563230297068	-0.277776438704977	-0.306093511836507	-0.224818676663232	0.266366963866241	0.14010339388089	0.338605003245711	0.0604805487425906	0.162648992277583	0.339439803585785	-0.0940148869538551	-0.0854820849991299	0.259846110632848	0.241494262987915	0.0379951757603357	0.0554522465908542	0.0882982277123869	-0.332751276568126	0.19259616440629	0.252008424029598	0.20283826418487	-0.149681962077655	0.0822697441832294	-0.344850172361044	0.547144815228375	0.0320993057328252
QSF_AFP4.7.7	QSF_AFP4.7.7	AFP4_MYOOC	lightcyan	-0.01968972068239	0.177408158126852	0.273663931032835	0.341741970232588	0.0691774989739646	0.11980759189231	-0.0158758027679361	-0.0164037291357443	0.154706470502953	0.88980856238368	0.208312823769477	0.0496345056728973	0.0131535667960889	0.626042871894496	0.397554760419219	0.911056464182922	0.908111287383785	0.273475364064956	-0.0838304930747839	-0.0624828662079888	-0.348245164190312	0.0795261305528301	-0.156084657131041	-0.0806205781861193	0.574320593067142	0.279325051916353	0.2893413132002	0.23665719207935	0.105218415845849	0.48226420469875	-0.205227996967357	-0.217551308228852	0.0111655760553174	-0.0473228248063134	-0.219502634663401	-0.00165316461986759	0.122150831613392	-0.267906910612818	0.0874033025629437	-0.169257255410183	-0.280386857200842	-0.565323153331805	-0.187205715777991	-0.00242354330157703	0.554616376939895	0.659902448849582
QSF_AFTIN.1.1	QSF_AFTIN.1.1	AFTIN_MOUSE	grey	-0.178051089184174	0.226215921832072	0.0788729559579564	0.404347896500713	0.161140760278894	0.209537345239734	-0.0313633176086545	-0.0688131547943219	-0.0261753926831386	0.206642255726451	0.106832943492454	0.578346205325331	0.00294895087860957	0.253773176643306	0.135995501804112	0.825310059636086	0.62786689150784	0.853859291040311	-0.169679365933544	-0.0089507181749923	-0.179861125760841	0.21880954629044	0.189781962892668	0.0554261083840972	0.493754199669141	0.00798428610418956	0.126858709582695	0.0223325688181548	-0.127116865008075	0.31557689788675	-0.157269944007319	-0.0771721112784154	-0.025801251394053	-0.0965193079118182	-0.30905851205082	-0.157999082809794	-0.00254465818203864	-0.276974652419724	0.0459074972655724	-0.25066959334964	0.142330653693276	-0.50743697246633	-0.272737933791342	0.227234201712355	0.22914084008753	0.949785015339008
QSF_AGA1.1.1	QSF_AGA1.1.1	.	grey	0.00576568766723991	0.231911712088267	0.00664336939186389	0.157992199845312	0.183268378706743	0.370382071025765	-0.0364833422672691	-0.281617236273752	0.0717799572045959	0.967641427005937	0.0980612703786665	0.962718891385268	0.263291139096942	0.193433881143292	0.00687580618217124	0.79735229091026	0.0431203307450207	0.613079142986226	-0.140904067050959	0.0341550269105373	0.245186299939168	0.180643724885459	-0.0553887612201371	-0.229278105819503	0.107744246198769	0.0190559445483401	-0.185831670098508	-0.34140262145695	-0.336906928852295	-0.157344353648539	-0.0437203787115232	0.048542465451867	0.00862162595135139	-0.239774703507775	-0.0925063815782923	-0.0408398621703853	-0.204395132359871	0.0553256555487861	0.165232607990475	0.155145768077298	0.0926374636313067	0.125288850235692	0.460248520607943	0.215724489742613	0.319077213717988	0.81003700775031
QSF_AGAL.1.1	QSF_AGAL.1.1	AGAL_HUMAN	grey	-0.132274460816254	-0.0882431890673031	0.0854809028096545	0.208545994077661	0.0983365241440601	0.0405527759785666	0.0360261498428216	-0.13295459066057	0.116041188940867	0.34990485503024	0.533890901598205	0.546820281478044	0.137899906321612	0.48795774987689	0.775307868634185	0.799839105634861	0.347410788550323	0.412663005043663	0.0835020554567318	0.0259146343625217	0.0384317421733433	0.230814901410189	0.05712892469121	0.0542727215374803	0.255502093070533	-0.111119508046177	-0.196301727621702	0.0484997984564149	0.0240981083298855	0.329769725331019	-0.236048316448929	0.0836084675464289	-0.000156018268737894	0.0519868549672211	0.035795467868133	-0.0956325308491995	-0.0784016339447301	0.186315364700871	0.126074103707042	0.0984966094245839	-0.304623702551287	-0.339684335763458	-0.402972991279244	0.234428613770365	0.556174092122312	0.855299478558872
QSF_AGAP_AGAP011100.1.1	QSF_AGAP_AGAP011100.1.1	.	grey	-0.00308890256377689	0.0510535171138707	0.230156805859233	0.153601223462622	-0.309107281462459	-0.0510502548708395	-0.121007811759724	-0.127546426737989	-0.0322195718381691	0.982660970077844	0.719267990511746	0.100702239323647	0.27695901950002	0.025764938057219	0.719285192117748	0.392809126630904	0.367545792771469	0.820618513641249	-0.18745858376062	-0.160060276575267	-0.322838069012407	-0.37720518708377	-0.26718750646859	-0.29189582606639	-0.116330596531049	0.309248887125919	0.376559471801082	0.206218313721422	0.306324711375356	0.0889133347824852	-0.0937305092554493	-0.0297915104304855	0.291548618587908	0.17291875106609	0.189898413147906	-0.0715534175877939	-0.0942929645596961	0.0506799085989815	0.115523710081325	0.0144154330730155	0.196683190948889	0.0923226605561589	0.0356781991236708	-0.413422291215104	0.183269777027533	0.257012894194158
QSF_AGAP2.4.5	QSF_AGAP2.4.5	AGAP2_HUMAN	lightcyan	-0.184848690950902	0.167566593549347	0.0087746281819102	0.478955868834273	0.206036645100955	0.179345745824328	-0.381775700280421	0.0258839509086248	-0.0760075842855907	0.18955443027594	0.235076190250016	0.950771680180366	0.000328160767554213	0.142809408919568	0.203306933794088	0.00522638610840181	0.855468976379219	0.592269250971228	0.0536633992494445	0.000654210096302798	-0.196315466428241	0.222391673710117	-0.0189620059213529	-0.169452000582005	0.59514114196406	0.155091340850633	0.214170615926061	-0.0811750243231091	-0.158630802966197	0.396275713331338	-0.264337280968617	-0.0786565942872652	0.0837980556293667	-0.0762412015541145	-0.103720056645444	-0.2314462011001	-0.109698351845943	-0.196952686572034	0.0965110901965808	-0.00632456099427992	-0.107750319315593	-0.549729702703782	-0.229371930247791	0.186612922063016	0.705551079289652	0.99632743499871
QSF_AGAP2.5.5	QSF_AGAP2.5.5	AGAP2_MOUSE	turquoise	-0.154505364412638	0.305070093453274	-0.0299016641249094	0.0928972490411301	0.0832438498094	0.160777702182843	0.149677581700077	0.045205664235084	0.115602790959262	0.274107063582215	0.0278686047290131	0.833332588955433	0.512451073523384	0.557400161930685	0.254858678756596	0.289561972914499	0.750317230970007	0.414442731399401	-0.131460804772611	0.00752552584643539	-0.154231946766609	0.0871506093580094	-0.286860079629214	0.102330858182011	0.291360484707054	0.217011525080198	0.601705987213601	0.0951012468053533	0.0540318790502034	0.337235940911559	-0.00248300553281537	-0.385398278566303	0.022492183200436	-0.153616089253954	-0.313821036835361	-0.0297984810347782	0.017749173012921	-0.262283431545538	0.0605858779750171	0.0441322754790449	0.0861743240975404	-0.361539445365083	-0.140191680420217	0.0476041525071929	0.352903000013105	0.957772647378692
QSF_AGAP3.1.2	QSF_AGAP3.1.2	AGAP3_MOUSE	lightcyan	0.26555026655496	-0.223796702845903	0.232027145751867	-0.33596453531649	-0.0192142944356772	-0.232167169542506	0.114526491595803	0.305763264505277	-0.11879639095266	0.0570827285971054	0.110736068860709	0.0978894523412937	0.0148909343123569	0.892453357681537	0.0976813460858855	0.418830711565887	0.027497531130562	0.401578907783931	-0.196118166918674	-0.231095903080801	-0.20046801118472	-0.554212259582422	-0.168754526927824	-0.187998103367115	-0.495426471476366	0.233105423795145	0.119892920320691	0.0989575867564279	0.262524253598662	-0.274392710777602	0.214852266420246	-0.0411633365175761	0.173960676147482	0.293071517484412	0.452064616087667	0.384294010228245	0.149954399033235	-0.0220945349354572	0.117033938032388	0.113591419673985	0.188260976332766	0.499463791891047	0.230505099795841	-0.525329551735087	0.163491722243381	0.0992822339569387
QSF_AGAP3.2.2	QSF_AGAP3.2.2	AGAP3_HUMAN	grey	0.0411921673556493	-0.170245800120721	-0.0711500798531123	-0.131194632949554	-0.176167588680544	-0.249302102746898	-0.0979158059759571	0.223926657541055	-0.0172060737710694	0.771859662075695	0.227567311171842	0.616206229249196	0.35388719512059	0.211563054066565	0.0747002466723605	0.489830145275689	0.110523665762387	0.903637552974226	-0.150840103179599	-0.231529166929653	-0.334215903884006	-0.506875801403663	-0.319443888959947	-0.181675944739399	-0.218800812039073	0.403013519839583	0.119502912682123	0.149541037723632	0.317905699546819	-0.0407941409403348	0.0473432609130597	-0.0241606550176172	0.419257871315061	0.012736913461365	0.250990626670642	0.282700362149685	0.329836480991428	-0.0178765610739497	0.0186794646620101	0.235691516573822	0.00762052142711113	0.265208724238609	0.190296849555174	-0.519721185137217	0.285789480063884	0.0986323424527519
QSF_AGFG1.2.6	QSF_AGFG1.2.6	AGFG1_HUMAN	grey	-0.0853344191545879	0.0839332100302451	-0.234882693364089	0.165795350195194	-0.119129833048771	0.163057031968636	-0.188515266012767	-0.132825943337234	0.0249237508470735	0.547510097845899	0.554129635617824	0.0937128888619091	0.240132745693411	0.400249338981848	0.248095481900153	0.18076833044568	0.347881701083385	0.860776426617469	0.101135941791351	0.185059212678674	0.324749723286218	0.351130583411703	0.233409926648024	-0.00368745580142577	0.131490573193489	-0.109798992515375	-0.10811243206414	-0.0619414642687186	-0.415431078208663	-0.206734555495721	-0.248804464999152	0.0516635850122576	-0.0367184217577706	0.100202323768619	-0.233036250437353	-0.325514338668048	-0.189947242917995	-0.089238671246187	-0.0155147237117772	0.158703163482353	-0.038971740916535	-0.0603015011815842	0.149163620208921	0.358818836841821	0.47559494360687	0.189041855111186
QSF_AGFG1.4.6	QSF_AGFG1.4.6	AGFG1_HUMAN	grey	0.0220785220379194	0.274151958539266	0.165156677597981	0.174594932270538	-0.045531260791298	0.167841286394518	0.205477021202769	-0.173588915483327	0.15040217440157	0.876538225829693	0.0492129914926301	0.241974128382327	0.21573420302071	0.748577598228267	0.234298592259467	0.143921825711629	0.218432382821473	0.28720680150229	-0.160568565284215	0.0425166471575018	0.109006738221732	0.322301284424523	-0.0837967672065556	0.0649719205618462	0.311507753432503	0.107751930870094	0.167975956026198	-0.020161730034256	-0.210704537562804	0.0713914054981179	-0.123715090346605	-0.193045295256625	-0.0117671753030669	-0.294376467576831	-0.306481911118648	-0.0433280560885568	0.164948776355559	-0.0339555802819149	0.0805339534244243	-0.115882813779629	-0.0126270622071454	-0.238162200247632	0.0786297491729438	0.318376749225046	0.255485393293124	0.76473076046914
QSF_AGFG1.6.6	QSF_AGFG1.6.6	AGFG1_HUMAN	grey	-0.0197741951066123	0.0133242897573856	0.272869634029554	0.162383116576268	-0.0213710033815615	-0.0197755171159707	-0.0470141341529109	0.0181069034259546	-0.205315978312886	0.889338754871457	0.9253067603585	0.0503268216575927	0.250082306829686	0.88046531460427	0.889331402768494	0.740670544937217	0.898618222381008	0.144243136206573	-0.152786977563742	-0.553893424268305	-0.480395919333085	-0.272218151620354	-0.149031682608003	-0.21386906887221	0.150176570096795	0.234446920230035	0.128421589930059	0.158305601377368	0.295570581335477	0.339280027250105	0.0409003605478514	0.257017772259409	0.0834818162898549	-0.0617596660744479	0.0950333427350203	0.0247117929737654	0.0983804292886488	-0.0277223371655958	0.102260279182368	-0.287553668905972	0.0544688676538994	-0.203005301821896	-0.252996637451679	-0.256886742260856	0.279544136863487	2.04708377503898e-05
QSF_AGFG1B.1.1	QSF_AGFG1B.1.1	.	grey	0.0338169395636835	-0.053435055692103	0.224584765671914	0.32449751046725	0.137136799613326	-0.0472346139751216	-0.073498627838806	-0.0400912713560371	0.106659227979859	0.811883028028592	0.706747575072046	0.109452814942798	0.0189250471916744	0.332316471751116	0.739497133724877	0.604581433783969	0.777799416997435	0.451699654684215	-0.133713540263892	-0.346054896913748	-0.39669409607255	-0.111223692145668	0.0101598214521044	-0.0910269683200863	0.312897990605956	0.140111255037714	0.0928282171947996	-0.00435291025806929	0.0765652352000139	0.252279729824819	-0.191811274714867	-0.0931585796334106	0.0515058534378181	0.0343166814104975	0.0282947592268964	-0.150715122255829	-0.0461471890357712	-0.186392912097379	0.180971701979915	-0.0640401713100767	-0.274536054700281	-0.323075823719357	-0.230396021863526	-0.089248495998605	0.344640668115891	0.0119726451812199
QSF_AGK.1.1	QSF_AGK.1.1	AGK_DANRE	brown	-0.0765795892835753	-0.033758529558564	0.0904783879814797	-0.235020036499228	-0.0161936710450995	-0.250489975171497	0.0566846511203032	0.430236440211649	-0.217216501302686	0.589477951559446	0.812202060649383	0.523539451008602	0.0935155583233624	0.909283007485635	0.0732814680097922	0.689787464348226	0.0014551054148933	0.121904909867826	0.0348654426001357	-0.115281241793339	-0.485225287073136	-0.490469970238391	0.0594684638201941	-0.0686846389574182	-0.24800672024166	-0.12027606938908	0.132554949966886	0.403150354255837	0.735687818881874	0.371068945427905	0.0962545543416962	-0.176196167294806	0.0592753240555358	0.0212770792824055	0.22218693446737	0.129374690754839	-0.0313629285843968	-0.0999579718704988	-0.198581656202053	-0.00466502176237765	-0.00993588132313658	-0.00448983785651111	-0.42996670563123	-0.535956722029424	0.806161353292797	0.415750890098571
QSF_AGLA.1.1	QSF_AGLA.1.1	GDE_CANFA	lightcyan1	-0.192189721668598	0.446198654775156	0.101893395895347	0.342903347007864	-0.0447546782495997	0.393258566688607	0.0975416099763442	-0.248148073896095	0.0966046452330069	0.172261392398009	0.000914988907515425	0.472278745828616	0.0128261440338034	0.752728841352551	0.00392550080416575	0.491498639412211	0.0760993515508557	0.495689394589902	0.0763353167724389	0.308146568752402	0.314161274921765	0.611972589991124	0.0889766394224003	0.00808387935324064	0.526501931930545	0.108379593786788	0.00616639371381945	-0.192666725058116	-0.45239617843647	0.113024057518363	0.0230520178304977	-0.080972514246824	-0.103005099080018	-0.40009633333045	-0.507286160439603	-0.365844762037563	-0.290876318687023	-0.13380458651797	-0.210143498856915	-0.143368045929582	-0.260869309122724	-0.340328085789285	0.243657385801764	0.585721470766294	0.590669245521159	0.0262530621127351
QSF_AGM1.1.3	QSF_AGM1.1.3	AGM1_HUMAN	grey	-0.120489701800263	0.0568428382709091	0.291999089411848	0.0114587559704028	-0.0724377380222007	-0.0736721085932156	0.285479179064683	0.0308847392055204	0.0343297400571439	0.394853620277844	0.688965626203189	0.0356878952442381	0.935740818916863	0.609820801615695	0.603726538800771	0.04021977022837	0.827934911926516	0.809083441979245	0.0853765703277546	-0.0498731164877477	-0.323556578880038	-0.1362378169795	-0.119759616735378	0.0423943468988913	0.0703280496203326	0.201470045807768	0.356267920890462	0.475653015655896	0.44440893831061	0.395851261660318	-0.0879245549158613	-0.266260241496768	0.163423410866789	0.237050950513736	0.00369221163869618	0.0466301825480184	-0.00727446919165245	-0.0217322774431315	-0.0423464849129886	-0.0406530759241944	-0.148272457816329	-0.184513280138896	-0.280810719664805	-0.248735813853143	0.547311558065897	0.725501109506282
QSF_AGO2.1.4	QSF_AGO2.1.4	EBNA6_EBVG	grey	0.0763621734101502	0.0906288879181034	0.135150270509423	0.30665421506238	0.0976452578296641	0.0649762960661883	-0.104320127143636	0.0405772364133688	-0.0532913453751765	0.590538215690869	0.522846074790504	0.339434228699372	0.0270266578593448	0.491036190279022	0.647207603352916	0.461737985915399	0.775175875172812	0.70750096233678	-0.218953650580674	-0.421563647313098	-0.369521402359037	-0.0117587378004302	-0.265714670367614	-0.0559019230527163	0.491322086634254	0.25770088516171	0.211000920057259	0.186253957792088	0.0730456554300208	0.416782964557464	-0.154847866717882	-0.0886572582873146	-0.0529904561401593	-0.216119877089884	-0.0645047488525915	-0.0156077720138259	0.180620797258799	-0.0740770268558073	0.164719298452776	-0.15712456320554	-0.237637974397068	-0.499002070636231	-0.274748152575849	-0.0175893881718176	0.118876703723202	0.00185503564034374
QSF_AGO2.2.4	QSF_AGO2.2.4	AGO2_HUMAN	grey	0.0340142913409845	0.0636700131612928	0.126097971418292	0.0398104656947106	0.09771294440909	0.0982562647096248	0.104678169831038	0.226120238309406	-0.211683650235813	0.810805326462952	0.653846183508568	0.373055801733254	0.779316503261828	0.490734313165699	0.48831465317966	0.460193649850731	0.106985282252285	0.131939961731848	-0.131902184577499	0.153897311942782	-0.170629577599245	-0.000131341675364639	0.575993136613936	0.117062522982955	0.010845719691078	-0.170900957861426	0.0924838579915497	0.165814990728771	0.178871243923949	0.140960855937727	-0.0636567628611883	-0.209700799435106	-0.0228070480250606	0.146765567578898	-0.0599827261574669	0.113931570212211	0.0224033148773821	0.0502236503165188	-0.215682371258355	-0.11517161060402	0.0727000224760683	-0.14262113373916	-0.32307900886363	-0.0113673380454075	0.351274661608466	0.276022908913147
QSF_AGO3.1.2	QSF_AGO3.1.2	.	grey	0.0855070180937197	0.156086672249224	0.275056515292969	0.309905867530452	0.0619570777453605	0.0551857776380897	-0.0924490865949976	0.114396943062687	0.0543465629233323	0.546697344018138	0.269166026732245	0.048439419728961	0.025365001243545	0.662591723763852	0.697592138226351	0.514496509451845	0.419360650861858	0.70197559840679	-0.137929881778375	-0.129710299003813	-0.20151587774429	0.0547802925481178	-0.127899907817869	-0.13620521013053	0.323534989224665	0.0232526657515432	0.232832953587245	0.031827525652819	0.0935810578613248	0.349047552917941	-0.0536674168754186	0.00682310142416039	-0.0205031642910196	0.0186613731980712	-0.138501824072078	-0.00271896056059906	0.0109803321238078	-0.1909606486553	0.00883732769288449	0.0773461457695922	-0.0982691284920145	-0.364794367967699	-0.227442317726105	-0.00634799733981681	0.329501158953694	0.359406446307474
QSF_AGO3.2.2	QSF_AGO3.2.2	AGO3_HUMAN	grey	0.0590655813361951	0.0747203939736001	0.23110665350928	0.0409874848433332	0.12520546206028	0.0998462511130593	0.271371933598682	0.194063376530564	-0.103664219294106	0.677455698862903	0.598571948316254	0.0992660684392263	0.772963032997059	0.376475519956868	0.481269690746425	0.0516535693236502	0.16803711666937	0.464574360094491	-0.135793636726216	0.146089873598128	-0.104959411220572	0.0633397927446132	0.427303454420464	0.205918851064215	0.0799936237269059	-0.199220365274085	-0.0140697094344544	-0.0530086167736716	0.189520172213056	0.24263543589355	0.0434809335029407	0.00328081639669192	-0.196624775112774	-0.171553544068112	-0.153218447840132	-0.0799820634552455	0.0270360095246875	0.00791251197046557	-0.306946259359545	-0.291169514576284	-0.0717943090621709	-0.224236852005892	-0.308929509198827	0.0954508411465393	0.337118733423436	0.301408562975789
QSF_AGO4.2.2	QSF_AGO4.2.2	AGO4_HUMAN	grey	-0.155675166521755	0.132817724128234	-0.0256776319252568	0.0537110454071273	0.12080268702008	0.28720188123828	0.0479873912726054	0.0224107003692446	-0.0941428628878678	0.270446094992179	0.34791180080332	0.856608866270773	0.705301507412957	0.393617816349495	0.0389786886039173	0.735495236794119	0.874695477211692	0.506787699891249	-0.0720337233016355	0.214419835049016	0.232619502046418	0.381052539646105	0.344755078477328	0.116568703851401	0.243781719347121	-0.0403886459164697	-0.293646365623072	-0.113055902318921	-0.386322949141708	-0.127077914747289	-0.0857844358191896	0.0474373876926148	-0.307161439026131	-0.231487015573771	-0.292508788797225	-0.116002111868245	-0.053484271565553	0.18199862910174	0.117480819127119	-0.0960250305499748	-0.0797540160028315	-0.211883600604016	0.0132220541574738	0.463560067611879	0.611821220057049	0.126902411972085
QSF_AGPAT5.1.1	QSF_AGPAT5.1.1	PLCE_HUMAN	grey	0.245438552034211	-0.166823460508707	-0.296825510201385	0.0335570816077897	-0.0028938657962361	0.0933160796069072	-0.0272763966328316	0.135143367572401	-0.0216759482568768	0.0794657616148988	0.237188716854262	0.0326123603852818	0.81330259122572	0.983755624216678	0.510543232979485	0.847783623331359	0.339459126088859	0.878772360100962	-0.0202719380998897	0.242246592668243	0.151213301100955	0.225301289908815	0.139506924057757	0.188311756789313	0.168968583399043	0.0838671914093197	-0.0501803969681978	0.143086695788089	-0.228503551172123	-0.0965011236087603	-0.02805605104403	-0.271422955913568	0.131399877648354	0.172244649967342	0.115451755400314	-0.107243420198846	-0.0874336012945944	-0.247921748829217	-0.150734787933619	-0.0327459821645694	-0.0644873791165712	-0.100016842348368	-0.0173365021354469	0.208298555313308	0.886571309910762	0.0835809753243928
QSF_AGPD1.1.1	QSF_AGPD1.1.1	HYKK_DANRE	grey	-0.033413107669184	-0.084128016608213	-0.0431196090538729	-0.245370939946788	-0.074901580657522	0.117774783475697	0.135055357658257	-0.214656306828358	0.0700672092868763	0.814089354658782	0.553207069554909	0.761491721256803	0.0795512423301971	0.597682989736578	0.405668438755401	0.339776658206323	0.126473958506509	0.621598038046393	0.179891617126549	0.158003272138451	0.421843712831806	0.206091679621788	0.0969677585894522	0.196756376949179	-0.266216030235872	-0.377943215919261	-0.302581983989969	-0.510289393295926	-0.0765773290403137	-0.109688721975823	0.0323028094419224	0.0784641269381961	-0.0610474888869486	-0.232308766249969	-0.107387477897352	-0.0408573295721572	-0.167560821692464	0.201916096485746	-0.180357934029185	0.0968352173839624	-0.0471099779217955	0.238736793457846	0.0665458019219798	0.217005519773865	0.20191210200276	0.263257255104176
QSF_AGRIN.1.3	QSF_AGRIN.1.3	AGRIN_DIPOM	grey	-0.25569303980515	0.311419992217176	0.0107321656923325	0.173669708468647	-0.0417392378230208	0.138782784872559	0.00212792674876861	-0.341972234338151	0.196686988558851	0.0673170051125719	0.0246210103722692	0.939807682524484	0.21821482843927	0.768912799570725	0.326490263756096	0.988054765557024	0.013088085769146	0.162249466267437	0.105326783687063	0.16492404677959	0.378047016985198	0.432372718191838	0.0365613017089052	-0.0772877366849169	0.18500483647361	0.0620480339195534	-0.28554611421675	-0.144913289216888	-0.464585564960394	-0.26388325344684	0.0186087084173009	0.0651249741507424	-0.274230403935656	-0.261677799078574	-0.350338922207199	-0.262121366090419	-0.122189807978486	0.0102240605966047	0.0510823672805976	-0.0905404578783418	-0.369129119692143	-0.0178619463485174	0.375236257399524	0.46358594752179	0.457403151203343	0.242647222638497
QSF_AGRIN.2.3	QSF_AGRIN.2.3	AGRIN_CHICK	grey	-0.0210842074579302	0.44091190290289	0.244531769662102	0.40043039480218	-0.121383313144492	0.528029171267553	0.251376673803962	-0.249801380949543	0.0421601092702955	0.882057995718563	0.00106961528303274	0.0806182330636384	0.00326610971132932	0.39133127132722	5.7453079352223e-05	0.0722364046328307	0.074101288117547	0.766647922449612	-0.332738621526597	0.0118941822656965	0.0920064307511198	0.391537186752132	-0.171372953062209	-0.212185220576533	0.517178112499831	0.288005593279327	-0.0238598478851136	-0.0346862898354199	-0.315717039458862	0.155783899501006	-0.0131766800860979	0.0690104894367229	-0.0827696552150438	-0.220539158352159	-0.442745059348379	0.000115547029632609	0.085595318597974	-0.25082054648409	0.202145917235827	-0.127324789235573	0.00123603272696422	-0.327500512525891	0.296012138988339	0.391418491573978	0.0159436705134868	0.933304427574887
QSF_AGRIN.3.3	QSF_AGRIN.3.3	AGRIN_CHICK	grey	0.00312300529628125	0.318774495235671	0.0691604353759679	0.384839260238386	-0.118611313823246	0.518901589735144	0.228513920713684	-0.206377417715929	0.0838144319523177	0.982469569888902	0.0212628449510748	0.626128248151556	0.00484685794128949	0.402317993158792	8.10843769758707e-05	0.1032241176227	0.142135165037296	0.554692503555992	-0.359728293268453	0.0286501052175941	0.105610717234287	0.401938044316297	-0.12025351517221	-0.28744011864937	0.502551706808307	0.36308969739508	-0.0445154136166957	-0.0574649038719457	-0.361493060730762	0.085849905456578	0.10999511744685	0.0833474212405381	-0.164992550896486	-0.281802730520698	-0.362674179314428	-0.0816971077923783	-0.0804494719581086	-0.153878917642395	0.102314982925855	-0.197016138813145	-0.123646213740983	-0.352124369676312	0.2474105272188	0.42967806345392	0.00881096319308846	0.840215410619483
QSF_AGTR2.3.3	QSF_AGTR2.3.3	AGTR2_MERUN	sienna3	-0.00955196192030808	-0.0846231838424888	-0.119507408079345	-0.07123980376391	0.110318073885392	-0.056998277017669	-0.161816941811744	0.0787433048127679	0.0728943491800273	0.94641670673756	0.550865345310797	0.398746896060729	0.615760371859912	0.436240434316493	0.68815841354761	0.251759800191845	0.578972954040985	0.607563358526326	-0.219665214465426	-0.128272691306753	-0.183376481799817	-0.277323488426733	-0.2867175846883	-0.323521574072675	-0.0219428199875108	0.503534778503832	0.181454746116987	0.0927758043024448	0.0144661713885644	-0.0946286849854547	0.0853895818228987	0.0164077834913308	0.000970054531556838	-0.283239339156312	0.16834245165271	0.166425674744874	0.141307805117042	-0.073626839635634	0.0158233158961096	-0.0636353274599721	0.0857369070767162	0.0849911987016343	0.205129795413159	-0.237002375996448	0.117652941563257	0.364801643269723
QSF_AGXT2.1.1	QSF_AGXT2.1.1	AGT2_MOUSE	grey	0.225949656452402	-0.103405718028233	-0.0223780073416608	0.0119037013200572	0.0720801956458119	0.171979564346424	0.0131150018778266	-0.0721032589434482	-0.0344501631686701	0.107257281330385	0.465694786296413	0.874876811662993	0.933251171189066	0.611590975898507	0.222797456911371	0.926476734037904	0.611476724128989	0.808426345353907	0.106747070331216	0.156182247241819	0.480584593493939	0.458190924899914	0.181099126227026	0.323846069295531	0.0830546875053781	-0.117554097008568	-0.327758577995779	-0.453240774185279	-0.387101323157543	-0.126794831224652	-0.0109993040096272	0.187406010100214	-0.00684800957437544	-0.138254846411394	-0.221896304085405	-0.0787593063482036	0.0572466312578851	0.173454411481965	-0.103306153630944	0.14553386722996	-0.0695254964555478	0.102315223470187	0.25343210816219	0.46298385001662	0.451325023043569	0.268869300204126
QSF_AHCTF1.3.3	QSF_AHCTF1.3.3	ELYS_HUMAN	grey	0.0324561079558851	-0.248554122422761	0.0388281327102651	0.171545908846986	0.248919879919238	0.0580256635864483	-0.108200385965604	0.0570228777227013	-0.0430541710865091	0.819323585481822	0.075604728237503	0.78463005698083	0.223983950604877	0.0751613659566137	0.682831764531469	0.445151694217546	0.688030690580262	0.761843051334672	-0.112783636146402	-0.255860131833841	-0.444137347086958	-0.188020379203628	-0.0354719512811855	-0.132848907709953	0.222862568365822	0.10075090916377	-0.0503091927833768	0.118243675549066	0.319346735339299	0.427113157969818	-0.137588593098801	0.137953197132829	0.153353251612705	-0.124902822799184	0.111380667747955	0.0108175261998764	0.016096026864667	-0.0258093761347981	0.113588139377613	-0.234712959564326	-0.016155406760161	-0.35488878482036	-0.490102419555008	-0.160628479316344	0.425992099114496	0.0671320839646555
QSF_AHI1.2.2	QSF_AHI1.2.2	AHI1_RAT	grey	-0.401650103783252	0.31271147733719	-0.0821482301907843	0.301376909162437	-0.334326805899687	0.202386705756354	-0.080755152770457	-0.244505834738144	0.111604786200276	0.00316427870757134	0.0240009837228044	0.562616772531997	0.02991693491958	0.0154177178670784	0.150180995990364	0.569282489015331	0.0806513875005894	0.430875003549093	-0.0488096029094462	0.00965772600782874	-0.120729196685102	0.113613140627204	-0.204931925942792	-0.0827483914454658	0.414235873004694	0.299173222602498	0.386089923707593	-0.392822391874598	-0.254328383217472	0.17774380799493	-0.219277942264397	-0.0938660941770417	0.210892594238	-0.123665224362113	-0.280852365801865	-0.100090009183328	0.0482482382371677	-0.130048164882661	0.198927029257852	-0.00777496237204985	0.0265873138062577	-0.329487647277706	0.0860984995276273	0.12509133201783	0.731132158108686	0.945824285868034
QSF_AHNAK.5.6	QSF_AHNAK.5.6	AHNK_HUMAN	grey	-0.21110061407845	0.0842588670022896	0.180992511869258	0.211448732423347	-0.172229151443332	0.023702305809762	-0.29957054591638	-0.0103225031219661	-0.0803867782587337	0.133032533776016	0.552587797667631	0.199119659675712	0.132379368737265	0.222116560663424	0.867536684505259	0.0309635925515967	0.942101319485168	0.571051210383865	-0.188174864890917	-0.408701108648298	-0.421550247080479	-0.208490675154516	-0.258148282330564	-0.324725077983212	0.251460810990212	0.520038369580317	0.212653965966543	0.099299309828544	0.143418017392594	0.251138432854659	-0.113994681735032	0.0780834105184606	-0.050272271454178	-0.0404938621471441	0.0919348263858176	0.149925854469736	0.0121782566892264	0.219403230941978	0.261290834267631	-0.0650706860131011	-0.279882114615477	-0.294539510458995	-0.190553859265048	-0.205638560686024	0.181571451112922	0.00262874765623656
QSF_AHNAK.6.6	QSF_AHNAK.6.6	AHNK_HUMAN	grey	-0.0930851878535093	0.0873207522564007	-0.0181479405254927	0.214284115530168	-0.0376297799942072	-0.017382221131649	-0.0908600837801288	0.0270087019817544	-0.221719123067027	0.511594536491451	0.538191828603918	0.898389659988421	0.127148810792303	0.791125268058421	0.90265577796404	0.521781811616236	0.849260049308825	0.114174338762564	-0.283012758580238	-0.367461403553223	-0.385373655832558	-0.146538765234951	-0.117063571517339	-0.224510717149674	0.29430339938087	0.555053936506291	0.316959983036996	0.236551709656503	-0.0610183492224714	0.0847030598887616	-0.00350927026766713	-0.113660515674507	0.066497763611193	0.116714988413924	0.0173147789448093	0.200491543152628	0.173362425727979	-0.116543068375081	0.146481716842792	0.00229522346437424	-0.00552309782876142	-0.218438114623269	0.0350140948222713	-0.140478147369358	0.0420530412775073	0.00736544248680246
QSF_AHNK.7.22	QSF_AHNK.7.22	AHNK_HUMAN	grey	0.0780803346025105	-0.0216227233395026	0.0116213074687555	0.0454448437810952	0.253684480078909	0.120212555931741	0.386754187289345	-0.114711696781338	0.25781995587543	0.582182653164414	0.879067808987595	0.93483120617876	0.749039195888177	0.0695718411891916	0.395949811352603	0.00462210150229746	0.418073763658259	0.0649932637506992	-0.0712098030008891	0.308521904120523	0.406689996518016	0.363269810226932	0.242747803845388	0.199641562009639	0.0159376039800771	-0.15089930518144	-0.110450031498412	-0.173997156062237	-0.259919361097429	-0.18091343127966	0.0215710417653611	-0.0209890414854939	-0.204363006319296	-0.0136447572060078	-0.352465362535225	-0.0136457075566694	0.167172397302929	-0.114659352761534	-0.0860320135448312	-0.0394754236382855	-0.0382603289458444	-0.011435438200675	0.148271073409611	0.381044103652315	0.6159094368052	0.0260614453960333
QSF_AHR.1.3	QSF_AHR.1.3	AHR_RAT	grey	0.107458249017508	0.275716732826931	0.144437427675355	0.49381432565182	-0.0904786760078897	0.471335749952217	0.0842121264466034	-0.314303394534384	0.0755070503751936	0.448298259991646	0.0478810796100567	0.306968688340356	0.000199037903590741	0.523538123590189	0.000420415883059786	0.552808967482036	0.0232548357485547	0.594716594838518	-0.251173458345076	0.384660591916043	0.365455511238492	0.658210895116444	0.130454081068019	0.14486129893941	0.464785558255545	0.178317968373105	0.154624679226725	-0.0770488239951672	-0.524660936056974	-0.0627783875740995	-0.0352874882997857	-0.0826753801146126	-0.0111641349567102	-0.00212820628682008	-0.463588474600459	-0.250481832209393	-0.189697407263783	-0.163426824249711	-0.0152309318102808	-0.280029369723802	0.0260637184948237	-0.311697242493495	0.222818047351128	0.62640033392669	0.0724748630407327	0.00486830926652834
QSF_AHR.2.3	QSF_AHR.2.3	AHR_HUMAN	lightcyan1	-0.021581958322934	-0.194214954894622	-0.14787231777083	-0.0685695196120153	0.165396752979047	0.142281751710641	0.14602437471193	-0.0688390864455717	-0.046607837202598	0.879294104625188	0.167698700760415	0.295484390422211	0.629087836390892	0.241280830776268	0.314320435809622	0.301627707028108	0.627736996590393	0.742834420938092	0.195745284595414	0.5778012812247	0.584313742899715	0.651055758111992	0.651401626845509	0.492598526183577	0.0426923503516143	-0.481971890246965	-0.350210811942354	-0.157323592747321	-0.353218202664257	-0.145034490486755	-0.225356164015733	0.000574238194725718	-0.24864063981082	-0.045475957017179	-0.333026922894438	-0.300415889564279	-0.177472247580642	0.125549758969347	-0.360713453687072	-0.145066123115886	-0.107940491042274	-0.138268743725051	-0.203670462109811	0.66884291620526	0.164309827468112	7.28421275960476e-06
QSF_AHR.3.3	QSF_AHR.3.3	AHR_DELLE	grey	0.134435036334506	0.08842692937377	0.0301179875879391	0.0163145598834044	-0.0849012782185165	0.171655225540967	0.204488649108542	-0.0474103690772635	-0.108643690520936	0.342019958027099	0.53303621456611	0.83214417925653	0.908608656761495	0.549552269978031	0.223684444957149	0.145902221041502	0.73856217191646	0.443277980224406	-0.196122165825019	0.182810167589562	0.242154828656971	0.308827628282707	0.0939641188027328	0.160654566963035	0.0918677534544092	0.0772802747266285	-0.0432831228785748	-0.0763824866903485	-0.239857626458257	-0.099846339935279	0.152033747851922	-0.109535642036025	-0.0222198949728814	-0.170703382428961	-0.119904303387706	0.0178845248511181	0.00363555298931035	-0.0074447343236801	-0.270692467611631	-0.0705787183984146	-0.0276640966489483	-0.0166913074258959	0.114337759637572	0.314959499217621	0.163482964792993	0.194569225663095
QSF_AHR1A.1.3	QSF_AHR1A.1.3	AHR_DELLE	lightcyan1	0.0763709217856951	0.192588716828249	-0.0674162998330071	0.323834028079357	-0.0817124574014729	0.332616986147127	-0.0819668744694313	-0.277219529852095	0.0716358359874019	0.590495536374672	0.171355440713723	0.634880348679306	0.0191843851070725	0.564697964594084	0.0159845750386278	0.563482466725163	0.0466297163009182	0.613794046986215	-0.149280378867324	0.275169953133285	0.393009563916417	0.535833148271848	0.0482894708295669	0.0834462123286511	0.251393338088478	-0.0133545540325466	0.062673762519842	-0.113660822463561	-0.475128402164236	-0.136993959623519	0.0483669847423853	0.0312045436388815	-0.0646739589999807	0.0889815765853435	-0.390867260534116	-0.239501852279127	-0.276628928203308	-0.159772187530945	-0.10388184114358	-0.0987131192158284	0.174454408285692	-0.141730787908008	0.207651796439661	0.504516671169382	0.290858352328804	0.0483431109449624
QSF_AHR2D.3.6	QSF_AHR2D.3.6	.	grey	-0.0940465175970206	0.183153476200221	0.128130795324895	-0.0295228656352198	-0.120376826200378	0.20630185934029	0.360273004750716	-0.0644161945732853	0.0660021642979174	0.507224607287052	0.193718139620119	0.36533681126599	0.835414470964273	0.395299860563893	0.142284457982355	0.00870165075554548	0.650050766967486	0.642013081438707	0.0789412843760669	0.318571402572414	0.283742680928721	0.295384783875587	0.212417422687515	0.0847893449379677	0.0507547835292469	-0.103177334982358	-0.037338610994466	-0.271091316008332	-0.13755297747144	0.0349021236476365	0.0544163286582478	-0.0253839273586424	-0.000326720135303646	-0.0555715176942472	-0.293221118113035	0.0492453962484897	0.100671825582321	-0.0708852609839918	-0.209359606578612	0.0584689630384637	-0.0276237945568933	0.0202598307319495	0.216648468241126	0.272042053249173	0.578016022313914	0.0213500966007115
QSF_AHR2D.5.6	QSF_AHR2D.5.6	.	brown	0.0311491330815199	-0.0985237683528706	0.0367017912893876	-0.191791792911037	0.0945256191736171	-0.421126363432026	-0.107306100609474	0.336269412596113	-0.0355509775584514	0.82648456223363	0.487125629962393	0.796164779487451	0.173168377946466	0.505053870055137	0.00187757181184222	0.448944859172476	0.0147945859479029	0.802425805311733	0.0922393123309919	-0.418336560397089	-0.462385274545107	-0.394482060648396	-0.202328464242282	0.0545549527348312	-0.0730084603756999	-0.261623595106833	0.00368967241324014	0.336331239493938	0.530703937769406	0.389260759177653	0.0326514196139978	-0.00974470081813717	-0.0794322170546189	-0.0908815432687741	0.240878681832614	-0.00171181688532412	0.0260872699552534	0.100015530928749	0.0551482461839935	0.112095300340031	0.00882936006530297	-0.125326816042433	-0.494488068346072	-0.416378040513789	0.515455341587834	0.0020271765412433
QSF_AHR2G.10.10	QSF_AHR2G.10.10	.	grey	0.157387659327866	0.10698449121602	-0.073285073443611	-0.0203838403098773	-0.170500229412103	0.312820727915099	0.181229874121987	-0.0985188377522733	-0.0135324549867511	0.26514561489647	0.450313319665401	0.605634529970317	0.885949318415185	0.226862954006992	0.0239491414817199	0.198521189236459	0.487147532195635	0.924143217945618	-0.302575447164794	0.102832923670482	0.318858634933012	0.075936720190268	0.0810752343283983	-0.258253365884749	-0.222467999256594	0.0770770848465482	-0.222049898965826	-0.286339761831321	-0.382401003189141	-0.525944622929777	0.411614144292188	0.194214822529004	-0.183800021535618	0.0160677825823695	0.0404673287296274	0.1914841527993	-0.13673513950701	0.155434315230337	0.0583482053540262	-0.00241362662092473	0.279176984755037	0.385417829268875	0.567831037516236	0.146790554320957	0.0292388731054564	0.468182636073163
QSF_AHR2G.4.10	QSF_AHR2G.4.10	.	grey	0.241188779673714	0.0154911935541912	0.0901165001958671	0.295154678056916	-0.15032654100827	0.16244670802656	-0.168768938928675	0.0588553385216542	-0.146932971877865	0.0849810641640462	0.913202856937173	0.525208593463367	0.0336511473408478	0.287452047926712	0.249894368617435	0.231685668431434	0.678541318411248	0.298596931981958	-0.361898234440048	-0.111401461792583	-0.26501351376432	-0.0868108582051909	-0.491223798659838	-0.375530955135705	0.312341890924911	0.54785373085877	0.223036774086964	0.128731070272468	-0.054484062640352	0.0971011650937207	0.103728769524651	0.151574469758896	0.0674613821908624	0.0579835351090607	0.0886691212264491	0.104782989662315	0.0171694289911366	-0.168504428305337	0.448321926646573	-0.119986217115345	0.0682683328677275	-0.193922333281233	0.161672013775993	-0.113478164876305	0.00838245386765678	0.431720363100459
QSF_AHR2G.5.10	QSF_AHR2G.5.10	AHR_DELLE	grey	0.0028976098841139	0.0922986380208824	-0.0653102431513954	0.161445460176342	-0.145754831971635	0.089259134386958	-0.0643852185109947	-0.176603628595444	0.120573829212634	0.983734610040518	0.515184085691577	0.645514804360247	0.252864570842158	0.302530616634679	0.529173548833887	0.650208151079534	0.210416625043324	0.394521224731313	-0.244703255608132	0.00379997053110938	0.0015375901017596	-0.137585400751459	-0.268489308277455	-0.35651497346593	-0.0403674593390214	0.367950204527553	0.144248624351654	-0.0495493913668067	-0.24082261766561	-0.344114573483645	-0.133679101149007	-0.20606805984248	0.142167075081568	0.0792130136974863	0.190641569589857	-0.0161540118881973	-0.065719493679545	0.0334201311381073	0.350421692218113	0.217161242569267	0.0513610506705949	0.202756295127055	0.417081109706035	-0.113104029704588	0.0803992805221267	0.978670346628461
QSF_AHR2G.7.10	QSF_AHR2G.7.10	AHR_DELLE	grey	-0.0464779028443265	0.0324062003125331	-0.227126135297456	-0.0841463271024032	0.0794058692143427	0.156865238615359	0.0123189119346422	-0.0185534765734729	-0.030503399529988	0.743526848560904	0.819596767592399	0.105392104492106	0.553120392162618	0.575773295051116	0.266755193102526	0.930928471681525	0.896131407402064	0.830027776550865	-0.298309270842825	0.32107701646888	0.257824830365749	0.193856114361946	-0.11824241579711	-0.139054341262221	-0.0105364334629848	0.205441594756742	0.105325235001916	0.0955290558721672	-0.318312863889744	-0.267034646380184	0.0568578069659386	-0.18489501766328	-0.251745026784998	0.0238068298970063	0.0248859963158661	0.244006492704216	0.162416190647452	-0.154045995554551	0.136512071522371	-0.0658630561726997	0.227539650431769	0.00627855473993731	0.129083855353692	0.22416127885606	0.0317123345807844	0.0202945245152151
QSF_AHR2G.9.10	QSF_AHR2G.9.10	.	grey	-0.178934514968542	-0.0817788477589642	-0.341052994559955	-0.294872298851647	0.284987418927523	-0.183189135043104	-0.104681342131343	-0.108778279396684	0.0802789690881335	0.204362210077064	0.564380661446542	0.0133511731711185	0.0338293889508102	0.0405799493217159	0.193629891040326	0.460179979387767	0.442709979877668	0.57156932702122	0.343746955146111	0.0166253348104714	0.430010980710454	0.121646718025493	-0.151726053373476	0.089170689457374	-0.205332033742607	-0.290346322522497	-0.396011638330414	-0.323904555098894	-0.312245200629485	-0.295527124461554	0.0014970380331259	0.145166959198787	-0.212664458837314	-0.166021646492801	0.0529109201476309	-0.0487094603301118	-0.0459365741320386	0.0776608343604957	0.128372258792128	0.285898564503338	0.0652807399860283	0.320712127085123	0.340989553175149	0.171041551794344	0.0125927150398497	0.906875364132551
QSF_AHSG.1.1	QSF_AHSG.1.1	FETUA_SHEEP	lightcyan	0.245311155194555	-0.26944861567002	-0.147095738832928	-0.495739297005509	0.137281908821179	-0.235600375497469	-0.0107054078182805	0.143474610701522	-0.0778536039771425	0.0796268874528475	0.0533988243312248	0.298056085774262	0.000186239130106125	0.331800234742318	0.0926853104367671	0.939957481119679	0.310238533510777	0.583282191258489	0.155639360895973	0.100937812649308	0.535292531851743	-0.0982591103287133	0.117042685876891	0.132040920092221	-0.744901284983335	-0.355819896878484	-0.46526518883154	-0.378265176625224	-0.206108878037625	-0.705883068665079	0.226051453049443	0.179528148660521	-0.0520395068491277	0.100561448698237	0.357967052140913	0.174749991120097	0.0980544282524621	0.184316117888253	-0.135149050387034	0.296858652574697	0.179726849163251	0.876224600959537	0.502017943130941	-0.036630247740761	0.270557666371584	0.47646440814847
QSF_AIDA.1.1	QSF_AIDA.1.1	AIDA_DANRE	grey	-0.175141943031912	0.0844728610177422	-0.063448241344343	-0.0908955179092017	-0.0576563057807852	0.299915369920061	0.353569318208586	-0.107314007264718	0.138739954858191	0.214276905570483	0.551575745627154	0.654975896326084	0.521618793339763	0.684745012465064	0.030761471931992	0.0101321085748872	0.448911244892005	0.326641046422921	0.129037513609845	0.628553040799883	0.292770983535894	0.356872217011158	0.202257889474599	0.194120850648674	0.0318697873270512	-0.225473322163333	-0.0712578115625464	-0.0305980791023813	-0.0285493083106943	0.0871607369971507	0.157149940029616	0.0899136627202229	-0.199441484243337	0.0658965417944621	-0.2590016766293	-0.348970124152006	-0.374736155558505	-0.117648988266444	-0.239329814668185	-0.288832821693301	-0.113422538380533	-0.170611500636536	-0.146715795612159	0.333043338778025	0.361925262587498	6.05925773188108e-07
QSF_AIDB.1.2	QSF_AIDB.1.2	AIDB_ECOLI	grey	0.112297412085364	-0.12525582397058	-0.295748569112974	-0.17389967400669	0.102947035885104	0.211511744225227	0.0221921428775589	-0.266835802278086	0.192478952869461	0.428002279251654	0.376282056644629	0.0332788155700606	0.217596418011275	0.467686437594202	0.13226139926681	0.875907844348059	0.0558459163991303	0.171604323317727	0.0722944697529178	0.253877286331887	0.730733135417203	0.370202488537503	0.1104035539105	0.0932607002531123	-0.240046201686114	-0.184005714885293	-0.441979878636469	-0.585788081658667	-0.614976250539478	-0.585480676106349	0.0570952749883361	0.101545616464472	-0.135812684306377	-0.0433372346185671	0.0336307666671961	-0.00369471414470617	-0.0449609625078011	0.206185208092114	0.0115801556272414	0.188023960202653	-0.00343233852790994	0.454976343773434	0.571340109465441	0.449027162641558	0.61052985059959	0.0693528194257313
QSF_AIDB.2.2	QSF_AIDB.2.2	AIDB_ECOLI	grey	0.00920427783748817	-0.357840814167534	0.00106069581778175	-0.116851711193639	0.109513724518562	-0.180868120055843	-0.248662725407179	0.142359469493753	-0.0656040049527645	0.948364405104743	0.00919899409875968	0.994045563289581	0.409384189204909	0.439613346209907	0.199433803485105	0.0754728668936748	0.314053451452226	0.644027177507207	0.478109487223614	0.19785026693518	0.164890009641213	0.0709112473169661	0.197812344445937	0.186291671710425	-0.102439359529832	-0.0406245647842634	-0.171124837965259	-0.181560888257487	-0.0728437224426764	-0.121709019136932	-0.169787796969601	-0.00832985488616379	0.273309169499134	-0.0176101293067533	0.207391589423892	-0.236117115008846	-0.150176698776247	-0.0456683683834466	-0.26384443828438	-0.0445253673688744	-0.274525894732643	0.156089922084257	-0.0159253206848189	0.0865652833152754	0.000337412494265	0.15973049864874
QSF_AIF1.1.2	QSF_AIF1.1.2	AIF1_RAT	turquoise	0.120876066887301	0.203831251761891	0.537775650971235	0.194538280372325	-0.268526333700762	-0.0311682332911517	0.0201620647291187	0.159996042336535	-0.161513069199392	0.393328409202622	0.147230598020021	3.93306252309199e-05	0.166978498854656	0.054252496664282	0.826379808966314	0.887182090339408	0.257206366374538	0.252663261088951	-0.123795976606369	-0.17117501439869	-0.415223459207293	-0.21188202950932	-0.234995795400807	-0.222012681733194	0.194159644317752	0.408733688269523	0.701380922920654	0.261709007325426	0.246161935955339	0.281189353733243	0.0233637639895815	-0.111609728410028	0.172549671379957	0.154604193761419	0.0945417890684737	0.168261108644047	0.029535499065128	-0.0145108687575268	0.124777052882571	-0.219220398818769	0.0628854236123818	-0.24242370325005	-0.118789181416398	-0.272525374234683	0.381914113454741	0.225002197780957
QSF_AIF1L.2.3	QSF_AIF1L.2.3	AIF1L_MOUSE	grey	0.00968664612494919	-0.218319092628106	-0.308318008784321	-0.025915623502491	0.03914062709168	0.109917532754092	0.0528918558487202	-0.161603768445327	-0.0181575022065946	0.945662299433345	0.11997616861647	0.0261653923751924	0.855294014579302	0.782938669812517	0.437918229156987	0.709596704445373	0.252393368985218	0.898336405918729	0.232884005728147	0.252040165319048	0.372651453790787	0.379353539982717	0.179414359615078	0.223386632337723	0.028217754845064	-0.144245632075327	-0.254319355291294	-0.151497208384819	-0.270768368597719	-0.149499894015928	-0.154278247112275	0.0217685779894317	-0.0177155263764858	-0.0806767083992235	-0.111376017631347	-0.168469386818205	0.041904752988718	-0.0443161097324152	-0.107680409343564	-0.081880143327481	0.0783976525013266	0.0129616508395287	-0.0318177621119516	0.367287330093745	0.0966213340315156	0.0714621804291053
QSF_AIFM3.1.1	QSF_AIFM3.1.1	AIFM3_HUMAN	floralwhite	0.163275435815417	-0.233263357497453	0.0143753526045984	0.145312454848265	-0.123167437228792	-0.154095108159927	-0.229495334108841	0.105603977241095	-0.117679508984358	0.247453891884318	0.0960639941174154	0.9194334635222	0.304016258008001	0.384354360977303	0.275398725378268	0.101711831274681	0.456213411333977	0.406051051600681	0.089808776784325	-0.113969839176705	-0.27239600567814	-0.206787867091496	-0.161372936851035	-0.0144039530682031	0.0636335745413273	0.206169713642007	0.255119646395515	-0.0306641504027506	0.186050100655314	0.176298893110738	-0.15885259955466	0.0783761011739725	0.912299095147731	0.113117693015024	0.277160103783266	-0.0128217115890865	0.0418437072341222	-0.133548294544973	0.0492648772128494	0.167149553132975	0.0630860867080376	-0.0121049571490526	-0.103933877605495	-0.238992722739666	0.526629986692581	0.42111049423285
QSF_AIM1.1.2	QSF_AIM1.1.2	AIM1_HUMAN	grey	0.0222845325861271	0.151555557544237	0.242747594776581	0.386033987985157	-0.0674196033244066	0.254389940808412	-0.0475059211446162	-0.228509014982985	-0.116389127556475	0.875395311872447	0.283483846157081	0.0829242161275889	0.00470553487050093	0.63486372434723	0.0687731301503155	0.738054022162069	0.103231720290125	0.411253640069286	-0.35100885219824	-0.000899815387899192	-0.0147124587072967	0.247134486115858	-0.0296575044408142	-0.16728491647713	0.340386935605959	0.294683556615548	0.236379564968731	0.0685550341778944	-0.303235471605171	-0.0575084676437499	-0.0277184540976873	0.180771003648922	-0.122298860269752	0.0687349100156611	-0.243900808693019	-0.0669874692704166	-0.181013628874241	0.00993316741611546	0.196523495863352	-0.301848338476853	0.0169128406460266	-0.32469875865599	0.031983618396267	0.258683565127996	0.0107297309117099	0.994948686317225
QSF_AIP.1.2	QSF_AIP.1.2	AIP_RAT	grey	0.0501719526459408	0.114127947271197	-0.11139918914784	0.0968767222074657	-0.196113006492487	-0.216671596784019	-0.223931817669287	0.0842082435992505	-0.263627619701125	0.723921415522483	0.420462242048732	0.431729817312877	0.494470575705269	0.163503023884051	0.122866735233682	0.110515238288998	0.552827342469803	0.05897363751762	-0.306719062708288	-0.205559946913547	-0.112963180859039	-0.175081654700744	-0.390419459752913	-0.227556541618121	0.0175714234990826	0.330891063136336	-0.0705845531355724	0.420038082982218	-0.0993287685215703	-0.217053410146225	-0.0407819769581139	-0.070266944747693	0.0450749048278455	0.014243497967796	0.165885265278337	0.19729077169129	0.329614418945927	0.0458782280200835	0.348221819130457	0.321165695047162	0.133606535938613	0.155011759949706	0.302798462815334	-0.187357108649986	0.0269926505361332	0.143756581195301
QSF_AIP.2.2	QSF_AIP.2.2	.	grey	0.0322666982685601	-0.0752515861753775	-0.120969084104136	-0.173794806745276	-0.129186583088297	-0.484830463660935	-0.0655257766303261	0.0769253924592759	-0.1947447512959	0.820360479830812	0.595967402521689	0.392961732844588	0.217878269449568	0.361366244013013	0.000270030169520843	0.644423195532287	0.587793341651996	0.166519769154104	0.0335415371863435	-0.310848736041404	-0.132996889961365	-0.338260250778211	-0.305586595470631	-0.0258706474617952	-0.299290019178832	-0.0130853666079902	-0.103282745507662	0.101767847222244	0.225174073586349	-0.0751757484808042	0.232298435519851	0.132237754833479	0.0267120831084826	-0.0829936385634375	0.212691768332793	0.343241992706966	0.358774075140679	0.354793943905622	0.0284638965847613	0.203914422593328	0.118074289101067	0.31804376087779	0.0782720846340565	-0.364583125673719	0.813387526861693	0.0248995244634396
QSF_AK1D1.1.2	QSF_AK1D1.1.2	AK1D1_HUMAN	grey	0.0597160339319902	0.00827314323989209	-0.084370999507071	-0.0681308198748135	0.191153383178571	0.238939395463994	-0.0882644939663592	0.128799997004148	0.0799298287968375	0.674101111299438	0.953581989236207	0.552057373936484	0.631288800492153	0.174630705959607	0.0880193750466068	0.533791765267311	0.362817047526889	0.573248735248841	0.222381231277825	0.42862619369672	0.383585742164622	0.366618340835279	0.151845617634508	0.139455716141304	0.0234400109721579	-0.0886667575793945	-0.133344823453448	-0.0979729330562173	-0.182770597544196	-0.0776270045352341	0.0693234436042175	-0.146212878038843	-0.191568047809983	-0.0941122234814311	-0.208310196111204	-0.0206294149781699	-0.0816932457348064	-0.0206606684807903	-0.248865008038235	-0.0971669360325075	-0.119962720747014	0.0435705461805031	0.183787184529499	0.312027056831471	0.11306985775057	0.00152294472539916
[truncated: 24,562 more rows]
[truncated: 24 more columns]
