# Supplementary material for: Sex-specific co-expression networks and sex-biased gene expression in the salmonid Brook Charr Salvelinus fontinalis
Source: bioRxiv or medRxiv preprint supplement (doi:10.1101/305680), 2019-01-15
Supplement: Supplementary file [file 305680-1.pdf]

## SUPPLEMENTAL RESULTS

1  
2  
3  
4

The following figures and tables support the main text.

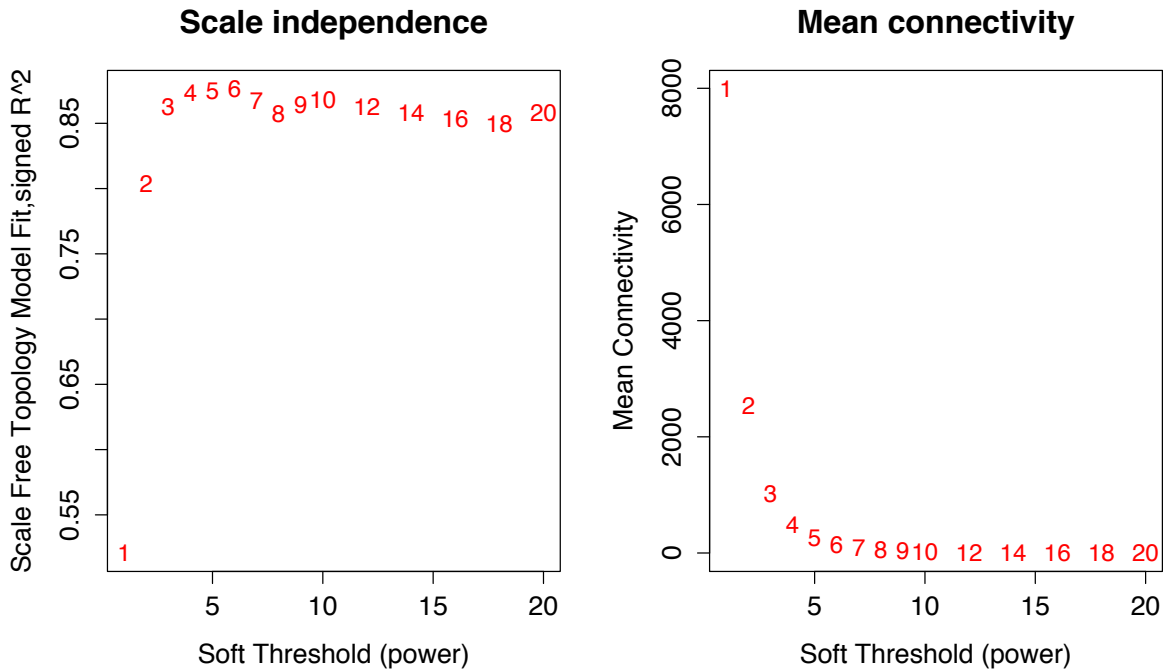

5

6 **Figure S1.** Soft threshold power selection in the female Brook Charr network after outliers were removed. Both  
7 (A) scale independence and (B) mean connectivity are used to determine the best soft threshold power. Scale free  
8 topology was chosen as  $\beta_1=6$ , which also is the default for WGCNA.

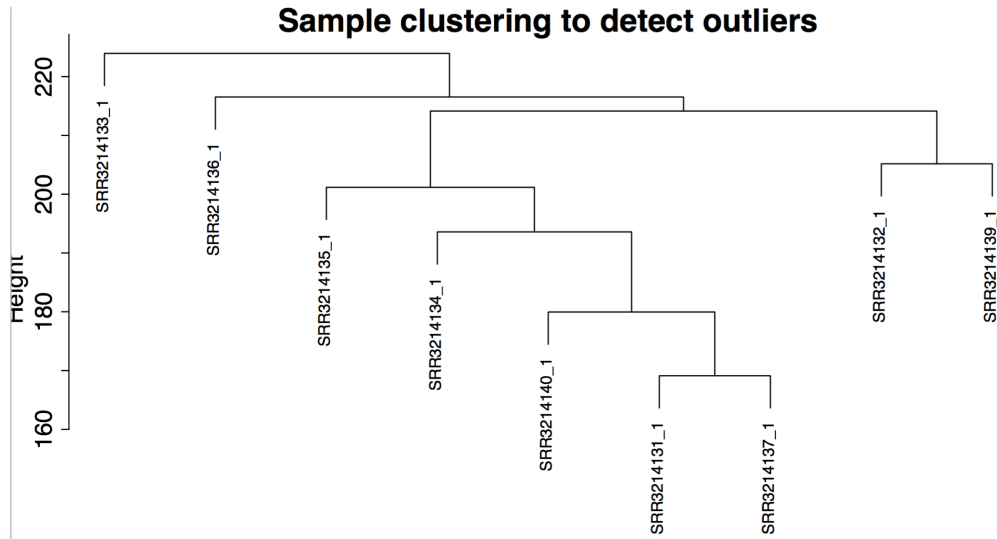

10

11 **Figure S2.** Nine individual male Arctic Charr samples clustered by gene expression similarity. Only the samples  
 12 from the control condition (8 °C) were used to avoid large experimental effects on the data and to make parallel  
 13 with the Brook Charr data.

14

15

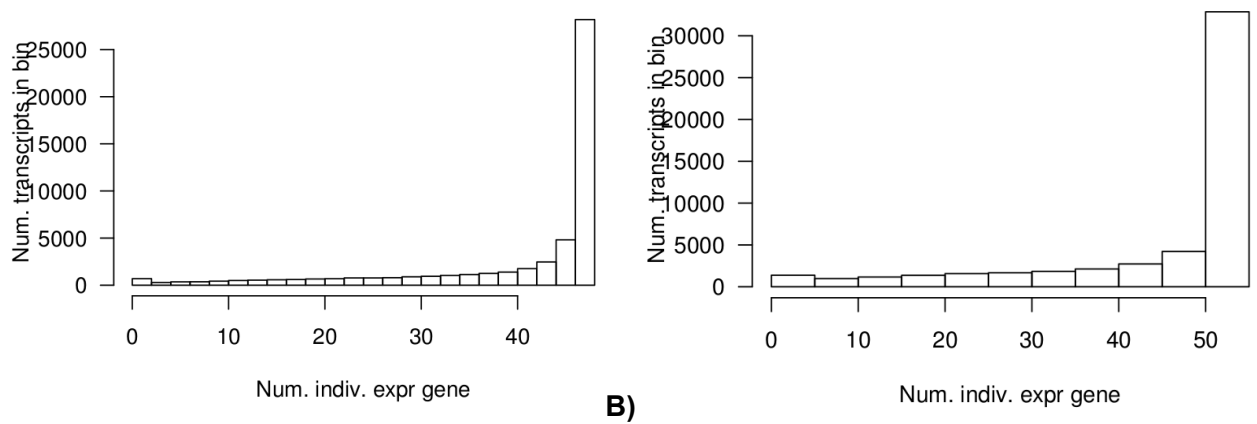

18 **Figure S3.** The number of transcripts expressed in the number of individuals in the Brook Charr (A) females and  
 19 (B) males. This indicates that most genes, when found to be expressed at all, were expressed in most individuals.  
 20 Within a sex, very few genes showed expression specific to a small number of samples.

20

21

22

A)

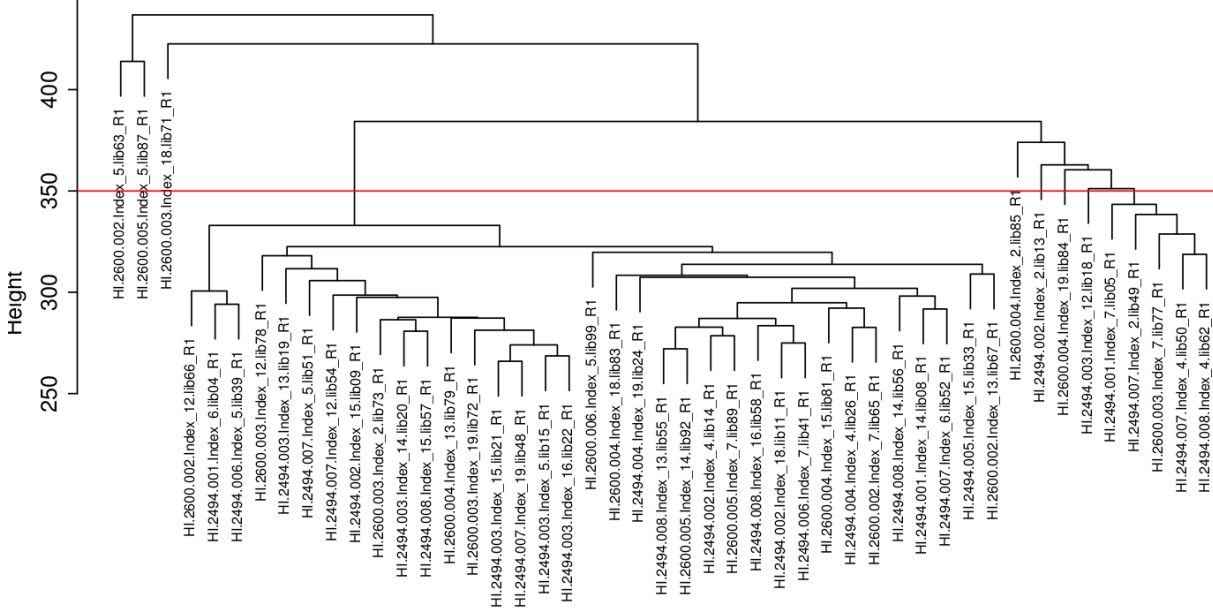

23

24

B)

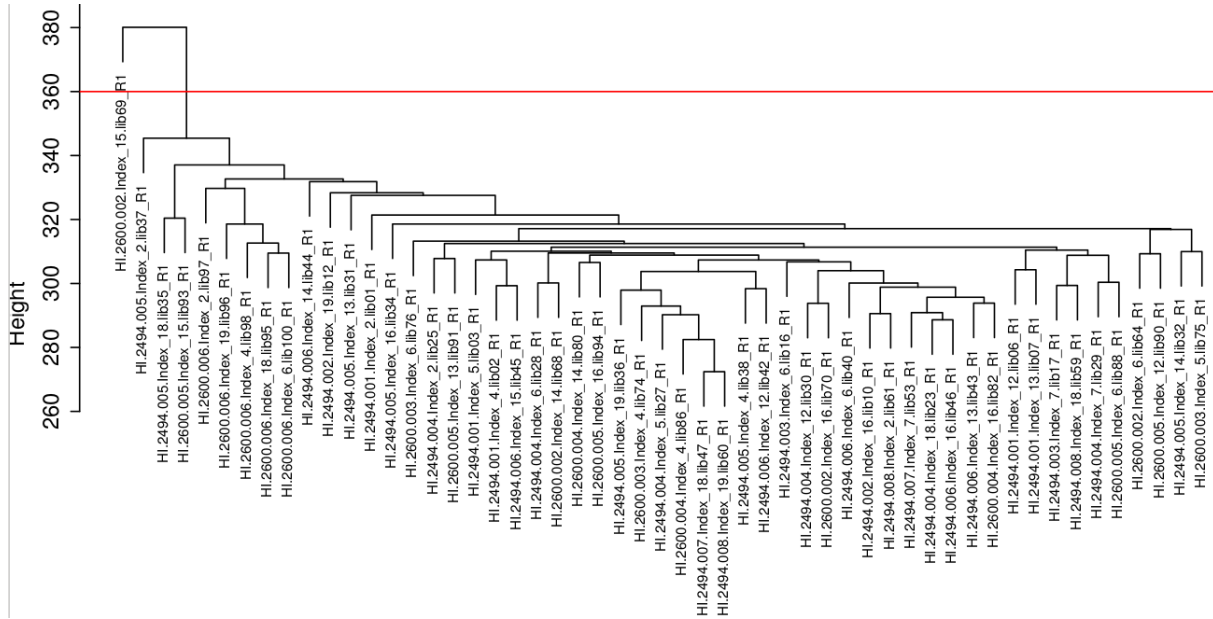

25

26

27

28

29

30

31

32

**Figure S4.** Clustering of samples by transcriptome similarity within (A) females and (B) males. Outliers were removed by discarding samples that did not group with the rest of the samples according to the cut height shown by the red horizontal line. Selection of cut height was determined by observing the clustering of samples with phenotypes and removing groups that did not fit with the rest of the samples, which included one extreme outlier male (also see Figure 1) and a subset of females with large liver weight. See Methods for further discussion on justification for outlier removal.

33

34

35 **A)**

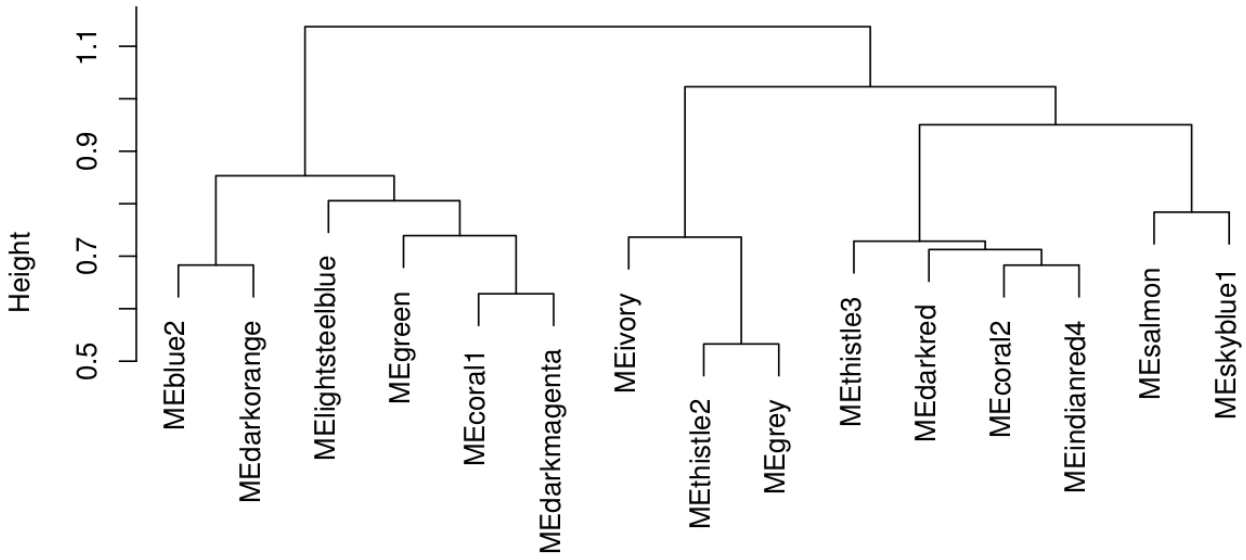

36

37 **B)**

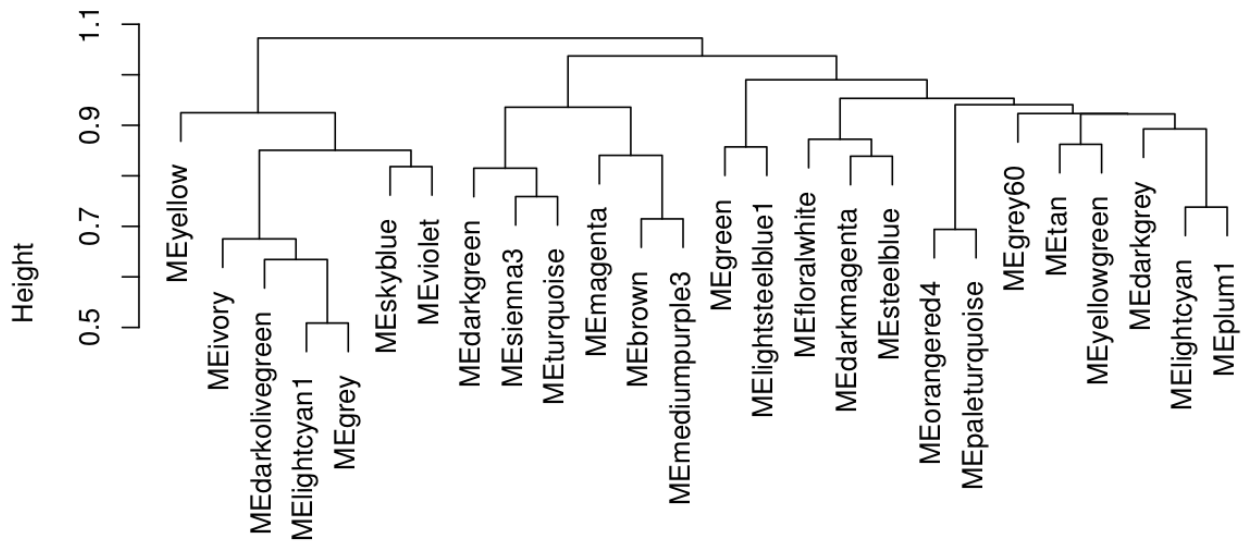

38

39 **Figure S5.** Merged modules clustered by eigengene similarity in (A) female and (B) male Brook Charr.

40

41

42

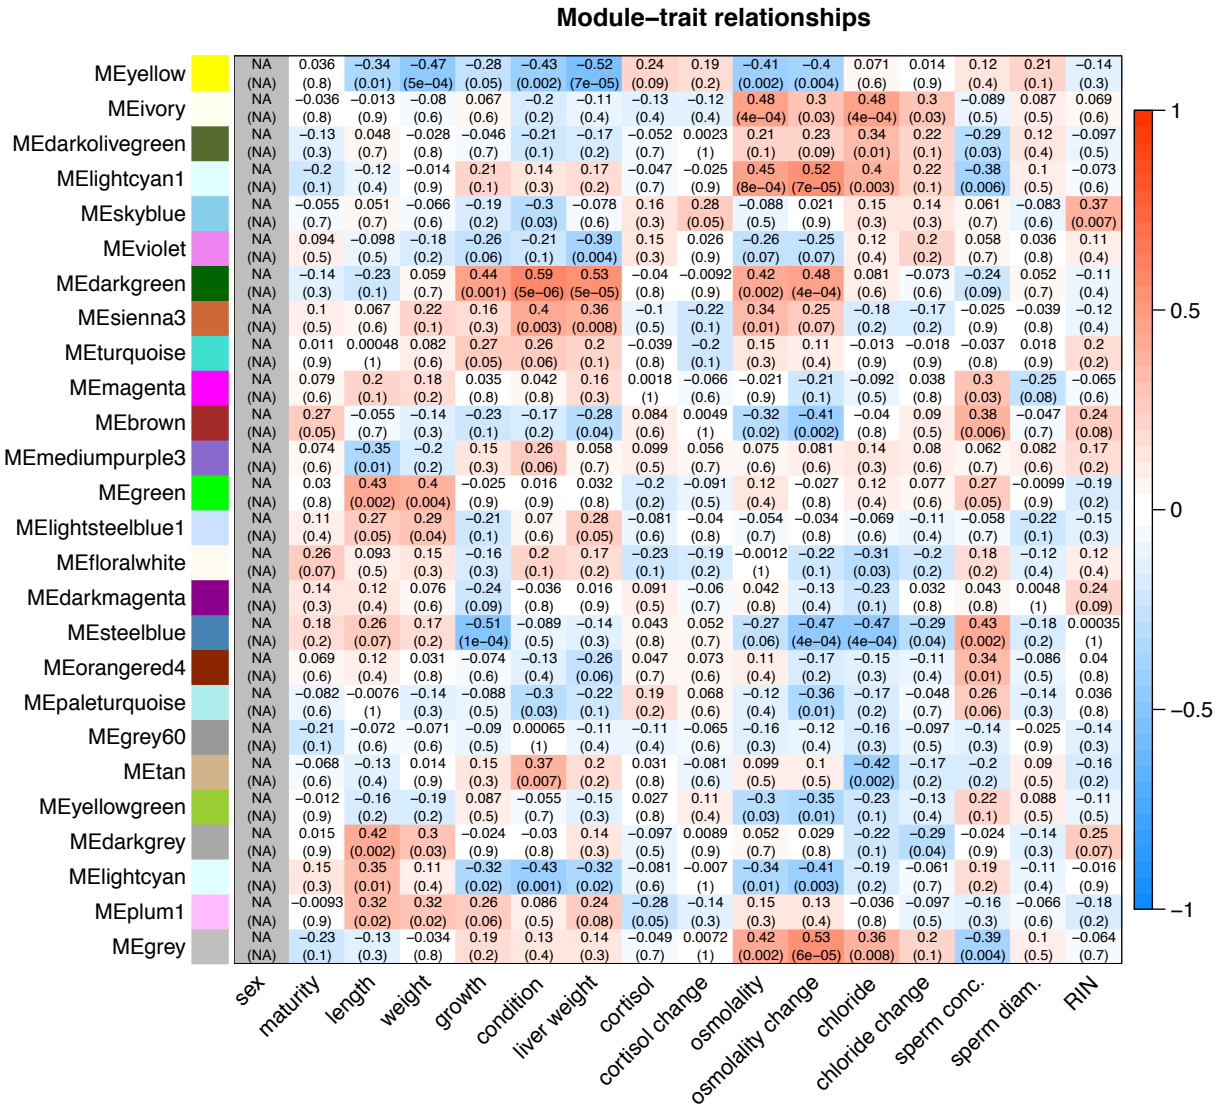

43

44 **Figure S6.** Module-trait relationships for Brook Charr males, including correlation r-value and p-values. The  
 45 boldness of color indicates the strength of the relationship. Module-trait correlations are also shown in Table 1  
 46 with more general grouping of traits alongside other metrics such as module size and enriched Gene Ontology  
 47 categories. Female module-trait relationships are shown in Figure 3.



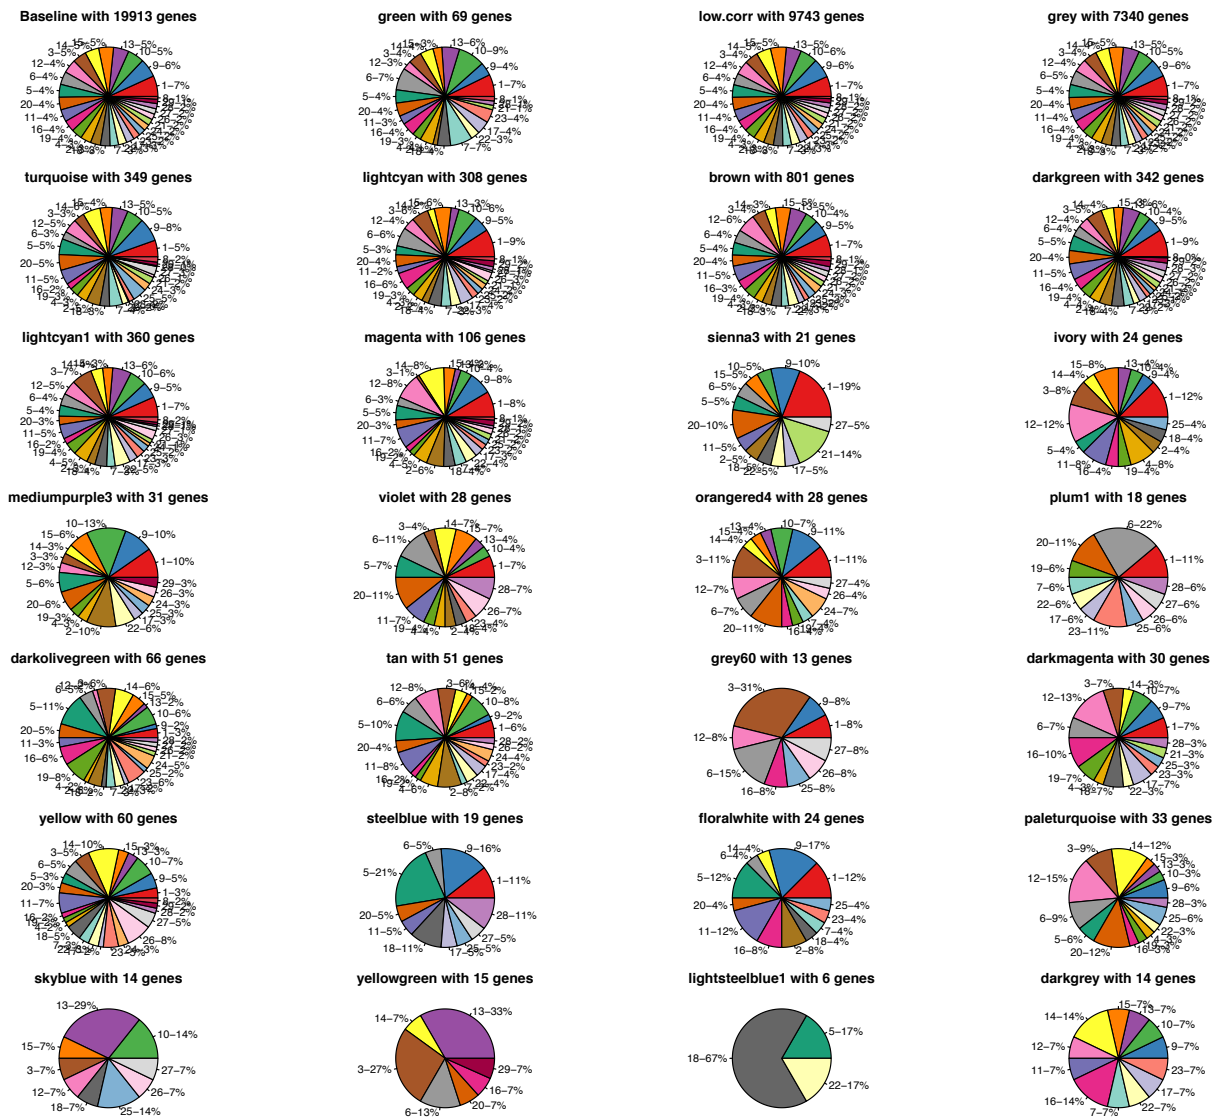

55

56 **Figure S8.** Chromosome overrepresentation evaluated within the male clusters. The proportion of transcripts per  
 57 chromosome is shown for the baseline (all expressed unique genes), and each male module. The name of the  
 58 module and the number of genes within the module are shown above each chart. Significant overrepresented  
 59 chromosomes and base pair location on chromosome positions are shown in Figure 8.

60

61 **Table S1.** Overrepresented chromosomes for individual female modules ( $p \leq 0.05$ ) shown alongside the number  
62 of genes within the chromosome in the module and the number of other genes in the module not in the  
63 chromosome. Note: low.corr is comprised of the genes that are not within the most connected 25,000 genes put  
64 into the network.

| <b>Chromosome RefSeq Accession</b> | <b>Chromosome Name</b> | <b>Module</b>  | <b>P-value</b> | <b>Number of genes in chromosome in module</b> | <b>Number of genes not in chromosome in module</b> |
|------------------------------------|------------------------|----------------|----------------|------------------------------------------------|----------------------------------------------------|
| NC_027319.1                        | chr20                  | salmon         | 0.005          | 15                                             | 154                                                |
| NC_027325.1                        | chr26                  | green          | 0.006          | 10                                             | 198                                                |
| NC_027305.1                        | chr6                   | low.corr       | 0.009          | 383                                            | 9506                                               |
| NC_027306.1                        | chr7                   | salmon         | 0.016          | 0                                              | 169                                                |
| NC_027308.1                        | chr9                   | low.corr       | 0.018          | 645                                            | 9244                                               |
| NC_027327.1                        | chr28                  | thistle3       | 0.026          | 5                                              | 92                                                 |
| NC_027320.1                        | chr21                  | low.corr       | 0.034          | 230                                            | 9659                                               |
| NC_027328.1                        | chr29                  | coral2         | 0.034          | 4                                              | 80                                                 |
| NC_027316.1                        | chr17                  | darkorange     | 0.034          | 15                                             | 317                                                |
| NC_027308.1                        | chr9                   | salmon         | 0.036          | 4                                              | 165                                                |
| NC_027302.1                        | chr3                   | skyblue1       | 0.036          | 5                                              | 36                                                 |
| NC_027304.1                        | chr5                   | green          | 0.037          | 15                                             | 193                                                |
| NC_027305.1                        | chr6                   | darkorange     | 0.038          | 22                                             | 310                                                |
| NC_027310.1                        | chr11                  | indianred4     | 0.040          | 30                                             | 488                                                |
| NC_027325.1                        | chr26                  | skyblue1       | 0.041          | 3                                              | 38                                                 |
| NC_027313.1                        | chr14                  | green          | 0.042          | 16                                             | 192                                                |
| NC_027312.1                        | chr13                  | lightsteelblue | 0.045          | 2                                              | 5                                                  |
| NC_027320.1                        | chr21                  | darkred        | 0.045          | 71                                             | 4088                                               |
| NC_027305.1                        | chr6                   | darkred        | 0.047          | 200                                            | 3959                                               |
| NC_027327.1                        | chr28                  | blue2          | 0.047          | 21                                             | 763                                                |
| NC_027308.1                        | chr9                   | darkred        | 0.049          | 227                                            | 3932                                               |

65



66 **Table S2.** Overrepresented chromosomes for individual male modules ( $p \leq 0.05$ ) shown alongside the number of  
67 genes within the chromosome in the module and the number of other genes in the module not in the chromosome.  
68 Note: low.corr is comprised of the genes that are not within the most connected 25,000 genes put into the network.

| <b>Chromosome<br/>RefSeq<br/>Accession</b> | <b>Chromosome<br/>Name</b> | <b>Module</b>   | <b>P-value</b> | <b>Number of<br/>genes in<br/>chromosome<br/>in module</b> | <b>Number of genes<br/>not in<br/>chromosome in<br/>module</b> |
|--------------------------------------------|----------------------------|-----------------|----------------|------------------------------------------------------------|----------------------------------------------------------------|
| NC_027317.1                                | chr18                      | lightsteelblue1 | 1.42E-05       | 4                                                          | 2                                                              |
| NC_027312.1                                | chr13                      | yellowgreen     | 0.001          | 5                                                          | 10                                                             |
| NC_027316.1                                | chr17                      | turquoise       | 0.002          | 1                                                          | 348                                                            |
| NC_027302.1                                | chr3                       | grey60          | 0.002          | 4                                                          | 9                                                              |
| NC_027305.1                                | chr6                       | low.corr        | 0.004          | 372                                                        | 9371                                                           |
| NC_027302.1                                | chr3                       | yellowgreen     | 0.004          | 4                                                          | 11                                                             |
| NC_027312.1                                | chr13                      | skyblue         | 0.004          | 4                                                          | 10                                                             |
| NC_027324.1                                | chr25                      | turquoise       | 0.005          | 16                                                         | 333                                                            |
| NC_027325.1                                | chr26                      | yellow          | 0.005          | 5                                                          | 55                                                             |
| NC_027305.1                                | chr6                       | plum1           | 0.006          | 4                                                          | 14                                                             |
| NC_027304.1                                | chr5                       | steelblue       | 0.007          | 4                                                          | 15                                                             |
| NC_027305.1                                | chr6                       | grey            | 0.009          | 348                                                        | 6992                                                           |
| NC_027320.1                                | chr21                      | sienna3         | 0.009          | 3                                                          | 18                                                             |
| NC_027307.1                                | chr8                       | low.corr        | 0.012          | 68                                                         | 9675                                                           |
| NC_027321.1                                | chr22                      | lightcyan1      | 0.013          | 18                                                         | 342                                                            |
| NC_027311.1                                | chr12                      | paleturquoise   | 0.015          | 5                                                          | 28                                                             |
| NC_027304.1                                | chr5                       | darkolivegreen  | 0.021          | 7                                                          | 59                                                             |
| NC_027316.1                                | chr17                      | low.corr        | 0.026          | 277                                                        | 9466                                                           |
| NC_027311.1                                | chr12                      | brown           | 0.029          | 49                                                         | 752                                                            |
| NC_027327.1                                | chr28                      | turquoise       | 0.034          | 1                                                          | 348                                                            |
| NC_027324.1                                | chr25                      | skyblue         | 0.037          | 2                                                          | 12                                                             |
| NC_027327.1                                | chr28                      | steelblue       | 0.041          | 2                                                          | 17                                                             |
| NC_027306.1                                | chr7                       | green           | 0.043          | 5                                                          | 64                                                             |
| NC_027311.1                                | chr12                      | darkmagenta     | 0.044          | 4                                                          | 26                                                             |
| NC_027314.1                                | chr15                      | low.corr        | 0.045          | 506                                                        | 9237                                                           |
| NC_027319.1                                | chr20                      | paleturquoise   | 0.046          | 4                                                          | 29                                                             |
| NC_027312.1                                | chr13                      | lightcyan       | 0.048          | 8                                                          | 300                                                            |
| NC_027300.1                                | chr1                       | sienna3         | 0.051          | 4                                                          | 17                                                             |

69
